# Supplementary material
Source: publisher figshare collection journal article supplement (https://sage.figshare.com/ndownloader/files/18046172)
Supplement: Supplementary file 1 [file 18046172]

Area	Name	Concate	Number	Male	Birthyear	Party	KMT	DPP	Vote	Voteshare	Win	Incumbent	Num_Can	Upper Party	Redesign_Ele				Area
»O¥_¥«¥_§ë°Ï«Ø¥Á¨½	¶À«Ø±ê	»O¥_¥«¥_§ë°Ï«Ø¥Á¨½¶À«Ø±ê	1	1	1963	µLÄÒÄy¤Î¥¼¸g¬FÄÒ±ÀÂË	0	0	831	0.3681	0	0	2	KMT	0	0.13549761	0.53466885	1.870316552	»O¥_¥«¥_§ë°Ï«Ø¥Á¨½
»O¥_¥«¥_§ë°Ï«Ø¥Á¨½	¶À§Ó¥ß	»O¥_¥«¥_§ë°Ï«Ø¥Á¨½¶À§Ó¥ß	2	1	1959	µLÄÒÄy¤Î¥¼¸g¬FÄÒ±ÀÂË	0	0	1426	0.6318	1	1	2	KMT	0	0.53466885	0.53466885	1.870316552	»O¥_¥«¥_§ë°Ï«Ø¥Á¨½
»O¥_¥«¥_§ë°Ï¤åªL¨½	¼B¾Ë©÷	»O¥_¥«¥_§ë°Ï¤åªL¨½¼B¾Ë©÷	1	1	1946	¤¤°ê°ê¥ÁÄÒ	1	0	1979	1	1	1	1	KMT	0	1	1	1	»O¥_¥«¥_§ë°Ï¤åªL¨½
»O¥_¥«¥_§ë°Ï¥ÛµP¨½	¸­°öøÊ	»O¥_¥«¥_§ë°Ï¥ÛµP¨½¸­°öøÊ	1	1	1960	µLÄÒÄy¤Î¥¼¸g¬FÄÒ±ÀÂË	0	0	749	0.239	0	0	3	KMT	0	0.057121	0.3467802	2.883670982	»O¥_¥«¥_§ë°Ï¥ÛµP¨½
»O¥_¥«¥_§ë°Ï¥ÛµP¨½	§ù¬±«n	»O¥_¥«¥_§ë°Ï¥ÛµP¨½§ù¬±«n	2	1	1929	¤¤°ê°ê¥ÁÄÒ	1	0	1157	0.3692	0	1	3	KMT	0	0.19342964	0.3467802	2.883670982	»O¥_¥«¥_§ë°Ï¥ÛµP¨½
»O¥_¥«¥_§ë°Ï¥ÛµP¨½	¶Àº¡©f	»O¥_¥«¥_§ë°Ï¥ÛµP¨½¶Àº¡©f	3	0	1959	µLÄÒÄy¤Î¥¼¸g¬FÄÒ±ÀÂË	0	0	1227	0.3916	1	0	3	KMT	0	0.3467802	0.3467802	2.883670982	»O¥_¥«¥_§ë°Ï¥ÛµP¨½
»O¥_¥«¥_§ë°ÏºÖ¿³¨½	½²¬h¦À	»O¥_¥«¥_§ë°ÏºÖ¿³¨½½²¬h¦À	1	1	1955	µLÄÒÄy¤Î¥¼¸g¬FÄÒ±ÀÂË	0	0	3495	1	1	1	1	KMT	0	1	1	1	»O¥_¥«¥_§ë°ÏºÖ¿³¨½
»O¥_¥«¥_§ë°Ïºa¥ú¨½	Ä¬Ä_¹a	»O¥_¥«¥_§ë°Ïºa¥ú¨½Ä¬Ä_¹a	1	0	1951	µLÄÒÄy¤Î¥¼¸g¬FÄÒ±ÀÂË	0	0	2295	0.6012	1	1	2	KMT	0	0.36144144	0.52040313	1.921587213	»O¥_¥«¥_§ë°Ïºa¥ú¨½
»O¥_¥«¥_§ë°Ïºa¥ú¨½	½±¼B®ÛªK	»O¥_¥«¥_§ë°Ïºa¥ú¨½½±¼B®ÛªK	2	0	1939	µLÄÒÄy¤Î¥¼¸g¬FÄÒ±ÀÂË	0	0	1522	0.3987	0	0	2	KMT	0	0.52040313	0.52040313	1.921587213	»O¥_¥«¥_§ë°Ïºa¥ú¨½
»O¥_¥«¥_§ë°ÏºaµØ¨½	¯Îºa´Ó	»O¥_¥«¥_§ë°ÏºaµØ¨½¯Îºa´Ó	1	1	1951	µLÄÒÄy¤Î¥¼¸g¬FÄÒ±ÀÂË	0	0	2088	0.4944	0	0	2	KMT	0	0.24443136	0.49996161	2.000153572	»O¥_¥«¥_§ë°ÏºaµØ¨½
»O¥_¥«¥_§ë°ÏºaµØ¨½	¦óº~²M	»O¥_¥«¥_§ë°ÏºaµØ¨½¦óº~²M	2	1	1953	¤¤°ê°ê¥ÁÄÒ	1	0	2135	0.5055	1	1	2	KMT	0	0.49996161	0.49996161	2.000153572	»O¥_¥«¥_§ë°ÏºaµØ¨½
»O¥_¥«¥_§ë°Ï¸Î¥Á¨½	ÁÂ©µÀs	»O¥_¥«¥_§ë°Ï¸Î¥Á¨½ÁÂ©µÀs	1	1	1951	µLÄÒÄy¤Î¥¼¸g¬FÄÒ±ÀÂË	0	0	1708	0.4123	0	1	2	KMT	0	0.16999129	0.51526505	1.940748747	»O¥_¥«¥_§ë°Ï¸Î¥Á¨½
»O¥_¥«¥_§ë°Ï¸Î¥Á¨½	Áé¸q¬K	»O¥_¥«¥_§ë°Ï¸Î¥Á¨½Áé¸q¬K	2	1	1946	¤¤°ê°ê¥ÁÄÒ	1	0	2434	0.5876	1	0	2	KMT	0	0.51526505	0.51526505	1.940748747	»O¥_¥«¥_§ë°Ï¸Î¥Á¨½
»O¥_¥«¥_§ë°Ï®¶µØ¨½	³¯¨KµM	»O¥_¥«¥_§ë°Ï®¶µØ¨½³¯¨KµM	1	1	1946	µLÄÒÄy¤Î¥¼¸g¬FÄÒ±ÀÂË	0	0	1546	0.367	0	0	3	KMT	0	0.134689	0.43269641	2.3110892	»O¥_¥«¥_§ë°Ï®¶µØ¨½
»O¥_¥«¥_§ë°Ï®¶µØ¨½	ªL©ú³q	»O¥_¥«¥_§ë°Ï®¶µØ¨½ªL©ú³q	2	1	1947	µLÄÒÄy¤Î¥¼¸g¬FÄÒ±ÀÂË	0	0	402	0.0954	0	0	3	KMT	0	0.14379016	0.43269641	2.3110892	»O¥_¥«¥_§ë°Ï®¶µØ¨½
»O¥_¥«¥_§ë°Ï®¶µØ¨½	¸­¥ú¥|	»O¥_¥«¥_§ë°Ï®¶µØ¨½¸­¥ú¥|	3	1	1943	¤¤°ê°ê¥ÁÄÒ	1	0	2264	0.5375	1	1	3	KMT	0	0.43269641	0.43269641	2.3110892	»O¥_¥«¥_§ë°Ï®¶µØ¨½
»O¥_¥«¥_§ë°Ï¥Ã©M¨½	¦óºa§U	»O¥_¥«¥_§ë°Ï¥Ã©M¨½¦óºa§U	1	1	1945	¤¤°ê°ê¥ÁÄÒ	1	0	3869	1	1	1	1	KMT	0	1	1	1	»O¥_¥«¥_§ë°Ï¥Ã©M¨½
»O¥_¥«¥_§ë°Ï¥ÃªY¨½	¤ý¼y­¦	»O¥_¥«¥_§ë°Ï¥ÃªY¨½¤ý¼y­¦	1	1	1960	¤¤°ê°ê¥ÁÄÒ	1	0	1710	0.4494	0	0	2	KMT	0	0.20196036	0.50501061	1.980156417	»O¥_¥«¥_§ë°Ï¥ÃªY¨½
»O¥_¥«¥_§ë°Ï¥ÃªY¨½	¼ï¸U¥Í	»O¥_¥«¥_§ë°Ï¥ÃªY¨½¼ï¸U¥Í	2	1	1957	¤¤°ê°ê¥ÁÄÒ	1	0	2095	0.5505	1	0	2	KMT	0	0.50501061	0.50501061	1.980156417	»O¥_¥«¥_§ë°Ï¥ÃªY¨½
»O¥_¥«¥_§ë°Ï¥Ã©ú¨½	¦óÄR¬Â	»O¥_¥«¥_§ë°Ï¥Ã©ú¨½¦óÄR¬Â	1	0	1964	¤¤°ê°ê¥ÁÄÒ	1	0	1526	0.5432	1	1	3	KMT	0	0.29506624	0.48894513	2.045219266	»O¥_¥«¥_§ë°Ï¥Ã©ú¨½
»O¥_¥«¥_§ë°Ï¥Ã©ú¨½	¼ï¤å´¼	»O¥_¥«¥_§ë°Ï¥Ã©ú¨½¼ï¤å´¼	2	1	1962	µLÄÒÄy¤Î¥¼¸g¬FÄÒ±ÀÂË	0	0	1236	0.44	0	0	3	KMT	0	0.48866624	0.48894513	2.045219266	»O¥_¥«¥_§ë°Ï¥Ã©ú¨½
»O¥_¥«¥_§ë°Ï¥Ã©ú¨½	±iÄ£ÂE	»O¥_¥«¥_§ë°Ï¥Ã©ú¨½±iÄ£ÂE	3	1	1947	µLÄÒÄy¤Î¥¼¸g¬FÄÒ±ÀÂË	0	0	47	0.0167	0	0	3	KMT	0	0.48894513	0.48894513	2.045219266	»O¥_¥«¥_§ë°Ï¥Ã©ú¨½
»O¥_¥«¥_§ë°ÏªFµØ¨½	°K¤j²»	»O¥_¥«¥_§ë°ÏªFµØ¨½°K¤j²»	1	1	1961	¤¤°ê°ê¥ÁÄÒ	1	0	1712	0.6241	1	1	2	KMT	0	0.38950081	0.53072645	1.884209841	»O¥_¥«¥_§ë°ÏªFµØ¨½
»O¥_¥«¥_§ë°ÏªFµØ¨½	½²·ç±R	»O¥_¥«¥_§ë°ÏªFµØ¨½½²·ç±R	2	1	1953	µLÄÒÄy¤Î¥¼¸g¬FÄÒ±ÀÂË	0	0	1031	0.3758	0	0	2	KMT	0	0.53072645	0.53072645	1.884209841	»O¥_¥«¥_§ë°ÏªFµØ¨½
»O¥_¥«¥_§ë°Ï¦N§Q¨½	¼B§Ç­è	»O¥_¥«¥_§ë°Ï¦N§Q¨½¼B§Ç­è	1	1	1959	µLÄÒÄy¤Î¥¼¸g¬FÄÒ±ÀÂË	0	0	2108	0.5576	1	0	2	KMT	0	0.31091776	0.50654705	1.974150279	»O¥_¥«¥_§ë°Ï¦N§Q¨½
»O¥_¥«¥_§ë°Ï¦N§Q¨½	¾H°ê¶¯	»O¥_¥«¥_§ë°Ï¦N§Q¨½¾H°ê¶¯	2	1	1942	¤¤°ê°ê¥ÁÄÒ	1	0	1672	0.4423	0	1	2	KMT	0	0.50654705	0.50654705	1.974150279	»O¥_¥«¥_§ë°Ï¦N§Q¨½
»O¥_¥«¥_§ë°Ï¦N¼y¨½	¶À³Ó©v	»O¥_¥«¥_§ë°Ï¦N¼y¨½¶À³Ó©v	1	1	1951	µLÄÒÄy¤Î¥¼¸g¬FÄÒ±ÀÂË	0	0	1713	0.5756	1	1	2	KMT	0	0.33131536	0.51134585	1.955623576	»O¥_¥«¥_§ë°Ï¦N¼y¨½
»O¥_¥«¥_§ë°Ï¦N¼y¨½	¿à©[Às	»O¥_¥«¥_§ë°Ï¦N¼y¨½¿à©[Às	2	1	1953	¤¤°ê°ê¥ÁÄÒ	1	0	1263	0.4243	0	0	2	KMT	0	0.51134585	0.51134585	1.955623576	»O¥_¥«¥_§ë°Ï¦N¼y¨½
»O¥_¥«¥_§ë°Ï´L½å¨½	¼ï¦Pµo	»O¥_¥«¥_§ë°Ï´L½å¨½¼ï¦Pµo	1	1	1952	¤¤°ê°ê¥ÁÄÒ	1	0	2101	1	1	1	1	KMT	0	1	1	1	»O¥_¥«¥_§ë°Ï´L½å¨½
»O¥_¥«¥_§ë°Ï¥ß½å¨½	³¯´Â±l	»O¥_¥«¥_§ë°Ï¥ß½å¨½³¯´Â±l	1	1	1957	µLÄÒÄy¤Î¥¼¸g¬FÄÒ±ÀÂË	0	0	1221	0.3908	0	1	2	KMT	0	0.15272464	0.52372745	1.909390084	»O¥_¥«¥_§ë°Ï¥ß½å¨½
»O¥_¥«¥_§ë°Ï¥ß½å¨½	ªôºÖ»È	»O¥_¥«¥_§ë°Ï¥ß½å¨½ªôºÖ»È	2	1	1959	µLÄÒÄy¤Î¥¼¸g¬FÄÒ±ÀÂË	0	0	1903	0.6091	1	0	2	KMT	0	0.52372745	0.52372745	1.909390084	»O¥_¥«¥_§ë°Ï¥ß½å¨½
»O¥_¥«¥_§ë°Ï¥ß¹A¨½	³¯ºa	»O¥_¥«¥_§ë°Ï¥ß¹A¨½³¯ºa	1	1	1959	µLÄÒÄy¤Î¥¼¸g¬FÄÒ±ÀÂË	0	0	2147	0.4185	0	0	2	KMT	0	0.17514225	0.51316821	1.948678777	»O¥_¥«¥_§ë°Ï¥ß¹A¨½
»O¥_¥«¥_§ë°Ï¥ß¹A¨½	¼ï«Øºa	»O¥_¥«¥_§ë°Ï¥ß¹A¨½¼ï«Øºa	2	1	1960	µLÄÒÄy¤Î¥¼¸g¬FÄÒ±ÀÂË	0	0	2983	0.5814	1	1	2	KMT	0	0.51316821	0.51316821	1.948678777	»O¥_¥«¥_§ë°Ï¥ß¹A¨½
»O¥_¥«¥_§ë°Ï¤K¥P¨½	¶À¥Ã²M	»O¥_¥«¥_§ë°Ï¤K¥P¨½¶À¥Ã²M	1	1	1967	µLÄÒÄy¤Î¥¼¸g¬FÄÒ±ÀÂË	0	0	2453	0.8182	1	1	2	KMT	0	0.66945124	0.70246613	1.423556179	»O¥_¥«¥_§ë°Ï¤K¥P¨½
»O¥_¥«¥_§ë°Ï¤K¥P¨½	³¯¦N§Q	»O¥_¥«¥_§ë°Ï¤K¥P¨½³¯¦N§Q	2	1	1968	µLÄÒÄy¤Î¥¼¸g¬FÄÒ±ÀÂË	0	0	545	0.1817	0	0	2	KMT	0	0.70246613	0.70246613	1.423556179	»O¥_¥«¥_§ë°Ï¤K¥P¨½
»O¥_¥«¥_§ë°Ï¬w¬ü¨½	·¨¸U	»O¥_¥«¥_§ë°Ï¬w¬ü¨½·¨¸U	1	1	1948	¥Á¥D¶i¨BÄÒ	0	1	595	0.4274	0	1	2	KMT	0	0.18267076	0.51042701	1.959143972	»O¥_¥«¥_§ë°Ï¬w¬ü¨½
»O¥_¥«¥_§ë°Ï¬w¬ü¨½	ªL¤Ñ¨Ó	»O¥_¥«¥_§ë°Ï¬w¬ü¨½ªL¤Ñ¨Ó	2	1	1951	µLÄÒÄy¤Î¥¼¸g¬FÄÒ±ÀÂË	0	0	797	0.5725	1	0	2	KMT	0	0.51042701	0.51042701	1.959143972	»O¥_¥«¥_§ë°Ï¬w¬ü¨½
»O¥_¥«¥_§ë°Ï©_©¥¨½	ÃÓ³Ó°ê	»O¥_¥«¥_§ë°Ï©_©¥¨½ÃÓ³Ó°ê	1	1	1951	¤¤°ê°ê¥ÁÄÒ	1	0	2013	0.3675	1	0	3	KMT	0	0.13505625	0.33866771	2.952746809	»O¥_¥«¥_§ë°Ï©_©¥¨½
»O¥_¥«¥_§ë°Ï©_©¥¨½	°ª¬üµØ	»O¥_¥«¥_§ë°Ï©_©¥¨½°ª¬üµØ	2	0	1953	µLÄÒÄy¤Î¥¼¸g¬FÄÒ±ÀÂË	0	0	1498	0.2735	0	0	3	KMT	0	0.2098585	0.33866771	2.952746809	»O¥_¥«¥_§ë°Ï©_©¥¨½
»O¥_¥«¥_§ë°Ï©_©¥¨½	¿à¶i§Q	»O¥_¥«¥_§ë°Ï©_©¥¨½¿à¶i§Q	3	1	1959	µLÄÒÄy¤Î¥¼¸g¬FÄÒ±ÀÂË	0	0	1966	0.3589	0	1	3	KMT	0	0.33866771	0.33866771	2.952746809	»O¥_¥«¥_§ë°Ï©_©¥¨½
»O¥_¥«¥_§ë°Ï²M¦¿¨½	³¯ÂE?	»O¥_¥«¥_§ë°Ï²M¦¿¨½³¯ÂE?	1	1	1965	µLÄÒÄy¤Î¥¼¸g¬FÄÒ±ÀÂË	0	0	3859	1	1	1	1	KMT	0	1	1	1	»O¥_¥«¥_§ë°Ï²M¦¿¨½
»O¥_¥«¥_§ë°Ï¤¤¥¡¨½	³¯ª÷¸U	»O¥_¥«¥_§ë°Ï¤¤¥¡¨½³¯ª÷¸U	1	1	1964	µLÄÒÄy¤Î¥¼¸g¬FÄÒ±ÀÂË	0	0	2093	0.4498	0	0	3	KMT	0	0.20232004	0.42693125	2.342297501	»O¥_¥«¥_§ë°Ï¤¤¥¡¨½
»O¥_¥«¥_§ë°Ï¤¤¥¡¨½	³¯©Ó§B	»O¥_¥«¥_§ë°Ï¤¤¥¡¨½³¯©Ó§B	2	1	1964	µLÄÒÄy¤Î¥¼¸g¬FÄÒ±ÀÂË	0	0	389	0.0836	0	0	3	KMT	0	0.209309	0.42693125	2.342297501	»O¥_¥«¥_§ë°Ï¤¤¥¡¨½
»O¥_¥«¥_§ë°Ï¤¤¥¡¨½	³¯ÂE¶v	»O¥_¥«¥_§ë°Ï¤¤¥¡¨½³¯ÂE¶v	3	1	1956	µLÄÒÄy¤Î¥¼¸g¬FÄÒ±ÀÂË	0	0	2171	0.4665	1	1	3	KMT	0	0.42693125	0.42693125	2.342297501	»O¥_¥«¥_§ë°Ï¤¤¥¡¨½
»O¥_¥«¥_§ë°Ïªø¦w¨½	³¯³¹¥Í	»O¥_¥«¥_§ë°Ïªø¦w¨½³¯³¹¥Í	1	1	1954	µLÄÒÄy¤Î¥¼¸g¬FÄÒ±ÀÂË	0	0	2791	1	1	1	1	KMT	0	1	1	1	»O¥_¥«¥_§ë°Ïªø¦w¨½
»O¥_¥«¥_§ë°Ï¤j¦P¨½	¶À·ÓÁé	»O¥_¥«¥_§ë°Ï¤j¦P¨½¶À·ÓÁé	1	1	1961	¥Á¥D¶i¨BÄÒ	0	1	778	0.2264	0	0	4	KMT	0	0.05125696	0.30755853	3.251413641	»O¥_¥«¥_§ë°Ï¤j¦P¨½
»O¥_¥«¥_§ë°Ï¤j¦P¨½	Á§ªåªâ	»O¥_¥«¥_§ë°Ï¤j¦P¨½Á§ªåªâ	2	0	1956	¤¤°ê°ê¥ÁÄÒ	1	0	702	0.2043	0	0	4	KMT	0	0.09299545	0.30755853	3.251413641	»O¥_¥«¥_§ë°Ï¤j¦P¨½
»O¥_¥«¥_§ë°Ï¤j¦P¨½	¤ý¿ü®ü	»O¥_¥«¥_§ë°Ï¤j¦P¨½¤ý¿ü®ü	3	1	1957	µLÄÒÄy¤Î¥¼¸g¬FÄÒ±ÀÂË	0	0	1535	0.4468	1	1	4	KMT	0	0.29262569	0.30755853	3.251413641	»O¥_¥«¥_§ë°Ï¤j¦P¨½
»O¥_¥«¥_§ë°Ï¤j¦P¨½	±i¸q©ú	»O¥_¥«¥_§ë°Ï¤j¦P¨½±i¸q©ú	4	1	1957	µLÄÒÄy¤Î¥¼¸g¬FÄÒ±ÀÂË	0	0	420	0.1222	0	0	4	KMT	0	0.30755853	0.30755853	3.251413641	»O¥_¥«¥_§ë°Ï¤j¦P¨½
»O¥_¥«¥_§ë°Ï·Å¬u¨½	±iÄR¥É	»O¥_¥«¥_§ë°Ï·Å¬u¨½±iÄR¥É	1	0	1961	¤¤°ê°ê¥ÁÄÒ	1	0	1616	0.4505	0	0	2	KMT	0	0.20295025	0.50479061	1.981019417	»O¥_¥«¥_§ë°Ï·Å¬u¨½
»O¥_¥«¥_§ë°Ï·Å¬u¨½	³\´¼¥þ	»O¥_¥«¥_§ë°Ï·Å¬u¨½³\´¼¥þ	2	1	1981	µLÄÒÄy¤Î¥¼¸g¬FÄÒ±ÀÂË	0	0	1971	0.5494	1	1	2	KMT	0	0.50479061	0.50479061	1.981019417	»O¥_¥«¥_§ë°Ï·Å¬u¨½
»O¥_¥«¥_§ë°ÏªL¬u¨½	ºÞ¤å©¾	»O¥_¥«¥_§ë°ÏªL¬u¨½ºÞ¤å©¾	1	1	1961	µLÄÒÄy¤Î¥¼¸g¬FÄÒ±ÀÂË	0	0	463	0.2712	0	0	3	KMT	0	0.07354944	0.36903929	2.709738576	»O¥_¥«¥_§ë°ÏªL¬u¨½
»O¥_¥«¥_§ë°ÏªL¬u¨½	½²¨|§µ	»O¥_¥«¥_§ë°ÏªL¬u¨½½²¨|§µ	2	1	1947	¤¤°ê°ê¥ÁÄÒ	1	0	413	0.2419	0	0	3	KMT	0	0.13206505	0.36903929	2.709738576	»O¥_¥«¥_§ë°ÏªL¬u¨½
»O¥_¥«¥_§ë°ÏªL¬u¨½	³¯´fµØ	»O¥_¥«¥_§ë°ÏªL¬u¨½³¯´fµØ	3	0	1967	µLÄÒÄy¤Î¥¼¸g¬FÄÒ±ÀÂË	0	0	831	0.4868	1	1	3	KMT	0	0.36903929	0.36903929	2.709738576	»O¥_¥«¥_§ë°ÏªL¬u¨½
»O¥_¥«¥_§ë°Ï¤¤¤ß¨½	¸­®a©M	»O¥_¥«¥_§ë°Ï¤¤¤ß¨½¸­®a©M	1	1	1960	¤¤°ê°ê¥ÁÄÒ	1	0	1518	0.474	0	1	2	KMT	0	0.224676	0.50124681	1.995025165	»O¥_¥«¥_§ë°Ï¤¤¤ß¨½
»O¥_¥«¥_§ë°Ï¤¤¤ß¨½	®]¤h°í	»O¥_¥«¥_§ë°Ï¤¤¤ß¨½®]¤h°í	2	1	1959	µLÄÒÄy¤Î¥¼¸g¬FÄÒ±ÀÂË	0	0	1684	0.5259	1	0	2	KMT	0	0.50124681	0.50124681	1.995025165	»O¥_¥«¥_§ë°Ï¤¤¤ß¨½
»O¥_¥«¥_§ë°Ï¤¤±e¨½	¶À³\»Ê	»O¥_¥«¥_§ë°Ï¤¤±e¨½¶À³\»Ê	1	1	1972	µLÄÒÄy¤Î¥¼¸g¬FÄÒ±ÀÂË	0	0	1415	0.5628	1	0	2	KMT	0	0.31674384	0.50780025	1.969278274	»O¥_¥«¥_§ë°Ï¤¤±e¨½
»O¥_¥«¥_§ë°Ï¤¤±e¨½	·¨¸U¥Í	»O¥_¥«¥_§ë°Ï¤¤±e¨½·¨¸U¥Í	2	1	1939	¤¤°ê°ê¥ÁÄÒ	1	0	1099	0.4371	0	1	2	KMT	0	0.50780025	0.50780025	1.969278274	»O¥_¥«¥_§ë°Ï¤¤±e¨½
»O¥_¥«¥_§ë°Ï¶}©ú¨½	³¯ºû¨l	»O¥_¥«¥_§ë°Ï¶}©ú¨½³¯ºû¨l	1	1	1951	µLÄÒÄy¤Î¥¼¸g¬FÄÒ±ÀÂË	0	0	1810	0.5062	1	1	2	KMT	0	0.25623844	0.49997813	2.000087484	»O¥_¥«¥_§ë°Ï¶}©ú¨½
»O¥_¥«¥_§ë°Ï¶}©ú¨½	¥ªÄRªÚ	»O¥_¥«¥_§ë°Ï¶}©ú¨½¥ªÄRªÚ	2	0	1962	¤¤°ê°ê¥ÁÄÒ	1	0	1765	0.4937	0	0	2	KMT	0	0.49997813	0.49997813	2.000087484	»O¥_¥«¥_§ë°Ï¶}©ú¨½
»O¥_¥«¥_§ë°Ï¤¤©M¨½	¶À´º·×	»O¥_¥«¥_§ë°Ï¤¤©M¨½¶À´º·×	1	1	1952	¤¤°ê°ê¥ÁÄÒ	1	0	2273	1	1	1	1	KMT	0	1	1	1	»O¥_¥«¥_§ë°Ï¤¤©M¨½
»O¥_¥«¥_§ë°Ï´¼¤¯¨½	®}©y¼ä	»O¥_¥«¥_§ë°Ï´¼¤¯¨½®}©y¼ä	1	0	1963	µLÄÒÄy¤Î¥¼¸g¬FÄÒ±ÀÂË	0	0	1289	0.3744	0	0	2	KMT	0	0.14017536	0.53142561	1.881730916	»O¥_¥«¥_§ë°Ï´¼¤¯¨½
»O¥_¥«¥_§ë°Ï´¼¤¯¨½	³\¥@¶Ç	»O¥_¥«¥_§ë°Ï´¼¤¯¨½³\¥@¶Ç	2	1	1964	µLÄÒÄy¤Î¥¼¸g¬FÄÒ±ÀÂË	0	0	2153	0.6255	1	1	2	KMT	0	0.53142561	0.53142561	1.881730916	»O¥_¥«¥_§ë°Ï´¼¤¯¨½
»O¥_¥«¥_§ë°Ï¨q¤s¨½	³¯¹Ø´^	»O¥_¥«¥_§ë°Ï¨q¤s¨½³¯¹Ø´^	1	1	1953	¤¤°ê°ê¥ÁÄÒ	1	0	1302	0.6341	1	0	2	KMT	0	0.40208281	0.53589245	1.86604607	»O¥_¥«¥_§ë°Ï¨q¤s¨½
»O¥_¥«¥_§ë°Ï¨q¤s¨½	³Å®Ñ²W	»O¥_¥«¥_§ë°Ï¨q¤s¨½³Å®Ñ²W	2	1	1961	µLÄÒÄy¤Î¥¼¸g¬FÄÒ±ÀÂË	0	0	751	0.3658	0	1	2	KMT	0	0.53589245	0.53589245	1.86604607	»O¥_¥«¥_§ë°Ï¨q¤s¨½
»O¥_¥«¥_§ë°Ï¤å¤Æ¨½	°ª°·¦w	»O¥_¥«¥_§ë°Ï¤å¤Æ¨½°ª°·¦w	1	1	1960	µLÄÒÄy¤Î¥¼¸g¬FÄÒ±ÀÂË	0	0	370	0.1464	0	0	4	KMT	0	0.02143296	0.33085582	3.022464589	»O¥_¥«¥_§ë°Ï¤å¤Æ¨½
»O¥_¥«¥_§ë°Ï¤å¤Æ¨½	§õ¤jºû	»O¥_¥«¥_§ë°Ï¤å¤Æ¨½§õ¤jºû	2	1	1962	µLÄÒÄy¤Î¥¼¸g¬FÄÒ±ÀÂË	0	0	297	0.1175	0	0	4	KMT	0	0.03523921	0.33085582	3.022464589	»O¥_¥«¥_§ë°Ï¤å¤Æ¨½
»O¥_¥«¥_§ë°Ï¤å¤Æ¨½	©P¥@­^	»O¥_¥«¥_§ë°Ï¤å¤Æ¨½©P¥@­^	3	1	1947	¤¤°ê°ê¥ÁÄÒ	1	0	1211	0.4794	1	1	4	KMT	0	0.26506357	0.33085582	3.022464589	»O¥_¥«¥_§ë°Ï¤å¤Æ¨½
»O¥_¥«¥_§ë°Ï¤å¤Æ¨½	äk§Ó©ú	»O¥_¥«¥_§ë°Ï¤å¤Æ¨½äk§Ó©ú	4	1	1957	µLÄÒÄy¤Î¥¼¸g¬FÄÒ±ÀÂË	0	0	648	0.2565	0	0	4	KMT	0	0.33085582	0.33085582	3.022464589	»O¥_¥«¥_§ë°Ï¤å¤Æ¨½
»O¥_¥«¥_§ë°ÏÂ×¦~¨½	¾G°êµØ	»O¥_¥«¥_§ë°ÏÂ×¦~¨½¾G°êµØ	1	1	1958	µLÄÒÄy¤Î¥¼¸g¬FÄÒ±ÀÂË	0	0	984	0.3762	0	1	2	KMT	0	0.14152644	0.53052813	1.884914189	»O¥_¥«¥_§ë°ÏÂ×¦~¨½
»O¥_¥«¥_§ë°ÏÂ×¦~¨½	©P¦¿³·¯]	»O¥_¥«¥_§ë°ÏÂ×¦~¨½©P¦¿³·¯]	2	0	1949	µLÄÒÄy¤Î¥¼¸g¬FÄÒ±ÀÂË	0	0	1631	0.6237	1	0	2	KMT	0	0.53052813	0.53052813	1.884914189	»O¥_¥«¥_§ë°ÏÂ×¦~¨½
»O¥_¥«¥_§ë°Ï½_­»¨½	±i¸q³Õ	»O¥_¥«¥_§ë°Ï½_­»¨½±i¸q³Õ	1	1	1945	¤¤°ê°ê¥ÁÄÒ	1	0	1282	0.4544	1	0	3	KMT	0	0.20647936	0.35538666	2.813836625	»O¥_¥«¥_§ë°Ï½_­»¨½
»O¥_¥«¥_§ë°Ï½_­»¨½	°ªºaÂE	»O¥_¥«¥_§ë°Ï½_­»¨½°ªºaÂE	2	1	1972	µLÄÒÄy¤Î¥¼¸g¬FÄÒ±ÀÂË	0	0	796	0.2821	0	0	3	KMT	0	0.28605977	0.35538666	2.813836625	»O¥_¥«¥_§ë°Ï½_­»¨½
»O¥_¥«¥_§ë°Ï½_­»¨½	±i±Ó¶¯	»O¥_¥«¥_§ë°Ï½_­»¨½±i±Ó¶¯	3	1	1940	µLÄÒÄy¤Î¥¼¸g¬FÄÒ±ÀÂË	0	0	743	0.2633	0	1	3	KMT	0	0.35538666	0.35538666	2.813836625	»O¥_¥«¥_§ë°Ï½_­»¨½
»O¥_¥«¥_§ë°Ï®ç·½¨½	Â²ªÚ©ú	»O¥_¥«¥_§ë°Ï®ç·½¨½Â²ªÚ©ú	1	1	1954	µLÄÒÄy¤Î¥¼¸g¬FÄÒ±ÀÂË	0	0	1925	0.595	1	0	2	KMT	0	0.354025	0.51796901	1.930617432	»O¥_¥«¥_§ë°Ï®ç·½¨½
»O¥_¥«¥_§ë°Ï®ç·½¨½	¯Î­^µ¤	»O¥_¥«¥_§ë°Ï®ç·½¨½¯Î­^µ¤	2	1	1957	¤¤°ê°ê¥ÁÄÒ	1	0	1310	0.4049	0	1	2	KMT	0	0.51796901	0.51796901	1.930617432	»O¥_¥«¥_§ë°Ï®ç·½¨½
»O¥_¥«¥_§ë°Ï¤@¼w¨½	³¯¶i¶¯	»O¥_¥«¥_§ë°Ï¤@¼w¨½³¯¶i¶¯	1	1	1954	¤¤°ê°ê¥ÁÄÒ	1	0	3068	1	1	1	1	KMT	0	1	1	1	»O¥_¥«¥_§ë°Ï¤@¼w¨½
»O¥_¥«¥_§ë°ÏÃö´ç¨½	³\¼ü¯]	»O¥_¥«¥_§ë°ÏÃö´ç¨½³\¼ü¯]	1	0	1958	¤¤°ê°ê¥ÁÄÒ	1	0	1990	0.3215	0	0	3	KMT	0	0.10336225	0.34045254	2.937266968	»O¥_¥«¥_§ë°ÏÃö´ç¨½
»O¥_¥«¥_§ë°ÏÃö´ç¨½	¶À¬ö¶Q	»O¥_¥«¥_§ë°ÏÃö´ç¨½¶À¬ö¶Q	2	1	1960	µLÄÒÄy¤Î¥¼¸g¬FÄÒ±ÀÂË	0	0	1732	0.2798	0	0	3	KMT	0	0.18165029	0.34045254	2.937266968	»O¥_¥«¥_§ë°ÏÃö´ç¨½
»O¥_¥«¥_§ë°ÏÃö´ç¨½	¬öªQÅb	»O¥_¥«¥_§ë°ÏÃö´ç¨½¬öªQÅb	3	1	1961	µLÄÒÄy¤Î¥¼¸g¬FÄÒ±ÀÂË	0	0	2466	0.3985	1	1	3	KMT	0	0.34045254	0.34045254	2.937266968	»O¥_¥«¥_§ë°ÏÃö´ç¨½
»O¥_¥«¥_§ë°Ï¬u·½¨½	³¯§Ó¦¨	»O¥_¥«¥_§ë°Ï¬u·½¨½³¯§Ó¦¨	1	1	1964	¤¤°ê°ê¥ÁÄÒ	1	0	1260	1	1	1	1	KMT	0	1	1	1	»O¥_¥«¥_§ë°Ï¬u·½¨½
»O¥_¥«¥_§ë°Ï´ò¤s¨½	§d¤åµØ	»O¥_¥«¥_§ë°Ï´ò¤s¨½§d¤åµØ	1	1	1935	µLÄÒÄy¤Î¥¼¸g¬FÄÒ±ÀÂË	0	0	335	0.2732	0	1	3	KMT	0	0.07463824	0.37691081	2.653147571	»O¥_¥«¥_§ë°Ï´ò¤s¨½
»O¥_¥«¥_§ë°Ï´ò¤s¨½	³¯¤å¶i	»O¥_¥«¥_§ë°Ï´ò¤s¨½³¯¤å¶i	2	1	1955	µLÄÒÄy¤Î¥¼¸g¬FÄÒ±ÀÂË	0	0	276	0.2251	0	0	3	KMT	0	0.12530825	0.37691081	2.653147571	»O¥_¥«¥_§ë°Ï´ò¤s¨½
»O¥_¥«¥_§ë°Ï´ò¤s¨½	§õ¬îÁø	»O¥_¥«¥_§ë°Ï´ò¤s¨½§õ¬îÁø	3	0	1957	¤¤°ê°ê¥ÁÄÒ	1	0	615	0.5016	1	0	3	KMT	0	0.37691081	0.37691081	2.653147571	»O¥_¥«¥_§ë°Ï´ò¤s¨½
»O¥_¥«¥_§ë°Ï¤j¤Ù¨½	¶Ôºa½÷	»O¥_¥«¥_§ë°Ï¤j¤Ù¨½¶Ôºa½÷	1	1	1966	µLÄÒÄy¤Î¥¼¸g¬FÄÒ±ÀÂË	0	0	414	0.5498	1	1	2	KMT	0	0.30228004	0.50487005	1.980707709	»O¥_¥«¥_§ë°Ï¤j¤Ù¨½
»O¥_¥«¥_§ë°Ï¤j¤Ù¨½	³¯²M·½	»O¥_¥«¥_§ë°Ï¤j¤Ù¨½³¯²M·½	2	1	1956	µLÄÒÄy¤Î¥¼¸g¬FÄÒ±ÀÂË	0	0	339	0.4501	0	0	2	KMT	0	0.50487005	0.50487005	1.980707709	»O¥_¥«¥_§ë°Ï¤j¤Ù¨½
»O¥_¥«¥_§ë°Ï´ò¥Ð¨½	±ä©÷¥¿	»O¥_¥«¥_§ë°Ï´ò¥Ð¨½±ä©÷¥¿	1	1	1971	µLÄÒÄy¤Î¥¼¸g¬FÄÒ±ÀÂË	0	0	423	0.5472	1	1	2	KMT	0	0.29942784	0.50436513	1.982690596	»O¥_¥«¥_§ë°Ï´ò¥Ð¨½
»O¥_¥«¥_§ë°Ï´ò¥Ð¨½	¥Õ«T	»O¥_¥«¥_§ë°Ï´ò¥Ð¨½¥Õ«T	2	1	1955	µLÄÒÄy¤Î¥¼¸g¬FÄÒ±ÀÂË	0	0	350	0.4527	0	0	2	KMT	0	0.50436513	0.50436513	1.982690596	»O¥_¥«¥_§ë°Ï´ò¥Ð¨½
»O¥_¥«¤hªL°Ï¤¯«i¨½	³¯¨qµ^	»O¥_¥«¤hªL°Ï¤¯«i¨½³¯¨qµ^	1	0	1956	µLÄÒÄy¤Î¥¼¸g¬FÄÒ±ÀÂË	0	0	853	0.3623	0	0	2	KMT	0	0.13126129	0.53779505	1.859444411	»O¥_¥«¤hªL°Ï¤¯«i¨½
»O¥_¥«¤hªL°Ï¤¯«i¨½	¬x»ÊÂí	»O¥_¥«¤hªL°Ï¤¯«i¨½¬x»ÊÂí	2	1	1955	µLÄÒÄy¤Î¥¼¸g¬FÄÒ±ÀÂË	0	0	1501	0.6376	1	0	2	KMT	0	0.53779505	0.53779505	1.859444411	»O¥_¥«¤hªL°Ï¤¯«i¨½
»O¥_¥«¤hªL°Ï¸q«H¨½	³¯¤¤©M	»O¥_¥«¤hªL°Ï¸q«H¨½³¯¤¤©M	1	1	1953	¤¤°ê°ê¥ÁÄÒ	1	0	1689	1	1	1	1	KMT	0	1	1	1	»O¥_¥«¤hªL°Ï¸q«H¨½
»O¥_¥«¤hªL°ÏºÖªL¨½	¦¿¬ü¯]	»O¥_¥«¤hªL°ÏºÖªL¨½¦¿¬ü¯]	1	0	1956	µLÄÒÄy¤Î¥¼¸g¬FÄÒ±ÀÂË	0	0	1078	0.6177	1	1	2	KMT	0	0.38155329	0.52763013	1.89526705	»O¥_¥«¤hªL°ÏºÖªL¨½
»O¥_¥«¤hªL°ÏºÖªL¨½	³¯§Ó©÷	»O¥_¥«¤hªL°ÏºÖªL¨½³¯§Ó©÷	2	1	1960	µLÄÒÄy¤Î¥¼¸g¬FÄÒ±ÀÂË	0	0	667	0.3822	0	0	2	KMT	0	0.52763013	0.52763013	1.89526705	»O¥_¥«¤hªL°ÏºÖªL¨½
»O¥_¥«¤hªL°ÏºÖ¼w¨½	·¨ÀA©v	»O¥_¥«¤hªL°ÏºÖ¼w¨½·¨ÀA©v	1	1	1952	¤¤°ê°ê¥ÁÄÒ	1	0	2158	1	1	1	1	KMT	0	1	1	1	»O¥_¥«¤hªL°ÏºÖ¼w¨½
»O¥_¥«¤hªL°ÏºÖ§Ó¨½	§õ¤é«n	»O¥_¥«¤hªL°ÏºÖ§Ó¨½§õ¤é«n	1	1	1934	¤¤°ê°ê¥ÁÄÒ	1	0	2112	0.479	0	1	2	KMT	0	0.229441	0.50077781	1.996893592	»O¥_¥«¤hªL°ÏºÖ§Ó¨½
»O¥_¥«¤hªL°ÏºÖ§Ó¨½	Áé¬K´I	»O¥_¥«¤hªL°ÏºÖ§Ó¨½Áé¬K´I	2	1	1956	µLÄÒÄy¤Î¥¼¸g¬FÄÒ±ÀÂË	0	0	2297	0.5209	1	0	2	KMT	0	0.50077781	0.50077781	1.996893592	»O¥_¥«¤hªL°ÏºÖ§Ó¨½
»O¥_¥«¤hªL°ÏÂÂ¨Î¨½	¦ó¶hªQ	»O¥_¥«¤hªL°ÏÂÂ¨Î¨½¦ó¶hªQ	1	1	1965	¤¤°ê°ê¥ÁÄÒ	1	0	2679	1	1	1	1	KMT	0	1	1	1	»O¥_¥«¤hªL°ÏÂÂ¨Î¨½
»O¥_¥«¤hªL°ÏºÖ¨Î¨½	¬x©ú¨k	»O¥_¥«¤hªL°ÏºÖ¨Î¨½¬x©ú¨k	1	1	1941	¤¤°ê°ê¥ÁÄÒ	1	0	1822	0.4237	0	0	2	KMT	0	0.17952169	0.51152813	1.954926702	»O¥_¥«¤hªL°ÏºÖ¨Î¨½
»O¥_¥«¤hªL°ÏºÖ¨Î¨½	­J­è¼Ý	»O¥_¥«¤hªL°ÏºÖ¨Î¨½­J­è¼Ý	2	1	1949	µLÄÒÄy¤Î¥¼¸g¬FÄÒ±ÀÂË	0	0	2478	0.5762	1	1	2	KMT	0	0.51152813	0.51152813	1.954926702	»O¥_¥«¤hªL°ÏºÖ¨Î¨½
»O¥_¥«¤hªL°Ï«á´ä¨½	½²©Ó¨É	»O¥_¥«¤hªL°Ï«á´ä¨½½²©Ó¨É	1	1	1960	µLÄÒÄy¤Î¥¼¸g¬FÄÒ±ÀÂË	0	0	1551	0.3351	0	0	3	KMT	0	0.11229201	0.33336953	2.999674265	»O¥_¥«¤hªL°Ï«á´ä¨½
»O¥_¥«¤hªL°Ï«á´ä¨½	·¨¸q²M	»O¥_¥«¤hªL°Ï«á´ä¨½·¨¸q²M	2	1	1942	¤¤°ê°ê¥ÁÄÒ	1	0	1571	0.3394	1	1	3	KMT	0	0.22748437	0.33336953	2.999674265	»O¥_¥«¤hªL°Ï«á´ä¨½
»O¥_¥«¤hªL°Ï«á´ä¨½	¬ö«Øº~	»O¥_¥«¤hªL°Ï«á´ä¨½¬ö«Øº~	3	1	1982	¥Á¥D¶i¨BÄÒ	0	1	1506	0.3254	0	0	3	KMT	0	0.33336953	0.33336953	2.999674265	»O¥_¥«¤hªL°Ï«á´ä¨½
»O¥_¥«¤hªL°ÏºÖ¤¤¨½	¦¿ÁÂÂ²ª÷¥É	»O¥_¥«¤hªL°ÏºÖ¤¤¨½¦¿ÁÂÂ²ª÷¥É	1	0	1949	µLÄÒÄy¤Î¥¼¸g¬FÄÒ±ÀÂË	0	0	873	0.2246	0	0	3	KMT	0	0.05044516	0.36718476	2.723424578	»O¥_¥«¤hªL°ÏºÖ¤¤¨½
»O¥_¥«¤hªL°ÏºÖ¤¤¨½	³¯´Ë¤ì	»O¥_¥«¤hªL°ÏºÖ¤¤¨½³¯´Ë¤ì	2	1	1949	¤¤°ê°ê¥ÁÄÒ	1	0	1156	0.2974	0	1	3	KMT	0	0.13889192	0.36718476	2.723424578	»O¥_¥«¤hªL°ÏºÖ¤¤¨½
»O¥_¥«¤hªL°ÏºÖ¤¤¨½	¬öºaÂE	»O¥_¥«¤hªL°ÏºÖ¤¤¨½¬öºaÂE	3	1	1956	¥Á¥D¶i¨BÄÒ	0	1	1857	0.4778	1	0	3	KMT	0	0.36718476	0.36718476	2.723424578	»O¥_¥«¤hªL°ÏºÖ¤¤¨½
»O¥_¥«¤hªL°Ï«e´ä¨½	±iÂí¬v	»O¥_¥«¤hªL°Ï«e´ä¨½±iÂí¬v	1	1	1953	¤¤°ê°ê¥ÁÄÒ	1	0	515	0.1958	0	1	4	KMT	0	0.03833764	0.28981452	3.450482743	»O¥_¥«¤hªL°Ï«e´ä¨½
»O¥_¥«¤hªL°Ï«e´ä¨½	°ª¥É­ë	»O¥_¥«¤hªL°Ï«e´ä¨½°ª¥É­ë	2	0	1966	µLÄÒÄy¤Î¥¼¸g¬FÄÒ±ÀÂË	0	0	310	0.1178	0	0	4	KMT	0	0.05221448	0.28981452	3.450482743	»O¥_¥«¤hªL°Ï«e´ä¨½
»O¥_¥«¤hªL°Ï«e´ä¨½	¬ö§Ó²»	»O¥_¥«¤hªL°Ï«e´ä¨½¬ö§Ó²»	3	1	1964	µLÄÒÄy¤Î¥¼¸g¬FÄÒ±ÀÂË	0	0	816	0.3102	0	0	4	KMT	0	0.14843852	0.28981452	3.450482743	»O¥_¥«¤hªL°Ï«e´ä¨½
»O¥_¥«¤hªL°Ï«e´ä¨½	³¯·çµØ	»O¥_¥«¤hªL°Ï«e´ä¨½³¯·çµØ	4	0	1958	µLÄÒÄy¤Î¥¼¸g¬FÄÒ±ÀÂË	0	0	989	0.376	1	0	4	KMT	0	0.28981452	0.28981452	3.450482743	»O¥_¥«¤hªL°Ï«e´ä¨½
»O¥_¥«¤hªL°Ï¦ÊÄÖ¨½	·¨¦A¥Í	»O¥_¥«¤hªL°Ï¦ÊÄÖ¨½·¨¦A¥Í	1	1	1958	µLÄÒÄy¤Î¥¼¸g¬FÄÒ±ÀÂË	0	0	490	0.1132	0	0	4	KMT	0	0.01281424	0.33723994	2.965247829	»O¥_¥«¤hªL°Ï¦ÊÄÖ¨½
»O¥_¥«¤hªL°Ï¦ÊÄÖ¨½	§õ¹Å¾§	»O¥_¥«¤hªL°Ï¦ÊÄÖ¨½§õ¹Å¾§	2	1	1963	¤¤°ê°ê¥ÁÄÒ	1	0	1676	0.3872	0	0	4	KMT	0	0.16273808	0.33723994	2.965247829	»O¥_¥«¤hªL°Ï¦ÊÄÖ¨½
»O¥_¥«¤hªL°Ï¦ÊÄÖ¨½	§õÄR±ö	»O¥_¥«¤hªL°Ï¦ÊÄÖ¨½§õÄR±ö	3	0	1959	µLÄÒÄy¤Î¥¼¸g¬FÄÒ±ÀÂË	0	0	398	0.0919	0	0	4	KMT	0	0.17118369	0.33723994	2.965247829	»O¥_¥«¤hªL°Ï¦ÊÄÖ¨½
»O¥_¥«¤hªL°Ï¦ÊÄÖ¨½	¯Î²Q¿o	»O¥_¥«¤hªL°Ï¦ÊÄÖ¨½¯Î²Q¿o	4	0	1980	¥Á¥D¶i¨BÄÒ	0	1	1764	0.4075	1	0	4	KMT	0	0.33723994	0.33723994	2.965247829	»O¥_¥«¤hªL°Ï¦ÊÄÖ¨½
»O¥_¥«¤hªL°Ï©Ó¼w¨½	³¯­³¥ú	»O¥_¥«¤hªL°Ï©Ó¼w¨½³¯­³¥ú	1	1	1953	µLÄÒÄy¤Î¥¼¸g¬FÄÒ±ÀÂË	0	0	991	0.3117	0	0	3	KMT	0	0.09715689	0.35436851	2.821921169	»O¥_¥«¤hªL°Ï©Ó¼w¨½
»O¥_¥«¤hªL°Ï©Ó¼w¨½	À¹°·¤@	»O¥_¥«¤hªL°Ï©Ó¼w¨½À¹°·¤@	2	1	1941	µLÄÒÄy¤Î¥¼¸g¬FÄÒ±ÀÂË	0	0	773	0.2431	0	0	3	KMT	0	0.1562545	0.35436851	2.821921169	»O¥_¥«¤hªL°Ï©Ó¼w¨½
»O¥_¥«¤hªL°Ï©Ó¼w¨½	³¯¬w¥­	»O¥_¥«¤hªL°Ï©Ó¼w¨½³¯¬w¥­	3	1	1947	¤¤°ê°ê¥ÁÄÒ	1	0	1415	0.4451	1	1	3	KMT	0	0.35436851	0.35436851	2.821921169	»O¥_¥«¤hªL°Ï©Ó¼w¨½
»O¥_¥«¤hªL°ÏºÖµØ¨½	§õ®¶¶Q	»O¥_¥«¤hªL°ÏºÖµØ¨½§õ®¶¶Q	1	1	1951	µLÄÒÄy¤Î¥¼¸g¬FÄÒ±ÀÂË	0	0	2258	0.6003	1	1	3	KMT	0	0.36036009	0.45089134	2.217829245	»O¥_¥«¤hªL°ÏºÖµØ¨½
»O¥_¥«¤hªL°ÏºÖµØ¨½	§fºaµØ	»O¥_¥«¤hªL°ÏºÖµØ¨½§fºaµØ	2	1	1952	¤¤°ê°ê¥ÁÄÒ	1	0	1027	0.273	0	0	3	KMT	0	0.43488909	0.45089134	2.217829245	»O¥_¥«¤hªL°ÏºÖµØ¨½
»O¥_¥«¤hªL°ÏºÖµØ¨½	¿à¤Ñ¨Ó	»O¥_¥«¤hªL°ÏºÖµØ¨½¿à¤Ñ¨Ó	3	1	1956	¤¤°ê°ê¥ÁÄÒ	1	0	476	0.1265	0	0	3	KMT	0	0.45089134	0.45089134	2.217829245	»O¥_¥«¤hªL°ÏºÖµØ¨½
»O¥_¥«¤hªL°Ï©ú³Ó¨½	³¯ª÷ÑÛ	»O¥_¥«¤hªL°Ï©ú³Ó¨½³¯ª÷ÑÛ	1	1	1956	µLÄÒÄy¤Î¥¼¸g¬FÄÒ±ÀÂË	0	0	85	0.0293	0	0	4	KMT	0	0.00085849	0.33033486	3.027231216	»O¥_¥«¤hªL°Ï©ú³Ó¨½
»O¥_¥«¤hªL°Ï©ú³Ó¨½	À¹·ç¶³	»O¥_¥«¤hªL°Ï©ú³Ó¨½À¹·ç¶³	2	0	1952	µLÄÒÄy¤Î¥¼¸g¬FÄÒ±ÀÂË	0	0	1181	0.4076	1	1	4	KMT	0	0.16699625	0.33033486	3.027231216	»O¥_¥«¤hªL°Ï©ú³Ó¨½
»O¥_¥«¤hªL°Ï©ú³Ó¨½	±i¥Ã´É	»O¥_¥«¤hªL°Ï©ú³Ó¨½±i¥Ã´É	3	1	1959	µLÄÒÄy¤Î¥¼¸g¬FÄÒ±ÀÂË	0	0	959	0.331	0	0	4	KMT	0	0.27655725	0.33033486	3.027231216	»O¥_¥«¤hªL°Ï©ú³Ó¨½
»O¥_¥«¤hªL°Ï©ú³Ó¨½	¶À±R®¦	»O¥_¥«¤hªL°Ï©ú³Ó¨½¶À±R®¦	4	1	1958	¥Á¥D¶i¨BÄÒ	0	1	672	0.2319	0	0	4	KMT	0	0.33033486	0.33033486	3.027231216	»O¥_¥«¤hªL°Ï©ú³Ó¨½
»O¥_¥«¤hªL°ÏºÖ¶¶¨½	³¯§Ó¸Û	»O¥_¥«¤hªL°ÏºÖ¶¶¨½³¯§Ó¸Û	1	1	1962	µLÄÒÄy¤Î¥¼¸g¬FÄÒ±ÀÂË	0	0	1310	0.446	1	0	3	KMT	0	0.198916	0.36600804	2.732180419	»O¥_¥«¤hªL°ÏºÖ¶¶¨½
»O¥_¥«¤hªL°ÏºÖ¶¶¨½	¥Ð²K¤B	»O¥_¥«¤hªL°ÏºÖ¶¶¨½¥Ð²K¤B	2	1	1965	µLÄÒÄy¤Î¥¼¸g¬FÄÒ±ÀÂË	0	0	570	0.194	0	0	3	KMT	0	0.236552	0.36600804	2.732180419	»O¥_¥«¤hªL°ÏºÖ¶¶¨½
»O¥_¥«¤hªL°ÏºÖ¶¶¨½	³¯´Iºa	»O¥_¥«¤hªL°ÏºÖ¶¶¨½³¯´Iºa	3	1	1946	¥Á¥D¶i¨BÄÒ	0	1	1057	0.3598	0	1	3	KMT	0	0.36600804	0.36600804	2.732180419	»O¥_¥«¤hªL°ÏºÖ¶¶¨½
»O¥_¥«¤hªL°Ï´I¥ú¨½	­ð¥ú§»	»O¥_¥«¤hªL°Ï´I¥ú¨½­ð¥ú§»	1	1	1967	¤¤°ê°ê¥ÁÄÒ	1	0	939	0.283	0	0	2	KMT	0	0.080089	0.59403461	1.683403598	»O¥_¥«¤hªL°Ï´I¥ú¨½
»O¥_¥«¤hªL°Ï´I¥ú¨½	³\®¶³q	»O¥_¥«¤hªL°Ï´I¥ú¨½³\®¶³q	2	1	1961	¥Á¥D¶i¨BÄÒ	0	1	2378	0.7169	1	1	2	KMT	0	0.59403461	0.59403461	1.683403598	»O¥_¥«¤hªL°Ï´I¥ú¨½
»O¥_¥«¤hªL°Ï¸¬Äª¨½	³¢¤@¬î	»O¥_¥«¤hªL°Ï¸¬Äª¨½³¢¤@¬î	1	1	1954	¤¤°ê°ê¥ÁÄÒ	1	0	1479	0.3303	0	0	2	KMT	0	0.10909809	0.55746225	1.79384344	»O¥_¥«¤hªL°Ï¸¬Äª¨½
»O¥_¥«¤hªL°Ï¸¬Äª¨½	³\®¶Â§	»O¥_¥«¤hªL°Ï¸¬Äª¨½³\®¶Â§	2	1	1963	µLÄÒÄy¤Î¥¼¸g¬FÄÒ±ÀÂË	0	0	2998	0.6696	1	1	2	KMT	0	0.55746225	0.55746225	1.79384344	»O¥_¥«¤hªL°Ï¸¬Äª¨½
»O¥_¥«¤hªL°Ï¸¬ªF¨½	§õ¥ÉªK	»O¥_¥«¤hªL°Ï¸¬ªF¨½§õ¥ÉªK	1	0	1948	µLÄÒÄy¤Î¥¼¸g¬FÄÒ±ÀÂË	0	0	862	0.3856	0	0	2	KMT	0	0.14868736	0.52605185	1.9009533	»O¥_¥«¤hªL°Ï¸¬ªF¨½
»O¥_¥«¤hªL°Ï¸¬ªF¨½	³¢²Q¬Â	»O¥_¥«¤hªL°Ï¸¬ªF¨½³¢²Q¬Â	2	0	1964	µLÄÒÄy¤Î¥¼¸g¬FÄÒ±ÀÂË	0	0	1373	0.6143	1	1	2	KMT	0	0.52605185	0.52605185	1.9009533	»O¥_¥«¤hªL°Ï¸¬ªF¨½
»O¥_¥«¤hªL°ÏªÀ¤l¨½	³¯©ú¶¯	»O¥_¥«¤hªL°ÏªÀ¤l¨½³¯©ú¶¯	1	1	1941	¤¤°ê°ê¥ÁÄÒ	1	0	1842	0.5191	1	1	2	KMT	0	0.26946481	0.50063345	1.997469406	»O¥_¥«¤hªL°ÏªÀ¤l¨½
»O¥_¥«¤hªL°ÏªÀ¤l¨½	³¯¥Á°®	»O¥_¥«¤hªL°ÏªÀ¤l¨½³¯¥Á°®	2	1	1961	µLÄÒÄy¤Î¥¼¸g¬FÄÒ±ÀÂË	0	0	1706	0.4808	0	0	2	KMT	0	0.50063345	0.50063345	1.997469406	»O¥_¥«¤hªL°ÏªÀ¤l¨½
»O¥_¥«¤hªL°ÏªÀ·s¨½	¦¿¼z½¬	»O¥_¥«¤hªL°ÏªÀ·s¨½¦¿¼z½¬	1	0	1957	¤¤°ê°ê¥ÁÄÒ	1	0	1880	0.376	0	0	3	KMT	0	0.141376	0.3758706	2.660490073	»O¥_¥«¤hªL°ÏªÀ·s¨½
»O¥_¥«¤hªL°ÏªÀ·s¨½	±iÂ@«Û	»O¥_¥«¤hªL°ÏªÀ·s¨½±iÂ@«Û	2	1	1970	µLÄÒÄy¤Î¥¼¸g¬FÄÒ±ÀÂË	0	0	853	0.1706	0	0	3	KMT	0	0.17048036	0.3758706	2.660490073	»O¥_¥«¤hªL°ÏªÀ·s¨½
»O¥_¥«¤hªL°ÏªÀ·s¨½	³¯§Ó©ú	»O¥_¥«¤hªL°ÏªÀ·s¨½³¯§Ó©ú	3	1	1967	¥Á¥D¶i¨BÄÒ	0	1	2266	0.4532	1	1	3	KMT	0	0.3758706	0.3758706	2.660490073	»O¥_¥«¤hªL°ÏªÀ·s¨½
»O¥_¥«¤hªL°ÏªÀ¶é¨½	³¯©w¶¯	»O¥_¥«¤hªL°ÏªÀ¶é¨½³¯©w¶¯	1	1	1945	¤¤°ê°ê¥ÁÄÒ	1	0	2091	0.4724	0	1	2	KMT	0	0.22316176	0.50141801	1.994344001	»O¥_¥«¤hªL°ÏªÀ¶é¨½
»O¥_¥«¤hªL°ÏªÀ¶é¨½	¸­¤lªå	»O¥_¥«¤hªL°ÏªÀ¶é¨½¸­¤lªå	2	0	1972	µLÄÒÄy¤Î¥¼¸g¬FÄÒ±ÀÂË	0	0	2335	0.5275	1	0	2	KMT	0	0.50141801	0.50141801	1.994344001	»O¥_¥«¤hªL°ÏªÀ¶é¨½
»O¥_¥«¤hªL°Ï¥Ã­Û¨½	§º¦°Â`	»O¥_¥«¤hªL°Ï¥Ã­Û¨½§º¦°Â`	1	1	1948	µLÄÒÄy¤Î¥¼¸g¬FÄÒ±ÀÂË	0	0	2641	0.5964	1	1	3	KMT	0	0.35569296	0.50164733	1.993432318	»O¥_¥«¤hªL°Ï¥Ã­Û¨½
»O¥_¥«¤hªL°Ï¥Ã­Û¨½	§õ¼y©÷	»O¥_¥«¤hªL°Ï¥Ã­Û¨½§õ¼y©÷	2	1	1958	µLÄÒÄy¤Î¥¼¸g¬FÄÒ±ÀÂË	0	0	98	0.0221	0	0	3	KMT	0	0.35618137	0.50164733	1.993432318	»O¥_¥«¤hªL°Ï¥Ã­Û¨½
»O¥_¥«¤hªL°Ï¥Ã­Û¨½	§õ¬î»ñ	»O¥_¥«¤hªL°Ï¥Ã­Û¨½§õ¬î»ñ	3	0	1956	µLÄÒÄy¤Î¥¼¸g¬FÄÒ±ÀÂË	0	0	1689	0.3814	0	0	3	KMT	0	0.50164733	0.50164733	1.993432318	»O¥_¥«¤hªL°Ï¥Ã­Û¨½
»O¥_¥«¤hªL°ÏºÖ¦w¨½	¤ýºÖ¨Ó	»O¥_¥«¤hªL°ÏºÖ¦w¨½¤ýºÖ¨Ó	1	1	1953	µLÄÒÄy¤Î¥¼¸g¬FÄÒ±ÀÂË	0	0	1156	0.3781	0	0	2	KMT	0	0.14295961	0.52959485	1.888235884	»O¥_¥«¤hªL°ÏºÖ¦w¨½
»O¥_¥«¤hªL°ÏºÖ¦w¨½	ÁÂ¤å¥[	»O¥_¥«¤hªL°ÏºÖ¦w¨½ÁÂ¤å¥[	2	1	1957	¥Á¥D¶i¨BÄÒ	0	1	1901	0.6218	1	1	2	KMT	0	0.52959485	0.52959485	1.888235884	»O¥_¥«¤hªL°ÏºÖ¦w¨½
»O¥_¥«¤hªL°Ï´I¬w¨½	ªL®¶¨Ó	»O¥_¥«¤hªL°Ï´I¬w¨½ªL®¶¨Ó	1	1	1955	µLÄÒÄy¤Î¥¼¸g¬FÄÒ±ÀÂË	0	0	1529	0.4217	0	0	2	KMT	0	0.17783089	0.51214613	1.952567717	»O¥_¥«¤hªL°Ï´I¬w¨½
»O¥_¥«¤hªL°Ï´I¬w¨½	§õ½çºÖ	»O¥_¥«¤hªL°Ï´I¬w¨½§õ½çºÖ	2	1	1960	µLÄÒÄy¤Î¥¼¸g¬FÄÒ±ÀÂË	0	0	2096	0.5782	1	0	2	KMT	0	0.51214613	0.51214613	1.952567717	»O¥_¥«¤hªL°Ï´I¬w¨½
»O¥_¥«¤hªL°Ï©¥¤s¨½	±ä©÷¶©	»O¥_¥«¤hªL°Ï©¥¤s¨½±ä©÷¶©	1	1	1960	¤¤°ê°ê¥ÁÄÒ	1	0	1571	1	1	1	1	KMT	0	1	1	1	»O¥_¥«¤hªL°Ï©¥¤s¨½
»O¥_¥«¤hªL°Ï¦W¤s¨½	¹ù©¨	»O¥_¥«¤hªL°Ï¦W¤s¨½¹ù©¨	1	1	1954	µLÄÒÄy¤Î¥¼¸g¬FÄÒ±ÀÂË	0	0	2179	0.5178	1	1	2	KMT	0	0.26811684	0.50053725	1.997853307	»O¥_¥«¤hªL°Ï¦W¤s¨½
»O¥_¥«¤hªL°Ï¦W¤s¨½	½²®a¿³	»O¥_¥«¤hªL°Ï¦W¤s¨½½²®a¿³	2	1	1957	¤¤°ê°ê¥ÁÄÒ	1	0	2029	0.4821	0	0	2	KMT	0	0.50053725	0.50053725	1.997853307	»O¥_¥«¤hªL°Ï¦W¤s¨½
»O¥_¥«¤hªL°Ï¼w¦æ¨½	§d©v¤H	»O¥_¥«¤hªL°Ï¼w¦æ¨½§d©v¤H	1	1	1974	µLÄÒÄy¤Î¥¼¸g¬FÄÒ±ÀÂË	0	0	1253	0.5141	1	1	2	KMT	0	0.26429881	0.50030045	1.998798922	»O¥_¥«¤hªL°Ï¼w¦æ¨½
»O¥_¥«¤hªL°Ï¼w¦æ¨½	Â²¶¶©÷	»O¥_¥«¤hªL°Ï¼w¦æ¨½Â²¶¶©÷	2	1	1958	µLÄÒÄy¤Î¥¼¸g¬FÄÒ±ÀÂË	0	0	1184	0.4858	0	0	2	KMT	0	0.50030045	0.50030045	1.998798922	»O¥_¥«¤hªL°Ï¼w¦æ¨½
»O¥_¥«¤hªL°Ï¼wµØ¨½	ªL¥Í½å	»O¥_¥«¤hªL°Ï¼wµØ¨½ªL¥Í½å	1	1	1956	µLÄÒÄy¤Î¥¼¸g¬FÄÒ±ÀÂË	0	0	1653	0.5092	1	0	2	KMT	0	0.25928464	0.50007113	1.99971552	»O¥_¥«¤hªL°Ï¼wµØ¨½
»O¥_¥«¤hªL°Ï¼wµØ¨½	³¯³Ó¶Ç	»O¥_¥«¤hªL°Ï¼wµØ¨½³¯³Ó¶Ç	2	1	1945	µLÄÒÄy¤Î¥¼¸g¬FÄÒ±ÀÂË	0	0	1593	0.4907	0	1	2	KMT	0	0.50007113	0.50007113	1.99971552	»O¥_¥«¤hªL°Ï¼wµØ¨½
»O¥_¥«¤hªL°Ï¸t¤s¨½	¼ï¯Î¥É¿P	»O¥_¥«¤hªL°Ï¸t¤s¨½¼ï¯Î¥É¿P	1	0	1951	µLÄÒÄy¤Î¥¼¸g¬FÄÒ±ÀÂË	0	0	151	0.0532	0	0	4	KMT	0	0.00283024	0.31555318	3.169037942	»O¥_¥«¤hªL°Ï¸t¤s¨½
»O¥_¥«¤hªL°Ï¸t¤s¨½	®]ápÁ¾	»O¥_¥«¤hªL°Ï¸t¤s¨½®]ápÁ¾	2	0	1967	µLÄÒÄy¤Î¥¼¸g¬FÄÒ±ÀÂË	0	0	641	0.2261	0	0	4	KMT	0	0.05395145	0.31555318	3.169037942	»O¥_¥«¤hªL°Ï¸t¤s¨½
»O¥_¥«¤hªL°Ï¸t¤s¨½	³\ºa§ø	»O¥_¥«¤hªL°Ï¸t¤s¨½³\ºa§ø	3	1	1954	¤¤°ê°ê¥ÁÄÒ	1	0	1112	0.3922	1	1	4	KMT	0	0.20777229	0.31555318	3.169037942	»O¥_¥«¤hªL°Ï¸t¤s¨½
»O¥_¥«¤hªL°Ï¸t¤s¨½	§d¤T«i	»O¥_¥«¤hªL°Ï¸t¤s¨½§d¤T«i	4	1	1951	µLÄÒÄy¤Î¥¼¸g¬FÄÒ±ÀÂË	0	0	931	0.3283	0	0	4	KMT	0	0.31555318	0.31555318	3.169037942	»O¥_¥«¤hªL°Ï¸t¤s¨½
»O¥_¥«¤hªL°Ï©¾¸Û¨½	´¿©[¨Ó	»O¥_¥«¤hªL°Ï©¾¸Û¨½´¿©[¨Ó	1	1	1954	¤¤°ê°ê¥ÁÄÒ	1	0	2712	1	1	1	1	KMT	0	1	1	1	»O¥_¥«¤hªL°Ï©¾¸Û¨½
»O¥_¥«¤hªL°ÏªÛ¤s¨½	³¯­Z¼w	»O¥_¥«¤hªL°ÏªÛ¤s¨½³¯­Z¼w	1	1	1949	µLÄÒÄy¤Î¥¼¸g¬FÄÒ±ÀÂË	0	0	407	0.0972	0	0	3	KMT	0	0.00944784	0.41702093	2.397961177	»O¥_¥«¤hªL°ÏªÛ¤s¨½
»O¥_¥«¤hªL°ÏªÛ¤s¨½	ÃQ¶®­§	»O¥_¥«¤hªL°ÏªÛ¤s¨½ÃQ¶®­§	2	1	1953	µLÄÒÄy¤Î¥¼¸g¬FÄÒ±ÀÂË	0	0	1925	0.4597	1	1	3	KMT	0	0.22077193	0.41702093	2.397961177	»O¥_¥«¤hªL°ÏªÛ¤s¨½
»O¥_¥«¤hªL°ÏªÛ¤s¨½	ªL¥[©ô	»O¥_¥«¤hªL°ÏªÛ¤s¨½ªL¥[©ô	3	1	1948	µLÄÒÄy¤Î¥¼¸g¬FÄÒ±ÀÂË	0	0	1855	0.443	0	0	3	KMT	0	0.41702093	0.41702093	2.397961177	»O¥_¥«¤hªL°ÏªÛ¤s¨½
»O¥_¥«¤hªL°ÏªF¤s¨½	ªL»ö¼ä	»O¥_¥«¤hªL°ÏªF¤s¨½ªL»ö¼ä	1	0	1975	µLÄÒÄy¤Î¥¼¸g¬FÄÒ±ÀÂË	0	0	476	0.1568	0	0	4	KMT	0	0.02458624	0.3220101	3.105492654	»O¥_¥«¤hªL°ÏªF¤s¨½
»O¥_¥«¤hªL°ÏªF¤s¨½	¦ó¸t¤å	»O¥_¥«¤hªL°ÏªF¤s¨½¦ó¸t¤å	2	1	1976	µLÄÒÄy¤Î¥¼¸g¬FÄÒ±ÀÂË	0	0	1181	0.3891	1	0	4	KMT	0	0.17598505	0.3220101	3.105492654	»O¥_¥«¤hªL°ÏªF¤s¨½
»O¥_¥«¤hªL°ÏªF¤s¨½	§d©úã¸	»O¥_¥«¤hªL°ÏªF¤s¨½§d©úã¸	3	0	1944	¤¤°ê°ê¥ÁÄÒ	1	0	1134	0.3736	0	0	4	KMT	0	0.31556201	0.3220101	3.105492654	»O¥_¥«¤hªL°ÏªF¤s¨½
»O¥_¥«¤hªL°ÏªF¤s¨½	¯Î¨q­ë	»O¥_¥«¤hªL°ÏªF¤s¨½¯Î¨q­ë	4	0	1951	µLÄÒÄy¤Î¥¼¸g¬FÄÒ±ÀÂË	0	0	244	0.0803	0	0	4	KMT	0	0.3220101	0.3220101	3.105492654	»O¥_¥«¤hªL°ÏªF¤s¨½
»O¥_¥«¤hªL°Ï¤T¥É¨½	Ã¹§Ó³Ç	»O¥_¥«¤hªL°Ï¤T¥É¨½Ã¹§Ó³Ç	1	1	1966	¤¤°ê°ê¥ÁÄÒ	1	0	1651	0.5	1	1	3	KMT	0	0.25	0.42427941	2.356937378	»O¥_¥«¤hªL°Ï¤T¥É¨½
»O¥_¥«¤hªL°Ï¤T¥É¨½	±ç©ú¸t	»O¥_¥«¤hªL°Ï¤T¥É¨½±ç©ú¸t	2	1	1952	µLÄÒÄy¤Î¥¼¸g¬FÄÒ±ÀÂË	0	0	1344	0.407	0	0	3	KMT	0	0.415649	0.42427941	2.356937378	»O¥_¥«¤hªL°Ï¤T¥É¨½
»O¥_¥«¤hªL°Ï¤T¥É¨½	ÁÂ¬±®Ú	»O¥_¥«¤hªL°Ï¤T¥É¨½ÁÂ¬±®Ú	3	1	1950	µLÄÒÄy¤Î¥¼¸g¬FÄÒ±ÀÂË	0	0	307	0.0929	0	0	3	KMT	0	0.42427941	0.42427941	2.356937378	»O¥_¥«¤hªL°Ï¤T¥É¨½
»O¥_¥«¤hªL°ÏÄõ¶®¨½	¸U¤Ñºa	»O¥_¥«¤hªL°ÏÄõ¶®¨½¸U¤Ñºa	1	1	1951	¤¤°ê°ê¥ÁÄÒ	1	0	1857	0.3847	1	0	3	KMT	0	0.14799409	0.33735434	2.964242286	»O¥_¥«¤hªL°ÏÄõ¶®¨½
»O¥_¥«¤hªL°ÏÄõ¶®¨½	³¯¤ë»ñ	»O¥_¥«¤hªL°ÏÄõ¶®¨½³¯¤ë»ñ	2	0	1963	µLÄÒÄy¤Î¥¼¸g¬FÄÒ±ÀÂË	0	0	1438	0.2979	0	0	3	KMT	0	0.2367385	0.33735434	2.964242286	»O¥_¥«¤hªL°ÏÄõ¶®¨½
»O¥_¥«¤hªL°ÏÄõ¶®¨½	¿à¬îÂE	»O¥_¥«¤hªL°ÏÄõ¶®¨½¿à¬îÂE	3	1	1951	µLÄÒÄy¤Î¥¼¸g¬FÄÒ±ÀÂË	0	0	1531	0.3172	0	1	3	KMT	0	0.33735434	0.33735434	2.964242286	»O¥_¥«¤hªL°ÏÄõ¶®¨½
»O¥_¥«¤hªL°ÏÄõ¿³¨½	¼B¬î¤ô	»O¥_¥«¤hªL°ÏÄõ¿³¨½¼B¬î¤ô	1	1	1955	µLÄÒÄy¤Î¥¼¸g¬FÄÒ±ÀÂË	0	0	886	0.2424	0	0	3	KMT	0	0.05875776	0.37525562	2.664850163	»O¥_¥«¤hªL°ÏÄõ¿³¨½
»O¥_¥«¤hªL°ÏÄõ¿³¨½	ªô·sºa	»O¥_¥«¤hªL°ÏÄõ¿³¨½ªô·sºa	2	1	1952	¤¤°ê°ê¥ÁÄÒ	1	0	1829	0.5005	1	0	3	KMT	0	0.30925801	0.37525562	2.664850163	»O¥_¥«¤hªL°ÏÄõ¿³¨½
»O¥_¥«¤hªL°ÏÄõ¿³¨½	¿à²Mºa	»O¥_¥«¤hªL°ÏÄõ¿³¨½¿à²Mºa	3	1	1950	¥Á¥D¶i¨BÄÒ	0	1	939	0.2569	0	0	3	KMT	0	0.37525562	0.37525562	2.664850163	»O¥_¥«¤hªL°ÏÄõ¿³¨½
»O¥_¥«¤hªL°Ï¤ÑºÖ¨½	±ç¶¶¦¨	»O¥_¥«¤hªL°Ï¤ÑºÖ¨½±ç¶¶¦¨	1	1	1952	¤¤°ê°ê¥ÁÄÒ	1	0	1410	0.4085	0	0	2	KMT	0	0.16687225	0.51662621	1.935635437	»O¥_¥«¤hªL°Ï¤ÑºÖ¨½
»O¥_¥«¤hªL°Ï¤ÑºÖ¨½	¦¿±Ò«n	»O¥_¥«¤hªL°Ï¤ÑºÖ¨½¦¿±Ò«n	2	1	1951	µLÄÒÄy¤Î¥¼¸g¬FÄÒ±ÀÂË	0	0	2041	0.5914	1	1	2	KMT	0	0.51662621	0.51662621	1.935635437	»O¥_¥«¤hªL°Ï¤ÑºÖ¨½
»O¥_¥«¤hªL°Ï¤Ñ¸S¨½	ªL¨q²ú	»O¥_¥«¤hªL°Ï¤Ñ¸S¨½ªL¨q²ú	1	0	1966	µLÄÒÄy¤Î¥¼¸g¬FÄÒ±ÀÂË	0	0	544	0.1822	0	0	3	KMT	0	0.03319684	0.440241	2.271483119	»O¥_¥«¤hªL°Ï¤Ñ¸S¨½
»O¥_¥«¤hªL°Ï¤Ñ¸S¨½	½²ªø¿³	»O¥_¥«¤hªL°Ï¤Ñ¸S¨½½²ªø¿³	2	1	1961	¤¤°ê°ê¥ÁÄÒ	1	0	651	0.218	0	0	3	KMT	0	0.08072084	0.440241	2.271483119	»O¥_¥«¤hªL°Ï¤Ñ¸S¨½
»O¥_¥«¤hªL°Ï¤Ñ¸S¨½	§õÀA·é	»O¥_¥«¤hªL°Ï¤Ñ¸S¨½§õÀA·é	3	1	1962	µLÄÒÄy¤Î¥¼¸g¬FÄÒ±ÀÂË	0	0	1790	0.5996	1	1	3	KMT	0	0.440241	0.440241	2.271483119	»O¥_¥«¤hªL°Ï¤Ñ¸S¨½
»O¥_¥«¤hªL°Ï¤Ñ¹Ø¨½	¿½¦Ü©ú	»O¥_¥«¤hªL°Ï¤Ñ¹Ø¨½¿½¦Ü©ú	1	1	1965	¤¤°ê°ê¥ÁÄÒ	1	0	891	0.3244	0	0	2	KMT	0	0.10523536	0.56153561	1.780830961	»O¥_¥«¤hªL°Ï¤Ñ¹Ø¨½
»O¥_¥«¤hªL°Ï¤Ñ¹Ø¨½	³¯§B¦P	»O¥_¥«¤hªL°Ï¤Ñ¹Ø¨½³¯§B¦P	2	1	1958	µLÄÒÄy¤Î¥¼¸g¬FÄÒ±ÀÂË	0	0	1855	0.6755	1	1	2	KMT	0	0.56153561	0.56153561	1.780830961	»O¥_¥«¤hªL°Ï¤Ñ¹Ø¨½
»O¥_¥«¤hªL°Ï¤Ñ©M¨½	²øºÖ¨Ó	»O¥_¥«¤hªL°Ï¤Ñ©M¨½²øºÖ¨Ó	1	1	1947	¤¤°ê°ê¥ÁÄÒ	1	0	2282	0.5468	1	1	2	KMT	0	0.29899024	0.50428985	1.98298657	»O¥_¥«¤hªL°Ï¤Ñ©M¨½
»O¥_¥«¤hªL°Ï¤Ñ©M¨½	½²©úªQ	»O¥_¥«¤hªL°Ï¤Ñ©M¨½½²©úªQ	2	1	1948	µLÄÒÄy¤Î¥¼¸g¬FÄÒ±ÀÂË	0	0	1891	0.4531	0	0	2	KMT	0	0.50428985	0.50428985	1.98298657	»O¥_¥«¤hªL°Ï¤Ñ©M¨½
»O¥_¥«¤hªL°Ï¤Ñ¤s¨½	³¯¨ØµX	»O¥_¥«¤hªL°Ï¤Ñ¤s¨½³¯¨ØµX	1	0	1971	µLÄÒÄy¤Î¥¼¸g¬FÄÒ±ÀÂË	0	0	654	0.1751	0	0	3	KMT	0	0.03066001	0.37274118	2.682826727	»O¥_¥«¤hªL°Ï¤Ñ¤s¨½
»O¥_¥«¤hªL°Ï¤Ñ¤s¨½	ÃQ§±ã¸	»O¥_¥«¤hªL°Ï¤Ñ¤s¨½ÃQ§±ã¸	2	0	1961	µLÄÒÄy¤Î¥¼¸g¬FÄÒ±ÀÂË	0	0	1421	0.3806	0	0	3	KMT	0	0.17551637	0.37274118	2.682826727	»O¥_¥«¤hªL°Ï¤Ñ¤s¨½
»O¥_¥«¤hªL°Ï¤Ñ¤s¨½	±i²M±l	»O¥_¥«¤hªL°Ï¤Ñ¤s¨½±i²M±l	3	1	1950	¤¤°ê°ê¥ÁÄÒ	1	0	1658	0.4441	1	1	3	KMT	0	0.37274118	0.37274118	2.682826727	»O¥_¥«¤hªL°Ï¤Ñ¤s¨½
»O¥_¥«¤hªL°Ï¤Ñ¥É¨½	±`§BÁ¾	»O¥_¥«¤hªL°Ï¤Ñ¥É¨½±`§BÁ¾	1	1	1956	¤¤°ê°ê¥ÁÄÒ	1	0	2674	0.6145	1	1	2	KMT	0	0.37761025	0.52614341	1.900622494	»O¥_¥«¤hªL°Ï¤Ñ¥É¨½
»O¥_¥«¤hªL°Ï¤Ñ¥É¨½	±i¤å³s	»O¥_¥«¤hªL°Ï¤Ñ¥É¨½±i¤å³s	2	0	1941	µLÄÒÄy¤Î¥¼¸g¬FÄÒ±ÀÂË	0	0	1677	0.3854	0	0	2	KMT	0	0.52614341	0.52614341	1.900622494	»O¥_¥«¤hªL°Ï¤Ñ¥É¨½
»O¥_¥«¤hªL°Ï¤Ñ¥À¨½	§õ³¯µæ½¬	»O¥_¥«¤hªL°Ï¤Ñ¥À¨½§õ³¯µæ½¬	1	0	1948	µLÄÒÄy¤Î¥¼¸g¬FÄÒ±ÀÂË	0	0	1839	0.5001	1	0	2	KMT	0	0.25010001	0.49990005	2.00039988	»O¥_¥«¤hªL°Ï¤Ñ¥À¨½
»O¥_¥«¤hªL°Ï¤Ñ¥À¨½	ªLÅK¥Á	»O¥_¥«¤hªL°Ï¤Ñ¥À¨½ªLÅK¥Á	2	1	1948	¤¤°ê°ê¥ÁÄÒ	1	0	1838	0.4998	0	1	2	KMT	0	0.49990005	0.49990005	2.00039988	»O¥_¥«¤hªL°Ï¤Ñ¥À¨½
»O¥_¥«¤hªL°Ï¥ÃºÖ¨½	·¨¤å¶Q	»O¥_¥«¤hªL°Ï¥ÃºÖ¨½·¨¤å¶Q	1	1	1950	µLÄÒÄy¤Î¥¼¸g¬FÄÒ±ÀÂË	0	0	675	1	1	1	1	KMT	0	1	1	1	»O¥_¥«¤hªL°Ï¥ÃºÖ¨½
»O¥_¥«¤hªL°Ï¤½À]¨½	­S«T½å	»O¥_¥«¤hªL°Ï¤½À]¨½­S«T½å	1	1	1958	µLÄÒÄy¤Î¥¼¸g¬FÄÒ±ÀÂË	0	0	726	1	1	1	1	KMT	0	1	1	1	»O¥_¥«¤hªL°Ï¤½À]¨½
»O¥_¥«¤hªL°Ï·s¦w¨½	¦ó©ú´Ü	»O¥_¥«¤hªL°Ï·s¦w¨½¦ó©ú´Ü	1	1	1949	µLÄÒÄy¤Î¥¼¸g¬FÄÒ±ÀÂË	0	0	1118	1	1	1	1	KMT	0	1	1	1	»O¥_¥«¤hªL°Ï·s¦w¨½
»O¥_¥«¤hªL°Ï¶§©ú¨½	³¯«T¶¯	»O¥_¥«¤hªL°Ï¶§©ú¨½³¯«T¶¯	1	1	1970	µLÄÒÄy¤Î¥¼¸g¬FÄÒ±ÀÂË	0	0	292	0.1585	0	0	3	KMT	0	0.02512225	0.39555221	2.52811127	»O¥_¥«¤hªL°Ï¶§©ú¨½
»O¥_¥«¤hªL°Ï¶§©ú¨½	¶À¸Î­Ü	»O¥_¥«¤hªL°Ï¶§©ú¨½¶À¸Î­Ü	2	1	1956	¤¤°ê°ê¥ÁÄÒ	1	0	942	0.5114	1	1	3	KMT	0	0.28665221	0.39555221	2.52811127	»O¥_¥«¤hªL°Ï¶§©ú¨½
»O¥_¥«¤hªL°Ï¶§©ú¨½	¨¿¥@®Ú	»O¥_¥«¤hªL°Ï¶§©ú¨½¨¿¥@®Ú	3	1	1951	µLÄÒÄy¤Î¥¼¸g¬FÄÒ±ÀÂË	0	0	608	0.33	0	0	3	KMT	0	0.39555221	0.39555221	2.52811127	»O¥_¥«¤hªL°Ï¶§©ú¨½
»O¥_¥«¤hªL°Ïµ×¤s¨½	¦ó³Ó¨k	»O¥_¥«¤hªL°Ïµ×¤s¨½¦ó³Ó¨k	1	1	1939	µLÄÒÄy¤Î¥¼¸g¬FÄÒ±ÀÂË	0	0	842	1	1	1	1	KMT	0	1	1	1	»O¥_¥«¤hªL°Ïµ×¤s¨½
»O¥_¥«¤hªL°Ï¥­µ¥¨½	§õªa¾Ë	»O¥_¥«¤hªL°Ï¥­µ¥¨½§õªa¾Ë	1	1	1972	µLÄÒÄy¤Î¥¼¸g¬FÄÒ±ÀÂË	0	0	322	0.3368	0	1	2	KMT	0	0.11343424	0.55313585	1.807874142	»O¥_¥«¤hªL°Ï¥­µ¥¨½
»O¥_¥«¤hªL°Ï¥­µ¥¨½	³¯²K¦a	»O¥_¥«¤hªL°Ï¥­µ¥¨½³¯²K¦a	2	1	1952	µLÄÒÄy¤Î¥¼¸g¬FÄÒ±ÀÂË	0	0	634	0.6631	1	0	2	KMT	0	0.55313585	0.55313585	1.807874142	»O¥_¥«¤hªL°Ï¥­µ¥¨½
»O¥_¥«¤hªL°Ï·Ë¤s¨½	¦ó¤ô¨Ó	»O¥_¥«¤hªL°Ï·Ë¤s¨½¦ó¤ô¨Ó	1	1	1960	µLÄÒÄy¤Î¥¼¸g¬FÄÒ±ÀÂË	0	0	253	0.2527	0	0	4	KMT	0	0.06385729	0.29102127	3.436174957	»O¥_¥«¤hªL°Ï·Ë¤s¨½
»O¥_¥«¤hªL°Ï·Ë¤s¨½	³\¶²µY	»O¥_¥«¤hªL°Ï·Ë¤s¨½³\¶²µY	2	0	1974	µLÄÒÄy¤Î¥¼¸g¬FÄÒ±ÀÂË	0	0	215	0.2147	0	0	4	KMT	0	0.10995338	0.29102127	3.436174957	»O¥_¥«¤hªL°Ï·Ë¤s¨½
»O¥_¥«¤hªL°Ï·Ë¤s¨½	Â²²Mªi	»O¥_¥«¤hªL°Ï·Ë¤s¨½Â²²Mªi	3	1	1961	µLÄÒÄy¤Î¥¼¸g¬FÄÒ±ÀÂË	0	0	407	0.4065	1	1	4	KMT	0	0.27519563	0.29102127	3.436174957	»O¥_¥«¤hªL°Ï·Ë¤s¨½
»O¥_¥«¤hªL°Ï·Ë¤s¨½	¦ó«Ø©¾	»O¥_¥«¤hªL°Ï·Ë¤s¨½¦ó«Ø©¾	4	1	1961	µLÄÒÄy¤Î¥¼¸g¬FÄÒ±ÀÂË	0	0	126	0.1258	0	0	4	KMT	0	0.29102127	0.29102127	3.436174957	»O¥_¥«¤hªL°Ï·Ë¤s¨½
»O¥_¥«¤hªL°Ï»A¤s¨½	¤ýÂ§ñ¯	»O¥_¥«¤hªL°Ï»A¤s¨½¤ýÂ§ñ¯	1	1	1938	¤¤°ê°ê¥ÁÄÒ	1	0	1413	1	1	1	1	KMT	0	1	1	1	»O¥_¥«¤hªL°Ï»A¤s¨½
»O¥_¥«¤hªL°ÏÁ{·Ë¨½	®}»Ê¶§	»O¥_¥«¤hªL°ÏÁ{·Ë¨½®}»Ê¶§	1	1	1971	µLÄÒÄy¤Î¥¼¸g¬FÄÒ±ÀÂË	0	0	600	0.3575	0	0	2	KMT	0	0.12780625	0.54048401	1.850193496	»O¥_¥«¤hªL°ÏÁ{·Ë¨½
»O¥_¥«¤hªL°ÏÁ{·Ë¨½	³¢»F´I	»O¥_¥«¤hªL°ÏÁ{·Ë¨½³¢»F´I	2	1	1956	µLÄÒÄy¤Î¥¼¸g¬FÄÒ±ÀÂË	0	0	1078	0.6424	1	1	2	KMT	0	0.54048401	0.54048401	1.850193496	»O¥_¥«¤hªL°ÏÁ{·Ë¨½
»O¥_¥«¤º´ò°Ï¦è´ò¨½	³¯¸U²»	»O¥_¥«¤º´ò°Ï¦è´ò¨½³¯¸U²»	1	1	1957	¤¤°ê°ê¥ÁÄÒ	1	0	1096	0.2517	0	0	3	KMT	0	0.06335289	0.34756954	2.877122086	»O¥_¥«¤º´ò°Ï¦è´ò¨½
»O¥_¥«¤º´ò°Ï¦è´ò¨½	³¯ºÖ¬K	»O¥_¥«¤º´ò°Ï¦è´ò¨½³¯ºÖ¬K	2	1	1956	µLÄÒÄy¤Î¥¼¸g¬FÄÒ±ÀÂË	0	0	1425	0.3272	0	0	3	KMT	0	0.17041273	0.34756954	2.877122086	»O¥_¥«¤º´ò°Ï¦è´ò¨½
»O¥_¥«¤º´ò°Ï¦è´ò¨½	ªL¥¿¶¯	»O¥_¥«¤º´ò°Ï¦è´ò¨½ªL¥¿¶¯	3	1	1956	µLÄÒÄy¤Î¥¼¸g¬FÄÒ±ÀÂË	0	0	1833	0.4209	1	1	3	KMT	0	0.34756954	0.34756954	2.877122086	»O¥_¥«¤º´ò°Ï¦è´ò¨½
»O¥_¥«¤º´ò°Ï¦è±d¨½	¤ý¿³°ê	»O¥_¥«¤º´ò°Ï¦è±d¨½¤ý¿³°ê	1	1	1962	¤¤°ê°ê¥ÁÄÒ	1	0	4461	1	1	1	1	KMT	0	1	1	1	»O¥_¥«¤º´ò°Ï¦è±d¨½
»O¥_¥«¤º´ò°Ï¦è¦w¨½	®]ÕQ	»O¥_¥«¤º´ò°Ï¦è¦w¨½®]ÕQ	1	1	1951	¤¤°ê°ê¥ÁÄÒ	1	0	1902	0.5183	1	0	3	KMT	0	0.26863489	0.40139214	2.491329302	»O¥_¥«¤º´ò°Ï¦è¦w¨½
»O¥_¥«¤º´ò°Ï¦è¦w¨½	¨H¦è¹F	»O¥_¥«¤º´ò°Ï¦è¦w¨½¨H¦è¹F	2	1	1950	¥Á¥D¶i¨BÄÒ	0	1	1220	0.3325	0	0	3	KMT	0	0.37919114	0.40139214	2.491329302	»O¥_¥«¤º´ò°Ï¦è¦w¨½
»O¥_¥«¤º´ò°Ï¦è¦w¨½	¨H¬ü¥É	»O¥_¥«¤º´ò°Ï¦è¦w¨½¨H¬ü¥É	3	0	1946	µLÄÒÄy¤Î¥¼¸g¬FÄÒ±ÀÂË	0	0	547	0.149	0	0	3	KMT	0	0.40139214	0.40139214	2.491329302	»O¥_¥«¤º´ò°Ï¦è¦w¨½
»O¥_¥«¤º´ò°Ï´äáY¨½	Ã¹§ø¶¯	»O¥_¥«¤º´ò°Ï´äáY¨½Ã¹§ø¶¯	1	1	1944	¤¤°ê°ê¥ÁÄÒ	1	0	1454	0.4396	1	1	3	KMT	0	0.19324816	0.36004436	2.777435536	»O¥_¥«¤º´ò°Ï´äáY¨½
»O¥_¥«¤º´ò°Ï´äáY¨½	ÃQ´º«°	»O¥_¥«¤º´ò°Ï´äáY¨½ÃQ´º«°	2	1	1953	µLÄÒÄy¤Î¥¼¸g¬FÄÒ±ÀÂË	0	0	1159	0.3504	0	0	3	KMT	0	0.31602832	0.36004436	2.777435536	»O¥_¥«¤º´ò°Ï´äáY¨½
»O¥_¥«¤º´ò°Ï´äáY¨½	¹ù¬fªQ	»O¥_¥«¤º´ò°Ï´äáY¨½¹ù¬fªQ	3	1	1973	µLÄÒÄy¤Î¥¼¸g¬FÄÒ±ÀÂË	0	0	694	0.2098	0	0	3	KMT	0	0.36004436	0.36004436	2.777435536	»O¥_¥«¤º´ò°Ï´äáY¨½
»O¥_¥«¤º´ò°Ï´ä³£¨½	§d²W»í	»O¥_¥«¤º´ò°Ï´ä³£¨½§d²W»í	1	1	1967	¤¤°ê°ê¥ÁÄÒ	1	0	1020	0.3363	0	0	2	KMT	0	0.11309769	0.55346265	1.806806656	»O¥_¥«¤º´ò°Ï´ä³£¨½
»O¥_¥«¤º´ò°Ï´ä³£¨½	¦¿¤ôÀs	»O¥_¥«¤º´ò°Ï´ä³£¨½¦¿¤ôÀs	2	1	1957	µLÄÒÄy¤Î¥¼¸g¬FÄÒ±ÀÂË	0	0	2013	0.6636	1	1	2	KMT	0	0.55346265	0.55346265	1.806806656	»O¥_¥«¤º´ò°Ï´ä³£¨½
»O¥_¥«¤º´ò°Ï´ä´I¨½	¹ù»a¬f	»O¥_¥«¤º´ò°Ï´ä´I¨½¹ù»a¬f	1	1	1951	¤¤°ê°ê¥ÁÄÒ	1	0	761	0.1466	0	0	4	KMT	0	0.02149156	0.32286342	3.097284914	»O¥_¥«¤º´ò°Ï´ä´I¨½
»O¥_¥«¤º´ò°Ï´ä´I¨½	§õ¦w¨¹	»O¥_¥«¤º´ò°Ï´ä´I¨½§õ¦w¨¹	2	1	1966	µLÄÒÄy¤Î¥¼¸g¬FÄÒ±ÀÂË	0	0	2365	0.4556	1	1	4	KMT	0	0.22906292	0.32286342	3.097284914	»O¥_¥«¤º´ò°Ï´ä´I¨½
»O¥_¥«¤º´ò°Ï´ä´I¨½	·¨¼yÄÁ	»O¥_¥«¤º´ò°Ï´ä´I¨½·¨¼yÄÁ	3	1	1962	µLÄÒÄy¤Î¥¼¸g¬FÄÒ±ÀÂË	0	0	586	0.1129	0	0	4	KMT	0	0.24180933	0.32286342	3.097284914	»O¥_¥«¤º´ò°Ï´ä´I¨½
»O¥_¥«¤º´ò°Ï´ä´I¨½	³¯¸Î°ò	»O¥_¥«¤º´ò°Ï´ä´I¨½³¯¸Î°ò	4	1	1953	µLÄÒÄy¤Î¥¼¸g¬FÄÒ±ÀÂË	0	0	1478	0.2847	0	0	4	KMT	0	0.32286342	0.32286342	3.097284914	»O¥_¥«¤º´ò°Ï´ä´I¨½
»O¥_¥«¤º´ò°Ï´äµØ¨½	³\¬K¬h	»O¥_¥«¤º´ò°Ï´äµØ¨½³\¬K¬h	1	1	1957	µLÄÒÄy¤Î¥¼¸g¬FÄÒ±ÀÂË	0	0	1609	0.3324	0	1	3	KMT	0	0.11048976	0.38147301	2.621417437	»O¥_¥«¤º´ò°Ï´äµØ¨½
»O¥_¥«¤º´ò°Ï´äµØ¨½	¼B¹F³{	»O¥_¥«¤º´ò°Ï´äµØ¨½¼B¹F³{	2	1	1947	µLÄÒÄy¤Î¥¼¸g¬FÄÒ±ÀÂË	0	0	2367	0.489	1	0	3	KMT	0	0.34961076	0.38147301	2.621417437	»O¥_¥«¤º´ò°Ï´äµØ¨½
»O¥_¥«¤º´ò°Ï´äµØ¨½	¤ýµMè®	»O¥_¥«¤º´ò°Ï´äµØ¨½¤ýµMè®	3	1	1951	¤¤°ê°ê¥ÁÄÒ	1	0	864	0.1785	0	0	3	KMT	0	0.38147301	0.38147301	2.621417437	»O¥_¥«¤º´ò°Ï´äµØ¨½
»O¥_¥«¤º´ò°Ï¤º´ò¨½	¼BºÖ¬P	»O¥_¥«¤º´ò°Ï¤º´ò¨½¼BºÖ¬P	1	1	1951	¤¤°ê°ê¥ÁÄÒ	1	0	1253	0.3878	1	1	3	KMT	0	0.15038884	0.34532406	2.895830658	»O¥_¥«¤º´ò°Ï¤º´ò¨½
»O¥_¥«¤º´ò°Ï¤º´ò¨½	¶À«T½å	»O¥_¥«¤º´ò°Ï¤º´ò¨½¶À«T½å	2	1	1965	µLÄÒÄy¤Î¥¼¸g¬FÄÒ±ÀÂË	0	0	789	0.2441	0	0	3	KMT	0	0.20997365	0.34532406	2.895830658	»O¥_¥«¤º´ò°Ï¤º´ò¨½
»O¥_¥«¤º´ò°Ï¤º´ò¨½	³\©÷µØ	»O¥_¥«¤º´ò°Ï¤º´ò¨½³\©÷µØ	3	1	1964	µLÄÒÄy¤Î¥¼¸g¬FÄÒ±ÀÂË	0	0	1189	0.3679	0	0	3	KMT	0	0.34532406	0.34532406	2.895830658	»O¥_¥«¤º´ò°Ï¤º´ò¨½
»O¥_¥«¤º´ò°Ï´òÀØ¨½	³¯¤×³·	»O¥_¥«¤º´ò°Ï´òÀØ¨½³¯¤×³·	1	0	1949	¤¤°ê°ê¥ÁÄÒ	1	0	2432	0.5555	1	1	2	KMT	0	0.30858025	0.50607161	1.976004937	»O¥_¥«¤º´ò°Ï´òÀØ¨½
»O¥_¥«¤º´ò°Ï´òÀØ¨½	¯³à±³Ô	»O¥_¥«¤º´ò°Ï´òÀØ¨½¯³à±³Ô	2	1	1966	µLÄÒÄy¤Î¥¼¸g¬FÄÒ±ÀÂË	0	0	1946	0.4444	0	0	2	KMT	0	0.50607161	0.50607161	1.976004937	»O¥_¥«¤º´ò°Ï´òÀØ¨½
»O¥_¥«¤º´ò°Ïµµ¬P¨½	ÁÂ¸U¬K	»O¥_¥«¤º´ò°Ïµµ¬P¨½ÁÂ¸U¬K	1	1	1953	µLÄÒÄy¤Î¥¼¸g¬FÄÒ±ÀÂË	0	0	4000	1	1	1	1	KMT	0	1	1	1	»O¥_¥«¤º´ò°Ïµµ¬P¨½
»O¥_¥«¤º´ò°Ï¤j´ò¨½	³¢©[²»	»O¥_¥«¤º´ò°Ï¤j´ò¨½³¢©[²»	1	1	1959	¤¤°ê°ê¥ÁÄÒ	1	0	1235	0.4428	1	1	3	KMT	0	0.19607184	0.35138817	2.845855625	»O¥_¥«¤º´ò°Ï¤j´ò¨½
»O¥_¥«¤º´ò°Ï¤j´ò¨½	§õ¤é¶i	»O¥_¥«¤º´ò°Ï¤j´ò¨½§õ¤é¶i	2	1	1967	µLÄÒÄy¤Î¥¼¸g¬FÄÒ±ÀÂË	0	0	754	0.2703	0	0	3	KMT	0	0.26913393	0.35138817	2.845855625	»O¥_¥«¤º´ò°Ï¤j´ò¨½
»O¥_¥«¤º´ò°Ï¤j´ò¨½	ªL¤å´Ü	»O¥_¥«¤º´ò°Ï¤j´ò¨½ªL¤å´Ü	3	1	1957	µLÄÒÄy¤Î¥¼¸g¬FÄÒ±ÀÂË	0	0	800	0.2868	0	0	3	KMT	0	0.35138817	0.35138817	2.845855625	»O¥_¥«¤º´ò°Ï¤j´ò¨½
»O¥_¥«¤º´ò°Ïª÷Às¨½	·¨ªe¥þ	»O¥_¥«¤º´ò°Ïª÷Às¨½·¨ªe¥þ	1	1	1956	µLÄÒÄy¤Î¥¼¸g¬FÄÒ±ÀÂË	0	0	901	0.2906	0	0	3	KMT	0	0.08444836	0.36261285	2.75776217	»O¥_¥«¤º´ò°Ïª÷Às¨½
»O¥_¥«¤º´ò°Ïª÷Às¨½	¤ý©v¤å	»O¥_¥«¤º´ò°Ïª÷Às¨½¤ý©v¤å	2	1	1967	µLÄÒÄy¤Î¥¼¸g¬FÄÒ±ÀÂË	0	0	742	0.2393	0	0	3	KMT	0	0.14171285	0.36261285	2.75776217	»O¥_¥«¤º´ò°Ïª÷Às¨½
»O¥_¥«¤º´ò°Ïª÷Às¨½	¿à¤å²»	»O¥_¥«¤º´ò°Ïª÷Às¨½¿à¤å²»	3	1	1953	¤¤°ê°ê¥ÁÄÒ	1	0	1457	0.47	1	1	3	KMT	0	0.36261285	0.36261285	2.75776217	»O¥_¥«¤º´ò°Ïª÷Às¨½
»O¥_¥«¤º´ò°Ïª÷·ç¨½	¶ÀÃ£¼z	»O¥_¥«¤º´ò°Ïª÷·ç¨½¶ÀÃ£¼z	1	0	1976	¤¤°ê°ê¥ÁÄÒ	1	0	1316	0.3449	0	1	3	KMT	0	0.11895601	0.37988502	2.632375449	»O¥_¥«¤º´ò°Ïª÷·ç¨½
»O¥_¥«¤º´ò°Ïª÷·ç¨½	®]ºÓ«Û	»O¥_¥«¤º´ò°Ïª÷·ç¨½®]ºÓ«Û	2	1	1985	µLÄÒÄy¤Î¥¼¸g¬FÄÒ±ÀÂË	0	0	1831	0.4799	1	0	3	KMT	0	0.34926002	0.37988502	2.632375449	»O¥_¥«¤º´ò°Ïª÷·ç¨½
»O¥_¥«¤º´ò°Ïª÷·ç¨½	¾HªZº~	»O¥_¥«¤º´ò°Ïª÷·ç¨½¾HªZº~	3	1	1953	¥Á¥D¶i¨BÄÒ	0	1	668	0.175	0	0	3	KMT	0	0.37988502	0.37988502	2.632375449	»O¥_¥«¤º´ò°Ïª÷·ç¨½
»O¥_¥«¤º´ò°ÏºÑ¤s¨½	ªôÁ|¶¯	»O¥_¥«¤º´ò°ÏºÑ¤s¨½ªôÁ|¶¯	1	1	1951	µLÄÒÄy¤Î¥¼¸g¬FÄÒ±ÀÂË	0	0	96	0.0254	0	0	4	KMT	0	0.00064516	0.40818046	2.449896793	»O¥_¥«¤º´ò°ÏºÑ¤s¨½
»O¥_¥«¤º´ò°ÏºÑ¤s¨½	·¨ÂE¶v	»O¥_¥«¤º´ò°ÏºÑ¤s¨½·¨ÂE¶v	2	1	1956	µLÄÒÄy¤Î¥¼¸g¬FÄÒ±ÀÂË	0	0	476	0.1261	0	0	4	KMT	0	0.01654637	0.40818046	2.449896793	»O¥_¥«¤º´ò°ÏºÑ¤s¨½
»O¥_¥«¤º´ò°ÏºÑ¤s¨½	¤ý§B¦w	»O¥_¥«¤º´ò°ÏºÑ¤s¨½¤ý§B¦w	3	1	1948	¤¤°ê°ê¥ÁÄÒ	1	0	2077	0.5503	1	1	4	KMT	0	0.31937646	0.40818046	2.449896793	»O¥_¥«¤º´ò°ÏºÑ¤s¨½
»O¥_¥«¤º´ò°ÏºÑ¤s¨½	§õÄR¼b	»O¥_¥«¤º´ò°ÏºÑ¤s¨½§õÄR¼b	4	0	1963	µLÄÒÄy¤Î¥¼¸g¬FÄÒ±ÀÂË	0	0	1125	0.298	0	0	4	KMT	0	0.40818046	0.40818046	2.449896793	»O¥_¥«¤º´ò°ÏºÑ¤s¨½
»O¥_¥«¤º´ò°Ïµµ¶³¨½	¼Ú¶§²M¹Ø	»O¥_¥«¤º´ò°Ïµµ¶³¨½¼Ú¶§²M¹Ø	1	1	1946	¤¤°ê°ê¥ÁÄÒ	1	0	1964	0.6217	1	1	2	KMT	0	0.38651089	0.52954613	1.888409608	»O¥_¥«¤º´ò°Ïµµ¶³¨½
»O¥_¥«¤º´ò°Ïµµ¶³¨½	ªô®Ú	»O¥_¥«¤º´ò°Ïµµ¶³¨½ªô®Ú	2	1	1946	µLÄÒÄy¤Î¥¼¸g¬FÄÒ±ÀÂË	0	0	1195	0.3782	0	0	2	KMT	0	0.52954613	0.52954613	1.888409608	»O¥_¥«¤º´ò°Ïµµ¶³¨½
»O¥_¥«¤º´ò°Ï²M¥Õ¨½	³¯ªF·½	»O¥_¥«¤º´ò°Ï²M¥Õ¨½³¯ªF·½	1	1	1958	¤¤°ê°ê¥ÁÄÒ	1	0	2919	0.6876	1	1	2	KMT	0	0.47279376	0.57032505	1.753386073	»O¥_¥«¤º´ò°Ï²M¥Õ¨½
»O¥_¥«¤º´ò°Ï²M¥Õ¨½	¦¿¤Ñ¦ö	»O¥_¥«¤º´ò°Ï²M¥Õ¨½¦¿¤Ñ¦ö	2	1	1956	µLÄÒÄy¤Î¥¼¸g¬FÄÒ±ÀÂË	0	0	1326	0.3123	0	0	2	KMT	0	0.57032505	0.57032505	1.753386073	»O¥_¥«¤º´ò°Ï²M¥Õ¨½
»O¥_¥«¤º´ò°Ï¸¬¬w¨½	´¿§»©÷	»O¥_¥«¤º´ò°Ï¸¬¬w¨½´¿§»©÷	1	1	1953	¤¤°ê°ê¥ÁÄÒ	1	0	3057	1	1	1	1	KMT	0	1	1	1	»O¥_¥«¤º´ò°Ï¸¬¬w¨½
»O¥_¥«¤º´ò°Ïµµ¶§¨½	ÁÂ·½¼w	»O¥_¥«¤º´ò°Ïµµ¶§¨½ÁÂ·½¼w	1	1	1950	¤¤°ê°ê¥ÁÄÒ	1	0	3730	1	1	1	1	KMT	0	1	1	1	»O¥_¥«¤º´ò°Ïµµ¶§¨½
»O¥_¥«¤º´ò°Ï·ç¶§¨½	¦¿¥ú½÷	»O¥_¥«¤º´ò°Ï·ç¶§¨½¦¿¥ú½÷	1	1	1956	¤¤°ê°ê¥ÁÄÒ	1	0	3710	1	1	1	1	KMT	0	1	1	1	»O¥_¥«¤º´ò°Ï·ç¶§¨½
»O¥_¥«¤º´ò°Ï·ç¥ú¨½	¶À±R½å	»O¥_¥«¤º´ò°Ï·ç¥ú¨½¶À±R½å	1	1	1948	¤¤°ê°ê¥ÁÄÒ	1	0	1344	0.5075	1	0	3	KMT	0	0.25755625	0.37936313	2.635996809	»O¥_¥«¤º´ò°Ï·ç¥ú¨½
»O¥_¥«¤º´ò°Ï·ç¥ú¨½	·¨¿·§g	»O¥_¥«¤º´ò°Ï·ç¥ú¨½·¨¿·§g	2	0	1957	µLÄÒÄy¤Î¥¼¸g¬FÄÒ±ÀÂË	0	0	607	0.2292	0	0	3	KMT	0	0.31008889	0.37936313	2.635996809	»O¥_¥«¤º´ò°Ï·ç¥ú¨½
»O¥_¥«¤º´ò°Ï·ç¥ú¨½	¹ù¯ªªâ	»O¥_¥«¤º´ò°Ï·ç¥ú¨½¹ù¯ªªâ	3	0	1959	µLÄÒÄy¤Î¥¼¸g¬FÄÒ±ÀÂË	0	0	697	0.2632	0	0	3	KMT	0	0.37936313	0.37936313	2.635996809	»O¥_¥«¤º´ò°Ï·ç¥ú¨½
»O¥_¥«¤º´ò°Ï¤­¤À¨½	¤ý®üªK	»O¥_¥«¤º´ò°Ï¤­¤À¨½¤ý®üªK	1	1	1950	µLÄÒÄy¤Î¥¼¸g¬FÄÒ±ÀÂË	0	0	4631	1	1	1	1	KMT	0	1	1	1	»O¥_¥«¤º´ò°Ï¤­¤À¨½
»O¥_¥«¤º´ò°ÏªF´ò¨½	½²ÄR¬ü	»O¥_¥«¤º´ò°ÏªF´ò¨½½²ÄR¬ü	1	0	1961	¥Á¥D¶i¨BÄÒ	0	1	2080	0.4791	0	1	2	KMT	0	0.22953681	0.50076945	1.996926929	»O¥_¥«¤º´ò°ÏªF´ò¨½
»O¥_¥«¤º´ò°ÏªF´ò¨½	´¿Àà²Ô	»O¥_¥«¤º´ò°ÏªF´ò¨½´¿Àà²Ô	2	1	1952	¤¤°ê°ê¥ÁÄÒ	1	0	2261	0.5208	1	0	2	KMT	0	0.50076945	0.50076945	1.996926929	»O¥_¥«¤º´ò°ÏªF´ò¨½
»O¥_¥«¤º´ò°Ï¼Ö±d¨½	Ä¬©ú¬F	»O¥_¥«¤º´ò°Ï¼Ö±d¨½Ä¬©ú¬F	1	1	1956	¤¤°ê°ê¥ÁÄÒ	1	0	1546	0.3415	0	0	2	KMT	0	0.11662225	0.55011281	1.817808969	»O¥_¥«¤º´ò°Ï¼Ö±d¨½
»O¥_¥«¤º´ò°Ï¼Ö±d¨½	±iºÑ¥É	»O¥_¥«¤º´ò°Ï¼Ö±d¨½±iºÑ¥É	2	0	1963	µLÄÒÄy¤Î¥¼¸g¬FÄÒ±ÀÂË	0	0	2981	0.6584	1	1	2	KMT	0	0.55011281	0.55011281	1.817808969	»O¥_¥«¤º´ò°Ï¼Ö±d¨½
»O¥_¥«¤º´ò°Ï¤º·¾¨½	ªL¤åºÖ	»O¥_¥«¤º´ò°Ï¤º·¾¨½ªL¤åºÖ	1	1	1965	¤¤°ê°ê¥ÁÄÒ	1	0	2160	1	1	1	1	KMT	0	1	1	1	»O¥_¥«¤º´ò°Ï¤º·¾¨½
»O¥_¥«¤º´ò°Ï¶g¬ü¨½	³¯©wºa	»O¥_¥«¤º´ò°Ï¶g¬ü¨½³¯©wºa	1	1	1959	µLÄÒÄy¤Î¥¼¸g¬FÄÒ±ÀÂË	0	0	2128	0.7062	1	1	2	KMT	0	0.49871844	0.58497813	1.709465617	»O¥_¥«¤º´ò°Ï¶g¬ü¨½
»O¥_¥«¤º´ò°Ï¶g¬ü¨½	ªL©¾¸q	»O¥_¥«¤º´ò°Ï¶g¬ü¨½ªL©¾¸q	2	1	1954	¥Á¥D¶i¨BÄÒ	0	1	885	0.2937	0	0	2	KMT	0	0.58497813	0.58497813	1.709465617	»O¥_¥«¤º´ò°Ï¶g¬ü¨½
»O¥_¥«¤º´ò°Ï¦æµ½¨½	¨H­ZªQ	»O¥_¥«¤º´ò°Ï¦æµ½¨½¨H­ZªQ	1	1	1953	¤¤°ê°ê¥ÁÄÒ	1	0	3195	1	1	1	1	KMT	0	1	1	1	»O¥_¥«¤º´ò°Ï¦æµ½¨½
»O¥_¥«¤º´ò°Ï¥Û¼æ¨½	?©ú°ê	»O¥_¥«¤º´ò°Ï¥Û¼æ¨½?©ú°ê	1	1	1945	¤¤°ê°ê¥ÁÄÒ	1	0	706	0.5603	1	1	2	KMT	0	0.31393609	0.50718425	1.971670059	»O¥_¥«¤º´ò°Ï¥Û¼æ¨½
»O¥_¥«¤º´ò°Ï¥Û¼æ¨½	¹ùÞm°ê	»O¥_¥«¤º´ò°Ï¥Û¼æ¨½¹ùÞm°ê	2	1	1967	µLÄÒÄy¤Î¥¼¸g¬FÄÒ±ÀÂË	0	0	554	0.4396	0	0	2	KMT	0	0.50718425	0.50718425	1.971670059	»O¥_¥«¤º´ò°Ï¥Û¼æ¨½
»O¥_¥«¤º´ò°Ï´ò¿³¨½	½²¿o®p	»O¥_¥«¤º´ò°Ï´ò¿³¨½½²¿o®p	1	1	1953	µLÄÒÄy¤Î¥¼¸g¬FÄÒ±ÀÂË	0	0	2643	0.7059	1	0	2	KMT	0	0.49829481	0.58473081	1.710188659	»O¥_¥«¤º´ò°Ï´ò¿³¨½
»O¥_¥«¤º´ò°Ï´ò¿³¨½	©P¥Éµ^	»O¥_¥«¤º´ò°Ï´ò¿³¨½©P¥Éµ^	2	0	1954	¤¤°ê°ê¥ÁÄÒ	1	0	1101	0.294	0	0	2	KMT	0	0.58473081	0.58473081	1.710188659	»O¥_¥«¤º´ò°Ï´ò¿³¨½
»O¥_¥«¤º´ò°Ï´ò¤¸¨½	ÁÂ¨Îæ¢	»O¥_¥«¤º´ò°Ï´ò¤¸¨½ÁÂ¨Îæ¢	1	0	1967	¤¤°ê°ê¥ÁÄÒ	1	0	731	0.2348	0	0	4	KMT	0	0.05513104	0.57215598	1.747775143	»O¥_¥«¤º´ò°Ï´ò¤¸¨½
»O¥_¥«¤º´ò°Ï´ò¤¸¨½	¼BÄ_¶Q	»O¥_¥«¤º´ò°Ï´ò¤¸¨½¼BÄ_¶Q	2	0	1959	µLÄÒÄy¤Î¥¼¸g¬FÄÒ±ÀÂË	0	0	49	0.0157	0	0	4	KMT	0	0.05537753	0.57215598	1.747775143	»O¥_¥«¤º´ò°Ï´ò¤¸¨½
»O¥_¥«¤º´ò°Ï´ò¤¸¨½	©P¶¶¦w	»O¥_¥«¤º´ò°Ï´ò¤¸¨½©P¶¶¦w	3	1	1950	µLÄÒÄy¤Î¥¼¸g¬FÄÒ±ÀÂË	0	0	97	0.0311	0	0	4	KMT	0	0.05634474	0.57215598	1.747775143	»O¥_¥«¤º´ò°Ï´ò¤¸¨½
»O¥_¥«¤º´ò°Ï´ò¤¸¨½	ªL©ú·½	»O¥_¥«¤º´ò°Ï´ò¤¸¨½ªL©ú·½	4	1	1959	µLÄÒÄy¤Î¥¼¸g¬FÄÒ±ÀÂË	0	0	2236	0.7182	1	1	4	KMT	0	0.57215598	0.57215598	1.747775143	»O¥_¥«¤º´ò°Ï´ò¤¸¨½
»O¥_¥«¤º´ò°Ï¦w´ò¨½	¤×¾ð©ô	»O¥_¥«¤º´ò°Ï¦w´ò¨½¤×¾ð©ô	1	1	1962	µLÄÒÄy¤Î¥¼¸g¬FÄÒ±ÀÂË	0	0	2076	0.5165	1	1	2	KMT	0	0.26677225	0.50044781	1.998210363	»O¥_¥«¤º´ò°Ï¦w´ò¨½
»O¥_¥«¤º´ò°Ï¦w´ò¨½	¿à·Ó©ú	»O¥_¥«¤º´ò°Ï¦w´ò¨½¿à·Ó©ú	2	1	1966	¤¤°ê°ê¥ÁÄÒ	1	0	1943	0.4834	0	0	2	KMT	0	0.50044781	0.50044781	1.998210363	»O¥_¥«¤º´ò°Ï¦w´ò¨½
»O¥_¥«¤º´ò°Ï¨q´ò¨½	ÁÂ©ú¼Ý	»O¥_¥«¤º´ò°Ï¨q´ò¨½ÁÂ©ú¼Ý	1	1	1961	¤¤°ê°ê¥ÁÄÒ	1	0	2887	1	1	1	1	KMT	0	1	1	1	»O¥_¥«¤º´ò°Ï¨q´ò¨½
»O¥_¥«¤º´ò°Ï¦w®õ¨½	¦¶¼y¨}	»O¥_¥«¤º´ò°Ï¦w®õ¨½¦¶¼y¨}	1	1	1959	¤¤°ê°ê¥ÁÄÒ	1	0	1416	0.4926	0	0	2	KMT	0	0.24265476	0.50000805	1.999967801	»O¥_¥«¤º´ò°Ï¦w®õ¨½
»O¥_¥«¤º´ò°Ï¦w®õ¨½	¦ó¯À½¬	»O¥_¥«¤º´ò°Ï¦w®õ¨½¦ó¯À½¬	2	0	1953	µLÄÒÄy¤Î¥¼¸g¬FÄÒ±ÀÂË	0	0	1458	0.5073	1	0	2	KMT	0	0.50000805	0.50000805	1.999967801	»O¥_¥«¤º´ò°Ï¦w®õ¨½
»O¥_¥«¤º´ò°Ïª÷´ò¨½	ªôª÷ªi	»O¥_¥«¤º´ò°Ïª÷´ò¨½ªôª÷ªi	1	1	1957	¤¤°ê°ê¥ÁÄÒ	1	0	4278	1	1	1	1	KMT	0	1	1	1	»O¥_¥«¤º´ò°Ïª÷´ò¨½
»O¥_¥«¤º´ò°Ï±d¹ç¨½	¼B¶Q­^	»O¥_¥«¤º´ò°Ï±d¹ç¨½¼B¶Q­^	1	0	1952	¤¤°ê°ê¥ÁÄÒ	1	0	2160	0.4816	0	1	2	KMT	0	0.23193856	0.50057345	1.997708828	»O¥_¥«¤º´ò°Ï±d¹ç¨½
»O¥_¥«¤º´ò°Ï±d¹ç¨½	¾G¨q»ñ	»O¥_¥«¤º´ò°Ï±d¹ç¨½¾G¨q»ñ	2	0	1965	µLÄÒÄy¤Î¥¼¸g¬FÄÒ±ÀÂË	0	0	2325	0.5183	1	0	2	KMT	0	0.50057345	0.50057345	1.997708828	»O¥_¥«¤º´ò°Ï±d¹ç¨½
»O¥_¥«¤º´ò°Ï©ú´ò¨½	ÁÂ¬K³ß	»O¥_¥«¤º´ò°Ï©ú´ò¨½ÁÂ¬K³ß	1	1	1951	¤¤°ê°ê¥ÁÄÒ	1	0	1279	0.4797	1	1	3	KMT	0	0.23011209	0.3676693	2.719835461	»O¥_¥«¤º´ò°Ï©ú´ò¨½
»O¥_¥«¤º´ò°Ï©ú´ò¨½	³¯¦U¦w	»O¥_¥«¤º´ò°Ï©ú´ò¨½³¯¦U¦w	2	1	1956	¥Á¥D¶i¨BÄÒ	0	1	784	0.294	0	0	3	KMT	0	0.31654809	0.3676693	2.719835461	»O¥_¥«¤º´ò°Ï©ú´ò¨½
»O¥_¥«¤º´ò°Ï©ú´ò¨½	ªL²Q¬ü	»O¥_¥«¤º´ò°Ï©ú´ò¨½ªL²Q¬ü	3	0	1962	µLÄÒÄy¤Î¥¼¸g¬FÄÒ±ÀÂË	0	0	603	0.2261	0	0	3	KMT	0	0.3676693	0.3676693	2.719835461	»O¥_¥«¤º´ò°Ï©ú´ò¨½
»O¥_¥«¤º´ò°ÏÄª¬w¨½	±i§Ê¯^	»O¥_¥«¤º´ò°ÏÄª¬w¨½±i§Ê¯^	1	1	1953	µLÄÒÄy¤Î¥¼¸g¬FÄÒ±ÀÂË	0	0	214	0.2891	0	0	2	KMT	0	0.08357881	0.58881545	1.698325001	»O¥_¥«¤º´ò°ÏÄª¬w¨½
»O¥_¥«¤º´ò°ÏÄª¬w¨½	³¯©úÀM	»O¥_¥«¤º´ò°ÏÄª¬w¨½³¯©úÀM	2	1	1957	µLÄÒÄy¤Î¥¼¸g¬FÄÒ±ÀÂË	0	0	526	0.7108	1	1	2	KMT	0	0.58881545	0.58881545	1.698325001	»O¥_¥«¤º´ò°ÏÄª¬w¨½
»O¥_¥«¤º´ò°ÏÄR¤s¨½	³\©ú¥þ	»O¥_¥«¤º´ò°ÏÄR¤s¨½³\©ú¥þ	1	1	1958	µLÄÒÄy¤Î¥¼¸g¬FÄÒ±ÀÂË	0	0	2543	1	1	1	1	KMT	0	1	1	1	»O¥_¥«¤º´ò°ÏÄR¤s¨½
»O¥_¥«¤º´ò°ÏÄ_´ò¨½	ªôÅãªQ	»O¥_¥«¤º´ò°ÏÄ_´ò¨½ªôÅãªQ	1	1	1959	µLÄÒÄy¤Î¥¼¸g¬FÄÒ±ÀÂË	0	0	2044	0.6295	1	0	2	KMT	0	0.39627025	0.53346641	1.874532269	»O¥_¥«¤º´ò°ÏÄ_´ò¨½
»O¥_¥«¤º´ò°ÏÄ_´ò¨½	±i°ê¿³	»O¥_¥«¤º´ò°ÏÄ_´ò¨½±i°ê¿³	2	1	1952	¤¤°ê°ê¥ÁÄÒ	1	0	1203	0.3704	0	0	2	KMT	0	0.53346641	0.53346641	1.874532269	»O¥_¥«¤º´ò°ÏÄ_´ò¨½
»O¥_¥«¤º´ò°Ï«n´ò¨½	¾G«¶Âz	»O¥_¥«¤º´ò°Ï«n´ò¨½¾G«¶Âz	1	1	1952	¤¤°ê°ê¥ÁÄÒ	1	0	1014	0.4184	0	0	2	KMT	0	0.17505856	0.51320081	1.948554992	»O¥_¥«¤º´ò°Ï«n´ò¨½
»O¥_¥«¤º´ò°Ï«n´ò¨½	¬x©yªe	»O¥_¥«¤º´ò°Ï«n´ò¨½¬x©yªe	2	1	1942	µLÄÒÄy¤Î¥¼¸g¬FÄÒ±ÀÂË	0	0	1409	0.5815	1	0	2	KMT	0	0.51320081	0.51320081	1.948554992	»O¥_¥«¤º´ò°Ï«n´ò¨½
»O¥_¥««n´ä°Ï«n´ä¨½	Âö¶Q­ë	»O¥_¥««n´ä°Ï«n´ä¨½Âö¶Q­ë	1	0	1948	¤¤°ê°ê¥ÁÄÒ	1	0	1724	0.5252	1	1	2	KMT	0	0.27583504	0.50117513	1.995310502	»O¥_¥««n´ä°Ï«n´ä¨½
»O¥_¥««n´ä°Ï«n´ä¨½	§õ§ÓÀA	»O¥_¥««n´ä°Ï«n´ä¨½§õ§ÓÀA	2	1	1965	µLÄÒÄy¤Î¥¼¸g¬FÄÒ±ÀÂË	0	0	1558	0.4747	0	0	2	KMT	0	0.50117513	0.50117513	1.995310502	»O¥_¥««n´ä°Ï«n´ä¨½
»O¥_¥««n´ä°Ï¤¤«n¨½	¸â©[¶©	»O¥_¥««n´ä°Ï¤¤«n¨½¸â©[¶©	1	1	1954	¤¤°ê°ê¥ÁÄÒ	1	0	1884	1	1	1	1	KMT	0	1	1	1	»O¥_¥««n´ä°Ï¤¤«n¨½
»O¥_¥««n´ä°Ï¤T­«¨½	Âö¤s¬h	»O¥_¥««n´ä°Ï¤T­«¨½Âö¤s¬h	1	1	1950	µLÄÒÄy¤Î¥¼¸g¬FÄÒ±ÀÂË	0	0	597	0.2691	0	0	2	KMT	0	0.07241481	0.60648345	1.64884961	»O¥_¥««n´ä°Ï¤T­«¨½
»O¥_¥««n´ä°Ï¤T­«¨½	¦¿½÷¦N	»O¥_¥««n´ä°Ï¤T­«¨½¦¿½÷¦N	2	1	1943	¤¤°ê°ê¥ÁÄÒ	1	0	1621	0.7308	1	1	2	KMT	0	0.60648345	0.60648345	1.64884961	»O¥_¥««n´ä°Ï¤T­«¨½
»O¥_¥««n´ä°Ï·s´I¨½	³¯¶Ç¥Í	»O¥_¥««n´ä°Ï·s´I¨½³¯¶Ç¥Í	1	1	1952	µLÄÒÄy¤Î¥¼¸g¬FÄÒ±ÀÂË	0	0	736	0.3345	0	0	2	KMT	0	0.11189025	0.55464741	1.802947209	»O¥_¥««n´ä°Ï·s´I¨½
»O¥_¥««n´ä°Ï·s´I¨½	³¯ª÷½ç	»O¥_¥««n´ä°Ï·s´I¨½³¯ª÷½ç	2	1	1944	¤¤°ê°ê¥ÁÄÒ	1	0	1464	0.6654	1	1	2	KMT	0	0.55464741	0.55464741	1.802947209	»O¥_¥««n´ä°Ï·s´I¨½
»O¥_¥««n´ä°Ï¤¤¬ã¨½	·¨¥ß¤Z	»O¥_¥««n´ä°Ï¤¤¬ã¨½·¨¥ß¤Z	1	1	1949	¤¤°ê°ê¥ÁÄÒ	1	0	3128	0.6221	1	1	2	KMT	0	0.38700841	0.52974125	1.887714049	»O¥_¥««n´ä°Ï¤¤¬ã¨½
»O¥_¥««n´ä°Ï¤¤¬ã¨½	±i´f¬ü	»O¥_¥««n´ä°Ï¤¤¬ã¨½±i´f¬ü	2	0	1959	¤¤°ê°ê¥ÁÄÒ	1	0	1900	0.3778	0	0	2	KMT	0	0.52974125	0.52974125	1.887714049	»O¥_¥««n´ä°Ï¤¤¬ã¨½
»O¥_¥««n´ä°Ï¤E¦p¨½	ÁÂ«Ø§Ó	»O¥_¥««n´ä°Ï¤E¦p¨½ÁÂ«Ø§Ó	1	1	1955	µLÄÒÄy¤Î¥¼¸g¬FÄÒ±ÀÂË	0	0	1641	0.4554	0	0	2	KMT	0	0.20738916	0.50386941	1.984641219	»O¥_¥««n´ä°Ï¤E¦p¨½
»O¥_¥««n´ä°Ï¤E¦p¨½	Ä¬°ê½å	»O¥_¥««n´ä°Ï¤E¦p¨½Ä¬°ê½å	2	1	1951	¤¤°ê°ê¥ÁÄÒ	1	0	1962	0.5445	1	1	2	KMT	0	0.50386941	0.50386941	1.984641219	»O¥_¥««n´ä°Ï¤E¦p¨½
»O¥_¥««n´ä°ÏÂÂ²ø¨½	±i·çªÚ	»O¥_¥««n´ä°ÏÂÂ²ø¨½±i·çªÚ	1	0	1962	µLÄÒÄy¤Î¥¼¸g¬FÄÒ±ÀÂË	0	0	2673	0.5244	1	0	2	KMT	0	0.27499536	0.50109561	1.995627142	»O¥_¥««n´ä°ÏÂÂ²ø¨½
»O¥_¥««n´ä°ÏÂÂ²ø¨½	³¯©¾¥¿	»O¥_¥««n´ä°ÏÂÂ²ø¨½³¯©¾¥¿	2	1	1952	¤¤°ê°ê¥ÁÄÒ	1	0	2424	0.4755	0	1	2	KMT	0	0.50109561	0.50109561	1.995627142	»O¥_¥««n´ä°ÏÂÂ²ø¨½
»O¥_¥««n´ä°ÏªF·s¨½	Âö³¯¤ë­^	»O¥_¥««n´ä°ÏªF·s¨½Âö³¯¤ë­^	1	0	1952	¤¤°ê°ê¥ÁÄÒ	1	0	1859	0.4776	0	1	2	KMT	0	0.22810176	0.50089905	1.996410255	»O¥_¥««n´ä°ÏªF·s¨½
»O¥_¥««n´ä°ÏªF·s¨½	¿½º~ºa	»O¥_¥««n´ä°ÏªF·s¨½¿½º~ºa	2	1	1952	¤¤°ê°ê¥ÁÄÒ	1	0	2033	0.5223	1	0	2	KMT	0	0.50089905	0.50089905	1.996410255	»O¥_¥««n´ä°ÏªF·s¨½
»O¥_¥««n´ä°Ï­«¶§¨½	­J¤l®¦	»O¥_¥««n´ä°Ï­«¶§¨½­J¤l®¦	1	1	1982	µLÄÒÄy¤Î¥¼¸g¬FÄÒ±ÀÂË	0	0	431	0.2059	0	0	3	KMT	0	0.04239481	0.40522979	2.467735652	»O¥_¥««n´ä°Ï­«¶§¨½
»O¥_¥««n´ä°Ï­«¶§¨½	§º³Ç­Û	»O¥_¥««n´ä°Ï­«¶§¨½§º³Ç­Û	2	1	1971	¤¤°ê°ê¥ÁÄÒ	1	0	508	0.2427	0	0	3	KMT	0	0.1012981	0.40522979	2.467735652	»O¥_¥««n´ä°Ï­«¶§¨½
»O¥_¥««n´ä°Ï­«¶§¨½	°¨·q©¾	»O¥_¥««n´ä°Ï­«¶§¨½°¨·q©¾	3	1	1947	¤¤°ê°ê¥ÁÄÒ	1	0	1154	0.5513	1	0	3	KMT	0	0.40522979	0.40522979	2.467735652	»O¥_¥««n´ä°Ï­«¶§¨½
»O¥_¥««n´ä°ÏªF©ú¨½	³¯ªZ¥Í	»O¥_¥««n´ä°ÏªF©ú¨½³¯ªZ¥Í	1	1	1940	¤¤°ê°ê¥ÁÄÒ	1	0	1430	0.5051	1	1	4	KMT	0	0.25512601	0.34369812	2.909530026	»O¥_¥««n´ä°ÏªF©ú¨½
»O¥_¥««n´ä°ÏªF©ú¨½	©u¬üÄõ	»O¥_¥««n´ä°ÏªF©ú¨½©u¬üÄõ	2	0	1958	µLÄÒÄy¤Î¥¼¸g¬FÄÒ±ÀÂË	0	0	659	0.2327	0	0	4	KMT	0	0.3092753	0.34369812	2.909530026	»O¥_¥««n´ä°ÏªF©ú¨½
»O¥_¥««n´ä°ÏªF©ú¨½	µ÷¸q¬w	»O¥_¥««n´ä°ÏªF©ú¨½µ÷¸q¬w	3	1	1966	¥Á¥D¶i¨BÄÒ	0	1	351	0.1239	0	0	4	KMT	0	0.32462651	0.34369812	2.909530026	»O¥_¥««n´ä°ÏªF©ú¨½
»O¥_¥««n´ä°ÏªF©ú¨½	¿à­»§D	»O¥_¥««n´ä°ÏªF©ú¨½¿à­»§D	4	0	1968	µLÄÒÄy¤Î¥¼¸g¬FÄÒ±ÀÂË	0	0	391	0.1381	0	0	4	KMT	0	0.34369812	0.34369812	2.909530026	»O¥_¥««n´ä°ÏªF©ú¨½
»O¥_¥««n´ä°Ï¦è·s¨½	±iªÃ§¡	»O¥_¥««n´ä°Ï¦è·s¨½±iªÃ§¡	1	1	1963	µLÄÒÄy¤Î¥¼¸g¬FÄÒ±ÀÂË	0	0	603	0.2166	0	0	3	KMT	0	0.04691556	0.35429013	2.822545466	»O¥_¥««n´ä°Ï¦è·s¨½
»O¥_¥««n´ä°Ï¦è·s¨½	ªôºÑ¯]	»O¥_¥««n´ä°Ï¦è·s¨½ªôºÑ¯]	2	0	1960	¥Á¥D¶i¨BÄÒ	0	1	1138	0.4089	1	0	3	KMT	0	0.21411477	0.35429013	2.822545466	»O¥_¥««n´ä°Ï¦è·s¨½
»O¥_¥««n´ä°Ï¦è·s¨½	Â²®¶¥Í	»O¥_¥««n´ä°Ï¦è·s¨½Â²®¶¥Í	3	1	1952	¤¤°ê°ê¥ÁÄÒ	1	0	1042	0.3744	0	1	3	KMT	0	0.35429013	0.35429013	2.822545466	»O¥_¥««n´ä°Ï¦è·s¨½
»O¥_¥««n´ä°Ï¥É¦¨¨½	¶ÀÁo´¼	»O¥_¥««n´ä°Ï¥É¦¨¨½¶ÀÁo´¼	1	1	1956	µLÄÒÄy¤Î¥¼¸g¬FÄÒ±ÀÂË	0	0	1682	0.6	1	0	2	KMT	0	0.36	0.51992001	1.92337279	»O¥_¥««n´ä°Ï¥É¦¨¨½
»O¥_¥««n´ä°Ï¥É¦¨¨½	¼BÄR¬ü	»O¥_¥««n´ä°Ï¥É¦¨¨½¼BÄR¬ü	2	0	1956	¤¤°ê°ê¥ÁÄÒ	1	0	1121	0.3999	0	0	2	KMT	0	0.51992001	0.51992001	1.92337279	»O¥_¥««n´ä°Ï¥É¦¨¨½
»O¥_¥««n´ä°Ï¦X¦¨¨½	¥Û¤T©_	»O¥_¥««n´ä°Ï¦X¦¨¨½¥Û¤T©_	1	1	1945	¤¤°ê°ê¥ÁÄÒ	1	0	1741	0.4357	0	1	2	KMT	0	0.18983449	0.50815613	1.967899118	»O¥_¥««n´ä°Ï¦X¦¨¨½
»O¥_¥««n´ä°Ï¦X¦¨¨½	©PÁo	»O¥_¥««n´ä°Ï¦X¦¨¨½©PÁo	2	1	1966	µLÄÒÄy¤Î¥¼¸g¬FÄÒ±ÀÂË	0	0	2254	0.5642	1	0	2	KMT	0	0.50815613	0.50815613	1.967899118	»O¥_¥««n´ä°Ï¦X¦¨¨½
»O¥_¥««n´ä°Ï·s¥ú¨½	ÅÇºÍ®K	»O¥_¥««n´ä°Ï·s¥ú¨½ÅÇºÍ®K	1	1	1970	µLÄÒÄy¤Î¥¼¸g¬FÄÒ±ÀÂË	0	0	1078	0.5096	1	0	2	KMT	0	0.25969216	0.50008625	1.99965506	»O¥_¥««n´ä°Ï·s¥ú¨½
»O¥_¥««n´ä°Ï·s¥ú¨½	¾Gª÷ºÖ	»O¥_¥««n´ä°Ï·s¥ú¨½¾Gª÷ºÖ	2	1	1948	¤¤°ê°ê¥ÁÄÒ	1	0	1037	0.4903	0	1	2	KMT	0	0.50008625	0.50008625	1.99965506	»O¥_¥««n´ä°Ï·s¥ú¨½
»O¥_¥««n´ä°ÏÁp¦¨¨½	¨Hªø¼y	»O¥_¥««n´ä°ÏÁp¦¨¨½¨Hªø¼y	1	1	1950	¤¤°ê°ê¥ÁÄÒ	1	0	1714	0.5673	1	1	2	KMT	0	0.32182929	0.50897205	1.964744429	»O¥_¥««n´ä°ÏÁp¦¨¨½
»O¥_¥««n´ä°ÏÁp¦¨¨½	Àj¾¤µn	»O¥_¥««n´ä°ÏÁp¦¨¨½Àj¾¤µn	2	1	1953	µLÄÒÄy¤Î¥¼¸g¬FÄÒ±ÀÂË	0	0	1307	0.4326	0	0	2	KMT	0	0.50897205	0.50897205	1.964744429	»O¥_¥««n´ä°ÏÁp¦¨¨½
»O¥_¥««n´ä°Ï¸UºÖ¨½	ªL«ØµØ	»O¥_¥««n´ä°Ï¸UºÖ¨½ªL«ØµØ	1	1	1956	¤¤°ê°ê¥ÁÄÒ	1	0	2250	1	1	1	1	KMT	0	1	1	1	»O¥_¥««n´ä°Ï¸UºÖ¨½
»O¥_¥««n´ä°ÏÂEºÖ¨½	ªLºÖ¥Í	»O¥_¥««n´ä°ÏÂEºÖ¨½ªLºÖ¥Í	1	1	1948	¤¤°ê°ê¥ÁÄÒ	1	0	1299	0.4888	0	1	2	KMT	0	0.23892544	0.50014865	1.999405577	»O¥_¥««n´ä°ÏÂEºÖ¨½
»O¥_¥««n´ä°ÏÂEºÖ¨½	¼B©ú±d	»O¥_¥««n´ä°ÏÂEºÖ¨½¼B©ú±d	2	1	1950	µLÄÒÄy¤Î¥¼¸g¬FÄÒ±ÀÂË	0	0	1358	0.5111	1	0	2	KMT	0	0.50014865	0.50014865	1.999405577	»O¥_¥««n´ä°ÏÂEºÖ¨½
»O¥_¥««n´ä°Ï¦ÊºÖ¨½	±i¬FªÚ	»O¥_¥««n´ä°Ï¦ÊºÖ¨½±i¬FªÚ	1	1	1960	µLÄÒÄy¤Î¥¼¸g¬FÄÒ±ÀÂË	0	0	1273	0.451	0	0	2	KMT	0	0.203401	0.50469221	1.981405657	»O¥_¥««n´ä°Ï¦ÊºÖ¨½
»O¥_¥««n´ä°Ï¦ÊºÖ¨½	ªL¤õ¦¿	»O¥_¥««n´ä°Ï¦ÊºÖ¨½ªL¤õ¦¿	2	1	1951	¤¤°ê°ê¥ÁÄÒ	1	0	1549	0.5489	1	1	2	KMT	0	0.50469221	0.50469221	1.981405657	»O¥_¥««n´ä°Ï¦ÊºÖ¨½
»O¥_¥««n´ä°Ï¦¨ºÖ¨½	§d³Ó³ß	»O¥_¥««n´ä°Ï¦¨ºÖ¨½§d³Ó³ß	1	1	1960	¤¤°ê°ê¥ÁÄÒ	1	0	2913	1	1	1	1	KMT	0	1	1	1	»O¥_¥««n´ä°Ï¦¨ºÖ¨½
»O¥_¥««n´ä°Ï¤¯ºÖ¨½	§d»F½÷	»O¥_¥««n´ä°Ï¤¯ºÖ¨½§d»F½÷	1	1	1954	µLÄÒÄy¤Î¥¼¸g¬FÄÒ±ÀÂË	0	0	1547	0.5102	1	0	2	KMT	0	0.26030404	0.50011013	1.999559577	»O¥_¥««n´ä°Ï¤¯ºÖ¨½
»O¥_¥««n´ä°Ï¤¯ºÖ¨½	³¯©ú¸q	»O¥_¥««n´ä°Ï¤¯ºÖ¨½³¯©ú¸q	2	1	1942	¤¤°ê°ê¥ÁÄÒ	1	0	1485	0.4897	0	1	2	KMT	0	0.50011013	0.50011013	1.999559577	»O¥_¥««n´ä°Ï¤¯ºÖ¨½
¥«ªQ¤s°Ï²ø·q¨½	¼B¬ü»ñ	¥«ªQ¤s°Ï²ø·q¨½¼B¬ü»ñ	1	0	1944	¤¤°ê°ê¥ÁÄÒ	1	0	1727	0.5514	1	1	4	KMT	0	0.30404196	0.37690842	2.653164395	¥«ªQ¤s°Ï²ø·q¨½
¥«ªQ¤s°Ï²ø·q¨½	§õÜb¶v	¥«ªQ¤s°Ï²ø·q¨½§õÜb¶v	2	1	1973	µLÄÒÄy¤Î¥¼¸g¬FÄÒ±ÀÂË	0	0	293	0.0935	0	0	4	KMT	0	0.31278421	0.37690842	2.653164395	¥«ªQ¤s°Ï²ø·q¨½
¥«ªQ¤s°Ï²ø·q¨½	¨¿©¾®¤	¥«ªQ¤s°Ï²ø·q¨½¨¿©¾®¤	3	1	1961	µLÄÒÄy¤Î¥¼¸g¬FÄÒ±ÀÂË	0	0	481	0.1535	0	0	4	KMT	0	0.33634646	0.37690842	2.653164395	¥«ªQ¤s°Ï²ø·q¨½
¥«ªQ¤s°Ï²ø·q¨½	±i°êµØ	¥«ªQ¤s°Ï²ø·q¨½±i°êµØ	4	1	1955	µLÄÒÄy¤Î¥¼¸g¬FÄÒ±ÀÂË	0	0	631	0.2014	0	0	4	KMT	0	0.37690842	0.37690842	2.653164395	¥«ªQ¤s°Ï²ø·q¨½
»O¥_¥«ªQ¤s°ÏªFºa¨½	¾G¥É±ö	»O¥_¥«ªQ¤s°ÏªFºa¨½¾G¥É±ö	1	0	1951	µLÄÒÄy¤Î¥¼¸g¬FÄÒ±ÀÂË	0	0	4110	1	1	1	1	KMT	0	1	1	1	»O¥_¥«ªQ¤s°ÏªFºa¨½
»O¥_¥«ªQ¤s°Ï¤T¥Á¨½	Áú¤j·©	»O¥_¥«ªQ¤s°Ï¤T¥Á¨½Áú¤j·©	1	1	1948	µLÄÒÄy¤Î¥¼¸g¬FÄÒ±ÀÂË	0	0	979	0.2838	0	0	2	KMT	0	0.08054244	0.59334165	1.685369635	»O¥_¥«ªQ¤s°Ï¤T¥Á¨½
»O¥_¥«ªQ¤s°Ï¤T¥Á¨½	ÁÂ»A¹a	»O¥_¥«ªQ¤s°Ï¤T¥Á¨½ÁÂ»A¹a	2	0	1954	¤¤°ê°ê¥ÁÄÒ	1	0	2470	0.7161	1	0	2	KMT	0	0.59334165	0.59334165	1.685369635	»O¥_¥«ªQ¤s°Ï¤T¥Á¨½
»O¥_¥«ªQ¤s°Ï·s¯q¨½	§d¬ü­s	»O¥_¥«ªQ¤s°Ï·s¯q¨½§d¬ü­s	1	0	1946	¤¤°ê°ê¥ÁÄÒ	1	0	2411	1	1	1	1	KMT	0	1	1	1	»O¥_¥«ªQ¤s°Ï·s¯q¨½
»O¥_¥«ªQ¤s°Ï´IÀA¨½	¤ý¤å¨j	»O¥_¥«ªQ¤s°Ï´IÀA¨½¤ý¤å¨j	1	1	1950	¤¤°ê°ê¥ÁÄÒ	1	0	2346	1	1	1	1	KMT	0	1	1	1	»O¥_¥«ªQ¤s°Ï´IÀA¨½
»O¥_¥«ªQ¤s°Ï·sªF¨½	µØ°ê¶¯	»O¥_¥«ªQ¤s°Ï·sªF¨½µØ°ê¶¯	1	1	1959	¤¤°ê°ê¥ÁÄÒ	1	0	2427	1	1	1	1	KMT	0	1	1	1	»O¥_¥«ªQ¤s°Ï·sªF¨½
»O¥_¥«ªQ¤s°Ï´I®õ¨½	§d¾Ç¼Ý	»O¥_¥«ªQ¤s°Ï´I®õ¨½§d¾Ç¼Ý	1	1	1960	¤¤°ê°ê¥ÁÄÒ	1	0	2213	1	1	1	1	KMT	0	1	1	1	»O¥_¥«ªQ¤s°Ï´I®õ¨½
»O¥_¥«ªQ¤s°Ï¤¶¹Ø¨½	±iªø«°	»O¥_¥«ªQ¤s°Ï¤¶¹Ø¨½±iªø«°	1	1	1958	µLÄÒÄy¤Î¥¼¸g¬FÄÒ±ÀÂË	0	0	1017	0.4043	0	0	2	KMT	0	0.16345849	0.51819785	1.929764857	»O¥_¥«ªQ¤s°Ï¤¶¹Ø¨½
»O¥_¥«ªQ¤s°Ï¤¶¹Ø¨½	½²ÀA¤å	»O¥_¥«ªQ¤s°Ï¤¶¹Ø¨½½²ÀA¤å	2	1	1947	µLÄÒÄy¤Î¥¼¸g¬FÄÒ±ÀÂË	0	0	1498	0.5956	1	1	2	KMT	0	0.51819785	0.51819785	1.929764857	»O¥_¥«ªQ¤s°Ï¤¶¹Ø¨½
»O¥_¥«ªQ¤s°Ïºë©¾¨½	®}ÄR²Ü	»O¥_¥«ªQ¤s°Ïºë©¾¨½®}ÄR²Ü	1	0	1953	µLÄÒÄy¤Î¥¼¸g¬FÄÒ±ÀÂË	0	0	292	0.1246	0	0	3	KMT	0	0.01552516	0.3988202	2.507395563	»O¥_¥«ªQ¤s°Ïºë©¾¨½
»O¥_¥«ªQ¤s°Ïºë©¾¨½	´ö©¾¥¿	»O¥_¥«ªQ¤s°Ïºë©¾¨½´ö©¾¥¿	2	1	1943	¤¤°ê°ê¥ÁÄÒ	1	0	1054	0.45	1	1	3	KMT	0	0.21802516	0.3988202	2.507395563	»O¥_¥«ªQ¤s°Ïºë©¾¨½
»O¥_¥«ªQ¤s°Ïºë©¾¨½	Âö§§©¯	»O¥_¥«ªQ¤s°Ïºë©¾¨½Âö§§©¯	3	1	1961	µLÄÒÄy¤Î¥¼¸g¬FÄÒ±ÀÂË	0	0	996	0.4252	0	0	3	KMT	0	0.3988202	0.3988202	2.507395563	»O¥_¥«ªQ¤s°Ïºë©¾¨½
»O¥_¥«ªQ¤s°ÏªF¥ú¨½	³\¨q¶³	»O¥_¥«ªQ¤s°ÏªF¥ú¨½³\¨q¶³	1	0	1950	¤¤°ê°ê¥ÁÄÒ	1	0	2197	0.5562	1	1	2	KMT	0	0.30935844	0.50622813	1.975393979	»O¥_¥«ªQ¤s°ÏªF¥ú¨½
»O¥_¥«ªQ¤s°ÏªF¥ú¨½	ªL¤åµ²	»O¥_¥«ªQ¤s°ÏªF¥ú¨½ªL¤åµ²	2	1	1946	µLÄÒÄy¤Î¥¼¸g¬FÄÒ±ÀÂË	0	0	1753	0.4437	0	0	2	KMT	0	0.50622813	0.50622813	1.975393979	»O¥_¥«ªQ¤s°ÏªF¥ú¨½
»O¥_¥«ªQ¤s°ÏÀs¥Ð¨½	°K«TÄQ	»O¥_¥«ªQ¤s°ÏÀs¥Ð¨½°K«TÄQ	1	1	1952	¤¤°ê°ê¥ÁÄÒ	1	0	4807	1	1	1	1	KMT	0	1	1	1	»O¥_¥«ªQ¤s°ÏÀs¥Ð¨½
»O¥_¥«ªQ¤s°ÏªF©÷¨½	³¯§Ó©ú	»O¥_¥«ªQ¤s°ÏªF©÷¨½³¯§Ó©ú	1	1	1961	¤¤°ê°ê¥ÁÄÒ	1	0	1331	1	1	1	1	KMT	0	1	1	1	»O¥_¥«ªQ¤s°ÏªF©÷¨½
»O¥_¥«ªQ¤s°ÏªF¶Õ¨½	±iÁ¾»Ê	»O¥_¥«ªQ¤s°ÏªF¶Õ¨½±iÁ¾»Ê	1	1	1961	µLÄÒÄy¤Î¥¼¸g¬FÄÒ±ÀÂË	0	0	2019	1	1	1	1	KMT	0	1	1	1	»O¥_¥«ªQ¤s°ÏªF¶Õ¨½
»O¥_¥«ªQ¤s°Ï¤¤µØ¨½	´å¦N¿³	»O¥_¥«ªQ¤s°Ï¤¤µØ¨½´å¦N¿³	1	1	1967	¤¤°ê°ê¥ÁÄÒ	1	0	2340	0.7099	1	1	2	KMT	0	0.50395801	0.58805801	1.700512506	»O¥_¥«ªQ¤s°Ï¤¤µØ¨½
»O¥_¥«ªQ¤s°Ï¤¤µØ¨½	ªô°®µØ	»O¥_¥«ªQ¤s°Ï¤¤µØ¨½ªô°®µØ	2	1	1953	µLÄÒÄy¤Î¥¼¸g¬FÄÒ±ÀÂË	0	0	956	0.29	0	0	2	KMT	0	0.58805801	0.58805801	1.700512506	»O¥_¥«ªQ¤s°Ï¤¤µØ¨½
»O¥_¥«ªQ¤s°Ï¥Á¦³¨½	¤ý¬üµØ	»O¥_¥«ªQ¤s°Ï¥Á¦³¨½¤ý¬üµØ	1	0	1957	¤¤°ê°ê¥ÁÄÒ	1	0	1818	0.3824	0	0	2	KMT	0	0.14622976	0.52753601	1.895605193	»O¥_¥«ªQ¤s°Ï¥Á¦³¨½
»O¥_¥«ªQ¤s°Ï¥Á¦³¨½	¦¿¥ÃµØ	»O¥_¥«ªQ¤s°Ï¥Á¦³¨½¦¿¥ÃµØ	2	1	1946	¥Á¥D¶i¨BÄÒ	0	1	2936	0.6175	1	1	2	KMT	0	0.52753601	0.52753601	1.895605193	»O¥_¥«ªQ¤s°Ï¥Á¦³¨½
»O¥_¥«ªQ¤s°Ï¥ÁºÖ¨½	¥j·ç¬Ã	»O¥_¥«ªQ¤s°Ï¥ÁºÖ¨½¥j·ç¬Ã	1	0	1956	µLÄÒÄy¤Î¥¼¸g¬FÄÒ±ÀÂË	0	0	2076	0.5655	1	0	2	KMT	0	0.31979025	0.50849361	1.966593051	»O¥_¥«ªQ¤s°Ï¥ÁºÖ¨½
»O¥_¥«ªQ¤s°Ï¥ÁºÖ¨½	ªL®¶©ú	»O¥_¥«ªQ¤s°Ï¥ÁºÖ¨½ªL®¶©ú	2	1	1947	¤¤°ê°ê¥ÁÄÒ	1	0	1595	0.4344	0	1	2	KMT	0	0.50849361	0.50849361	1.966593051	»O¥_¥«ªQ¤s°Ï¥ÁºÖ¨½
»O¥_¥«ªQ¤s°ÏªQ°ò¨½	§õ½÷´_	»O¥_¥«ªQ¤s°ÏªQ°ò¨½§õ½÷´_	1	1	1950	µLÄÒÄy¤Î¥¼¸g¬FÄÒ±ÀÂË	0	0	1883	1	1	1	1	KMT	0	1	1	1	»O¥_¥«ªQ¤s°ÏªQ°ò¨½
»O¥_¥«ªQ¤s°Ï·O¯§¨½	³¯¬î©M	»O¥_¥«ªQ¤s°Ï·O¯§¨½³¯¬î©M	1	1	1947	µLÄÒÄy¤Î¥¼¸g¬FÄÒ±ÀÂË	0	0	779	0.2255	0	0	2	KMT	0	0.05085025	0.65054561	1.537171237	»O¥_¥«ªQ¤s°Ï·O¯§¨½
»O¥_¥«ªQ¤s°Ï·O¯§¨½	§õ¯ª¥Á	»O¥_¥«ªQ¤s°Ï·O¯§¨½§õ¯ª¥Á	2	1	1965	µLÄÒÄy¤Î¥¼¸g¬FÄÒ±ÀÂË	0	0	2675	0.7744	1	1	2	KMT	0	0.65054561	0.65054561	1.537171237	»O¥_¥«ªQ¤s°Ï·O¯§¨½
»O¥_¥«ªQ¤s°Ï¦w¥­¨½	±iÄ£©¾	»O¥_¥«ªQ¤s°Ï¦w¥­¨½±iÄ£©¾	1	1	1961	¤¤°ê°ê¥ÁÄÒ	1	0	1684	0.3558	0	0	2	KMT	0	0.12659364	0.54145845	1.846863781	»O¥_¥«ªQ¤s°Ï¦w¥­¨½
»O¥_¥«ªQ¤s°Ï¦w¥­¨½	¬x?º¡	»O¥_¥«ªQ¤s°Ï¦w¥­¨½¬x?º¡	2	1	1957	µLÄÒÄy¤Î¥¼¸g¬FÄÒ±ÀÂË	0	0	3048	0.6441	1	1	2	KMT	0	0.54145845	0.54145845	1.846863781	»O¥_¥«ªQ¤s°Ï¦w¥­¨½
»O¥_¥«ªQ¤s°ÏÄPµ{¨½	¼B·¨½¬­s	»O¥_¥«ªQ¤s°ÏÄPµ{¨½¼B·¨½¬­s	1	0	1946	¤¤°ê°ê¥ÁÄÒ	1	0	1582	0.5001	1	1	2	KMT	0	0.25010001	0.49990005	2.00039988	»O¥_¥«ªQ¤s°ÏÄPµ{¨½
»O¥_¥«ªQ¤s°ÏÄPµ{¨½	³\ÃC«Ø	»O¥_¥«ªQ¤s°ÏÄPµ{¨½³\ÃC«Ø	2	1	1960	µLÄÒÄy¤Î¥¼¸g¬FÄÒ±ÀÂË	0	0	1581	0.4998	0	0	2	KMT	0	0.49990005	0.49990005	2.00039988	»O¥_¥«ªQ¤s°ÏÄPµ{¨½
»O¥_¥«ªQ¤s°Ï¦Û±j¨½	¨H©y©y	»O¥_¥«ªQ¤s°Ï¦Û±j¨½¨H©y©y	1	0	1956	µLÄÒÄy¤Î¥¼¸g¬FÄÒ±ÀÂË	0	0	2603	0.4849	0	0	2	KMT	0	0.23512801	0.50035301	1.998588956	»O¥_¥«ªQ¤s°Ï¦Û±j¨½
»O¥_¥«ªQ¤s°Ï¦Û±j¨½	§õ¥xµØ	»O¥_¥«ªQ¤s°Ï¦Û±j¨½§õ¥xµØ	2	1	1950	¤¤°ê°ê¥ÁÄÒ	1	0	2765	0.515	1	1	2	KMT	0	0.50035301	0.50035301	1.998588956	»O¥_¥«ªQ¤s°Ï¦Û±j¨½
»O¥_¥«ªQ¤s°Ï¦N²»¨½	³¯¥Ã©÷	»O¥_¥«ªQ¤s°Ï¦N²»¨½³¯¥Ã©÷	1	1	1946	¤¤°ê°ê¥ÁÄÒ	1	0	4020	1	1	1	1	KMT	0	1	1	1	»O¥_¥«ªQ¤s°Ï¦N²»¨½
»O¥_¥«ªQ¤s°Ï·s»E¨½	¿à¸U¦N	»O¥_¥«ªQ¤s°Ï·s»E¨½¿à¸U¦N	1	1	1945	µLÄÒÄy¤Î¥¼¸g¬FÄÒ±ÀÂË	0	0	1413	0.3229	0	0	3	KMT	0	0.10426441	0.38633634	2.588418164	»O¥_¥«ªQ¤s°Ï·s»E¨½
»O¥_¥«ªQ¤s°Ï·s»E¨½	¶À«ØÂ×	»O¥_¥«ªQ¤s°Ï·s»E¨½¶À«ØÂ×	2	1	1958	µLÄÒÄy¤Î¥¼¸g¬FÄÒ±ÀÂË	0	0	769	0.1757	0	0	3	KMT	0	0.1351349	0.38633634	2.588418164	»O¥_¥«ªQ¤s°Ï·s»E¨½
»O¥_¥«ªQ¤s°Ï·s»E¨½	³¢¨q»ñ	»O¥_¥«ªQ¤s°Ï·s»E¨½³¢¨q»ñ	3	0	1954	¤¤°ê°ê¥ÁÄÒ	1	0	2193	0.5012	1	0	3	KMT	0	0.38633634	0.38633634	2.588418164	»O¥_¥«ªQ¤s°Ï·s»E¨½
»O¥_¥«ªQ¤s°Ï´_²±¨½	¤ý¥¿¶¯	»O¥_¥«ªQ¤s°Ï´_²±¨½¤ý¥¿¶¯	1	1	1949	¤¤°ê°ê¥ÁÄÒ	1	0	2085	0.5606	1	1	2	KMT	0	0.31427236	0.50725685	1.971387868	»O¥_¥«ªQ¤s°Ï´_²±¨½
»O¥_¥«ªQ¤s°Ï´_²±¨½	ªô°êÄÖ	»O¥_¥«ªQ¤s°Ï´_²±¨½ªô°êÄÖ	2	1	1957	µLÄÒÄy¤Î¥¼¸g¬FÄÒ±ÀÂË	0	0	1634	0.4393	0	0	2	KMT	0	0.50725685	0.50725685	1.971387868	»O¥_¥«ªQ¤s°Ï´_²±¨½
»O¥_¥«ªQ¤s°Ï¤¤¥¿¨½	¤èºÕ¼ý	»O¥_¥«ªQ¤s°Ï¤¤¥¿¨½¤èºÕ¼ý	1	1	1955	¥Á¥D¶i¨BÄÒ	0	1	2184	0.4663	0	1	2	KMT	0	0.21743569	0.50216465	1.991378724	»O¥_¥«ªQ¤s°Ï¤¤¥¿¨½
»O¥_¥«ªQ¤s°Ï¤¤¥¿¨½	©P³Ó¸Î	»O¥_¥«ªQ¤s°Ï¤¤¥¿¨½©P³Ó¸Î	2	1	1946	µLÄÒÄy¤Î¥¼¸g¬FÄÒ±ÀÂË	0	0	2499	0.5336	1	0	2	KMT	0	0.50216465	0.50216465	1.991378724	»O¥_¥«ªQ¤s°Ï¤¤¥¿¨½
»O¥_¥«ªQ¤s°Ï¤¤±[¨½	±i³¯ºÑ¶³	»O¥_¥«ªQ¤s°Ï¤¤±[¨½±i³¯ºÑ¶³	1	0	1942	¤¤°ê°ê¥ÁÄÒ	1	0	1928	1	1	1	1	KMT	0	1	1	1	»O¥_¥«ªQ¤s°Ï¤¤±[¨½
»O¥_¥«ªQ¤s°Ï¬ü¤¯¨½	¼B±i¬K¬ü	»O¥_¥«ªQ¤s°Ï¬ü¤¯¨½¼B±i¬K¬ü	1	0	1940	¤¤°ê°ê¥ÁÄÒ	1	0	915	0.4997	0	1	2	KMT	0	0.24970009	0.49990013	2.00039956	»O¥_¥«ªQ¤s°Ï¬ü¤¯¨½
»O¥_¥«ªQ¤s°Ï¬ü¤¯¨½	ªL§Ó³Ð	»O¥_¥«ªQ¤s°Ï¬ü¤¯¨½ªL§Ó³Ð	2	1	1963	µLÄÒÄy¤Î¥¼¸g¬FÄÒ±ÀÂË	0	0	916	0.5002	1	0	2	KMT	0	0.49990013	0.49990013	2.00039956	»O¥_¥«ªQ¤s°Ï¬ü¤¯¨½
»O¥_¥«ªQ¤s°Ï¦N¤¯¨½	¤ý§Ó¶Ç	»O¥_¥«ªQ¤s°Ï¦N¤¯¨½¤ý§Ó¶Ç	1	1	1953	¤¤°ê°ê¥ÁÄÒ	1	0	927	0.4258	0	0	2	KMT	0	0.18130564	0.51089645	1.957343802	»O¥_¥«ªQ¤s°Ï¦N¤¯¨½
»O¥_¥«ªQ¤s°Ï¦N¤¯¨½	§õ¶Q¤T	»O¥_¥«ªQ¤s°Ï¦N¤¯¨½§õ¶Q¤T	2	1	1939	¥Á¥D¶i¨BÄÒ	0	1	1250	0.5741	1	1	2	KMT	0	0.51089645	0.51089645	1.957343802	»O¥_¥«ªQ¤s°Ï¦N¤¯¨½
»O¥_¥«ªQ¤s°Ï´°¤Æ¨½	Ä¬ºa¤å	»O¥_¥«ªQ¤s°Ï´°¤Æ¨½Ä¬ºa¤å	1	1	1958	¤¤°ê°ê¥ÁÄÒ	1	0	3150	1	1	1	1	KMT	0	1	1	1	»O¥_¥«ªQ¤s°Ï´°¤Æ¨½
»O¥_¥«ªQ¤s°Ï´_·½¨½	?ºÖ¸q	»O¥_¥«ªQ¤s°Ï´_·½¨½?ºÖ¸q	1	1	1957	¤¤°ê°ê¥ÁÄÒ	1	0	678	0.3834	1	0	3	KMT	0	0.14699556	0.33698572	2.967484794	»O¥_¥«ªQ¤s°Ï´_·½¨½
»O¥_¥«ªQ¤s°Ï´_·½¨½	ÄÁÄ£°®	»O¥_¥«ªQ¤s°Ï´_·½¨½ÄÁÄ£°®	2	1	1937	µLÄÒÄy¤Î¥¼¸g¬FÄÒ±ÀÂË	0	0	540	0.3054	0	1	3	KMT	0	0.24026472	0.33698572	2.967484794	»O¥_¥«ªQ¤s°Ï´_·½¨½
»O¥_¥«ªQ¤s°Ï´_·½¨½	§õ¸U¯q	»O¥_¥«ªQ¤s°Ï´_·½¨½§õ¸U¯q	3	1	1952	µLÄÒÄy¤Î¥¼¸g¬FÄÒ±ÀÂË	0	0	550	0.311	0	0	3	KMT	0	0.33698572	0.33698572	2.967484794	»O¥_¥«ªQ¤s°Ï´_·½¨½
»O¥_¥«ªQ¤s°Ï´_«Ø¨½	ªL»Úªl	»O¥_¥«ªQ¤s°Ï´_«Ø¨½ªL»Úªl	1	1	1944	¤¤°ê°ê¥ÁÄÒ	1	0	1245	0.5482	1	1	2	KMT	0	0.30052324	0.50455613	1.981940047	»O¥_¥«ªQ¤s°Ï´_«Ø¨½
»O¥_¥«ªQ¤s°Ï´_«Ø¨½	³¯ª³¾ì	»O¥_¥«ªQ¤s°Ï´_«Ø¨½³¯ª³¾ì	2	0	1957	µLÄÒÄy¤Î¥¼¸g¬FÄÒ±ÀÂË	0	0	1026	0.4517	0	0	2	KMT	0	0.50455613	0.50455613	1.981940047	»O¥_¥«ªQ¤s°Ï´_«Ø¨½
»O¥_¥«ªQ¤s°Ï´_¶Õ¨½	®}ÄR¶³	»O¥_¥«ªQ¤s°Ï´_¶Õ¨½®}ÄR¶³	1	0	1957	¤¤°ê°ê¥ÁÄÒ	1	0	1633	0.4819	1	1	3	KMT	0	0.23222761	0.38619806	2.589344959	»O¥_¥«ªQ¤s°Ï´_¶Õ¨½
»O¥_¥«ªQ¤s°Ï´_¶Õ¨½	­S¤ì¥Í	»O¥_¥«ªQ¤s°Ï´_¶Õ¨½­S¤ì¥Í	2	1	1946	µLÄÒÄy¤Î¥¼¸g¬FÄÒ±ÀÂË	0	0	540	0.1593	0	0	3	KMT	0	0.2576041	0.38619806	2.589344959	»O¥_¥«ªQ¤s°Ï´_¶Õ¨½
»O¥_¥«ªQ¤s°Ï´_¶Õ¨½	³\³·¯u	»O¥_¥«ªQ¤s°Ï´_¶Õ¨½³\³·¯u	3	0	1962	¥Á¥D¶i¨BÄÒ	0	1	1215	0.3586	0	0	3	KMT	0	0.38619806	0.38619806	2.589344959	»O¥_¥«ªQ¤s°Ï´_¶Õ¨½
»O¥_¥«ªQ¤s°ÏºÖ¦¨¨½	Ä¬²M²N	»O¥_¥«ªQ¤s°ÏºÖ¦¨¨½Ä¬²M²N	1	1	1949	¤¤°ê°ê¥ÁÄÒ	1	0	1139	1	1	1	1	KMT	0	1	1	1	»O¥_¥«ªQ¤s°ÏºÖ¦¨¨½
»O¥_¥««H¸q°Ï¦è§ø¨½	ÄYªø¥Í	»O¥_¥««H¸q°Ï¦è§ø¨½ÄYªø¥Í	1	1	1942	¤¤°ê°ê¥ÁÄÒ	1	0	1483	0.5619	1	1	2	KMT	0	0.31573161	0.50757561	1.970149827	»O¥_¥««H¸q°Ï¦è§ø¨½
»O¥_¥««H¸q°Ï¦è§ø¨½	³¢¸t¹Ø	»O¥_¥««H¸q°Ï¦è§ø¨½³¢¸t¹Ø	2	1	1951	µLÄÒÄy¤Î¥¼¸g¬FÄÒ±ÀÂË	0	0	1156	0.438	0	0	2	KMT	0	0.50757561	0.50757561	1.970149827	»O¥_¥««H¸q°Ï¦è§ø¨½
»O¥_¥««H¸q°Ï¥¿©M¨½	¤¨«T´I	»O¥_¥««H¸q°Ï¥¿©M¨½¤¨«T´I	1	1	1951	¤¤°ê°ê¥ÁÄÒ	1	0	1313	0.5059	1	1	2	KMT	0	0.25593481	0.49997081	2.000116767	»O¥_¥««H¸q°Ï¥¿©M¨½
»O¥_¥««H¸q°Ï¥¿©M¨½	¸³¬Â®Z	»O¥_¥««H¸q°Ï¥¿©M¨½¸³¬Â®Z	2	0	1962	µLÄÒÄy¤Î¥¼¸g¬FÄÒ±ÀÂË	0	0	1282	0.494	0	0	2	KMT	0	0.49997081	0.49997081	2.000116767	»O¥_¥««H¸q°Ï¥¿©M¨½
»O¥_¥««H¸q°Ï¿³¶©¨½	ÃCª÷·½	»O¥_¥««H¸q°Ï¿³¶©¨½ÃCª÷·½	1	1	1968	µLÄÒÄy¤Î¥¼¸g¬FÄÒ±ÀÂË	0	0	308	0.1925	0	0	4	KMT	0	0.03705625	0.27681341	3.612541748	»O¥_¥««H¸q°Ï¿³¶©¨½
»O¥_¥««H¸q°Ï¿³¶©¨½	¤ý«Ø¥Á	»O¥_¥««H¸q°Ï¿³¶©¨½¤ý«Ø¥Á	2	1	1959	¤¤°ê°ê¥ÁÄÒ	1	0	354	0.2212	0	0	4	KMT	0	0.08598569	0.27681341	3.612541748	»O¥_¥««H¸q°Ï¿³¶©¨½
»O¥_¥««H¸q°Ï¿³¶©¨½	Ã¹ªQ¬ü	»O¥_¥««H¸q°Ï¿³¶©¨½Ã¹ªQ¬ü	3	0	1941	µLÄÒÄy¤Î¥¼¸g¬FÄÒ±ÀÂË	0	0	625	0.3906	1	1	4	KMT	0	0.23855405	0.27681341	3.612541748	»O¥_¥««H¸q°Ï¿³¶©¨½
»O¥_¥««H¸q°Ï¿³¶©¨½	½±¤T­¦	»O¥_¥««H¸q°Ï¿³¶©¨½½±¤T­¦	4	1	1942	µLÄÒÄy¤Î¥¼¸g¬FÄÒ±ÀÂË	0	0	313	0.1956	0	0	4	KMT	0	0.27681341	0.27681341	3.612541748	»O¥_¥««H¸q°Ï¿³¶©¨½
»O¥_¥««H¸q°Ï¤¤¿³¨½	§õ­Zºa	»O¥_¥««H¸q°Ï¤¤¿³¨½§õ­Zºa	1	1	1961	¤¤°ê°ê¥ÁÄÒ	1	0	831	0.507	1	1	2	KMT	0	0.257049	0.49999941	2.00000236	»O¥_¥««H¸q°Ï¤¤¿³¨½
»O¥_¥««H¸q°Ï¤¤¿³¨½	³\»Ê°í	»O¥_¥««H¸q°Ï¤¤¿³¨½³\»Ê°í	2	1	1955	µLÄÒÄy¤Î¥¼¸g¬FÄÒ±ÀÂË	0	0	808	0.4929	0	0	2	KMT	0	0.49999941	0.49999941	2.00000236	»O¥_¥««H¸q°Ï¤¤¿³¨½
»O¥_¥««H¸q°Ï·s¤¯¨½	§õ°]¤[	»O¥_¥««H¸q°Ï·s¤¯¨½§õ°]¤[	1	1	1939	¤¤°ê°ê¥ÁÄÒ	1	0	1580	1	1	1	1	KMT	0	1	1	1	»O¥_¥««H¸q°Ï·s¤¯¨½
»O¥_¥««H¸q°Ï¿³¶®¨½	ªL¯Àµ^	»O¥_¥««H¸q°Ï¿³¶®¨½ªL¯Àµ^	1	0	1952	¤¤°ê°ê¥ÁÄÒ	1	0	2703	1	1	0	1	KMT	0	1	1	1	»O¥_¥««H¸q°Ï¿³¶®¨½
»O¥_¥««H¸q°Ï´°«p¨½	¤èÁoªN	»O¥_¥««H¸q°Ï´°«p¨½¤èÁoªN	1	1	1963	¤¤°ê°ê¥ÁÄÒ	1	0	2425	1	1	1	1	KMT	0	1	1	1	»O¥_¥««H¸q°Ï´°«p¨½
»O¥_¥««H¸q°Ï¼s©~¨½	·¨¥É°ó	»O¥_¥««H¸q°Ï¼s©~¨½·¨¥É°ó	1	1	1960	¤¤°ê°ê¥ÁÄÒ	1	0	1747	0.4056	0	0	3	KMT	0	0.16451136	0.3647666	2.741479072	»O¥_¥««H¸q°Ï¼s©~¨½
»O¥_¥««H¸q°Ï¼s©~¨½	ªL®¶ÂE	»O¥_¥««H¸q°Ï¼s©~¨½ªL®¶ÂE	2	1	1950	µLÄÒÄy¤Î¥¼¸g¬FÄÒ±ÀÂË	0	0	1749	0.406	1	1	3	KMT	0	0.32934736	0.3647666	2.741479072	»O¥_¥««H¸q°Ï¼s©~¨½
»O¥_¥««H¸q°Ï¼s©~¨½	³¯²Q®S	»O¥_¥««H¸q°Ï¼s©~¨½³¯²Q®S	3	0	1954	µLÄÒÄy¤Î¥¼¸g¬FÄÒ±ÀÂË	0	0	811	0.1882	0	0	3	KMT	0	0.3647666	0.3647666	2.741479072	»O¥_¥««H¸q°Ï¼s©~¨½
»O¥_¥««H¸q°Ï¦w±d¨½	¸U¦t«í	»O¥_¥««H¸q°Ï¦w±d¨½¸U¦t«í	1	1	1980	µLÄÒÄy¤Î¥¼¸g¬FÄÒ±ÀÂË	0	0	1829	0.3666	0	0	4	KMT	0	0.13439556	0.3251039	3.075939723	»O¥_¥««H¸q°Ï¦w±d¨½
»O¥_¥««H¸q°Ï¦w±d¨½	¼B¾Ë©÷	»O¥_¥««H¸q°Ï¦w±d¨½¼B¾Ë©÷	2	1	1971	µLÄÒÄy¤Î¥¼¸g¬FÄÒ±ÀÂË	0	0	671	0.1345	0	0	4	KMT	0	0.15248581	0.3251039	3.075939723	»O¥_¥««H¸q°Ï¦w±d¨½
»O¥_¥««H¸q°Ï¦w±d¨½	§d¤ô¤W	»O¥_¥««H¸q°Ï¦w±d¨½§d¤ô¤W	3	1	1948	¤¤°ê°ê¥ÁÄÒ	1	0	2019	0.4047	1	1	4	KMT	0	0.3162679	0.3251039	3.075939723	»O¥_¥««H¸q°Ï¦w±d¨½
»O¥_¥««H¸q°Ï¦w±d¨½	´º«Ø¥Á	»O¥_¥««H¸q°Ï¦w±d¨½´º«Ø¥Á	4	1	1958	µLÄÒÄy¤Î¥¼¸g¬FÄÒ±ÀÂË	0	0	469	0.094	0	0	4	KMT	0	0.3251039	0.3251039	3.075939723	»O¥_¥««H¸q°Ï¦w±d¨½
»O¥_¥««H¸q°Ï¤»ÃÀ¨½	¤B¥ÝÞL	»O¥_¥««H¸q°Ï¤»ÃÀ¨½¤B¥ÝÞL	1	0	1959	¤¤°ê°ê¥ÁÄÒ	1	0	977	0.4494	0	0	2	KMT	0	0.20196036	0.50501061	1.980156417	»O¥_¥««H¸q°Ï¤»ÃÀ¨½
»O¥_¥««H¸q°Ï¤»ÃÀ¨½	±iÅv¥Á	»O¥_¥««H¸q°Ï¤»ÃÀ¨½±iÅv¥Á	2	1	1960	µLÄÒÄy¤Î¥¼¸g¬FÄÒ±ÀÂË	0	0	1197	0.5505	1	1	2	KMT	0	0.50501061	0.50501061	1.980156417	»O¥_¥««H¸q°Ï¤»ÃÀ¨½
»O¥_¥««H¸q°Ï¶®²»¨½	ªL»¨«Â	»O¥_¥««H¸q°Ï¶®²»¨½ªL»¨«Â	1	1	1971	µLÄÒÄy¤Î¥¼¸g¬FÄÒ±ÀÂË	0	0	177	0.0639	0	0	4	KMT	0	0.00408321	0.32354362	3.090773355	»O¥_¥««H¸q°Ï¶®²»¨½
»O¥_¥««H¸q°Ï¶®²»¨½	³¯¶³Às	»O¥_¥««H¸q°Ï¶®²»¨½³¯¶³Às	2	1	1957	¥Á¥D¶i¨BÄÒ	0	1	515	0.186	0	0	4	KMT	0	0.03867921	0.32354362	3.090773355	»O¥_¥««H¸q°Ï¶®²»¨½
»O¥_¥««H¸q°Ï¶®²»¨½	¶À¯Â­·	»O¥_¥««H¸q°Ï¶®²»¨½¶À¯Â­·	3	1	1947	¤¤°ê°ê¥ÁÄÒ	1	0	1157	0.4179	1	1	4	KMT	0	0.21331962	0.32354362	3.090773355	»O¥_¥««H¸q°Ï¶®²»¨½
»O¥_¥««H¸q°Ï¶®²»¨½	§d©ú¹a	»O¥_¥««H¸q°Ï¶®²»¨½§d©ú¹a	4	0	1951	µLÄÒÄy¤Î¥¼¸g¬FÄÒ±ÀÂË	0	0	919	0.332	0	0	4	KMT	0	0.32354362	0.32354362	3.090773355	»O¥_¥««H¸q°Ï¶®²»¨½
»O¥_¥««H¸q°Ï¤­±`¨½	¶Àªe§ø	»O¥_¥««H¸q°Ï¤­±`¨½¶Àªe§ø	1	1	1950	¤¤°ê°ê¥ÁÄÒ	1	0	1774	1	1	1	1	KMT	0	1	1	1	»O¥_¥««H¸q°Ï¤­±`¨½
»O¥_¥««H¸q°Ï¤­¥þ¨½	·¨§d¨q¦n	»O¥_¥««H¸q°Ï¤­¥þ¨½·¨§d¨q¦n	1	0	1952	¥Á¥D¶i¨BÄÒ	0	1	2000	0.6535	1	1	2	KMT	0	0.42706225	0.54705521	1.827969064	»O¥_¥««H¸q°Ï¤­¥þ¨½
»O¥_¥««H¸q°Ï¤­¥þ¨½	ªL©ú¶h	»O¥_¥««H¸q°Ï¤­¥þ¨½ªL©ú¶h	2	1	1977	¤¤°ê°ê¥ÁÄÒ	1	0	1060	0.3464	0	0	2	KMT	0	0.54705521	0.54705521	1.827969064	»O¥_¥««H¸q°Ï¤­¥þ¨½
»O¥_¥««H¸q°Ï¥Ã¦N¨½	³¯¥Ã©÷	»O¥_¥««H¸q°Ï¥Ã¦N¨½³¯¥Ã©÷	1	1	1951	¤¤°ê°ê¥ÁÄÒ	1	0	2181	1	1	1	1	KMT	0	1	1	1	»O¥_¥««H¸q°Ï¥Ã¦N¨½
»O¥_¥««H¸q°Ïªø¬K¨½	³\ÀA©¾	»O¥_¥««H¸q°Ïªø¬K¨½³\ÀA©¾	1	1	1957	µLÄÒÄy¤Î¥¼¸g¬FÄÒ±ÀÂË	0	0	2113	1	1	1	1	KMT	0	1	1	1	»O¥_¥««H¸q°Ïªø¬K¨½
»O¥_¥««H¸q°Ï¥|¨|¨½	ªL­õ¼y	»O¥_¥««H¸q°Ï¥|¨|¨½ªL­õ¼y	1	1	1971	µLÄÒÄy¤Î¥¼¸g¬FÄÒ±ÀÂË	0	0	1682	0.5046	1	0	2	KMT	0	0.25462116	0.49994325	2.000227026	»O¥_¥««H¸q°Ï¥|¨|¨½
»O¥_¥««H¸q°Ï¥|¨|¨½	³s?°ó	»O¥_¥««H¸q°Ï¥|¨|¨½³s?°ó	2	1	1957	¤¤°ê°ê¥ÁÄÒ	1	0	1651	0.4953	0	1	2	KMT	0	0.49994325	0.49994325	2.000227026	»O¥_¥««H¸q°Ï¥|¨|¨½
»O¥_¥««H¸q°Ï¥|ºû¨½	ªL¤lµY	»O¥_¥««H¸q°Ï¥|ºû¨½ªL¤lµY	1	0	1966	¤¤°ê°ê¥ÁÄÒ	1	0	1776	0.5867	1	0	3	KMT	0	0.34421689	0.45822282	2.182344389	»O¥_¥««H¸q°Ï¥|ºû¨½
»O¥_¥««H¸q°Ï¥|ºû¨½	³¯´¼¸q	»O¥_¥««H¸q°Ï¥|ºû¨½³¯´¼¸q	2	1	1951	¥Á¥D¶i¨BÄÒ	0	1	988	0.3263	0	0	3	KMT	0	0.45068858	0.45822282	2.182344389	»O¥_¥««H¸q°Ï¥|ºû¨½
»O¥_¥««H¸q°Ï¥|ºû¨½	¹ù¦~«a	»O¥_¥««H¸q°Ï¥|ºû¨½¹ù¦~«a	3	1	1951	µLÄÒÄy¤Î¥¼¸g¬FÄÒ±ÀÂË	0	0	263	0.0868	0	0	3	KMT	0	0.45822282	0.45822282	2.182344389	»O¥_¥««H¸q°Ï¥|ºû¨½
»O¥_¥««H¸q°Ï¥Ã¬K¨½	ªL³Ó¦¸	»O¥_¥««H¸q°Ï¥Ã¬K¨½ªL³Ó¦¸	1	1	1950	¤¤°ê°ê¥ÁÄÒ	1	0	692	0.2357	0	0	4	KMT	0	0.05555449	0.30661908	3.261375646	»O¥_¥««H¸q°Ï¥Ã¬K¨½
»O¥_¥««H¸q°Ï¥Ã¬K¨½	´^³Ó¿Ñ	»O¥_¥««H¸q°Ï¥Ã¬K¨½´^³Ó¿Ñ	2	1	1948	¥Á¥D¶i¨BÄÒ	0	1	1283	0.4371	1	1	4	KMT	0	0.2466109	0.30661908	3.261375646	»O¥_¥««H¸q°Ï¥Ã¬K¨½
»O¥_¥««H¸q°Ï¥Ã¬K¨½	¬öÀA³¹	»O¥_¥««H¸q°Ï¥Ã¬K¨½¬öÀA³¹	3	1	1958	µLÄÒÄy¤Î¥¼¸g¬FÄÒ±ÀÂË	0	0	312	0.1063	0	0	4	KMT	0	0.25791059	0.30661908	3.261375646	»O¥_¥««H¸q°Ï¥Ã¬K¨½
»O¥_¥««H¸q°Ï¥Ã¬K¨½	¼ï©[¥Í	»O¥_¥««H¸q°Ï¥Ã¬K¨½¼ï©[¥Í	4	1	1948	µLÄÒÄy¤Î¥¼¸g¬FÄÒ±ÀÂË	0	0	648	0.2207	0	0	4	KMT	0	0.30661908	0.30661908	3.261375646	»O¥_¥««H¸q°Ï¥Ã¬K¨½
»O¥_¥««H¸q°Ï´I¥x¨½	³¯°êµØ	»O¥_¥««H¸q°Ï´I¥x¨½³¯°êµØ	1	1	1953	¤¤°ê°ê¥ÁÄÒ	1	0	1558	0.6762	1	1	2	KMT	0	0.45724644	0.56202813	1.779270372	»O¥_¥««H¸q°Ï´I¥x¨½
»O¥_¥««H¸q°Ï´I¥x¨½	±i°^«n	»O¥_¥««H¸q°Ï´I¥x¨½±i°^«n	2	1	1952	µLÄÒÄy¤Î¥¼¸g¬FÄÒ±ÀÂË	0	0	746	0.3237	0	0	2	KMT	0	0.56202813	0.56202813	1.779270372	»O¥_¥««H¸q°Ï´I¥x¨½
»O¥_¥««H¸q°Ï°ê·~¨½	§õ·ç²M	»O¥_¥««H¸q°Ï°ê·~¨½§õ·ç²M	1	1	1961	µLÄÒÄy¤Î¥¼¸g¬FÄÒ±ÀÂË	0	0	1900	0.4627	0	1	2	KMT	0	0.21409129	0.50267513	1.989356426	»O¥_¥««H¸q°Ï°ê·~¨½
»O¥_¥««H¸q°Ï°ê·~¨½	±i¶³®Z	»O¥_¥««H¸q°Ï°ê·~¨½±i¶³®Z	2	0	1961	¤¤°ê°ê¥ÁÄÒ	1	0	2206	0.5372	1	0	2	KMT	0	0.50267513	0.50267513	1.989356426	»O¥_¥««H¸q°Ï°ê·~¨½
»O¥_¥««H¸q°ÏªQ¶©¨½	¶À«TÀs	»O¥_¥««H¸q°ÏªQ¶©¨½¶À«TÀs	1	1	1945	¤¤°ê°ê¥ÁÄÒ	1	0	1113	1	1	1	1	KMT	0	1	1	1	»O¥_¥««H¸q°ÏªQ¶©¨½
»O¥_¥««H¸q°ÏªQ¤Í¨½	±i®ü¬î	»O¥_¥««H¸q°ÏªQ¤Í¨½±i®ü¬î	1	1	1954	µLÄÒÄy¤Î¥¼¸g¬FÄÒ±ÀÂË	0	0	1271	0.3464	0	0	5	KMT	0	0.11999296	0.33281671	3.004656827	»O¥_¥««H¸q°ÏªQ¤Í¨½
»O¥_¥««H¸q°ÏªQ¤Í¨½	ªL¥@²»	»O¥_¥««H¸q°ÏªQ¤Í¨½ªL¥@²»	2	1	1951	µLÄÒÄy¤Î¥¼¸g¬FÄÒ±ÀÂË	0	0	55	0.0149	0	0	5	KMT	0	0.12021497	0.33281671	3.004656827	»O¥_¥««H¸q°ÏªQ¤Í¨½
»O¥_¥««H¸q°ÏªQ¤Í¨½	§õ¥@½n	»O¥_¥««H¸q°ÏªQ¤Í¨½§õ¥@½n	3	1	1968	µLÄÒÄy¤Î¥¼¸g¬FÄÒ±ÀÂË	0	0	135	0.0367	0	0	5	KMT	0	0.12156186	0.33281671	3.004656827	»O¥_¥««H¸q°ÏªQ¤Í¨½
»O¥_¥««H¸q°ÏªQ¤Í¨½	¦óÂ§´Ü	»O¥_¥««H¸q°ÏªQ¤Í¨½¦óÂ§´Ü	4	1	1946	¤¤°ê°ê¥ÁÄÒ	1	0	1555	0.4238	1	1	5	KMT	0	0.3011683	0.33281671	3.004656827	»O¥_¥««H¸q°ÏªQ¤Í¨½
»O¥_¥««H¸q°ÏªQ¤Í¨½	§d©ú´¼	»O¥_¥««H¸q°ÏªQ¤Í¨½§d©ú´¼	5	1	1957	µLÄÒÄy¤Î¥¼¸g¬FÄÒ±ÀÂË	0	0	653	0.1779	0	0	5	KMT	0	0.33281671	0.33281671	3.004656827	»O¥_¥««H¸q°ÏªQ¤Í¨½
»O¥_¥««H¸q°ÏªQ¥ú¨½	±i¤å´¼	»O¥_¥««H¸q°ÏªQ¥ú¨½±i¤å´¼	1	1	1957	µLÄÒÄy¤Î¥¼¸g¬FÄÒ±ÀÂË	0	0	824	0.2751	0	1	4	KMT	0	0.07568001	0.3515786	2.844314187	»O¥_¥««H¸q°ÏªQ¥ú¨½
»O¥_¥««H¸q°ÏªQ¥ú¨½	±i¼yÀs	»O¥_¥««H¸q°ÏªQ¥ú¨½±i¼yÀs	2	1	1962	µLÄÒÄy¤Î¥¼¸g¬FÄÒ±ÀÂË	0	0	103	0.0343	0	0	4	KMT	0	0.0768565	0.3515786	2.844314187	»O¥_¥««H¸q°ÏªQ¥ú¨½
»O¥_¥««H¸q°ÏªQ¥ú¨½	½²ºÖ¨Ó	»O¥_¥««H¸q°ÏªQ¥ú¨½½²ºÖ¨Ó	3	1	1957	µLÄÒÄy¤Î¥¼¸g¬FÄÒ±ÀÂË	0	0	1438	0.4801	1	0	4	KMT	0	0.30735251	0.3515786	2.844314187	»O¥_¥««H¸q°ÏªQ¥ú¨½
»O¥_¥««H¸q°ÏªQ¥ú¨½	²ø«ñ¦W	»O¥_¥««H¸q°ÏªQ¥ú¨½²ø«ñ¦W	4	1	1960	µLÄÒÄy¤Î¥¼¸g¬FÄÒ±ÀÂË	0	0	630	0.2103	0	0	4	KMT	0	0.3515786	0.3515786	2.844314187	»O¥_¥««H¸q°ÏªQ¥ú¨½
»O¥_¥««H¸q°Ï¤¤©Y¨½	ÁÂ¬ü¥k	»O¥_¥««H¸q°Ï¤¤©Y¨½ÁÂ¬ü¥k	1	0	1964	µLÄÒÄy¤Î¥¼¸g¬FÄÒ±ÀÂË	0	0	1101	0.4064	0	1	3	KMT	0	0.16516096	0.36983106	2.703937306	»O¥_¥««H¸q°Ï¤¤©Y¨½
»O¥_¥««H¸q°Ï¤¤©Y¨½	´¿¶Ç¹F	»O¥_¥««H¸q°Ï¤¤©Y¨½´¿¶Ç¹F	2	1	1947	¤¤°ê°ê¥ÁÄÒ	1	0	1128	0.4163	1	0	3	KMT	0	0.33846665	0.36983106	2.703937306	»O¥_¥««H¸q°Ï¤¤©Y¨½
»O¥_¥««H¸q°Ï¤¤©Y¨½	³¯¬Kº¡	»O¥_¥««H¸q°Ï¤¤©Y¨½³¯¬Kº¡	3	0	1950	µLÄÒÄy¤Î¥¼¸g¬FÄÒ±ÀÂË	0	0	480	0.1771	0	0	3	KMT	0	0.36983106	0.36983106	2.703937306	»O¥_¥««H¸q°Ï¤¤©Y¨½
»O¥_¥««H¸q°Ï¤¤¦æ¨½	®]©úÄR	»O¥_¥««H¸q°Ï¤¤¦æ¨½®]©úÄR	1	0	1953	µLÄÒÄy¤Î¥¼¸g¬FÄÒ±ÀÂË	0	0	1138	0.2553	0	0	3	KMT	0	0.06517809	0.42603317	2.347235076	»O¥_¥««H¸q°Ï¤¤¦æ¨½
»O¥_¥««H¸q°Ï¤¤¦æ¨½	¼BÀA²»	»O¥_¥««H¸q°Ï¤¤¦æ¨½¼BÀA²»	2	1	1959	µLÄÒÄy¤Î¥¼¸g¬FÄÒ±ÀÂË	0	0	748	0.1678	0	0	3	KMT	0	0.09333493	0.42603317	2.347235076	»O¥_¥««H¸q°Ï¤¤¦æ¨½
»O¥_¥««H¸q°Ï¤¤¦æ¨½	¶À»Í¬F	»O¥_¥««H¸q°Ï¤¤¦æ¨½¶À»Í¬F	3	1	1950	¤¤°ê°ê¥ÁÄÒ	1	0	2571	0.5768	1	1	3	KMT	0	0.42603317	0.42603317	2.347235076	»O¥_¥««H¸q°Ï¤¤¦æ¨½
»O¥_¥««H¸q°Ï¤j¹D¨½	²ø¥@³Ç	»O¥_¥««H¸q°Ï¤j¹D¨½²ø¥@³Ç	1	1	1969	µLÄÒÄy¤Î¥¼¸g¬FÄÒ±ÀÂË	0	0	1112	0.3048	0	0	3	KMT	0	0.09290304	0.40832829	2.44900984	»O¥_¥««H¸q°Ï¤j¹D¨½
»O¥_¥««H¸q°Ï¤j¹D¨½	¶À°·®p	»O¥_¥««H¸q°Ï¤j¹D¨½¶À°·®p	2	1	1982	µLÄÒÄy¤Î¥¼¸g¬FÄÒ±ÀÂË	0	0	567	0.1554	0	0	3	KMT	0	0.1170522	0.40832829	2.44900984	»O¥_¥««H¸q°Ï¤j¹D¨½
»O¥_¥««H¸q°Ï¤j¹D¨½	ªL¹Ø©÷	»O¥_¥««H¸q°Ï¤j¹D¨½ªL¹Ø©÷	3	1	1960	µLÄÒÄy¤Î¥¼¸g¬FÄÒ±ÀÂË	0	0	1969	0.5397	1	1	3	KMT	0	0.40832829	0.40832829	2.44900984	»O¥_¥««H¸q°Ï¤j¹D¨½
»O¥_¥««H¸q°Ï¤j¤¯¨½	½²®Û²M	»O¥_¥««H¸q°Ï¤j¤¯¨½½²®Û²M	1	1	1956	µLÄÒÄy¤Î¥¼¸g¬FÄÒ±ÀÂË	0	0	1757	0.667	1	1	2	KMT	0	0.444889	0.55571141	1.799495173	»O¥_¥««H¸q°Ï¤j¤¯¨½
»O¥_¥««H¸q°Ï¤j¤¯¨½	ªL¶i¿þ	»O¥_¥««H¸q°Ï¤j¤¯¨½ªL¶i¿þ	2	1	1955	µLÄÒÄy¤Î¥¼¸g¬FÄÒ±ÀÂË	0	0	877	0.3329	0	0	2	KMT	0	0.55571141	0.55571141	1.799495173	»O¥_¥««H¸q°Ï¤j¤¯¨½
»O¥_¥««H¸q°Ï´º·s¨½	±i¤Ñ´¼	»O¥_¥««H¸q°Ï´º·s¨½±i¤Ñ´¼	1	1	1946	¤¤°ê°ê¥ÁÄÒ	1	0	2177	1	1	1	1	KMT	0	1	1	1	»O¥_¥««H¸q°Ï´º·s¨½
»O¥_¥««H¸q°Ï´f¦w¨½	©P¸­ªø	»O¥_¥««H¸q°Ï´f¦w¨½©P¸­ªø	1	1	1962	¤¤°ê°ê¥ÁÄÒ	1	0	2431	0.6625	1	1	2	KMT	0	0.43890625	0.55274501	1.80915247	»O¥_¥««H¸q°Ï´f¦w¨½
»O¥_¥««H¸q°Ï´f¦w¨½	ªL¼ä	»O¥_¥««H¸q°Ï´f¦w¨½ªL¼ä	2	0	1952	µLÄÒÄy¤Î¥¼¸g¬FÄÒ±ÀÂË	0	0	1238	0.3374	0	0	2	KMT	0	0.55274501	0.55274501	1.80915247	»O¥_¥««H¸q°Ï´f¦w¨½
»O¥_¥««H¸q°Ï¤T±i¨½	³Å¸Î¶©	»O¥_¥««H¸q°Ï¤T±i¨½³Å¸Î¶©	1	1	1965	µLÄÒÄy¤Î¥¼¸g¬FÄÒ±ÀÂË	0	0	1798	0.3551	0	0	2	KMT	0	0.12609601	0.54186305	1.845484759	»O¥_¥««H¸q°Ï¤T±i¨½
»O¥_¥««H¸q°Ï¤T±i¨½	§õ§B¹Ø	»O¥_¥««H¸q°Ï¤T±i¨½§õ§B¹Ø	2	1	1947	¤¤°ê°ê¥ÁÄÒ	1	0	3264	0.6448	1	1	2	KMT	0	0.54186305	0.54186305	1.845484759	»O¥_¥««H¸q°Ï¤T±i¨½
»O¥_¥««H¸q°Ï¤T²p¨½	®]ÂE¬K	»O¥_¥««H¸q°Ï¤T²p¨½®]ÂE¬K	1	1	1928	¤¤°ê°ê¥ÁÄÒ	1	0	1162	0.4223	1	1	4	KMT	0	0.17833729	0.3058362	3.26972412	»O¥_¥««H¸q°Ï¤T²p¨½
»O¥_¥««H¸q°Ï¤T²p¨½	¸Ñ­×´f	»O¥_¥««H¸q°Ï¤T²p¨½¸Ñ­×´f	2	0	1955	µLÄÒÄy¤Î¥¼¸g¬FÄÒ±ÀÂË	0	0	451	0.1639	0	0	4	KMT	0	0.2052005	0.3058362	3.26972412	»O¥_¥««H¸q°Ï¤T²p¨½
»O¥_¥««H¸q°Ï¤T²p¨½	Ã¹ªl¬u	»O¥_¥««H¸q°Ï¤T²p¨½Ã¹ªl¬u	3	1	1949	µLÄÒÄy¤Î¥¼¸g¬FÄÒ±ÀÂË	0	0	330	0.1199	0	0	4	KMT	0	0.21957651	0.3058362	3.26972412	»O¥_¥««H¸q°Ï¤T²p¨½
»O¥_¥««H¸q°Ï¤T²p¨½	·¨³·§D	»O¥_¥««H¸q°Ï¤T²p¨½·¨³·§D	4	0	1960	µLÄÒÄy¤Î¥¼¸g¬FÄÒ±ÀÂË	0	0	808	0.2937	0	0	4	KMT	0	0.3058362	0.3058362	3.26972412	»O¥_¥««H¸q°Ï¤T²p¨½
»O¥_¥««H¸q°Ï¤»¦X¨½	¥þ§»±j	»O¥_¥««H¸q°Ï¤»¦X¨½¥þ§»±j	1	1	1968	¤¤°ê°ê¥ÁÄÒ	1	0	3196	1	1	1	1	KMT	0	1	1	1	»O¥_¥««H¸q°Ï¤»¦X¨½
»O¥_¥««H¸q°Ï®õ©M¨½	ªL¥¿¸q	»O¥_¥««H¸q°Ï®õ©M¨½ªL¥¿¸q	1	1	1963	¤¤°ê°ê¥ÁÄÒ	1	0	2532	0.5733	1	1	2	KMT	0	0.32867289	0.51066045	1.958248382	»O¥_¥««H¸q°Ï®õ©M¨½
»O¥_¥««H¸q°Ï®õ©M¨½	ÁÂ§Ê°ê	»O¥_¥««H¸q°Ï®õ©M¨½ÁÂ§Ê°ê	2	1	1957	µLÄÒÄy¤Î¥¼¸g¬FÄÒ±ÀÂË	0	0	1884	0.4266	0	0	2	KMT	0	0.51066045	0.51066045	1.958248382	»O¥_¥««H¸q°Ï®õ©M¨½
»O¥_¥««H¸q°Ï´ºÁp¨½	¬xºÖ©P	»O¥_¥««H¸q°Ï´ºÁp¨½¬xºÖ©P	1	1	1949	¤¤°ê°ê¥ÁÄÒ	1	0	2151	1	1	1	1	KMT	0	1	1	1	»O¥_¥««H¸q°Ï´ºÁp¨½
»O¥_¥««H¸q°Ï´º¶Ô¨½	¿à´f­s	»O¥_¥««H¸q°Ï´º¶Ô¨½¿à´f­s	1	0	1962	µLÄÒÄy¤Î¥¼¸g¬FÄÒ±ÀÂË	0	0	1165	0.4824	0	0	2	KMT	0	0.23270976	0.50051601	1.997938088	»O¥_¥««H¸q°Ï´º¶Ô¨½
»O¥_¥««H¸q°Ï´º¶Ô¨½	ªL¬K¥Í	»O¥_¥««H¸q°Ï´º¶Ô¨½ªL¬K¥Í	2	1	1954	¤¤°ê°ê¥ÁÄÒ	1	0	1250	0.5175	1	1	2	KMT	0	0.50051601	0.50051601	1.997938088	»O¥_¥««H¸q°Ï´º¶Ô¨½
»O¥_¥««H¸q°ÏÂù©M¨½	©Pª÷¶i	»O¥_¥««H¸q°ÏÂù©M¨½©Pª÷¶i	1	1	1959	µLÄÒÄy¤Î¥¼¸g¬FÄÒ±ÀÂË	0	0	1445	0.3482	0	0	4	KMT	0	0.12124324	0.33611574	2.975165638	»O¥_¥««H¸q°ÏÂù©M¨½
»O¥_¥««H¸q°ÏÂù©M¨½	¶À²M¤å	»O¥_¥««H¸q°ÏÂù©M¨½¶À²M¤å	2	1	1966	µLÄÒÄy¤Î¥¼¸g¬FÄÒ±ÀÂË	0	0	525	0.1265	0	0	4	KMT	0	0.13724549	0.33611574	2.975165638	»O¥_¥««H¸q°ÏÂù©M¨½
»O¥_¥««H¸q°ÏÂù©M¨½	³¯¯q¥¿	»O¥_¥««H¸q°ÏÂù©M¨½³¯¯q¥¿	3	1	1964	µLÄÒÄy¤Î¥¼¸g¬FÄÒ±ÀÂË	0	0	365	0.0879	0	0	4	KMT	0	0.1449719	0.33611574	2.975165638	»O¥_¥««H¸q°ÏÂù©M¨½
»O¥_¥««H¸q°ÏÂù©M¨½	§º²»½÷	»O¥_¥««H¸q°ÏÂù©M¨½§º²»½÷	4	1	1953	¤¤°ê°ê¥ÁÄÒ	1	0	1814	0.4372	1	1	4	KMT	0	0.33611574	0.33611574	2.975165638	»O¥_¥««H¸q°ÏÂù©M¨½
»O¥_¥««H¸q°Ï¹Å¿³¨½	®}¤åªÚ	»O¥_¥««H¸q°Ï¹Å¿³¨½®}¤åªÚ	1	1	1950	µLÄÒÄy¤Î¥¼¸g¬FÄÒ±ÀÂË	0	0	425	0.2168	0	0	3	KMT	0	0.04700224	0.35800242	2.793277207	»O¥_¥««H¸q°Ï¹Å¿³¨½
»O¥_¥««H¸q°Ï¹Å¿³¨½	¼B¼y²»	»O¥_¥««H¸q°Ï¹Å¿³¨½¼B¼y²»	2	1	1949	µLÄÒÄy¤Î¥¼¸g¬FÄÒ±ÀÂË	0	0	675	0.3443	0	0	3	KMT	0	0.16554473	0.35800242	2.793277207	»O¥_¥««H¸q°Ï¹Å¿³¨½
»O¥_¥««H¸q°Ï¹Å¿³¨½	§õ¿üºa	»O¥_¥««H¸q°Ï¹Å¿³¨½§õ¿üºa	3	1	1955	¤¤°ê°ê¥ÁÄÒ	1	0	860	0.4387	1	1	3	KMT	0	0.35800242	0.35800242	2.793277207	»O¥_¥««H¸q°Ï¹Å¿³¨½
»O¥_¥««H¸q°Ï¾¤¶¶¨½	ªL¼yºÖ	»O¥_¥««H¸q°Ï¾¤¶¶¨½ªL¼yºÖ	1	1	1937	¤¤°ê°ê¥ÁÄÒ	1	0	1742	1	1	1	1	KMT	0	1	1	1	»O¥_¥««H¸q°Ï¾¤¶¶¨½
»O¥_¥««H¸q°Ï¾¤¥­¨½	©Pªü¯]	»O¥_¥««H¸q°Ï¾¤¥­¨½©Pªü¯]	1	0	1936	¤¤°ê°ê¥ÁÄÒ	1	0	3252	1	1	1	1	KMT	0	1	1	1	»O¥_¥««H¸q°Ï¾¤¥­¨½
»O¥_¥««H¸q°Ï¾¤©¾¨½	¶ÀºØ³©	»O¥_¥««H¸q°Ï¾¤©¾¨½¶ÀºØ³©	1	1	1953	µLÄÒÄy¤Î¥¼¸g¬FÄÒ±ÀÂË	0	0	1488	0.5397	1	1	2	KMT	0	0.29127609	0.50306013	1.987833939	»O¥_¥««H¸q°Ï¾¤©¾¨½
»O¥_¥««H¸q°Ï¾¤©¾¨½	³¯·Ø¤å	»O¥_¥««H¸q°Ï¾¤©¾¨½³¯·Ø¤å	2	1	1969	µLÄÒÄy¤Î¥¼¸g¬FÄÒ±ÀÂË	0	0	1269	0.4602	0	0	2	KMT	0	0.50306013	0.50306013	1.987833939	»O¥_¥««H¸q°Ï¾¤©¾¨½
»O¥_¥««H¸q°Ï¾¤¦w¨½	¼B±öµâ	»O¥_¥««H¸q°Ï¾¤¦w¨½¼B±öµâ	1	0	1960	¤¤°ê°ê¥ÁÄÒ	1	0	1032	0.7554	1	0	2	KMT	0	0.57062916	0.63040941	1.586270738	»O¥_¥««H¸q°Ï¾¤¦w¨½
»O¥_¥««H¸q°Ï¾¤¦w¨½	°ª¤õ¥Í	»O¥_¥««H¸q°Ï¾¤¦w¨½°ª¤õ¥Í	2	1	1950	µLÄÒÄy¤Î¥¼¸g¬FÄÒ±ÀÂË	0	0	334	0.2445	0	0	2	KMT	0	0.63040941	0.63040941	1.586270738	»O¥_¥««H¸q°Ï¾¤¦w¨½
¥_¥«¤¤¤s°Ï¥¿¦u¨½	®}»ñ´Â	¥_¥«¤¤¤s°Ï¥¿¦u¨½®}»ñ´Â	1	1	1939	¤¤°ê°ê¥ÁÄÒ	1	0	655	0.3555	0	0	3	KMT	0	0.12638025	0.39755894	2.515350303	¥_¥«¤¤¤s°Ï¥¿¦u¨½
¥_¥«¤¤¤s°Ï¥¿¦u¨½	ªLÏv¸©	¥_¥«¤¤¤s°Ï¥¿¦u¨½ªLÏv¸©	2	0	1974	µLÄÒÄy¤Î¥¼¸g¬FÄÒ±ÀÂË	0	0	922	0.5005	1	1	3	KMT	0	0.3768805	0.39755894	2.515350303	¥_¥«¤¤¤s°Ï¥¿¦u¨½
¥_¥«¤¤¤s°Ï¥¿¦u¨½	§dÂ`¥à	¥_¥«¤¤¤s°Ï¥¿¦u¨½§dÂ`¥à	3	1	1956	µLÄÒÄy¤Î¥¼¸g¬FÄÒ±ÀÂË	0	0	265	0.1438	0	0	3	KMT	0	0.39755894	0.39755894	2.515350303	¥_¥«¤¤¤s°Ï¥¿¦u¨½
»O¥_¥«¤¤¤s°Ï¥¿¸q¨½	¤ý©ú©ú	»O¥_¥«¤¤¤s°Ï¥¿¸q¨½¤ý©ú©ú	1	1	1955	µLÄÒÄy¤Î¥¼¸g¬FÄÒ±ÀÂË	0	0	2020	1	1	1	1	KMT	0	1	1	1	»O¥_¥«¤¤¤s°Ï¥¿¸q¨½
»O¥_¥«¤¤¤s°Ï¥¿±o¨½	ªô¥Ã²»	»O¥_¥«¤¤¤s°Ï¥¿±o¨½ªô¥Ã²»	1	1	1940	µLÄÒÄy¤Î¥¼¸g¬FÄÒ±ÀÂË	0	0	633	0.3501	0	0	2	KMT	0	0.12257001	0.54481005	1.835502117	»O¥_¥«¤¤¤s°Ï¥¿±o¨½
»O¥_¥«¤¤¤s°Ï¥¿±o¨½	§dÄ¬¨qÁø	»O¥_¥«¤¤¤s°Ï¥¿±o¨½§dÄ¬¨qÁø	2	0	1946	¤¤°ê°ê¥ÁÄÒ	1	0	1175	0.6498	1	1	2	KMT	0	0.54481005	0.54481005	1.835502117	»O¥_¥«¤¤¤s°Ï¥¿±o¨½
»O¥_¥«¤¤¤s°Ï¥Á¦w¨½	²ø¤ÑºÖ	»O¥_¥«¤¤¤s°Ï¥Á¦w¨½²ø¤ÑºÖ	1	1	1956	¤¤°ê°ê¥ÁÄÒ	1	0	1025	0.3824	0	0	2	KMT	0	0.14622976	0.52753601	1.895605193	»O¥_¥«¤¤¤s°Ï¥Á¦w¨½
»O¥_¥«¤¤¤s°Ï¥Á¦w¨½	¤ýª¢¥Í	»O¥_¥«¤¤¤s°Ï¥Á¦w¨½¤ýª¢¥Í	2	1	1954	µLÄÒÄy¤Î¥¼¸g¬FÄÒ±ÀÂË	0	0	1655	0.6175	1	1	2	KMT	0	0.52753601	0.52753601	1.895605193	»O¥_¥«¤¤¤s°Ï¥Á¦w¨½
»O¥_¥«¤¤¤s°Ï±d¼Ö¨½	¤ýª÷´I	»O¥_¥«¤¤¤s°Ï±d¼Ö¨½¤ýª÷´I	1	1	1948	µLÄÒÄy¤Î¥¼¸g¬FÄÒ±ÀÂË	0	0	1129	1	1	1	1	KMT	0	1	1	1	»O¥_¥«¤¤¤s°Ï±d¼Ö¨½
»O¥_¥«¤¤¤s°Ï¤¤¤s¨½	´¿Ã£±ö	»O¥_¥«¤¤¤s°Ï¤¤¤s¨½´¿Ã£±ö	1	0	1966	µLÄÒÄy¤Î¥¼¸g¬FÄÒ±ÀÂË	0	0	1719	0.5977	1	0	2	KMT	0	0.35724529	0.51901013	1.926744667	»O¥_¥«¤¤¤s°Ï¤¤¤s¨½
»O¥_¥«¤¤¤s°Ï¤¤¤s¨½	ªLªQ»«	»O¥_¥«¤¤¤s°Ï¤¤¤s¨½ªLªQ»«	2	1	1950	µLÄÒÄy¤Î¥¼¸g¬FÄÒ±ÀÂË	0	0	1157	0.4022	0	1	2	KMT	0	0.51901013	0.51901013	1.926744667	»O¥_¥«¤¤¤s°Ï¤¤¤s¨½
»O¥_¥«¤¤¤s°Ï»E²±¨½	µÎ?»O	»O¥_¥«¤¤¤s°Ï»E²±¨½µÎ?»O	1	1	1954	µLÄÒÄy¤Î¥¼¸g¬FÄÒ±ÀÂË	0	0	738	0.3655	0	0	3	KMT	0	0.13359025	0.33968291	2.943922024	»O¥_¥«¤¤¤s°Ï»E²±¨½
»O¥_¥«¤¤¤s°Ï»E²±¨½	¹Q´f¶²	»O¥_¥«¤¤¤s°Ï»E²±¨½¹Q´f¶²	2	0	1980	¤¤°ê°ê¥ÁÄÒ	1	0	541	0.2679	0	0	3	KMT	0	0.20536066	0.33968291	2.943922024	»O¥_¥«¤¤¤s°Ï»E²±¨½
»O¥_¥«¤¤¤s°Ï»E²±¨½	³¯ÂE³¹	»O¥_¥«¤¤¤s°Ï»E²±¨½³¯ÂE³¹	3	1	1944	µLÄÒÄy¤Î¥¼¸g¬FÄÒ±ÀÂË	0	0	740	0.3665	1	1	3	KMT	0	0.33968291	0.33968291	2.943922024	»O¥_¥«¤¤¤s°Ï»E²±¨½
»O¥_¥«¤¤¤s°Ï¶°­^¨½	¶À«Ø°ê	»O¥_¥«¤¤¤s°Ï¶°­^¨½¶À«Ø°ê	1	1	1959	¤¤°ê°ê¥ÁÄÒ	1	0	1517	0.4433	0	0	2	KMT	0	0.19651489	0.50631845	1.975041597	»O¥_¥«¤¤¤s°Ï¶°­^¨½
»O¥_¥«¤¤¤s°Ï¶°­^¨½	¦ó³ß¶¯	»O¥_¥«¤¤¤s°Ï¶°­^¨½¦ó³ß¶¯	2	1	1944	¥Á¥D¶i¨BÄÒ	0	1	1905	0.5566	1	1	2	KMT	0	0.50631845	0.50631845	1.975041597	»O¥_¥«¤¤¤s°Ï¶°­^¨½
»O¥_¥«¤¤¤s°Ï»E¸­¨½	¬öºÑ¶¯	»O¥_¥«¤¤¤s°Ï»E¸­¨½¬öºÑ¶¯	1	1	1941	µLÄÒÄy¤Î¥¼¸g¬FÄÒ±ÀÂË	0	0	1012	0.5049	1	0	2	KMT	0	0.25492401	0.49994901	2.000203981	»O¥_¥«¤¤¤s°Ï»E¸­¨½
»O¥_¥«¤¤¤s°Ï»E¸­¨½	§d¥¿¼Ý	»O¥_¥«¤¤¤s°Ï»E¸­¨½§d¥¿¼Ý	2	1	1975	¤¤°ê°ê¥ÁÄÒ	1	0	992	0.495	0	0	2	KMT	0	0.49994901	0.49994901	2.000203981	»O¥_¥«¤¤¤s°Ï»E¸­¨½
»O¥_¥«¤¤¤s°Ï«í¦w¨½	¶À§Ó©÷	»O¥_¥«¤¤¤s°Ï«í¦w¨½¶À§Ó©÷	1	1	1973	µLÄÒÄy¤Î¥¼¸g¬FÄÒ±ÀÂË	0	0	1840	1	1	1	1	KMT	0	1	1	1	»O¥_¥«¤¤¤s°Ï«í¦w¨½
»O¥_¥«¤¤¤s°Ï´¸¥ú¨½	ªL°ö©v	»O¥_¥«¤¤¤s°Ï´¸¥ú¨½ªL°ö©v	1	1	1954	µLÄÒÄy¤Î¥¼¸g¬FÄÒ±ÀÂË	0	0	2072	1	1	0	1	KMT	0	1	1	1	»O¥_¥«¤¤¤s°Ï´¸¥ú¨½
»O¥_¥«¤¤¤s°Ï¶ê¤s¨½	¸­«Ø½÷	»O¥_¥«¤¤¤s°Ï¶ê¤s¨½¸­«Ø½÷	1	1	1966	¤¤°ê°ê¥ÁÄÒ	1	0	1578	1	1	0	1	KMT	0	1	1	1	»O¥_¥«¤¤¤s°Ï¶ê¤s¨½
»O¥_¥«¤¤¤s°Ï·sÉÜ¨½	ªL¥@Âb	»O¥_¥«¤¤¤s°Ï·sÉÜ¨½ªL¥@Âb	1	1	1956	µLÄÒÄy¤Î¥¼¸g¬FÄÒ±ÀÂË	0	0	1119	0.3954	1	1	4	KMT	0	0.15634116	0.29826164	3.352761019	»O¥_¥«¤¤¤s°Ï·sÉÜ¨½
»O¥_¥«¤¤¤s°Ï·sÉÜ¨½	¤ý®õ¯P	»O¥_¥«¤¤¤s°Ï·sÉÜ¨½¤ý®õ¯P	2	1	1952	µLÄÒÄy¤Î¥¼¸g¬FÄÒ±ÀÂË	0	0	273	0.0964	0	0	4	KMT	0	0.16563412	0.29826164	3.352761019	»O¥_¥«¤¤¤s°Ï·sÉÜ¨½
»O¥_¥«¤¤¤s°Ï·sÉÜ¨½	³¯ºa¬ì	»O¥_¥«¤¤¤s°Ï·sÉÜ¨½³¯ºa¬ì	3	1	1949	¥Á¥D¶i¨BÄÒ	0	1	839	0.2964	0	0	4	KMT	0	0.25348708	0.29826164	3.352761019	»O¥_¥«¤¤¤s°Ï·sÉÜ¨½
»O¥_¥«¤¤¤s°Ï·sÉÜ¨½	¨ô®õ¤s	»O¥_¥«¤¤¤s°Ï·sÉÜ¨½¨ô®õ¤s	4	1	1962	µLÄÒÄy¤Î¥¼¸g¬FÄÒ±ÀÂË	0	0	599	0.2116	0	0	4	KMT	0	0.29826164	0.29826164	3.352761019	»O¥_¥«¤¤¤s°Ï·sÉÜ¨½
»O¥_¥«¤¤¤s°Ï¼C¼æ¨½	²¦µL¶q	»O¥_¥«¤¤¤s°Ï¼C¼æ¨½²¦µL¶q	1	1	1957	¤¤°ê°ê¥ÁÄÒ	1	0	1629	0.752	1	1	2	KMT	0	0.565504	0.62695841	1.595002131	»O¥_¥«¤¤¤s°Ï¼C¼æ¨½
»O¥_¥«¤¤¤s°Ï¼C¼æ¨½	¦óºÖ¥\	»O¥_¥«¤¤¤s°Ï¼C¼æ¨½¦óºÖ¥\	2	1	1950	µLÄÒÄy¤Î¥¼¸g¬FÄÒ±ÀÂË	0	0	537	0.2479	0	0	2	KMT	0	0.62695841	0.62695841	1.595002131	»O¥_¥«¤¤¤s°Ï¼C¼æ¨½
»O¥_¥«¤¤¤s°Ï¤jª½¨½	ªL¼e¤¯	»O¥_¥«¤¤¤s°Ï¤jª½¨½ªL¼e¤¯	1	1	1952	¥Á¥D¶i¨BÄÒ	0	1	1683	0.3319	0	0	3	KMT	0	0.11015761	0.36264849	2.757491145	»O¥_¥«¤¤¤s°Ï¤jª½¨½
»O¥_¥«¤¤¤s°Ï¤jª½¨½	¶Àªâ	»O¥_¥«¤¤¤s°Ï¤jª½¨½¶Àªâ	2	0	1968	µLÄÒÄy¤Î¥¼¸g¬FÄÒ±ÀÂË	0	0	1079	0.2128	0	0	3	KMT	0	0.15544145	0.36264849	2.757491145	»O¥_¥«¤¤¤s°Ï¤jª½¨½
»O¥_¥«¤¤¤s°Ï¤jª½¨½	±ä¥É©[	»O¥_¥«¤¤¤s°Ï¤jª½¨½±ä¥É©[	3	1	1948	¤¤°ê°ê¥ÁÄÒ	1	0	2308	0.4552	1	1	3	KMT	0	0.36264849	0.36264849	2.757491145	»O¥_¥«¤¤¤s°Ï¤jª½¨½
»O¥_¥«¤¤¤s°Ï¦¨¥\¨½	§õ²M¤ô	»O¥_¥«¤¤¤s°Ï¦¨¥\¨½§õ²M¤ô	1	1	1951	¤¤°ê°ê¥ÁÄÒ	1	0	2546	1	1	1	1	KMT	0	1	1	1	»O¥_¥«¤¤¤s°Ï¦¨¥\¨½
»O¥_¥«¤¤¤s°Ï¥Ã¦w¨½	§õ³s¥Í	»O¥_¥«¤¤¤s°Ï¥Ã¦w¨½§õ³s¥Í	1	1	1950	µLÄÒÄy¤Î¥¼¸g¬FÄÒ±ÀÂË	0	0	2165	0.4527	0	0	2	KMT	0	0.20493729	0.50436513	1.982690596	»O¥_¥«¤¤¤s°Ï¥Ã¦w¨½
»O¥_¥«¤¤¤s°Ï¥Ã¦w¨½	¼B¬Kªø	»O¥_¥«¤¤¤s°Ï¥Ã¦w¨½¼B¬Kªø	2	1	1947	µLÄÒÄy¤Î¥¼¸g¬FÄÒ±ÀÂË	0	0	2617	0.5472	1	1	2	KMT	0	0.50436513	0.50436513	1.982690596	»O¥_¥«¤¤¤s°Ï¥Ã¦w¨½
»O¥_¥«¤¤¤s°Ï¤j¨Î¨½	²ø´Ü»Ê	»O¥_¥«¤¤¤s°Ï¤j¨Î¨½²ø´Ü»Ê	1	1	1956	¥Á¥D¶i¨BÄÒ	0	1	568	1	1	1	1	KMT	0	1	1	1	»O¥_¥«¤¤¤s°Ï¤j¨Î¨½
»O¥_¥«¤¤¤s°Ïª÷®õ¨½	´å¶i¸q	»O¥_¥«¤¤¤s°Ïª÷®õ¨½´å¶i¸q	1	1	1966	¤¤°ê°ê¥ÁÄÒ	1	0	2231	0.6783	1	1	2	KMT	0	0.46009089	0.56351745	1.774567939	»O¥_¥«¤¤¤s°Ïª÷®õ¨½
»O¥_¥«¤¤¤s°Ïª÷®õ¨½	³¹¥­¦w	»O¥_¥«¤¤¤s°Ïª÷®õ¨½³¹¥­¦w	2	1	1968	µLÄÒÄy¤Î¥¼¸g¬FÄÒ±ÀÂË	0	0	1058	0.3216	0	0	2	KMT	0	0.56351745	0.56351745	1.774567939	»O¥_¥«¤¤¤s°Ïª÷®õ¨½
»O¥_¥«¤¤¤s°Ï¥_¦w¨½	Áù§Ó¥Á	»O¥_¥«¤¤¤s°Ï¥_¦w¨½Áù§Ó¥Á	1	1	1966	µLÄÒÄy¤Î¥¼¸g¬FÄÒ±ÀÂË	0	0	133	0.0861	0	0	3	KMT	0	0.00741321	0.4535651	2.204755172	»O¥_¥«¤¤¤s°Ï¥_¦w¨½
»O¥_¥«¤¤¤s°Ï¥_¦w¨½	³¯¥Ã©¾	»O¥_¥«¤¤¤s°Ï¥_¦w¨½³¯¥Ã©¾	2	1	1944	µLÄÒÄy¤Î¥¼¸g¬FÄÒ±ÀÂË	0	0	890	0.5767	1	0	3	KMT	0	0.3399961	0.4535651	2.204755172	»O¥_¥«¤¤¤s°Ï¥_¦w¨½
»O¥_¥«¤¤¤s°Ï¥_¦w¨½	®}¼w©ô	»O¥_¥«¤¤¤s°Ï¥_¦w¨½®}¼w©ô	3	1	1948	¤¤°ê°ê¥ÁÄÒ	1	0	520	0.337	0	1	3	KMT	0	0.4535651	0.4535651	2.204755172	»O¥_¥«¤¤¤s°Ï¥_¦w¨½
»O¥_¥«¤¤¤s°Ï·s³ß¨½	§dª@¶§	»O¥_¥«¤¤¤s°Ï·s³ß¨½§dª@¶§	1	1	1961	¥Á¥D¶i¨BÄÒ	0	1	1776	0.6082	1	1	2	KMT	0	0.36990724	0.52333613	1.910817814	»O¥_¥«¤¤¤s°Ï·s³ß¨½
»O¥_¥«¤¤¤s°Ï·s³ß¨½	­JªF¶©	»O¥_¥«¤¤¤s°Ï·s³ß¨½­JªF¶©	2	1	1966	¤¤°ê°ê¥ÁÄÒ	1	0	1144	0.3917	0	0	2	KMT	0	0.52333613	0.52333613	1.910817814	»O¥_¥«¤¤¤s°Ï·s³ß¨½
»O¥_¥«¤¤¤s°Ï·sºÖ¨½	¸­®Ì«n	»O¥_¥«¤¤¤s°Ï·sºÖ¨½¸­®Ì«n	1	1	1952	¤¤°ê°ê¥ÁÄÒ	1	0	911	0.3212	0	0	2	KMT	0	0.10316944	0.56380313	1.773668763	»O¥_¥«¤¤¤s°Ï·sºÖ¨½
»O¥_¥«¤¤¤s°Ï·sºÖ¨½	µ£³Ó½÷	»O¥_¥«¤¤¤s°Ï·sºÖ¨½µ£³Ó½÷	2	1	1962	µLÄÒÄy¤Î¥¼¸g¬FÄÒ±ÀÂË	0	0	1925	0.6787	1	1	2	KMT	0	0.56380313	0.56380313	1.773668763	»O¥_¥«¤¤¤s°Ï·sºÖ¨½
»O¥_¥«¤¤¤s°ÏªQ¦¿¨½	¼B°êªv	»O¥_¥«¤¤¤s°ÏªQ¦¿¨½¼B°êªv	1	1	1957	µLÄÒÄy¤Î¥¼¸g¬FÄÒ±ÀÂË	0	0	273	0.0769	0	0	3	KMT	0	0.00591361	0.43264643	2.311356181	»O¥_¥«¤¤¤s°ÏªQ¦¿¨½
»O¥_¥«¤¤¤s°ÏªQ¦¿¨½	®}¥É¤¤	»O¥_¥«¤¤¤s°ÏªQ¦¿¨½®}¥É¤¤	2	1	1959	¤¤°ê°ê¥ÁÄÒ	1	0	1706	0.4811	1	0	3	KMT	0	0.23737082	0.43264643	2.311356181	»O¥_¥«¤¤¤s°ÏªQ¦¿¨½
»O¥_¥«¤¤¤s°ÏªQ¦¿¨½	³¯¥ÃÅ@	»O¥_¥«¤¤¤s°ÏªQ¦¿¨½³¯¥ÃÅ@	3	1	1955	µLÄÒÄy¤Î¥¼¸g¬FÄÒ±ÀÂË	0	0	1567	0.4419	0	1	3	KMT	0	0.43264643	0.43264643	2.311356181	»O¥_¥«¤¤¤s°ÏªQ¦¿¨½
»O¥_¥«¤¤¤s°Ï·s¥Í¨½	ºµ²M¾±	»O¥_¥«¤¤¤s°Ï·s¥Í¨½ºµ²M¾±	1	1	1961	¥Á¥D¶i¨BÄÒ	0	1	1437	0.4906	0	1	2	KMT	0	0.24068836	0.50007485	1.999700645	»O¥_¥«¤¤¤s°Ï·s¥Í¨½
»O¥_¥«¤¤¤s°Ï·s¥Í¨½	´¿°ê¯q	»O¥_¥«¤¤¤s°Ï·s¥Í¨½´¿°ê¯q	2	1	1967	¤¤°ê°ê¥ÁÄÒ	1	0	1492	0.5093	1	0	2	KMT	0	0.50007485	0.50007485	1.999700645	»O¥_¥«¤¤¤s°Ï·s¥Í¨½
»O¥_¥«¤¤¤s°Ï¤¤ÉÜ¨½	³¯«Ø¤¤	»O¥_¥«¤¤¤s°Ï¤¤ÉÜ¨½³¯«Ø¤¤	1	1	1973	¥Á¥D¶i¨BÄÒ	0	1	1690	0.5833	1	1	2	KMT	0	0.34023889	0.51379445	1.946303624	»O¥_¥«¤¤¤s°Ï¤¤ÉÜ¨½
»O¥_¥«¤¤¤s°Ï¤¤ÉÜ¨½	ªô¸ÖÏÉ	»O¥_¥«¤¤¤s°Ï¤¤ÉÜ¨½ªô¸ÖÏÉ	2	0	1977	¤¤°ê°ê¥ÁÄÒ	1	0	1207	0.4166	0	0	2	KMT	0	0.51379445	0.51379445	1.946303624	»O¥_¥«¤¤¤s°Ï¤¤ÉÜ¨½
»O¥_¥«¤¤¤s°Ï¦æ¬F¨½	¾G¬KµØ	»O¥_¥«¤¤¤s°Ï¦æ¬F¨½¾G¬KµØ	1	1	1951	µLÄÒÄy¤Î¥¼¸g¬FÄÒ±ÀÂË	0	0	881	0.2733	0	0	3	KMT	0	0.07469289	0.36902315	2.709857092	»O¥_¥«¤¤¤s°Ï¦æ¬F¨½
»O¥_¥«¤¤¤s°Ï¦æ¬F¨½	ªL¬K¥É	»O¥_¥«¤¤¤s°Ï¦æ¬F¨½ªL¬K¥É	2	0	1951	µLÄÒÄy¤Î¥¼¸g¬FÄÒ±ÀÂË	0	0	774	0.2401	0	0	3	KMT	0	0.1323409	0.36902315	2.709857092	»O¥_¥«¤¤¤s°Ï¦æ¬F¨½
»O¥_¥«¤¤¤s°Ï¦æ¬F¨½	¬_¸U©÷	»O¥_¥«¤¤¤s°Ï¦æ¬F¨½¬_¸U©÷	3	1	1949	¥Á¥D¶i¨BÄÒ	0	1	1568	0.4865	1	1	3	KMT	0	0.36902315	0.36902315	2.709857092	»O¥_¥«¤¤¤s°Ï¦æ¬F¨½
»O¥_¥«¤¤¤s°Ï¦æ¤¯¨½	¤ý¶i©v	»O¥_¥«¤¤¤s°Ï¦æ¤¯¨½¤ý¶i©v	1	1	1951	¤¤°ê°ê¥ÁÄÒ	1	0	2230	0.4879	0	0	2	KMT	0	0.23804641	0.50019041	1.99923865	»O¥_¥«¤¤¤s°Ï¦æ¤¯¨½
»O¥_¥«¤¤¤s°Ï¦æ¤¯¨½	³¯¸q°¶	»O¥_¥«¤¤¤s°Ï¦æ¤¯¨½³¯¸q°¶	2	1	1983	µLÄÒÄy¤Î¥¼¸g¬FÄÒ±ÀÂË	0	0	2340	0.512	1	0	2	KMT	0	0.50019041	0.50019041	1.99923865	»O¥_¥«¤¤¤s°Ï¦æ¤¯¨½
»O¥_¥«¤¤¤s°Ï¦æ§µ¨½	§f±å²N	»O¥_¥«¤¤¤s°Ï¦æ§µ¨½§f±å²N	1	1	1965	µLÄÒÄy¤Î¥¼¸g¬FÄÒ±ÀÂË	0	0	1107	0.4706	0	0	2	KMT	0	0.22146436	0.50162285	1.993529601	»O¥_¥«¤¤¤s°Ï¦æ§µ¨½
»O¥_¥«¤¤¤s°Ï¦æ§µ¨½	±i¯Â¶{	»O¥_¥«¤¤¤s°Ï¦æ§µ¨½±i¯Â¶{	2	1	1947	¤¤°ê°ê¥ÁÄÒ	1	0	1245	0.5293	1	1	2	KMT	0	0.50162285	0.50162285	1.993529601	»O¥_¥«¤¤¤s°Ï¦æ§µ¨½
»O¥_¥«¤¤¤s°Ï¤U°ñ¨½	¤ýÖq¦m	»O¥_¥«¤¤¤s°Ï¤U°ñ¨½¤ýÖq¦m	1	0	1951	¥Á¥D¶i¨BÄÒ	0	1	1820	0.4268	1	1	3	KMT	0	0.18215824	0.35828429	2.791079676	»O¥_¥«¤¤¤s°Ï¤U°ñ¨½
»O¥_¥«¤¤¤s°Ï¤U°ñ¨½	ªLª÷¼w	»O¥_¥«¤¤¤s°Ï¤U°ñ¨½ªLª÷¼w	2	1	1957	µLÄÒÄy¤Î¥¼¸g¬FÄÒ±ÀÂË	0	0	893	0.2094	0	0	3	KMT	0	0.2260066	0.35828429	2.791079676	»O¥_¥«¤¤¤s°Ï¤U°ñ¨½
»O¥_¥«¤¤¤s°Ï¤U°ñ¨½	³¯²Kºa	»O¥_¥«¤¤¤s°Ï¤U°ñ¨½³¯²Kºa	3	1	1957	¤¤°ê°ê¥ÁÄÒ	1	0	1551	0.3637	0	0	3	KMT	0	0.35828429	0.35828429	2.791079676	»O¥_¥«¤¤¤s°Ï¤U°ñ¨½
»O¥_¥«¤¤¤s°Ï¦¿¹ç¨½	®}«H¬w	»O¥_¥«¤¤¤s°Ï¦¿¹ç¨½®}«H¬w	1	1	1962	µLÄÒÄy¤Î¥¼¸g¬FÄÒ±ÀÂË	0	0	3394	1	1	1	1	KMT	0	1	1	1	»O¥_¥«¤¤¤s°Ï¦¿¹ç¨½
»O¥_¥«¤¤¤s°Ï¦¿¤s¨½	ªL¸Î¬ü	»O¥_¥«¤¤¤s°Ï¦¿¤s¨½ªL¸Î¬ü	1	0	1961	¥Á¥D¶i¨BÄÒ	0	1	1789	0.4237	0	0	2	KMT	0	0.17952169	0.51152813	1.954926702	»O¥_¥«¤¤¤s°Ï¦¿¤s¨½
»O¥_¥«¤¤¤s°Ï¦¿¤s¨½	¼B¶§¼C	»O¥_¥«¤¤¤s°Ï¦¿¤s¨½¼B¶§¼C	2	1	1954	¤¤°ê°ê¥ÁÄÒ	1	0	2433	0.5762	1	1	2	KMT	0	0.51152813	0.51152813	1.954926702	»O¥_¥«¤¤¤s°Ï¦¿¤s¨½
»O¥_¥«¤¤¤s°Ï¤¤¦N¨½	ªL¼w³Ó	»O¥_¥«¤¤¤s°Ï¤¤¦N¨½ªL¼w³Ó	1	1	1957	¥Á¥D¶i¨BÄÒ	0	1	1796	0.5913	1	1	3	KMT	0	0.34963569	0.43309166	2.308980044	»O¥_¥«¤¤¤s°Ï¤¤¦N¨½
»O¥_¥«¤¤¤s°Ï¤¤¦N¨½	µ£¤å¦¨	»O¥_¥«¤¤¤s°Ï¤¤¦N¨½µ£¤å¦¨	2	1	1949	µLÄÒÄy¤Î¥¼¸g¬FÄÒ±ÀÂË	0	0	630	0.2074	0	0	3	KMT	0	0.39265045	0.43309166	2.308980044	»O¥_¥«¤¤¤s°Ï¤¤¦N¨½
»O¥_¥«¤¤¤s°Ï¤¤¦N¨½	§d¯À¤¦	»O¥_¥«¤¤¤s°Ï¤¤¦N¨½§d¯À¤¦	3	0	1950	¤¤°ê°ê¥ÁÄÒ	1	0	611	0.2011	0	0	3	KMT	0	0.43309166	0.43309166	2.308980044	»O¥_¥«¤¤¤s°Ï¤¤¦N¨½
»O¥_¥«¤¤¤s°Ï¤¤­ì¨½	§d¨Ô	»O¥_¥«¤¤¤s°Ï¤¤­ì¨½§d¨Ô	1	1	1956	¤¤°ê°ê¥ÁÄÒ	1	0	1166	0.4127	0	0	2	KMT	0	0.17032129	0.51512513	1.941275899	»O¥_¥«¤¤¤s°Ï¤¤­ì¨½
»O¥_¥«¤¤¤s°Ï¤¤­ì¨½	Ä¬°ê©÷	»O¥_¥«¤¤¤s°Ï¤¤­ì¨½Ä¬°ê©÷	2	1	1955	¥Á¥D¶i¨BÄÒ	0	1	1659	0.5872	1	1	2	KMT	0	0.51512513	0.51512513	1.941275899	»O¥_¥«¤¤¤s°Ï¤¤­ì¨½
»O¥_¥«¤¤¤s°Ï¿³¨È¨½	ªLªÚÁ¨	»O¥_¥«¤¤¤s°Ï¿³¨È¨½ªLªÚÁ¨	1	0	1954	¤¤°ê°ê¥ÁÄÒ	1	0	2310	1	1	1	1	KMT	0	1	1	1	»O¥_¥«¤¤¤s°Ï¿³¨È¨½
»O¥_¥«¤¤¤s°Ï¤¤¥¡¨½	§õ¤Î¤Ñ	»O¥_¥«¤¤¤s°Ï¤¤¥¡¨½§õ¤Î¤Ñ	1	1	1949	¤¤°ê°ê¥ÁÄÒ	1	0	960	0.4648	1	1	3	KMT	0	0.21603904	0.41580132	2.40499477	»O¥_¥«¤¤¤s°Ï¤¤¥¡¨½
»O¥_¥«¤¤¤s°Ï¤¤¥¡¨½	¥C¥x§Q	»O¥_¥«¤¤¤s°Ï¤¤¥¡¨½¥C¥x§Q	2	1	1957	µLÄÒÄy¤Î¥¼¸g¬FÄÒ±ÀÂË	0	0	205	0.0992	0	0	3	KMT	0	0.22587968	0.41580132	2.40499477	»O¥_¥«¤¤¤s°Ï¤¤¥¡¨½
»O¥_¥«¤¤¤s°Ï¤¤¥¡¨½	³¯¥Ã¦¨	»O¥_¥«¤¤¤s°Ï¤¤¥¡¨½³¯¥Ã¦¨	3	1	1957	µLÄÒÄy¤Î¥¼¸g¬FÄÒ±ÀÂË	0	0	900	0.4358	0	0	3	KMT	0	0.41580132	0.41580132	2.40499477	»O¥_¥«¤¤¤s°Ï¤¤¥¡¨½
»O¥_¥«¤¤¤s°Ï¦¶ÃL¨½	²øÀAÀs	»O¥_¥«¤¤¤s°Ï¦¶ÃL¨½²øÀAÀs	1	1	1950	µLÄÒÄy¤Î¥¼¸g¬FÄÒ±ÀÂË	0	0	1779	0.5467	1	0	2	KMT	0	0.29888089	0.50427113	1.983060184	»O¥_¥«¤¤¤s°Ï¦¶ÃL¨½
»O¥_¥«¤¤¤s°Ï¦¶ÃL¨½	³¯¶}¤¯	»O¥_¥«¤¤¤s°Ï¦¶ÃL¨½³¯¶}¤¯	2	1	1921	¤¤°ê°ê¥ÁÄÒ	1	0	1475	0.4532	0	1	2	KMT	0	0.50427113	0.50427113	1.983060184	»O¥_¥«¤¤¤s°Ï¦¶ÃL¨½
»O¥_¥«¤¤¤s°ÏÀs¬w¨½	À¹§J±j	»O¥_¥«¤¤¤s°ÏÀs¬w¨½À¹§J±j	1	1	1953	¤¤°ê°ê¥ÁÄÒ	1	0	1669	0.5595	1	1	2	KMT	0	0.31304025	0.50699241	1.972416116	»O¥_¥«¤¤¤s°ÏÀs¬w¨½
»O¥_¥«¤¤¤s°ÏÀs¬w¨½	ºµÆB©P	»O¥_¥«¤¤¤s°ÏÀs¬w¨½ºµÆB©P	2	1	1956	µLÄÒÄy¤Î¥¼¸g¬FÄÒ±ÀÂË	0	0	1314	0.4404	0	0	2	KMT	0	0.50699241	0.50699241	1.972416116	»O¥_¥«¤¤¤s°ÏÀs¬w¨½
»O¥_¥«¤¤¤s°Ï¦¶¶é¨½	§õªLÄ£	»O¥_¥«¤¤¤s°Ï¦¶¶é¨½§õªLÄ£	1	1	1955	µLÄÒÄy¤Î¥¼¸g¬FÄÒ±ÀÂË	0	0	469	0.2126	0	0	3	KMT	0	0.04519876	0.3646734	2.742179715	»O¥_¥«¤¤¤s°Ï¦¶¶é¨½
»O¥_¥«¤¤¤s°Ï¦¶¶é¨½	®]¦X¿³	»O¥_¥«¤¤¤s°Ï¦¶¶é¨½®]¦X¿³	2	1	1951	¥Á¥D¶i¨BÄÒ	0	1	1021	0.463	1	1	3	KMT	0	0.25956776	0.3646734	2.742179715	»O¥_¥«¤¤¤s°Ï¦¶¶é¨½
»O¥_¥«¤¤¤s°Ï¦¶¶é¨½	±i¥@¼y	»O¥_¥«¤¤¤s°Ï¦¶¶é¨½±i¥@¼y	3	1	1976	¤¤°ê°ê¥ÁÄÒ	1	0	715	0.3242	0	0	3	KMT	0	0.3646734	0.3646734	2.742179715	»O¥_¥«¤¤¤s°Ï¦¶¶é¨½
»O¥_¥«¤¤¤s°Ï°ñÀY¨½	ªL»Ê²M	»O¥_¥«¤¤¤s°Ï°ñÀY¨½ªL»Ê²M	1	1	1953	¥Á¥D¶i¨BÄÒ	0	1	1135	0.5715	1	1	2	KMT	0	0.32661225	0.51013881	1.96025078	»O¥_¥«¤¤¤s°Ï°ñÀY¨½
»O¥_¥«¤¤¤s°Ï°ñÀY¨½	§d¸tº}	»O¥_¥«¤¤¤s°Ï°ñÀY¨½§d¸tº}	2	1	1951	¤¤°ê°ê¥ÁÄÒ	1	0	851	0.4284	0	0	2	KMT	0	0.51013881	0.51013881	1.96025078	»O¥_¥«¤¤¤s°Ï°ñÀY¨½
»O¥_¥«¤¤¤s°Ï¦¶±[¨½	°ª»ÊÂE	»O¥_¥«¤¤¤s°Ï¦¶±[¨½°ª»ÊÂE	1	1	1958	¤¤°ê°ê¥ÁÄÒ	1	0	1046	0.6744	1	1	2	KMT	0	0.45481536	0.56076561	1.78327626	»O¥_¥«¤¤¤s°Ï¦¶±[¨½
»O¥_¥«¤¤¤s°Ï¦¶±[¨½	³¯¥¿«H	»O¥_¥«¤¤¤s°Ï¦¶±[¨½³¯¥¿«H	2	1	1970	µLÄÒÄy¤Î¥¼¸g¬FÄÒ±ÀÂË	0	0	505	0.3255	0	0	2	KMT	0	0.56076561	0.56076561	1.78327626	»O¥_¥«¤¤¤s°Ï¦¶±[¨½
»O¥_¥«¤¤¤s°Ï¤O¦æ¨½	ªL¤Ñ¾±	»O¥_¥«¤¤¤s°Ï¤O¦æ¨½ªL¤Ñ¾±	1	1	1948	¤¤°ê°ê¥ÁÄÒ	1	0	1010	0.3178	0	0	3	KMT	0	0.10099684	0.34860885	2.868544502	»O¥_¥«¤¤¤s°Ï¤O¦æ¨½
»O¥_¥«¤¤¤s°Ï¤O¦æ¨½	¬ö¤å²M	»O¥_¥«¤¤¤s°Ï¤O¦æ¨½¬ö¤å²M	2	1	1952	¥Á¥D¶i¨BÄÒ	0	1	809	0.2545	0	0	3	KMT	0	0.16576709	0.34860885	2.868544502	»O¥_¥«¤¤¤s°Ï¤O¦æ¨½
»O¥_¥«¤¤¤s°Ï¤O¦æ¨½	¨H»È¼w	»O¥_¥«¤¤¤s°Ï¤O¦æ¨½¨H»È¼w	3	1	1942	µLÄÒÄy¤Î¥¼¸g¬FÄÒ±ÀÂË	0	0	1359	0.4276	1	1	3	KMT	0	0.34860885	0.34860885	2.868544502	»O¥_¥«¤¤¤s°Ï¤O¦æ¨½
»O¥_¥«¤¤¤s°Ï´_µØ¨½	¶À®i½÷	»O¥_¥«¤¤¤s°Ï´_µØ¨½¶À®i½÷	1	1	1952	¤¤°ê°ê¥ÁÄÒ	1	0	1933	1	1	1	1	KMT	0	1	1	1	»O¥_¥«¤¤¤s°Ï´_µØ¨½
»O¥_¥«¤j¦P°Ï¥É¬u¨½	³¯?¾ð	»O¥_¥«¤j¦P°Ï¥É¬u¨½³¯?¾ð	1	1	1940	¤¤°ê°ê¥ÁÄÒ	1	0	697	0.4201	1	1	3	KMT	0	0.17648401	0.34854635	2.869058878	»O¥_¥«¤j¦P°Ï¥É¬u¨½
»O¥_¥«¤j¦P°Ï¥É¬u¨½	ªô´I¶¯	»O¥_¥«¤j¦P°Ï¥É¬u¨½ªô´I¶¯	2	1	1943	µLÄÒÄy¤Î¥¼¸g¬FÄÒ±ÀÂË	0	0	555	0.3345	0	0	3	KMT	0	0.28837426	0.34854635	2.869058878	»O¥_¥«¤j¦P°Ï¥É¬u¨½
»O¥_¥«¤j¦P°Ï¥É¬u¨½	³\ºaµØ	»O¥_¥«¤j¦P°Ï¥É¬u¨½³\ºaµØ	3	1	1949	µLÄÒÄy¤Î¥¼¸g¬FÄÒ±ÀÂË	0	0	407	0.2453	0	0	3	KMT	0	0.34854635	0.34854635	2.869058878	»O¥_¥«¤j¦P°Ï¥É¬u¨½
»O¥_¥«¤j¦P°Ï«Ø©ú¨½	§õ­õ©÷	»O¥_¥«¤j¦P°Ï«Ø©ú¨½§õ­õ©÷	1	1	1962	¤¤°ê°ê¥ÁÄÒ	1	0	746	0.4085	0	0	2	KMT	0	0.16687225	0.51662621	1.935635437	»O¥_¥«¤j¦P°Ï«Ø©ú¨½
»O¥_¥«¤j¦P°Ï«Ø©ú¨½	³¯¥¿½å	»O¥_¥«¤j¦P°Ï«Ø©ú¨½³¯¥¿½å	2	1	1953	¥Á¥D¶i¨BÄÒ	0	1	1080	0.5914	1	1	2	KMT	0	0.51662621	0.51662621	1.935635437	»O¥_¥«¤j¦P°Ï«Ø©ú¨½
»O¥_¥«¤j¦P°Ï«Ø¥\¨½	©P§Ó½å	»O¥_¥«¤j¦P°Ï«Ø¥\¨½©P§Ó½å	1	1	1958	¥Á¥D¶i¨BÄÒ	0	1	1309	0.5267	1	1	2	KMT	0	0.27741289	0.50133113	1.994689618	»O¥_¥«¤j¦P°Ï«Ø¥\¨½
»O¥_¥«¤j¦P°Ï«Ø¥\¨½	ÁÂ¤å²»	»O¥_¥«¤j¦P°Ï«Ø¥\¨½ÁÂ¤å²»	2	1	1960	¤¤°ê°ê¥ÁÄÒ	1	0	1176	0.4732	0	0	2	KMT	0	0.50133113	0.50133113	1.994689618	»O¥_¥«¤j¦P°Ï«Ø¥\¨½
»O¥_¥«¤j¦P°Ï«Ø®õ¨½	³¯ÄPµ{	»O¥_¥«¤j¦P°Ï«Ø®õ¨½³¯ÄPµ{	1	1	1967	¥Á¥D¶i¨BÄÒ	0	1	1024	0.5039	1	0	2	KMT	0	0.25391521	0.49993121	2.000275198	»O¥_¥«¤j¦P°Ï«Ø®õ¨½
»O¥_¥«¤j¦P°Ï«Ø®õ¨½	©P®ä³ó	»O¥_¥«¤j¦P°Ï«Ø®õ¨½©P®ä³ó	2	1	1946	¤¤°ê°ê¥ÁÄÒ	1	0	1008	0.496	0	1	2	KMT	0	0.49993121	0.49993121	2.000275198	»O¥_¥«¤j¦P°Ï«Ø®õ¨½
»O¥_¥«¤j¦P°Ï¥Ã¼Ö¨½	³¯»ñ´­	»O¥_¥«¤j¦P°Ï¥Ã¼Ö¨½³¯»ñ´­	1	1	1950	¤¤°ê°ê¥ÁÄÒ	1	0	1328	0.4375	0	1	2	KMT	0	0.19140625	0.50770001	1.969667087	»O¥_¥«¤j¦P°Ï¥Ã¼Ö¨½
»O¥_¥«¤j¦P°Ï¥Ã¼Ö¨½	³¯ºÖ¬K	»O¥_¥«¤j¦P°Ï¥Ã¼Ö¨½³¯ºÖ¬K	2	1	1947	µLÄÒÄy¤Î¥¼¸g¬FÄÒ±ÀÂË	0	0	1707	0.5624	1	0	2	KMT	0	0.50770001	0.50770001	1.969667087	»O¥_¥«¤j¦P°Ï¥Ã¼Ö¨½
»O¥_¥«¤j¦P°Ï´Â¶§¨½	¼Bº~´Ü	»O¥_¥«¤j¦P°Ï´Â¶§¨½¼Bº~´Ü	1	1	1947	¤¤°ê°ê¥ÁÄÒ	1	0	1013	0.464	0	0	2	KMT	0	0.215296	0.50248481	1.99010991	»O¥_¥«¤j¦P°Ï´Â¶§¨½
»O¥_¥«¤j¦P°Ï´Â¶§¨½	¾G¸q¶¯	»O¥_¥«¤j¦P°Ï´Â¶§¨½¾G¸q¶¯	2	1	1944	µLÄÒÄy¤Î¥¼¸g¬FÄÒ±ÀÂË	0	0	1170	0.5359	1	1	2	KMT	0	0.50248481	0.50248481	1.99010991	»O¥_¥«¤j¦P°Ï´Â¶§¨½
»O¥_¥«¤j¦P°Ï¬P©ú¨½	§õ¨q¨k	»O¥_¥«¤j¦P°Ï¬P©ú¨½§õ¨q¨k	1	1	1941	¥Á¥D¶i¨BÄÒ	0	1	2332	1	1	1	1	KMT	0	1	1	1	»O¥_¥«¤j¦P°Ï¬P©ú¨½
»O¥_¥«¤j¦P°Ï¥ú¯à¨½	°ª²Q´D	»O¥_¥«¤j¦P°Ï¥ú¯à¨½°ª²Q´D	1	0	1966	¤¤°ê°ê¥ÁÄÒ	1	0	584	0.1911	0	0	3	KMT	0	0.03651921	0.37291526	2.681574361	»O¥_¥«¤j¦P°Ï¥ú¯à¨½
»O¥_¥«¤j¦P°Ï¥ú¯à¨½	³¯ÀR¸a	»O¥_¥«¤j¦P°Ï¥ú¯à¨½³¯ÀR¸a	2	0	1975	¥Á¥D¶i¨BÄÒ	0	1	1445	0.4729	1	0	3	KMT	0	0.26015362	0.37291526	2.681574361	»O¥_¥«¤j¦P°Ï¥ú¯à¨½
»O¥_¥«¤j¦P°Ï¥ú¯à¨½	½²ªZ¶¯	»O¥_¥«¤j¦P°Ï¥ú¯à¨½½²ªZ¶¯	3	1	1942	µLÄÒÄy¤Î¥¼¸g¬FÄÒ±ÀÂË	0	0	1026	0.3358	0	0	3	KMT	0	0.37291526	0.37291526	2.681574361	»O¥_¥«¤j¦P°Ï¥ú¯à¨½
»O¥_¥«¤j¦P°Ï¤j¦³¨½	¤ý«T§»	»O¥_¥«¤j¦P°Ï¤j¦³¨½¤ý«T§»	1	1	1963	¤¤°ê°ê¥ÁÄÒ	1	0	998	0.3444	0	0	2	KMT	0	0.11861136	0.54829161	1.823846985	»O¥_¥«¤j¦P°Ï¤j¦³¨½
»O¥_¥«¤j¦P°Ï¤j¦³¨½	³\´I¥Ð	»O¥_¥«¤j¦P°Ï¤j¦³¨½³\´I¥Ð	2	1	1941	¥Á¥D¶i¨BÄÒ	0	1	1899	0.6555	1	1	2	KMT	0	0.54829161	0.54829161	1.823846985	»O¥_¥«¤j¦P°Ï¤j¦³¨½
»O¥_¥«¤j¦P°Ï©µ¥­¨½	³¢¸q¿³	»O¥_¥«¤j¦P°Ï©µ¥­¨½³¢¸q¿³	1	1	1948	µLÄÒÄy¤Î¥¼¸g¬FÄÒ±ÀÂË	0	0	1675	1	1	1	1	KMT	0	1	1	1	»O¥_¥«¤j¦P°Ï©µ¥­¨½
»O¥_¥«¤j¦P°ÏÂù³s¨½	³¯°ö´Ë	»O¥_¥«¤j¦P°ÏÂù³s¨½³¯°ö´Ë	1	1	1950	µLÄÒÄy¤Î¥¼¸g¬FÄÒ±ÀÂË	0	0	290	0.0557	0	0	4	KMT	0	0.00310249	0.46253502	2.161998458	»O¥_¥«¤j¦P°ÏÂù³s¨½
»O¥_¥«¤j¦P°ÏÂù³s¨½	ªL©w¨¹	»O¥_¥«¤j¦P°ÏÂù³s¨½ªL©w¨¹	2	1	1956	µLÄÒÄy¤Î¥¼¸g¬FÄÒ±ÀÂË	0	0	202	0.0388	0	0	4	KMT	0	0.00460793	0.46253502	2.161998458	»O¥_¥«¤j¦P°ÏÂù³s¨½
»O¥_¥«¤j¦P°ÏÂù³s¨½	¬x®¶ùÚ	»O¥_¥«¤j¦P°ÏÂù³s¨½¬x®¶ùÚ	3	1	1962	¥Á¥D¶i¨BÄÒ	0	1	3162	0.6078	1	1	4	KMT	0	0.37402877	0.46253502	2.161998458	»O¥_¥«¤j¦P°ÏÂù³s¨½
»O¥_¥«¤j¦P°ÏÂù³s¨½	³\?»Ç	»O¥_¥«¤j¦P°ÏÂù³s¨½³\?»Ç	4	1	1954	¤¤°ê°ê¥ÁÄÒ	1	0	1548	0.2975	0	0	4	KMT	0	0.46253502	0.46253502	2.161998458	»O¥_¥«¤j¦P°ÏÂù³s¨½
»O¥_¥«¤j¦P°Ï«nªÚ¨½	ªLª÷Äl	»O¥_¥«¤j¦P°Ï«nªÚ¨½ªLª÷Äl	1	1	1954	¤¤°ê°ê¥ÁÄÒ	1	0	809	0.3694	0	0	2	KMT	0	0.13645636	0.53398661	1.872706134	»O¥_¥«¤j¦P°Ï«nªÚ¨½
»O¥_¥«¤j¦P°Ï«nªÚ¨½	¿à®}¥ÉªK	»O¥_¥«¤j¦P°Ï«nªÚ¨½¿à®}¥ÉªK	2	0	1954	¥Á¥D¶i¨BÄÒ	0	1	1381	0.6305	1	1	2	KMT	0	0.53398661	0.53398661	1.872706134	»O¥_¥«¤j¦P°Ï«nªÚ¨½
»O¥_¥«¤j¦P°Ï¥ÁÅv¨½	³¯¥É¤k	»O¥_¥«¤j¦P°Ï¥ÁÅv¨½³¯¥É¤k	1	0	1953	¤¤°ê°ê¥ÁÄÒ	1	0	2689	1	1	1	1	KMT	0	1	1	1	»O¥_¥«¤j¦P°Ï¥ÁÅv¨½
»O¥_¥«¤j¦P°Ï´º¬P¨½	¨L±Ò½å	»O¥_¥«¤j¦P°Ï´º¬P¨½¨L±Ò½å	1	1	1958	µLÄÒÄy¤Î¥¼¸g¬FÄÒ±ÀÂË	0	0	554	0.3357	0	0	3	KMT	0	0.11269449	0.3631969	2.753327465	»O¥_¥«¤j¦P°Ï´º¬P¨½
»O¥_¥«¤j¦P°Ï´º¬P¨½	±i´f¶²	»O¥_¥«¤j¦P°Ï´º¬P¨½±i´f¶²	2	0	1978	¥Á¥D¶i¨BÄÒ	0	1	750	0.4545	1	0	3	KMT	0	0.31926474	0.3631969	2.753327465	»O¥_¥«¤j¦P°Ï´º¬P¨½
»O¥_¥«¤j¦P°Ï´º¬P¨½	·¨·R¬Ã	»O¥_¥«¤j¦P°Ï´º¬P¨½·¨·R¬Ã	3	0	1963	µLÄÒÄy¤Î¥¼¸g¬FÄÒ±ÀÂË	0	0	346	0.2096	0	0	3	KMT	0	0.3631969	0.3631969	2.753327465	»O¥_¥«¤j¦P°Ï´º¬P¨½
»O¥_¥«¤j¦P°Ï¶©©M¨½	§d©ú¾Ç	»O¥_¥«¤j¦P°Ï¶©©M¨½§d©ú¾Ç	1	1	1947	¥Á¥D¶i¨BÄÒ	0	1	767	0.4304	0	0	2	KMT	0	0.18524416	0.50957441	1.962421936	»O¥_¥«¤j¦P°Ï¶©©M¨½
»O¥_¥«¤j¦P°Ï¶©©M¨½	·¨©v¾Ë	»O¥_¥«¤j¦P°Ï¶©©M¨½·¨©v¾Ë	2	1	1961	µLÄÒÄy¤Î¥¼¸g¬FÄÒ±ÀÂË	0	0	1015	0.5695	1	0	2	KMT	0	0.50957441	0.50957441	1.962421936	»O¥_¥«¤j¦P°Ï¶©©M¨½
»O¥_¥«¤j¦P°Ï½´µÜ¨½	¦ó­^½÷	»O¥_¥«¤j¦P°Ï½´µÜ¨½¦ó­^½÷	1	1	1959	¥Á¥D¶i¨BÄÒ	0	1	1308	0.4787	1	0	3	KMT	0	0.22915369	0.43739254	2.286275847	»O¥_¥«¤j¦P°Ï½´µÜ¨½
»O¥_¥«¤j¦P°Ï½´µÜ¨½	¬I¤Ñ¤@	»O¥_¥«¤j¦P°Ï½´µÜ¨½¬I¤Ñ¤@	2	1	1957	µLÄÒÄy¤Î¥¼¸g¬FÄÒ±ÀÂË	0	0	1232	0.4509	0	1	3	KMT	0	0.4324645	0.43739254	2.286275847	»O¥_¥«¤j¦P°Ï½´µÜ¨½
»O¥_¥«¤j¦P°Ï½´µÜ¨½	ªô¥@¶¯	»O¥_¥«¤j¦P°Ï½´µÜ¨½ªô¥@¶¯	3	1	1960	µLÄÒÄy¤Î¥¼¸g¬FÄÒ±ÀÂË	0	0	192	0.0702	0	0	3	KMT	0	0.43739254	0.43739254	2.286275847	»O¥_¥«¤j¦P°Ï½´µÜ¨½
»O¥_¥«¤j¦P°Ï°ê¶¶¨½	³¯¿o¼z	»O¥_¥«¤j¦P°Ï°ê¶¶¨½³¯¿o¼z	1	0	1954	¥Á¥D¶i¨BÄÒ	0	1	1631	1	1	1	1	KMT	0	1	1	1	»O¥_¥«¤j¦P°Ï°ê¶¶¨½
»O¥_¥«¤j¦P°Ï°ê¼y¨½	§d¯®¶Q	»O¥_¥«¤j¦P°Ï°ê¼y¨½§d¯®¶Q	1	1	1951	¤¤°ê°ê¥ÁÄÒ	1	0	1165	0.4972	0	1	2	KMT	0	0.24720784	0.49991513	2.000339538	»O¥_¥«¤j¦P°Ï°ê¼y¨½
»O¥_¥«¤j¦P°Ï°ê¼y¨½	°ª¤j³°	»O¥_¥«¤j¦P°Ï°ê¼y¨½°ª¤j³°	2	1	1956	¥Á¥D¶i¨BÄÒ	0	1	1178	0.5027	1	0	2	KMT	0	0.49991513	0.49991513	2.000339538	»O¥_¥«¤j¦P°Ï°ê¼y¨½
»O¥_¥«¤j¦P°Ï´­¶®¨½	§d®¶©ú	»O¥_¥«¤j¦P°Ï´­¶®¨½§d®¶©ú	1	1	1953	µLÄÒÄy¤Î¥¼¸g¬FÄÒ±ÀÂË	0	0	1780	1	1	1	1	KMT	0	1	1	1	»O¥_¥«¤j¦P°Ï´­¶®¨½
»O¥_¥«¤j¦P°Ï´µ¤å¨½	§õ©v¦¨	»O¥_¥«¤j¦P°Ï´µ¤å¨½§õ©v¦¨	1	1	1944	¤¤°ê°ê¥ÁÄÒ	1	0	1380	0.4394	0	1	2	KMT	0	0.19307236	0.50723261	1.971482078	»O¥_¥«¤j¦P°Ï´µ¤å¨½
»O¥_¥«¤j¦P°Ï´µ¤å¨½	¦¿³·­ë	»O¥_¥«¤j¦P°Ï´µ¤å¨½¦¿³·­ë	2	0	1951	¥Á¥D¶i¨BÄÒ	0	1	1760	0.5605	1	0	2	KMT	0	0.50723261	0.50723261	1.971482078	»O¥_¥«¤j¦P°Ï´µ¤å¨½
»O¥_¥«¤j¦P°Ï¾F¦¿¨½	¤ý´f	»O¥_¥«¤j¦P°Ï¾F¦¿¨½¤ý´f	1	1	1942	¤¤°ê°ê¥ÁÄÒ	1	0	1655	0.4241	0	0	2	KMT	0	0.17986081	0.51140645	1.955391841	»O¥_¥«¤j¦P°Ï¾F¦¿¨½
»O¥_¥«¤j¦P°Ï¾F¦¿¨½	³¯àT²»	»O¥_¥«¤j¦P°Ï¾F¦¿¨½³¯àT²»	2	1	1964	¥Á¥D¶i¨BÄÒ	0	1	2247	0.5758	1	1	2	KMT	0	0.51140645	0.51140645	1.955391841	»O¥_¥«¤j¦P°Ï¾F¦¿¨½
»O¥_¥«¤j¦P°Ï¦Ü¸t¨½	§õ¯À¯u	»O¥_¥«¤j¦P°Ï¦Ü¸t¨½§õ¯À¯u	1	0	1948	¤¤°ê°ê¥ÁÄÒ	1	0	1969	0.4637	0	0	2	KMT	0	0.21501769	0.50252813	1.989938354	»O¥_¥«¤j¦P°Ï¦Ü¸t¨½
»O¥_¥«¤j¦P°Ï¦Ü¸t¨½	¤ý²M¼Ð	»O¥_¥«¤j¦P°Ï¦Ü¸t¨½¤ý²M¼Ð	2	1	1948	¥Á¥D¶i¨BÄÒ	0	1	2277	0.5362	1	1	2	KMT	0	0.50252813	0.50252813	1.989938354	»O¥_¥«¤j¦P°Ï¦Ü¸t¨½
»O¥_¥«¤j¦P°Ï¦Ñ®v¨½	³¯ªFºa	»O¥_¥«¤j¦P°Ï¦Ñ®v¨½³¯ªFºa	1	1	1958	µLÄÒÄy¤Î¥¼¸g¬FÄÒ±ÀÂË	0	0	1799	0.5333	1	1	3	KMT	0	0.28440889	0.40022867	2.498571629	»O¥_¥«¤j¦P°Ï¦Ñ®v¨½
»O¥_¥«¤j¦P°Ï¦Ñ®v¨½	§õ¥@¿A	»O¥_¥«¤j¦P°Ï¦Ñ®v¨½§õ¥@¿A	2	1	1965	¥Á¥D¶i¨BÄÒ	0	1	986	0.2923	0	0	3	KMT	0	0.36984818	0.40022867	2.498571629	»O¥_¥«¤j¦P°Ï¦Ñ®v¨½
»O¥_¥«¤j¦P°Ï¦Ñ®v¨½	ªô¤ô·½	»O¥_¥«¤j¦P°Ï¦Ñ®v¨½ªô¤ô·½	3	1	1957	µLÄÒÄy¤Î¥¼¸g¬FÄÒ±ÀÂË	0	0	588	0.1743	0	0	3	KMT	0	0.40022867	0.40022867	2.498571629	»O¥_¥«¤j¦P°Ï¦Ñ®v¨½
»O¥_¥«¤j¦P°Ï­«¼y¨½	¥Õ±Ò®p	»O¥_¥«¤j¦P°Ï­«¼y¨½¥Õ±Ò®p	1	1	1965	µLÄÒÄy¤Î¥¼¸g¬FÄÒ±ÀÂË	0	0	1348	0.3624	0	0	3	KMT	0	0.13133376	0.37640722	2.65669718	»O¥_¥«¤j¦P°Ï­«¼y¨½
»O¥_¥«¤j¦P°Ï­«¼y¨½	¶³¥Ã¸t	»O¥_¥«¤j¦P°Ï­«¼y¨½¶³¥Ã¸t	2	1	1956	µLÄÒÄy¤Î¥¼¸g¬FÄÒ±ÀÂË	0	0	647	0.1739	0	0	3	KMT	0	0.16157497	0.37640722	2.65669718	»O¥_¥«¤j¦P°Ï­«¼y¨½
»O¥_¥«¤j¦P°Ï­«¼y¨½	²ø«T¤ý	»O¥_¥«¤j¦P°Ï­«¼y¨½²ø«T¤ý	3	1	1955	µLÄÒÄy¤Î¥¼¸g¬FÄÒ±ÀÂË	0	0	1724	0.4635	1	1	3	KMT	0	0.37640722	0.37640722	2.65669718	»O¥_¥«¤j¦P°Ï­«¼y¨½
»O¥_¥«¤j¦P°Ï«O¦w¨½	³¯¥Õ¤d	»O¥_¥«¤j¦P°Ï«O¦w¨½³¯¥Õ¤d	1	1	1969	µLÄÒÄy¤Î¥¼¸g¬FÄÒ±ÀÂË	0	0	1024	0.4006	0	0	2	KMT	0	0.16048036	0.51964085	1.924406059	»O¥_¥«¤j¦P°Ï«O¦w¨½
»O¥_¥«¤j¦P°Ï«O¦w¨½	±i½á¯ß	»O¥_¥«¤j¦P°Ï«O¦w¨½±i½á¯ß	2	0	1956	¥Á¥D¶i¨BÄÒ	0	1	1532	0.5993	1	1	2	KMT	0	0.51964085	0.51964085	1.924406059	»O¥_¥«¤j¦P°Ï«O¦w¨½
»O¥_¥«¤¤¥¿°Ï¤ô·½¨½	³¯³{¤¤	»O¥_¥«¤¤¥¿°Ï¤ô·½¨½³¯³{¤¤	1	1	1955	¥Á¥D¶i¨BÄÒ	0	1	262	0.1586	0	0	3	KMT	0	0.02515396	0.58159246	1.719417064	»O¥_¥«¤¤¥¿°Ï¤ô·½¨½
»O¥_¥«¤¤¥¿°Ï¤ô·½¨½	³\¦¨«H	»O¥_¥«¤¤¥¿°Ï¤ô·½¨½³\¦¨«H	2	1	1956	µLÄÒÄy¤Î¥¼¸g¬FÄÒ±ÀÂË	0	0	169	0.1023	0	0	3	KMT	0	0.03561925	0.58159246	1.719417064	»O¥_¥«¤¤¥¿°Ï¤ô·½¨½
»O¥_¥«¤¤¥¿°Ï¤ô·½¨½	ªL¥þ¸q	»O¥_¥«¤¤¥¿°Ï¤ô·½¨½ªL¥þ¸q	3	1	1954	¤¤°ê°ê¥ÁÄÒ	1	0	1220	0.7389	1	1	3	KMT	0	0.58159246	0.58159246	1.719417064	»O¥_¥«¤¤¥¿°Ï¤ô·½¨½
»O¥_¥«¤¤¥¿°Ï´I¤ô¨½	³¯ÄR¯u	»O¥_¥«¤¤¥¿°Ï´I¤ô¨½³¯ÄR¯u	1	0	1952	¤¤°ê°ê¥ÁÄÒ	1	0	1378	1	1	1	1	KMT	0	1	1	1	»O¥_¥«¤¤¥¿°Ï´I¤ô¨½
»O¥_¥«¤¤¥¿°Ï¤å²±¨½	?²Ð§»	»O¥_¥«¤¤¥¿°Ï¤å²±¨½?²Ð§»	1	1	1944	µLÄÒÄy¤Î¥¼¸g¬FÄÒ±ÀÂË	0	0	1302	1	1	1	1	KMT	0	1	1	1	»O¥_¥«¤¤¥¿°Ï¤å²±¨½
»O¥_¥«¤¤¥¿°ÏªL¿³¨½	§d¼y¨K	»O¥_¥«¤¤¥¿°ÏªL¿³¨½§d¼y¨K	1	1	1968	¤¤°ê°ê¥ÁÄÒ	1	0	1796	0.701	1	1	2	KMT	0	0.491401	0.58074221	1.721934419	»O¥_¥«¤¤¥¿°ÏªL¿³¨½
»O¥_¥«¤¤¥¿°ÏªL¿³¨½	±iª÷§ö	»O¥_¥«¤¤¥¿°ÏªL¿³¨½±iª÷§ö	2	0	1956	µLÄÒÄy¤Î¥¼¸g¬FÄÒ±ÀÂË	0	0	766	0.2989	0	0	2	KMT	0	0.58074221	0.58074221	1.721934419	»O¥_¥«¤¤¥¿°ÏªL¿³¨½
»O¥_¥«¤¤¥¿°Ïªe³ö¨½	¹Q¤h®Ú	»O¥_¥«¤¤¥¿°Ïªe³ö¨½¹Q¤h®Ú	1	1	1946	¤¤°ê°ê¥ÁÄÒ	1	0	1578	0.6464	1	1	2	KMT	0	0.41783296	0.54279521	1.842315447	»O¥_¥«¤¤¥¿°Ïªe³ö¨½
»O¥_¥«¤¤¥¿°Ïªe³ö¨½	¾G®Ñ¼C	»O¥_¥«¤¤¥¿°Ïªe³ö¨½¾G®Ñ¼C	2	1	1957	µLÄÒÄy¤Î¥¼¸g¬FÄÒ±ÀÂË	0	0	863	0.3535	0	0	2	KMT	0	0.54279521	0.54279521	1.842315447	»O¥_¥«¤¤¥¿°Ïªe³ö¨½
»O¥_¥«¤¤¥¿°Ï³»ªF¨½	¨®¥¿°ê	»O¥_¥«¤¤¥¿°Ï³»ªF¨½¨®¥¿°ê	1	1	1953	µLÄÒÄy¤Î¥¼¸g¬FÄÒ±ÀÂË	0	0	1193	0.3622	0	0	2	KMT	0	0.13118884	0.53785013	1.85925399	»O¥_¥«¤¤¥¿°Ï³»ªF¨½
»O¥_¥«¤¤¥¿°Ï³»ªF¨½	¤ýÂ`¾ð	»O¥_¥«¤¤¥¿°Ï³»ªF¨½¤ýÂ`¾ð	2	1	1956	¤¤°ê°ê¥ÁÄÒ	1	0	2100	0.6377	1	1	2	KMT	0	0.53785013	0.53785013	1.85925399	»O¥_¥«¤¤¥¿°Ï³»ªF¨½
»O¥_¥«¤¤¥¿°Ïºô·Ë¨½	®L¸U®ö	»O¥_¥«¤¤¥¿°Ïºô·Ë¨½®L¸U®ö	1	1	1952	µLÄÒÄy¤Î¥¼¸g¬FÄÒ±ÀÂË	0	0	1713	0.5381	1	0	2	KMT	0	0.28955161	0.50281085	1.988819454	»O¥_¥«¤¤¥¿°Ïºô·Ë¨½
»O¥_¥«¤¤¥¿°Ïºô·Ë¨½	ªLÄ_²q	»O¥_¥«¤¤¥¿°Ïºô·Ë¨½ªLÄ_²q	2	0	1960	¤¤°ê°ê¥ÁÄÒ	1	0	1470	0.4618	0	1	2	KMT	0	0.50281085	0.50281085	1.988819454	»O¥_¥«¤¤¥¿°Ïºô·Ë¨½
»O¥_¥«¤¤¥¿°ÏªO·Ë¨½	·¨°ê©ú	»O¥_¥«¤¤¥¿°ÏªO·Ë¨½·¨°ê©ú	1	1	1956	µLÄÒÄy¤Î¥¼¸g¬FÄÒ±ÀÂË	0	0	446	0.2341	0	0	3	KMT	0	0.05480281	0.40969835	2.440820179	»O¥_¥«¤¤¥¿°ÏªO·Ë¨½
»O¥_¥«¤¤¥¿°ÏªO·Ë¨½	¶À°ê½÷	»O¥_¥«¤¤¥¿°ÏªO·Ë¨½¶À°ê½÷	2	1	1957	¤¤°ê°ê¥ÁÄÒ	1	0	1064	0.5585	1	1	3	KMT	0	0.36672506	0.40969835	2.440820179	»O¥_¥«¤¤¥¿°ÏªO·Ë¨½
»O¥_¥«¤¤¥¿°ÏªO·Ë¨½	ªL®¶¶©	»O¥_¥«¤¤¥¿°ÏªO·Ë¨½ªL®¶¶©	3	1	1951	¥Á¥D¶i¨BÄÒ	0	1	395	0.2073	0	0	3	KMT	0	0.40969835	0.40969835	2.440820179	»O¥_¥«¤¤¥¿°ÏªO·Ë¨½
»O¥_¥«¤¤¥¿°Ï¿Ã®E¨½	Â²¨q­^	»O¥_¥«¤¤¥¿°Ï¿Ã®E¨½Â²¨q­^	1	0	1963	µLÄÒÄy¤Î¥¼¸g¬FÄÒ±ÀÂË	0	0	1327	0.4086	0	1	2	KMT	0	0.16695396	0.51658965	1.935772426	»O¥_¥«¤¤¥¿°Ï¿Ã®E¨½
»O¥_¥«¤¤¥¿°Ï¿Ã®E¨½	³¯¤ìªQ	»O¥_¥«¤¤¥¿°Ï¿Ã®E¨½³¯¤ìªQ	2	1	1946	¤¤°ê°ê¥ÁÄÒ	1	0	1920	0.5913	1	0	2	KMT	0	0.51658965	0.51658965	1.935772426	»O¥_¥«¤¤¥¿°Ï¿Ã®E¨½
»O¥_¥«¤¤¥¿°Ï¿Ã³·¨½	°ªºÖ©ú	»O¥_¥«¤¤¥¿°Ï¿Ã³·¨½°ªºÖ©ú	1	1	1949	¤¤°ê°ê¥ÁÄÒ	1	0	1053	0.3957	0	1	2	KMT	0	0.15657849	0.52163613	1.917045125	»O¥_¥«¤¤¥¿°Ï¿Ã³·¨½
»O¥_¥«¤¤¥¿°Ï¿Ã³·¨½	³¯¤å½è	»O¥_¥«¤¤¥¿°Ï¿Ã³·¨½³¯¤å½è	2	1	1952	µLÄÒÄy¤Î¥¼¸g¬FÄÒ±ÀÂË	0	0	1608	0.6042	1	0	2	KMT	0	0.52163613	0.52163613	1.917045125	»O¥_¥«¤¤¥¿°Ï¿Ã³·¨½
»O¥_¥«¤¤¥¿°Ï¥Ã¥\¨½	³¯§»©ú	»O¥_¥«¤¤¥¿°Ï¥Ã¥\¨½³¯§»©ú	1	1	1953	¤¤°ê°ê¥ÁÄÒ	1	0	3006	1	1	1	1	KMT	0	1	1	1	»O¥_¥«¤¤¥¿°Ï¥Ã¥\¨½
»O¥_¥«¤¤¥¿°Ï¥Ã©÷¨½	¤ý¼y©v	»O¥_¥«¤¤¥¿°Ï¥Ã©÷¨½¤ý¼y©v	1	1	1948	µLÄÒÄy¤Î¥¼¸g¬FÄÒ±ÀÂË	0	0	1099	0.3709	0	0	2	KMT	0	0.13756681	0.53320781	1.875441397	»O¥_¥«¤¤¥¿°Ï¥Ã©÷¨½
»O¥_¥«¤¤¥¿°Ï¥Ã©÷¨½	³¯ª³¦p	»O¥_¥«¤¤¥¿°Ï¥Ã©÷¨½³¯ª³¦p	2	0	1944	¤¤°ê°ê¥ÁÄÒ	1	0	1864	0.629	1	1	2	KMT	0	0.53320781	0.53320781	1.875441397	»O¥_¥«¤¤¥¿°Ï¥Ã©÷¨½
»O¥_¥«¤¤¥¿°ÏÀs¿³¨½	ªL¥¿´¸	»O¥_¥«¤¤¥¿°ÏÀs¿³¨½ªL¥¿´¸	1	1	1969	µLÄÒÄy¤Î¥¼¸g¬FÄÒ±ÀÂË	0	0	1176	0.5681	1	0	2	KMT	0	0.32273761	0.50918885	1.96390789	»O¥_¥«¤¤¥¿°ÏÀs¿³¨½
»O¥_¥«¤¤¥¿°ÏÀs¿³¨½	§f³¯¥É¤k	»O¥_¥«¤¤¥¿°ÏÀs¿³¨½§f³¯¥É¤k	2	0	1951	¤¤°ê°ê¥ÁÄÒ	1	0	894	0.4318	0	1	2	KMT	0	0.50918885	0.50918885	1.96390789	»O¥_¥«¤¤¥¿°ÏÀs¿³¨½
»O¥_¥«¤¤¥¿°Ï©¾¶Ô¨½	¤è²ü¥Í	»O¥_¥«¤¤¥¿°Ï©¾¶Ô¨½¤è²ü¥Í	1	1	1959	¤¤°ê°ê¥ÁÄÒ	1	0	3039	1	1	1	1	KMT	0	1	1	1	»O¥_¥«¤¤¥¿°Ï©¾¶Ô¨½
»O¥_¥«¤¤¥¿°Ï·H¦w¨½	Ò\¥ú¦t	»O¥_¥«¤¤¥¿°Ï·H¦w¨½Ò\¥ú¦t	1	1	1959	¤¤°ê°ê¥ÁÄÒ	1	0	1879	1	1	1	1	KMT	0	1	1	1	»O¥_¥«¤¤¥¿°Ï·H¦w¨½
»O¥_¥«¤¤¥¿°Ï·R°ê¨½	¦¿Åã¬ü	»O¥_¥«¤¤¥¿°Ï·R°ê¨½¦¿Åã¬ü	1	0	1960	µLÄÒÄy¤Î¥¼¸g¬FÄÒ±ÀÂË	0	0	178	0.0972	0	0	3	KMT	0	0.00944784	0.45644633	2.190838077	»O¥_¥«¤¤¥¿°Ï·R°ê¨½
»O¥_¥«¤¤¥¿°Ï·R°ê¨½	¬x¬üµØ	»O¥_¥«¤¤¥¿°Ï·R°ê¨½¬x¬üµØ	2	0	1960	µLÄÒÄy¤Î¥¼¸g¬FÄÒ±ÀÂË	0	0	569	0.3107	0	0	3	KMT	0	0.10598233	0.45644633	2.190838077	»O¥_¥«¤¤¥¿°Ï·R°ê¨½
»O¥_¥«¤¤¥¿°Ï·R°ê¨½	©P¼w¼í	»O¥_¥«¤¤¥¿°Ï·R°ê¨½©P¼w¼í	3	1	1977	¤¤°ê°ê¥ÁÄÒ	1	0	1084	0.592	1	0	3	KMT	0	0.45644633	0.45644633	2.190838077	»O¥_¥«¤¤¥¿°Ï·R°ê¨½
»O¥_¥«¤¤¥¿°Ï«nªù¨½	³¢¦³½å	»O¥_¥«¤¤¥¿°Ï«nªù¨½³¢¦³½å	1	1	1953	¤¤°ê°ê¥ÁÄÒ	1	0	1257	1	1	1	1	KMT	0	1	1	1	»O¥_¥«¤¤¥¿°Ï«nªù¨½
»O¥_¥«¤¤¥¿°ÏÀs¥ú¨½	³¯¸UÀs	»O¥_¥«¤¤¥¿°ÏÀs¥ú¨½³¯¸UÀs	1	1	1953	¤¤°ê°ê¥ÁÄÒ	1	0	1498	1	1	1	1	KMT	0	1	1	1	»O¥_¥«¤¤¥¿°ÏÀs¥ú¨½
»O¥_¥«¤¤¥¿°Ï«nºÖ¨½	·¨«Hªv	»O¥_¥«¤¤¥¿°Ï«nºÖ¨½·¨«Hªv	1	1	1937	µLÄÒÄy¤Î¥¼¸g¬FÄÒ±ÀÂË	0	0	1589	0.3377	0	0	2	KMT	0	0.11404129	0.55255013	1.809790543	»O¥_¥«¤¤¥¿°Ï«nºÖ¨½
»O¥_¥«¤¤¥¿°Ï«nºÖ¨½	³\¯q©ú	»O¥_¥«¤¤¥¿°Ï«nºÖ¨½³\¯q©ú	2	1	1962	¤¤°ê°ê¥ÁÄÒ	1	0	3115	0.6622	1	1	2	KMT	0	0.55255013	0.55255013	1.809790543	»O¥_¥«¤¤¥¿°Ï«nºÖ¨½
»O¥_¥«¤¤¥¿°ÏÀsºÖ¨½	¾G¬Ã¬Ã	»O¥_¥«¤¤¥¿°ÏÀsºÖ¨½¾G¬Ã¬Ã	1	0	1951	µLÄÒÄy¤Î¥¼¸g¬FÄÒ±ÀÂË	0	0	1902	0.5949	1	1	2	KMT	0	0.35390601	0.51793101	1.930759079	»O¥_¥«¤¤¥¿°ÏÀsºÖ¨½
»O¥_¥«¤¤¥¿°ÏÀsºÖ¨½	Áé¨}¥­	»O¥_¥«¤¤¥¿°ÏÀsºÖ¨½Áé¨}¥­	2	1	1957	¤¤°ê°ê¥ÁÄÒ	1	0	1295	0.405	0	0	2	KMT	0	0.51793101	0.51793101	1.930759079	»O¥_¥«¤¤¥¿°ÏÀsºÖ¨½
»O¥_¥«¤¤¥¿°Ï·sÀç¨½	¤ý³¢¨qµ^	»O¥_¥«¤¤¥¿°Ï·sÀç¨½¤ý³¢¨qµ^	1	0	1947	¤¤°ê°ê¥ÁÄÒ	1	0	2367	0.5458	1	1	2	KMT	0	0.29789764	0.50410445	1.983715875	»O¥_¥«¤¤¥¿°Ï·sÀç¨½
»O¥_¥«¤¤¥¿°Ï·sÀç¨½	³¯¶¶§Q	»O¥_¥«¤¤¥¿°Ï·sÀç¨½³¯¶¶§Q	2	1	1948	µLÄÒÄy¤Î¥¼¸g¬FÄÒ±ÀÂË	0	0	1969	0.4541	0	0	2	KMT	0	0.50410445	0.50410445	1.983715875	»O¥_¥«¤¤¥¿°Ï·sÀç¨½
»O¥_¥«¤¤¥¿°Ï«Ø°ê¨½	³\®i¥¿	»O¥_¥«¤¤¥¿°Ï«Ø°ê¨½³\®i¥¿	1	1	1955	¤¤°ê°ê¥ÁÄÒ	1	0	496	0.7116	1	1	2	KMT	0	0.50637456	0.58949145	1.696377445	»O¥_¥«¤¤¥¿°Ï«Ø°ê¨½
»O¥_¥«¤¤¥¿°Ï«Ø°ê¨½	³¯ÄQ¤¤	»O¥_¥«¤¤¥¿°Ï«Ø°ê¨½³¯ÄQ¤¤	2	1	1968	µLÄÒÄy¤Î¥¼¸g¬FÄÒ±ÀÂË	0	0	201	0.2883	0	0	2	KMT	0	0.58949145	0.58949145	1.696377445	»O¥_¥«¤¤¥¿°Ï«Ø°ê¨½
»O¥_¥«¤¤¥¿°Ï¥ú´_¨½	³\¤åµØ	»O¥_¥«¤¤¥¿°Ï¥ú´_¨½³\¤åµØ	1	1	1947	¤¤°ê°ê¥ÁÄÒ	1	0	825	0.4314	1	0	3	KMT	0	0.18610596	0.36861221	2.712878122	»O¥_¥«¤¤¥¿°Ï¥ú´_¨½
»O¥_¥«¤¤¥¿°Ï¥ú´_¨½	½²¤å½÷	»O¥_¥«¤¤¥¿°Ï¥ú´_¨½½²¤å½÷	2	1	1948	¤¤°ê°ê¥ÁÄÒ	1	0	348	0.182	0	0	3	KMT	0	0.21922996	0.36861221	2.712878122	»O¥_¥«¤¤¥¿°Ï¥ú´_¨½
»O¥_¥«¤¤¥¿°Ï¥ú´_¨½	¤ýÄR¬ü	»O¥_¥«¤¤¥¿°Ï¥ú´_¨½¤ýÄR¬ü	3	0	1951	¤¤°ê°ê¥ÁÄÒ	1	0	739	0.3865	0	0	3	KMT	0	0.36861221	0.36861221	2.712878122	»O¥_¥«¤¤¥¿°Ï¥ú´_¨½
»O¥_¥«¤¤¥¿°Ï¾¤©ú¨½	¾G¿P©v	»O¥_¥«¤¤¥¿°Ï¾¤©ú¨½¾G¿P©v	1	1	1958	¤¤°ê°ê¥ÁÄÒ	1	0	858	0.5941	1	1	2	KMT	0	0.35295481	0.51762845	1.931887631	»O¥_¥«¤¤¥¿°Ï¾¤©ú¨½
»O¥_¥«¤¤¥¿°Ï¾¤©ú¨½	¸­¬°¥¿	»O¥_¥«¤¤¥¿°Ï¾¤©ú¨½¸­¬°¥¿	2	1	1976	µLÄÒÄy¤Î¥¼¸g¬FÄÒ±ÀÂË	0	0	586	0.4058	0	0	2	KMT	0	0.51762845	0.51762845	1.931887631	»O¥_¥«¤¤¥¿°Ï¾¤©ú¨½
»O¥_¥«¤¤¥¿°Ï±öªá¨½	ªL¤ß´ü	»O¥_¥«¤¤¥¿°Ï±öªá¨½ªL¤ß´ü	1	0	1955	µLÄÒÄy¤Î¥¼¸g¬FÄÒ±ÀÂË	0	0	346	0.1987	0	0	3	KMT	0	0.03948169	0.36345329	2.751385192	»O¥_¥«¤¤¥¿°Ï±öªá¨½
»O¥_¥«¤¤¥¿°Ï±öªá¨½	§d±X¤s	»O¥_¥«¤¤¥¿°Ï±öªá¨½§d±X¤s	2	1	1947	µLÄÒÄy¤Î¥¼¸g¬FÄÒ±ÀÂË	0	0	765	0.4394	1	0	3	KMT	0	0.23255405	0.36345329	2.751385192	»O¥_¥«¤¤¥¿°Ï±öªá¨½
»O¥_¥«¤¤¥¿°Ï±öªá¨½	ªL¥ÃÂ×	»O¥_¥«¤¤¥¿°Ï±öªá¨½ªL¥ÃÂ×	3	1	1953	¤¤°ê°ê¥ÁÄÒ	1	0	630	0.3618	0	1	3	KMT	0	0.36345329	0.36345329	2.751385192	»O¥_¥«¤¤¥¿°Ï±öªá¨½
»O¥_¥«¤¤¥¿°Ï©¯ºÖ¨½	Ä¬§»¤¯	»O¥_¥«¤¤¥¿°Ï©¯ºÖ¨½Ä¬§»¤¯	1	1	1940	¤¤°ê°ê¥ÁÄÒ	1	0	2090	1	1	1	1	KMT	0	1	1	1	»O¥_¥«¤¤¥¿°Ï©¯ºÖ¨½
»O¥_¥«¤¤¥¿°Ï©¯¥«¨½	ªLºÕ¦N	»O¥_¥«¤¤¥¿°Ï©¯¥«¨½ªLºÕ¦N	1	1	1951	¤¤°ê°ê¥ÁÄÒ	1	0	1976	1	1	1	1	KMT	0	1	1	1	»O¥_¥«¤¤¥¿°Ï©¯¥«¨½
»O¥_¥«¤¤¥¿°ÏªFªù¨½	¦¶ª÷¶Q	»O¥_¥«¤¤¥¿°ÏªFªù¨½¦¶ª÷¶Q	1	1	1961	µLÄÒÄy¤Î¥¼¸g¬FÄÒ±ÀÂË	0	0	576	0.2525	0	0	2	KMT	0	0.06375625	0.62236301	1.606779298	»O¥_¥«¤¤¥¿°ÏªFªù¨½
»O¥_¥«¤¤¥¿°ÏªFªù¨½	¼B¥üµY	»O¥_¥«¤¤¥¿°ÏªFªù¨½¼B¥üµY	2	1	1940	¤¤°ê°ê¥ÁÄÒ	1	0	1705	0.7474	1	1	2	KMT	0	0.62236301	0.62236301	1.606779298	»O¥_¥«¤¤¥¿°ÏªFªù¨½
»O¥_¥«¤¤¥¿°Ï¤å¥_¨½	³¯§E¨q­ë	»O¥_¥«¤¤¥¿°Ï¤å¥_¨½³¯§E¨q­ë	1	0	1952	¤¤°ê°ê¥ÁÄÒ	1	0	1134	0.4054	1	1	3	KMT	0	0.16434916	0.34298009	2.915621137	»O¥_¥«¤¤¥¿°Ï¤å¥_¨½
»O¥_¥«¤¤¥¿°Ï¤å¥_¨½	¬I­»»ö	»O¥_¥«¤¤¥¿°Ï¤å¥_¨½¬I­»»ö	2	0	1961	µLÄÒÄy¤Î¥¼¸g¬FÄÒ±ÀÂË	0	0	918	0.3282	0	0	3	KMT	0	0.2720644	0.34298009	2.915621137	»O¥_¥«¤¤¥¿°Ï¤å¥_¨½
»O¥_¥«¤¤¥¿°Ï¤å¥_¨½	³¢¨|¸Û	»O¥_¥«¤¤¥¿°Ï¤å¥_¨½³¢¨|¸Û	3	1	1968	µLÄÒÄy¤Î¥¼¸g¬FÄÒ±ÀÂË	0	0	745	0.2663	0	0	3	KMT	0	0.34298009	0.34298009	2.915621137	»O¥_¥«¤¤¥¿°Ï¤å¥_¨½
»O¥_¥«¤¤¥¿°Ï¤å²»¨½	¤ý¨|¿·	»O¥_¥«¤¤¥¿°Ï¤å²»¨½¤ý¨|¿·	1	0	1954	µLÄÒÄy¤Î¥¼¸g¬FÄÒ±ÀÂË	0	0	834	0.2135	0	0	4	KMT	0	0.04558225	0.32815524	3.047338205	»O¥_¥«¤¤¥¿°Ï¤å²»¨½
»O¥_¥«¤¤¥¿°Ï¤å²»¨½	ªL¬KºÖ	»O¥_¥«¤¤¥¿°Ï¤å²»¨½ªL¬KºÖ	2	1	1934	¤¤°ê°ê¥ÁÄÒ	1	0	1816	0.4649	1	1	4	KMT	0	0.26171426	0.32815524	3.047338205	»O¥_¥«¤¤¥¿°Ï¤å²»¨½
»O¥_¥«¤¤¥¿°Ï¤å²»¨½	ªL¾Ë¥ß	»O¥_¥«¤¤¥¿°Ï¤å²»¨½ªL¾Ë¥ß	3	1	1943	µLÄÒÄy¤Î¥¼¸g¬FÄÒ±ÀÂË	0	0	292	0.0747	0	0	4	KMT	0	0.26729435	0.32815524	3.047338205	»O¥_¥«¤¤¥¿°Ï¤å²»¨½
»O¥_¥«¤¤¥¿°Ï¤å²»¨½	±i¦wªF	»O¥_¥«¤¤¥¿°Ï¤å²»¨½±i¦wªF	4	1	1961	ºñÄÒ	0	0	964	0.2467	0	0	4	KMT	0	0.32815524	0.32815524	3.047338205	»O¥_¥«¤¤¥¿°Ï¤å²»¨½
»O¥_¥«¤¤¥¿°Ï¤T·R¨½	³¯¤¯§Ó	»O¥_¥«¤¤¥¿°Ï¤T·R¨½³¯¤¯§Ó	1	1	1963	µLÄÒÄy¤Î¥¼¸g¬FÄÒ±ÀÂË	0	0	2463	0.5738	1	0	2	KMT	0	0.32924644	0.51080765	1.957684071	»O¥_¥«¤¤¥¿°Ï¤T·R¨½
»O¥_¥«¤¤¥¿°Ï¤T·R¨½	³\¦N¶¯	»O¥_¥«¤¤¥¿°Ï¤T·R¨½³\¦N¶¯	2	1	1944	¤¤°ê°ê¥ÁÄÒ	1	0	1829	0.4261	0	1	2	KMT	0	0.51080765	0.51080765	1.957684071	»O¥_¥«¤¤¥¿°Ï¤T·R¨½
»O¥_¥«¸UµØ°ÏºÖ¬P¨½	§õ¶À¥É®Ú	»O¥_¥«¸UµØ°ÏºÖ¬P¨½§õ¶À¥É®Ú	1	0	1943	¤¤°ê°ê¥ÁÄÒ	1	0	1738	0.6011	1	1	2	KMT	0	0.36132121	0.52036265	1.921736697	»O¥_¥«¸UµØ°ÏºÖ¬P¨½
»O¥_¥«¸UµØ°ÏºÖ¬P¨½	®}±f±R	»O¥_¥«¸UµØ°ÏºÖ¬P¨½®}±f±R	2	1	1969	µLÄÒÄy¤Î¥¼¸g¬FÄÒ±ÀÂË	0	0	1153	0.3988	0	0	2	KMT	0	0.52036265	0.52036265	1.921736697	»O¥_¥«¸UµØ°ÏºÖ¬P¨½
»O¥_¥«¸UµØ°Ï¸U¹Ø¨½	§d¯q¤ô	»O¥_¥«¸UµØ°Ï¸U¹Ø¨½§d¯q¤ô	1	1	1935	¤¤°ê°ê¥ÁÄÒ	1	0	869	0.5194	1	1	3	KMT	0	0.26977636	0.39466961	2.533764888	»O¥_¥«¸UµØ°Ï¸U¹Ø¨½
»O¥_¥«¸UµØ°Ï¸U¹Ø¨½	¬I®ü´Å	»O¥_¥«¸UµØ°Ï¸U¹Ø¨½¬I®ü´Å	2	1	1944	µLÄÒÄy¤Î¥¼¸g¬FÄÒ±ÀÂË	0	0	517	0.309	0	0	3	KMT	0	0.36525736	0.39466961	2.533764888	»O¥_¥«¸UµØ°Ï¸U¹Ø¨½
»O¥_¥«¸UµØ°Ï¸U¹Ø¨½	¦¿¿«ªL	»O¥_¥«¸UµØ°Ï¸U¹Ø¨½¦¿¿«ªL	3	1	1978	µLÄÒÄy¤Î¥¼¸g¬FÄÒ±ÀÂË	0	0	287	0.1715	0	0	3	KMT	0	0.39466961	0.39466961	2.533764888	»O¥_¥«¸UµØ°Ï¸U¹Ø¨½
»O¥_¥«¸UµØ°Ï¦èªù¨½	³¯§ù¸Û	»O¥_¥«¸UµØ°Ï¦èªù¨½³¯§ù¸Û	1	1	1956	µLÄÒÄy¤Î¥¼¸g¬FÄÒ±ÀÂË	0	0	913	0.4677	0	0	2	KMT	0	0.21874329	0.50198013	1.992110724	»O¥_¥«¸UµØ°Ï¦èªù¨½
»O¥_¥«¸UµØ°Ï¦èªù¨½	¸­¤ìÅï	»O¥_¥«¸UµØ°Ï¦èªù¨½¸­¤ìÅï	2	1	1930	¤¤°ê°ê¥ÁÄÒ	1	0	1039	0.5322	1	1	2	KMT	0	0.50198013	0.50198013	1.992110724	»O¥_¥«¸UµØ°Ï¦èªù¨½
»O¥_¥«¸UµØ°Ï·s°_¨½	³¯©s±ù	»O¥_¥«¸UµØ°Ï·s°_¨½³¯©s±ù	1	0	1954	µLÄÒÄy¤Î¥¼¸g¬FÄÒ±ÀÂË	0	0	1736	0.4808	0	0	2	KMT	0	0.23116864	0.50063345	1.997469406	»O¥_¥«¸UµØ°Ï·s°_¨½
»O¥_¥«¸UµØ°Ï·s°_¨½	°ª²KºÖ	»O¥_¥«¸UµØ°Ï·s°_¨½°ª²KºÖ	2	1	1936	¤¤°ê°ê¥ÁÄÒ	1	0	1874	0.5191	1	1	2	KMT	0	0.50063345	0.50063345	1.997469406	»O¥_¥«¸UµØ°Ï·s°_¨½
»O¥_¥«¸UµØ°Ïµæ¶é¨½	§d¿ü¹Ø	»O¥_¥«¸UµØ°Ïµæ¶é¨½§d¿ü¹Ø	1	1	1934	µLÄÒÄy¤Î¥¼¸g¬FÄÒ±ÀÂË	0	0	1540	0.4497	1	1	4	KMT	0	0.20223009	0.31053454	3.220253695	»O¥_¥«¸UµØ°Ïµæ¶é¨½
»O¥_¥«¸UµØ°Ïµæ¶é¨½	³¯§õ´DµØ	»O¥_¥«¸UµØ°Ïµæ¶é¨½³¯§õ´DµØ	2	0	1954	¤¤°ê°ê¥ÁÄÒ	1	0	781	0.228	0	0	4	KMT	0	0.25421409	0.31053454	3.220253695	»O¥_¥«¸UµØ°Ïµæ¶é¨½
»O¥_¥«¸UµØ°Ïµæ¶é¨½	¬ö¬R¥þ	»O¥_¥«¸UµØ°Ïµæ¶é¨½¬ö¬R¥þ	3	1	1979	µLÄÒÄy¤Î¥¼¸g¬FÄÒ±ÀÂË	0	0	713	0.2082	0	0	4	KMT	0	0.29756133	0.31053454	3.220253695	»O¥_¥«¸UµØ°Ïµæ¶é¨½
»O¥_¥«¸UµØ°Ïµæ¶é¨½	©P¥@¶¯	»O¥_¥«¸UµØ°Ïµæ¶é¨½©P¥@¶¯	4	1	1974	µLÄÒÄy¤Î¥¼¸g¬FÄÒ±ÀÂË	0	0	390	0.1139	0	0	4	KMT	0	0.31053454	0.31053454	3.220253695	»O¥_¥«¸UµØ°Ïµæ¶é¨½
»O¥_¥«¸UµØ°Ï«C¤s¨½	¬I©^¥ý	»O¥_¥«¸UµØ°Ï«C¤s¨½¬I©^¥ý	1	1	1958	µLÄÒÄy¤Î¥¼¸g¬FÄÒ±ÀÂË	0	0	477	0.148	0	0	3	KMT	0	0.021904	0.6075305	1.646007896	»O¥_¥«¸UµØ°Ï«C¤s¨½
»O¥_¥«¸UµØ°Ï«C¤s¨½	§õ¬L¦¨	»O¥_¥«¸UµØ°Ï«C¤s¨½§õ¬L¦¨	2	1	1956	¥Á¥D¶i¨BÄÒ	0	1	2448	0.7597	1	1	3	KMT	0	0.59904809	0.6075305	1.646007896	»O¥_¥«¸UµØ°Ï«C¤s¨½
»O¥_¥«¸UµØ°Ï«C¤s¨½	ÁÂ°ª¥É¸­	»O¥_¥«¸UµØ°Ï«C¤s¨½ÁÂ°ª¥É¸­	3	0	1930	µLÄÒÄy¤Î¥¼¸g¬FÄÒ±ÀÂË	0	0	297	0.0921	0	0	3	KMT	0	0.6075305	0.6075305	1.646007896	»O¥_¥«¸UµØ°Ï«C¤s¨½
»O¥_¥«¸UµØ°Ï´I¥Á¨½	­S²K¦¨	»O¥_¥«¸UµØ°Ï´I¥Á¨½­S²K¦¨	1	1	1948	¥Á¥D¶i¨BÄÒ	0	1	1859	0.6097	1	1	2	KMT	0	0.37173409	0.52399013	1.908432894	»O¥_¥«¸UµØ°Ï´I¥Á¨½
»O¥_¥«¸UµØ°Ï´I¥Á¨½	Àd©ú¼w	»O¥_¥«¸UµØ°Ï´I¥Á¨½Àd©ú¼w	2	1	1955	¤¤°ê°ê¥ÁÄÒ	1	0	1190	0.3902	0	0	2	KMT	0	0.52399013	0.52399013	1.908432894	»O¥_¥«¸UµØ°Ï´I¥Á¨½
»O¥_¥«¸UµØ°ÏºÖ­µ¨½	¤ý¤å¶î	»O¥_¥«¸UµØ°ÏºÖ­µ¨½¤ý¤å¶î	1	1	1936	¤¤°ê°ê¥ÁÄÒ	1	0	1655	1	1	1	1	KMT	0	1	1	1	»O¥_¥«¸UµØ°ÏºÖ­µ¨½
»O¥_¥«¸UµØ°Ï¤¯¼w¨½	³\²Q´f	»O¥_¥«¸UµØ°Ï¤¯¼w¨½³\²Q´f	1	0	1969	¥Á¥D¶i¨BÄÒ	0	1	1689	0.6737	1	1	3	KMT	0	0.45387169	0.51158741	1.954700175	»O¥_¥«¸UµØ°Ï¤¯¼w¨½
»O¥_¥«¸UµØ°Ï¤¯¼w¨½	¬_²EÄ£	»O¥_¥«¸UµØ°Ï¤¯¼w¨½¬_²EÄ£	2	1	1962	¤¤°ê°ê¥ÁÄÒ	1	0	528	0.2106	0	0	3	KMT	0	0.49822405	0.51158741	1.954700175	»O¥_¥«¸UµØ°Ï¤¯¼w¨½
»O¥_¥«¸UµØ°Ï¤¯¼w¨½	©P¬¯²M	»O¥_¥«¸UµØ°Ï¤¯¼w¨½©P¬¯²M	3	1	1950	µLÄÒÄy¤Î¥¼¸g¬FÄÒ±ÀÂË	0	0	290	0.1156	0	0	3	KMT	0	0.51158741	0.51158741	1.954700175	»O¥_¥«¸UµØ°Ï¤¯¼w¨½
»O¥_¥«¸UµØ°Ï´IºÖ¨½	³\¤å½÷	»O¥_¥«¸UµØ°Ï´IºÖ¨½³\¤å½÷	1	1	1947	¤¤°ê°ê¥ÁÄÒ	1	0	1366	0.4942	1	1	3	KMT	0	0.24423364	0.37238549	2.685389272	»O¥_¥«¸UµØ°Ï´IºÖ¨½
»O¥_¥«¸UµØ°Ï´IºÖ¨½	±i­«¶©	»O¥_¥«¸UµØ°Ï´IºÖ¨½±i­«¶©	2	1	1942	µLÄÒÄy¤Î¥¼¸g¬FÄÒ±ÀÂË	0	0	666	0.2409	0	0	3	KMT	0	0.30226645	0.37238549	2.685389272	»O¥_¥«¸UµØ°Ï´IºÖ¨½
»O¥_¥«¸UµØ°Ï´IºÖ¨½	·¨°V¹Å	»O¥_¥«¸UµØ°Ï´IºÖ¨½·¨°V¹Å	3	1	1979	µLÄÒÄy¤Î¥¼¸g¬FÄÒ±ÀÂË	0	0	732	0.2648	0	0	3	KMT	0	0.37238549	0.37238549	2.685389272	»O¥_¥«¸UµØ°Ï´IºÖ¨½
»O¥_¥«¸UµØ°Ï¬h¶m¨½	§õ­Z¶¯	»O¥_¥«¸UµØ°Ï¬h¶m¨½§õ­Z¶¯	1	1	1940	¤¤°ê°ê¥ÁÄÒ	1	0	1340	0.4182	0	1	3	KMT	0	0.17489124	0.44340293	2.255285052	»O¥_¥«¸UµØ°Ï¬h¶m¨½
»O¥_¥«¸UµØ°Ï¬h¶m¨½	½²©M¯q	»O¥_¥«¸UµØ°Ï¬h¶m¨½½²©M¯q	2	1	1974	µLÄÒÄy¤Î¥¼¸g¬FÄÒ±ÀÂË	0	0	1646	0.5137	1	0	3	KMT	0	0.43877893	0.44340293	2.255285052	»O¥_¥«¸UµØ°Ï¬h¶m¨½
»O¥_¥«¸UµØ°Ï¬h¶m¨½	©P¼üº½	»O¥_¥«¸UµØ°Ï¬h¶m¨½©P¼üº½	3	0	1958	µLÄÒÄy¤Î¥¼¸g¬FÄÒ±ÀÂË	0	0	218	0.068	0	0	3	KMT	0	0.44340293	0.44340293	2.255285052	»O¥_¥«¸UµØ°Ï¬h¶m¨½
»O¥_¥«¸UµØ°ÏµØ¦¿¨½	·¨µØ¤¤	»O¥_¥«¸UµØ°ÏµØ¦¿¨½·¨µØ¤¤	1	1	1955	¤¤°ê°ê¥ÁÄÒ	1	0	2859	0.5973	1	1	2	KMT	0	0.35676729	0.51885405	1.927324264	»O¥_¥«¸UµØ°ÏµØ¦¿¨½
»O¥_¥«¸UµØ°ÏµØ¦¿¨½	¸­½n	»O¥_¥«¸UµØ°ÏµØ¦¿¨½¸­½n	2	1	1961	¥Á¥D¶i¨BÄÒ	0	1	1927	0.4026	0	0	2	KMT	0	0.51885405	0.51885405	1.927324264	»O¥_¥«¸UµØ°ÏµØ¦¿¨½
»O¥_¥«¸UµØ°Ï¿}?¨½	§õ¥­¶¶	»O¥_¥«¸UµØ°Ï¿}?¨½§õ¥­¶¶	1	1	1941	µLÄÒÄy¤Î¥¼¸g¬FÄÒ±ÀÂË	0	0	2579	1	1	1	1	KMT	0	1	1	1	»O¥_¥«¸UµØ°Ï¿}?¨½
»O¥_¥«¸UµØ°Ïºñ³ö¨½	ªô­§´f	»O¥_¥«¸UµØ°Ïºñ³ö¨½ªô­§´f	1	0	1967	µLÄÒÄy¤Î¥¼¸g¬FÄÒ±ÀÂË	0	0	1727	0.6725	1	0	2	KMT	0	0.45225625	0.55944701	1.78747939	»O¥_¥«¸UµØ°Ïºñ³ö¨½
»O¥_¥«¸UµØ°Ïºñ³ö¨½	ªL«H°ê	»O¥_¥«¸UµØ°Ïºñ³ö¨½ªL«H°ê	2	1	1948	¥Á¥D¶i¨BÄÒ	0	1	841	0.3274	0	0	2	KMT	0	0.55944701	0.55944701	1.78747939	»O¥_¥«¸UµØ°Ïºñ³ö¨½
»O¥_¥«¸UµØ°Ï³»ºÓ¨½	§õ´¼Áo	»O¥_¥«¸UµØ°Ï³»ºÓ¨½§õ´¼Áo	1	1	1955	µLÄÒÄy¤Î¥¼¸g¬FÄÒ±ÀÂË	0	0	2566	0.55	1	1	2	KMT	0	0.3025	0.50491001	1.98055095	»O¥_¥«¸UµØ°Ï³»ºÓ¨½
»O¥_¥«¸UµØ°Ï³»ºÓ¨½	ªò¯Â®X	»O¥_¥«¸UµØ°Ï³»ºÓ¨½ªò¯Â®X	2	0	1962	¥Á¥D¶i¨BÄÒ	0	1	2099	0.4499	0	0	2	KMT	0	0.50491001	0.50491001	1.98055095	»O¥_¥«¸UµØ°Ï³»ºÓ¨½
»O¥_¥«¸UµØ°ÏÂù¶é¨½	³\´f«°	»O¥_¥«¸UµØ°ÏÂù¶é¨½³\´f«°	1	1	1957	µLÄÒÄy¤Î¥¼¸g¬FÄÒ±ÀÂË	0	0	2375	1	1	1	1	KMT	0	1	1	1	»O¥_¥«¸UµØ°ÏÂù¶é¨½
»O¥_¥«¸UµØ°Ï©M¥­¨½	§õ±l°ò	»O¥_¥«¸UµØ°Ï©M¥­¨½§õ±l°ò	1	1	1965	¥Á¥D¶i¨BÄÒ	0	1	2628	0.6138	1	1	2	KMT	0	0.37675044	0.52582365	1.901778286	»O¥_¥«¸UµØ°Ï©M¥­¨½
»O¥_¥«¸UµØ°Ï©M¥­¨½	ªL¤åÁo	»O¥_¥«¸UµØ°Ï©M¥­¨½ªL¤åÁo	2	1	1956	µLÄÒÄy¤Î¥¼¸g¬FÄÒ±ÀÂË	0	0	1653	0.3861	0	0	2	KMT	0	0.52582365	0.52582365	1.901778286	»O¥_¥«¸UµØ°Ï©M¥­¨½
»O¥_¥«¸UµØ°Ï©M¼w¨½	¬x¤Ñ¤Æ	»O¥_¥«¸UµØ°Ï©M¼w¨½¬x¤Ñ¤Æ	1	1	1953	µLÄÒÄy¤Î¥¼¸g¬FÄÒ±ÀÂË	0	0	1911	0.4766	1	1	3	KMT	0	0.22714756	0.3698271	2.703966259	»O¥_¥«¸UµØ°Ï©M¼w¨½
»O¥_¥«¸UµØ°Ï©M¼w¨½	³¯¬è·ç	»O¥_¥«¸UµØ°Ï©M¼w¨½³¯¬è·ç	2	1	1960	¥Á¥D¶i¨BÄÒ	0	1	1265	0.3155	0	0	3	KMT	0	0.32668781	0.3698271	2.703966259	»O¥_¥«¸UµØ°Ï©M¼w¨½
»O¥_¥«¸UµØ°Ï©M¼w¨½	§õ«Ø¤¤	»O¥_¥«¸UµØ°Ï©M¼w¨½§õ«Ø¤¤	3	1	1959	µLÄÒÄy¤Î¥¼¸g¬FÄÒ±ÀÂË	0	0	833	0.2077	0	0	3	KMT	0	0.3698271	0.3698271	2.703966259	»O¥_¥«¸UµØ°Ï©M¼w¨½
»O¥_¥«¸UµØ°Ï¥þ¼w¨½	¤ý¥­¤T	»O¥_¥«¸UµØ°Ï¥þ¼w¨½¤ý¥­¤T	1	1	1945	µLÄÒÄy¤Î¥¼¸g¬FÄÒ±ÀÂË	0	0	1507	0.6146	1	0	2	KMT	0	0.37773316	0.52618925	1.900456917	»O¥_¥«¸UµØ°Ï¥þ¼w¨½
»O¥_¥«¸UµØ°Ï¥þ¼w¨½	Ä¬¸U¿³	»O¥_¥«¸UµØ°Ï¥þ¼w¨½Ä¬¸U¿³	2	1	1929	¤¤°ê°ê¥ÁÄÒ	1	0	945	0.3853	0	1	2	KMT	0	0.52618925	0.52618925	1.900456917	»O¥_¥«¸UµØ°Ï¥þ¼w¨½
»O¥_¥«¸UµØ°Ï¤éµ½¨½	°ª¨q­ë	»O¥_¥«¸UµØ°Ï¤éµ½¨½°ª¨q­ë	1	0	1959	µLÄÒÄy¤Î¥¼¸g¬FÄÒ±ÀÂË	0	0	923	0.414	0	0	3	KMT	0	0.171396	0.38979482	2.565452255	»O¥_¥«¸UµØ°Ï¤éµ½¨½
»O¥_¥«¸UµØ°Ï¤éµ½¨½	¿½¶i¼w	»O¥_¥«¸UµØ°Ï¤éµ½¨½¿½¶i¼w	2	1	1957	µLÄÒÄy¤Î¥¼¸g¬FÄÒ±ÀÂË	0	0	994	0.4459	1	0	3	KMT	0	0.37022281	0.38979482	2.565452255	»O¥_¥«¸UµØ°Ï¤éµ½¨½
»O¥_¥«¸UµØ°Ï¤éµ½¨½	§õ¥üªN	»O¥_¥«¸UµØ°Ï¤éµ½¨½§õ¥üªN	3	1	1953	µLÄÒÄy¤Î¥¼¸g¬FÄÒ±ÀÂË	0	0	312	0.1399	0	0	3	KMT	0	0.38979482	0.38979482	2.565452255	»O¥_¥«¸UµØ°Ï¤éµ½¨½
»O¥_¥«¸UµØ°Ï¹Ø¼w¨½	³¯´Â¶§	»O¥_¥«¸UµØ°Ï¹Ø¼w¨½³¯´Â¶§	1	1	1938	¥Á¥D¶i¨BÄÒ	0	1	1447	0.4742	0	1	2	KMT	0	0.22486564	0.50122613	1.995107478	»O¥_¥«¸UµØ°Ï¹Ø¼w¨½
»O¥_¥«¸UµØ°Ï¹Ø¼w¨½	½²¯ÀÄR	»O¥_¥«¸UµØ°Ï¹Ø¼w¨½½²¯ÀÄR	2	0	1949	¤¤°ê°ê¥ÁÄÒ	1	0	1604	0.5257	1	0	2	KMT	0	0.50122613	0.50122613	1.995107478	»O¥_¥«¸UµØ°Ï¹Ø¼w¨½
»O¥_¥«¸UµØ°Ï©¾¼w¨½	¾G©ú¸Î	»O¥_¥«¸UµØ°Ï©¾¼w¨½¾G©ú¸Î	1	1	1954	¥Á¥D¶i¨BÄÒ	0	1	1709	0.6398	1	1	2	KMT	0	0.40934404	0.53901605	1.855232326	»O¥_¥«¸UµØ°Ï©¾¼w¨½
»O¥_¥«¸UµØ°Ï©¾¼w¨½	§d®Û²M	»O¥_¥«¸UµØ°Ï©¾¼w¨½§d®Û²M	2	1	1956	µLÄÒÄy¤Î¥¼¸g¬FÄÒ±ÀÂË	0	0	962	0.3601	0	0	2	KMT	0	0.53901605	0.53901605	1.855232326	»O¥_¥«¸UµØ°Ï©¾¼w¨½
»O¥_¥«¸UµØ°ÏÀA¼w¨½	¤B¼Sªê	»O¥_¥«¸UµØ°ÏÀA¼w¨½¤B¼Sªê	1	1	1941	¤¤°ê°ê¥ÁÄÒ	1	0	1568	0.4892	0	1	2	KMT	0	0.23931664	0.50013113	1.999475618	»O¥_¥«¸UµØ°ÏÀA¼w¨½
»O¥_¥«¸UµØ°ÏÀA¼w¨½	¬x¨qªK	»O¥_¥«¸UµØ°ÏÀA¼w¨½¬x¨qªK	2	0	1949	µLÄÒÄy¤Î¥¼¸g¬FÄÒ±ÀÂË	0	0	1637	0.5107	1	0	2	KMT	0	0.50013113	0.50013113	1.999475618	»O¥_¥«¸UµØ°ÏÀA¼w¨½
»O¥_¥«¸UµØ°Ï»Ê¼w¨½	·¨¦~µo	»O¥_¥«¸UµØ°Ï»Ê¼w¨½·¨¦~µo	1	1	1942	µLÄÒÄy¤Î¥¼¸g¬FÄÒ±ÀÂË	0	0	2384	1	1	1	1	KMT	0	1	1	1	»O¥_¥«¸UµØ°Ï»Ê¼w¨½
»O¥_¥«¸UµØ°Ï§µ¼w¨½	´å³ó°ó	»O¥_¥«¸UµØ°Ï§µ¼w¨½´å³ó°ó	1	1	1960	µLÄÒÄy¤Î¥¼¸g¬FÄÒ±ÀÂË	0	0	1156	0.5728	1	1	2	KMT	0	0.32809984	0.51051425	1.958809181	»O¥_¥«¸UµØ°Ï§µ¼w¨½
»O¥_¥«¸UµØ°Ï§µ¼w¨½	¤ý¨qµ^	»O¥_¥«¸UµØ°Ï§µ¼w¨½¤ý¨qµ^	2	0	1945	µLÄÒÄy¤Î¥¼¸g¬FÄÒ±ÀÂË	0	0	862	0.4271	0	0	2	KMT	0	0.51051425	0.51051425	1.958809181	»O¥_¥«¸UµØ°Ï§µ¼w¨½
»O¥_¥«¸UµØ°Ï«O¼w¨½	·¨¬ü¤k	»O¥_¥«¸UµØ°Ï«O¼w¨½·¨¬ü¤k	1	0	1955	µLÄÒÄy¤Î¥¼¸g¬FÄÒ±ÀÂË	0	0	1641	1	1	1	1	KMT	0	1	1	1	»O¥_¥«¸UµØ°Ï«O¼w¨½
»O¥_¥«¸UµØ°Ïºa¼w¨½	³¯©¾«i	»O¥_¥«¸UµØ°Ïºa¼w¨½³¯©¾«i	1	1	1940	µLÄÒÄy¤Î¥¼¸g¬FÄÒ±ÀÂË	0	0	988	0.4139	0	0	2	KMT	0	0.17131321	0.51470921	1.942844582	»O¥_¥«¸UµØ°Ïºa¼w¨½
»O¥_¥«¸UµØ°Ïºa¼w¨½	³¯ªYº~	»O¥_¥«¸UµØ°Ïºa¼w¨½³¯ªYº~	2	1	1958	µLÄÒÄy¤Î¥¼¸g¬FÄÒ±ÀÂË	0	0	1399	0.586	1	1	2	KMT	0	0.51470921	0.51470921	1.942844582	»O¥_¥«¸UµØ°Ïºa¼w¨½
»O¥_¥«¸UµØ°ÏµØ¤¤¨½	ªL°]µo	»O¥_¥«¸UµØ°ÏµØ¤¤¨½ªL°]µo	1	1	1947	µLÄÒÄy¤Î¥¼¸g¬FÄÒ±ÀÂË	0	0	1767	0.4855	0	1	2	KMT	0	0.23571025	0.50031761	1.998730366	»O¥_¥«¸UµØ°ÏµØ¤¤¨½
»O¥_¥«¸UµØ°ÏµØ¤¤¨½	¶À¼w­n	»O¥_¥«¸UµØ°ÏµØ¤¤¨½¶À¼w­n	2	1	1949	µLÄÒÄy¤Î¥¼¸g¬FÄÒ±ÀÂË	0	0	1872	0.5144	1	0	2	KMT	0	0.50031761	0.50031761	1.998730366	»O¥_¥«¸UµØ°ÏµØ¤¤¨½
»O¥_¥«¸UµØ°Ï¿³¼w¨½	¶À¶iºÖ	»O¥_¥«¸UµØ°Ï¿³¼w¨½¶À¶iºÖ	1	1	1951	µLÄÒÄy¤Î¥¼¸g¬FÄÒ±ÀÂË	0	0	1439	0.5308	1	1	2	KMT	0	0.28174864	0.50180345	1.992812126	»O¥_¥«¸UµØ°Ï¿³¼w¨½
»O¥_¥«¸UµØ°Ï¿³¼w¨½	ªL®õ§U	»O¥_¥«¸UµØ°Ï¿³¼w¨½ªL®õ§U	2	1	1938	µLÄÒÄy¤Î¥¼¸g¬FÄÒ±ÀÂË	0	0	1272	0.4691	0	0	2	KMT	0	0.50180345	0.50180345	1.992812126	»O¥_¥«¸UµØ°Ï¿³¼w¨½
»O¥_¥«¸UµØ°Ï¤é²»¨½	¦¶°_»R	»O¥_¥«¸UµØ°Ï¤é²»¨½¦¶°_»R	1	1	1947	µLÄÒÄy¤Î¥¼¸g¬FÄÒ±ÀÂË	0	0	101	0.03	0	0	3	KMT	0	0.0009	0.48328101	2.069189518	»O¥_¥«¸UµØ°Ï¤é²»¨½
»O¥_¥«¸UµØ°Ï¤é²»¨½	ÁéÂ@	»O¥_¥«¸UµØ°Ï¤é²»¨½ÁéÂ@	2	1	1951	¤¤°ê°ê¥ÁÄÒ	1	0	1893	0.5625	1	1	3	KMT	0	0.31730625	0.48328101	2.069189518	»O¥_¥«¸UµØ°Ï¤é²»¨½
»O¥_¥«¸UµØ°Ï¤é²»¨½	°ª¸­¤ë´f	»O¥_¥«¸UµØ°Ï¤é²»¨½°ª¸­¤ë´f	3	0	1951	µLÄÒÄy¤Î¥¼¸g¬FÄÒ±ÀÂË	0	0	1371	0.4074	0	0	3	KMT	0	0.48328101	0.48328101	2.069189518	»O¥_¥«¸UµØ°Ï¤é²»¨½
»O¥_¥«¸UµØ°Ï©¾­s¨½	ªL¿ü?	»O¥_¥«¸UµØ°Ï©¾­s¨½ªL¿ü?	1	1	1960	¤¤°ê°ê¥ÁÄÒ	1	0	2115	0.7038	1	1	2	KMT	0	0.49533444	0.58300965	1.715237475	»O¥_¥«¸UµØ°Ï©¾­s¨½
»O¥_¥«¸UµØ°Ï©¾­s¨½	¬x´É¶©	»O¥_¥«¸UµØ°Ï©¾­s¨½¬x´É¶©	2	1	1949	µLÄÒÄy¤Î¥¼¸g¬FÄÒ±ÀÂË	0	0	890	0.2961	0	0	2	KMT	0	0.58300965	0.58300965	1.715237475	»O¥_¥«¸UµØ°Ï©¾­s¨½
»O¥_¥«¸UµØ°Ï·s©¾¨½	ªô¤åÀs	»O¥_¥«¸UµØ°Ï·s©¾¨½ªô¤åÀs	1	1	1956	¤¤°ê°ê¥ÁÄÒ	1	0	1670	1	1	1	1	KMT	0	1	1	1	»O¥_¥«¸UµØ°Ï·s©¾¨½
»O¥_¥«¸UµØ°Ï·s©M¨½	³¢³Ç¤H	»O¥_¥«¸UµØ°Ï·s©M¨½³¢³Ç¤H	1	1	1953	µLÄÒÄy¤Î¥¼¸g¬FÄÒ±ÀÂË	0	0	1193	0.2548	0	0	3	KMT	0	0.06492304	0.38453105	2.600570227	»O¥_¥«¸UµØ°Ï·s©M¨½
»O¥_¥«¸UµØ°Ï·s©M¨½	±iÂEªN	»O¥_¥«¸UµØ°Ï·s©M¨½±iÂEªN	2	1	1958	¤¤°ê°ê¥ÁÄÒ	1	0	2423	0.5175	1	1	3	KMT	0	0.33272929	0.38453105	2.600570227	»O¥_¥«¸UµØ°Ï·s©M¨½
»O¥_¥«¸UµØ°Ï·s©M¨½	?´IµØ	»O¥_¥«¸UµØ°Ï·s©M¨½?´IµØ	3	1	1952	µLÄÒÄy¤Î¥¼¸g¬FÄÒ±ÀÂË	0	0	1066	0.2276	0	0	3	KMT	0	0.38453105	0.38453105	2.600570227	»O¥_¥«¸UµØ°Ï·s©M¨½
»O¥_¥«¸UµØ°Ï·s¦w¨½	¶À¿P­ë	»O¥_¥«¸UµØ°Ï·s¦w¨½¶À¿P­ë	1	0	1966	µLÄÒÄy¤Î¥¼¸g¬FÄÒ±ÀÂË	0	0	1094	0.3011	0	0	3	KMT	0	0.09066121	0.50781155	1.969234453	»O¥_¥«¸UµØ°Ï·s¦w¨½
»O¥_¥«¸UµØ°Ï·s¦w¨½	³¢¥¿¤¤	»O¥_¥«¸UµØ°Ï·s¦w¨½³¢¥¿¤¤	2	1	1960	¤¤°ê°ê¥ÁÄÒ	1	0	2338	0.6435	1	1	3	KMT	0	0.50475346	0.50781155	1.969234453	»O¥_¥«¸UµØ°Ï·s¦w¨½
»O¥_¥«¸UµØ°Ï·s¦w¨½	½²³ÍµØ	»O¥_¥«¸UµØ°Ï·s¦w¨½½²³ÍµØ	3	1	1957	µLÄÒÄy¤Î¥¼¸g¬FÄÒ±ÀÂË	0	0	201	0.0553	0	0	3	KMT	0	0.50781155	0.50781155	1.969234453	»O¥_¥«¸UµØ°Ï·s¦w¨½
»O¥_¥«¸UµØ°Ï­â¾]¨½	´å¬î½¬	»O¥_¥«¸UµØ°Ï­â¾]¨½´å¬î½¬	1	0	1956	¤¤°ê°ê¥ÁÄÒ	1	0	1354	0.5786	1	0	3	KMT	0	0.33477796	0.4312702	2.318731969	»O¥_¥«¸UµØ°Ï­â¾]¨½
»O¥_¥«¸UµØ°Ï­â¾]¨½	§õÂE¸Î	»O¥_¥«¸UµØ°Ï­â¾]¨½§õÂE¸Î	2	1	1955	µLÄÒÄy¤Î¥¼¸g¬FÄÒ±ÀÂË	0	0	639	0.273	0	0	3	KMT	0	0.40930696	0.4312702	2.318731969	»O¥_¥«¸UµØ°Ï­â¾]¨½
»O¥_¥«¸UµØ°Ï­â¾]¨½	¶¾ª÷°ó	»O¥_¥«¸UµØ°Ï­â¾]¨½¶¾ª÷°ó	3	1	1960	µLÄÒÄy¤Î¥¼¸g¬FÄÒ±ÀÂË	0	0	347	0.1482	0	0	3	KMT	0	0.4312702	0.4312702	2.318731969	»O¥_¥«¸UµØ°Ï­â¾]¨½
»O¥_¥«¸UµØ°ÏÄË¶³¨½	ªL°ê±]	»O¥_¥«¸UµØ°ÏÄË¶³¨½ªL°ê±]	1	1	1958	µLÄÒÄy¤Î¥¼¸g¬FÄÒ±ÀÂË	0	0	532	0.2837	0	0	2	KMT	0	0.08048569	0.59342813	1.685124027	»O¥_¥«¸UµØ°ÏÄË¶³¨½
»O¥_¥«¸UµØ°ÏÄË¶³¨½	§õ­«µØ	»O¥_¥«¸UµØ°ÏÄË¶³¨½§õ­«µØ	2	1	1961	¤¤°ê°ê¥ÁÄÒ	1	0	1343	0.7162	1	1	2	KMT	0	0.59342813	0.59342813	1.685124027	»O¥_¥«¸UµØ°ÏÄË¶³¨½
»O¥_¥«¤j¦w°Ï¼w¦w¨½	¦ó¦è´N	»O¥_¥«¤j¦w°Ï¼w¦w¨½¦ó¦è´N	1	1	1936	¤¤°ê°ê¥ÁÄÒ	1	0	2444	1	1	1	1	KMT	0	1	1	1	»O¥_¥«¤j¦w°Ï¼w¦w¨½
»O¥_¥«¤j¦w°Ï¤¯·O¨½	ªL¤h¶Q	»O¥_¥«¤j¦w°Ï¤¯·O¨½ªL¤h¶Q	1	1	1956	¤¤°ê°ê¥ÁÄÒ	1	0	2313	1	1	1	1	KMT	0	1	1	1	»O¥_¥«¤j¦w°Ï¤¯·O¨½
»O¥_¥«¤j¦w°Ï©M¦w¨½	±i¥¿¶¯	»O¥_¥«¤j¦w°Ï©M¦w¨½±i¥¿¶¯	1	1	1942	¤¤°ê°ê¥ÁÄÒ	1	0	3015	1	1	1	1	KMT	0	1	1	1	»O¥_¥«¤j¦w°Ï©M¦w¨½
»O¥_¥«¤j¦w°Ï¥Á¬·¨½	³¯¶Ô¥\	»O¥_¥«¤j¦w°Ï¥Á¬·¨½³¯¶Ô¥\	1	1	1957	µLÄÒÄy¤Î¥¼¸g¬FÄÒ±ÀÂË	0	0	1443	0.3435	0	0	3	KMT	0	0.11799225	0.33724211	2.965228749	»O¥_¥«¤j¦w°Ï¥Á¬·¨½
»O¥_¥«¤j¦w°Ï¥Á¬·¨½	±i¶©«Û	»O¥_¥«¤j¦w°Ï¥Á¬·¨½±i¶©«Û	2	1	1951	¤¤°ê°ê¥ÁÄÒ	1	0	1562	0.3719	1	1	3	KMT	0	0.25630186	0.33724211	2.965228749	»O¥_¥«¤j¦w°Ï¥Á¬·¨½
»O¥_¥«¤j¦w°Ï¥Á¬·¨½	­S¬î¼z	»O¥_¥«¤j¦w°Ï¥Á¬·¨½­S¬î¼z	3	0	1962	µLÄÒÄy¤Î¥¼¸g¬FÄÒ±ÀÂË	0	0	1195	0.2845	0	0	3	KMT	0	0.33724211	0.33724211	2.965228749	»O¥_¥«¤j¦w°Ï¥Á¬·¨½
»O¥_¥«¤j¦w°Ï¤¯·R¨½	¾G¨q­¦	»O¥_¥«¤j¦w°Ï¤¯·R¨½¾G¨q­¦	1	1	1952	¤¤°ê°ê¥ÁÄÒ	1	0	2337	1	1	1	1	KMT	0	1	1	1	»O¥_¥«¤j¦w°Ï¤¯·R¨½
»O¥_¥«¤j¦w°Ï¸q§ø¨½	¼ï©ú?	»O¥_¥«¤j¦w°Ï¸q§ø¨½¼ï©ú?	1	1	1952	¤¤°ê°ê¥ÁÄÒ	1	0	2848	1	1	0	1	KMT	0	1	1	1	»O¥_¥«¤j¦w°Ï¸q§ø¨½
»O¥_¥«¤j¦w°Ï¥Á½÷¨½	ªL¥|®ü	»O¥_¥«¤j¦w°Ï¥Á½÷¨½ªL¥|®ü	1	1	1940	µLÄÒÄy¤Î¥¼¸g¬FÄÒ±ÀÂË	0	0	1353	0.3895	0	0	2	KMT	0	0.15171025	0.52429841	1.907310762	»O¥_¥«¤j¦w°Ï¥Á½÷¨½
»O¥_¥«¤j¦w°Ï¥Á½÷¨½	³¯®Ù¯E	»O¥_¥«¤j¦w°Ï¥Á½÷¨½³¯®Ù¯E	2	1	1947	¤¤°ê°ê¥ÁÄÒ	1	0	2120	0.6104	1	1	2	KMT	0	0.52429841	0.52429841	1.907310762	»O¥_¥«¤j¦w°Ï¥Á½÷¨½
»O¥_¥«¤j¦w°Ï©÷¶©¨½	±i©÷¶i	»O¥_¥«¤j¦w°Ï©÷¶©¨½±i©÷¶i	1	1	1963	µLÄÒÄy¤Î¥¼¸g¬FÄÒ±ÀÂË	0	0	882	0.4941	0	0	2	KMT	0	0.24413481	0.49996845	2.000126208	»O¥_¥«¤j¦w°Ï©÷¶©¨½
»O¥_¥«¤j¦w°Ï©÷¶©¨½	¤ý§Ó­è	»O¥_¥«¤j¦w°Ï©÷¶©¨½¤ý§Ó­è	2	1	1966	¤¤°ê°ê¥ÁÄÒ	1	0	903	0.5058	1	0	2	KMT	0	0.49996845	0.49996845	2.000126208	»O¥_¥«¤j¦w°Ï©÷¶©¨½
»O¥_¥«¤j¦w°Ï¸Û¦w¨½	³\¤å¶i	»O¥_¥«¤j¦w°Ï¸Û¦w¨½³\¤å¶i	1	1	1944	¤¤°ê°ê¥ÁÄÒ	1	0	1138	0.4597	0	1	2	KMT	0	0.21132409	0.50314013	1.987517871	»O¥_¥«¤j¦w°Ï¸Û¦w¨½
»O¥_¥«¤j¦w°Ï¸Û¦w¨½	§õ¦³ºÖ	»O¥_¥«¤j¦w°Ï¸Û¦w¨½§õ¦³ºÖ	2	1	1957	µLÄÒÄy¤Î¥¼¸g¬FÄÒ±ÀÂË	0	0	1337	0.5402	1	0	2	KMT	0	0.50314013	0.50314013	1.987517871	»O¥_¥«¤j¦w°Ï¸Û¦w¨½
»O¥_¥«¤j¦w°Ï¥úªZ¨½	§º©¾¸Û	»O¥_¥«¤j¦w°Ï¥úªZ¨½§º©¾¸Û	1	1	1949	¤¤°ê°ê¥ÁÄÒ	1	0	2092	0.5188	1	1	3	KMT	0	0.26915344	0.38572436	2.59252488	»O¥_¥«¤j¦w°Ï¥úªZ¨½
»O¥_¥«¤j¦w°Ï¥úªZ¨½	ÅÇ¥x©ú	»O¥_¥«¤j¦w°Ï¥úªZ¨½ÅÇ¥x©ú	2	1	1958	µLÄÒÄy¤Î¥¼¸g¬FÄÒ±ÀÂË	0	0	885	0.2194	0	0	3	KMT	0	0.3172898	0.38572436	2.59252488	»O¥_¥«¤j¦w°Ï¥úªZ¨½
»O¥_¥«¤j¦w°Ï¥úªZ¨½	ÁÂÂE»Ê	»O¥_¥«¤j¦w°Ï¥úªZ¨½ÁÂÂE»Ê	3	1	1947	µLÄÒÄy¤Î¥¼¸g¬FÄÒ±ÀÂË	0	0	1055	0.2616	0	0	3	KMT	0	0.38572436	0.38572436	2.59252488	»O¥_¥«¤j¦w°Ï¥úªZ¨½
»O¥_¥«¤j¦w°ÏÀs©Y¨½	¶À¥@¸à	»O¥_¥«¤j¦w°ÏÀs©Y¨½¶À¥@¸à	1	1	1968	¤¤°ê°ê¥ÁÄÒ	1	0	2731	1	1	1	1	KMT	0	1	1	1	»O¥_¥«¤j¦w°ÏÀs©Y¨½
»O¥_¥«¤j¦w°ÏÀs¬u¨½	§õªY½¬	»O¥_¥«¤j¦w°ÏÀs¬u¨½§õªY½¬	1	0	1959	¤¤°ê°ê¥ÁÄÒ	1	0	786	0.3296	0	0	2	KMT	0	0.10863616	0.55793825	1.792313038	»O¥_¥«¤j¦w°ÏÀs¬u¨½
»O¥_¥«¤j¦w°ÏÀs¬u¨½	?ºû¨}	»O¥_¥«¤j¦w°ÏÀs¬u¨½?ºû¨}	2	1	1974	µLÄÒÄy¤Î¥¼¸g¬FÄÒ±ÀÂË	0	0	1598	0.6703	1	1	2	KMT	0	0.55793825	0.55793825	1.792313038	»O¥_¥«¤j¦w°ÏÀs¬u¨½
»O¥_¥«¤j¦w°Ï¥j­·¨½	¤Õ¾Ë®S	»O¥_¥«¤j¦w°Ï¥j­·¨½¤Õ¾Ë®S	1	0	1961	µLÄÒÄy¤Î¥¼¸g¬FÄÒ±ÀÂË	0	0	1228	0.5198	1	0	2	KMT	0	0.27019204	0.50068805	1.997251582	»O¥_¥«¤j¦w°Ï¥j­·¨½
»O¥_¥«¤j¦w°Ï¥j­·¨½	ªL¤åÀs	»O¥_¥«¤j¦w°Ï¥j­·¨½ªL¤åÀs	2	1	1947	¤¤°ê°ê¥ÁÄÒ	1	0	1134	0.4801	0	1	2	KMT	0	0.50068805	0.50068805	1.997251582	»O¥_¥«¤j¦w°Ï¥j­·¨½
»O¥_¥«¤j¦w°Ï¥j²ø¨½	¶À¼y¶§	»O¥_¥«¤j¦w°Ï¥j²ø¨½¶À¼y¶§	1	1	1949	µLÄÒÄy¤Î¥¼¸g¬FÄÒ±ÀÂË	0	0	1461	0.4242	0	0	2	KMT	0	0.17994564	0.51137613	1.955507779	»O¥_¥«¤j¦w°Ï¥j²ø¨½
»O¥_¥«¤j¦w°Ï¥j²ø¨½	¼B§J¨k	»O¥_¥«¤j¦w°Ï¥j²ø¨½¼B§J¨k	2	1	1943	¤¤°ê°ê¥ÁÄÒ	1	0	1983	0.5757	1	1	2	KMT	0	0.51137613	0.51137613	1.955507779	»O¥_¥«¤j¦w°Ï¥j²ø¨½
»O¥_¥«¤j¦w°ÏÀs¦w¨½	ªLºÑ·×	»O¥_¥«¤j¦w°ÏÀs¦w¨½ªLºÑ·×	1	1	1953	µLÄÒÄy¤Î¥¼¸g¬FÄÒ±ÀÂË	0	0	1492	0.4866	0	0	2	KMT	0	0.23677956	0.50025645	1.998974726	»O¥_¥«¤j¦w°ÏÀs¦w¨½
»O¥_¥«¤j¦w°ÏÀs¦w¨½	¬x¬î¥Ò	»O¥_¥«¤j¦w°ÏÀs¦w¨½¬x¬î¥Ò	2	1	1956	¤¤°ê°ê¥ÁÄÒ	1	0	1574	0.5133	1	1	2	KMT	0	0.50025645	0.50025645	1.998974726	»O¥_¥«¤j¦w°ÏÀs¦w¨½
»O¥_¥«¤j¦w°ÏÀA¦w¨½	¶À§ÓµO	»O¥_¥«¤j¦w°ÏÀA¦w¨½¶À§ÓµO	1	1	1964	¤¤°ê°ê¥ÁÄÒ	1	0	1439	0.4926	0	1	2	KMT	0	0.24265476	0.50000805	1.999967801	»O¥_¥«¤j¦w°ÏÀA¦w¨½
»O¥_¥«¤j¦w°ÏÀA¦w¨½	ÅÇ§Ó¼z	»O¥_¥«¤j¦w°ÏÀA¦w¨½ÅÇ§Ó¼z	2	0	1955	µLÄÒÄy¤Î¥¼¸g¬FÄÒ±ÀÂË	0	0	1482	0.5073	1	0	2	KMT	0	0.50000805	0.50000805	1.999967801	»O¥_¥«¤j¦w°ÏÀA¦w¨½
»O¥_¥«¤j¦w°ÏºÖ¦í¨½	§õªYÍ²	»O¥_¥«¤j¦w°ÏºÖ¦í¨½§õªYÍ²	1	0	1954	µLÄÒÄy¤Î¥¼¸g¬FÄÒ±ÀÂË	0	0	2742	1	1	1	1	KMT	0	1	1	1	»O¥_¥«¤j¦w°ÏºÖ¦í¨½
»O¥_¥«¤j¦w°Ï¥Ã±d¨½	¶À¾Ç¶Q	»O¥_¥«¤j¦w°Ï¥Ã±d¨½¶À¾Ç¶Q	1	1	1952	¤¤°ê°ê¥ÁÄÒ	1	0	1031	0.5429	1	1	2	KMT	0	0.29474041	0.50358941	1.985744696	»O¥_¥«¤j¦w°Ï¥Ã±d¨½
»O¥_¥«¤j¦w°Ï¥Ã±d¨½	®}¥É¶¯	»O¥_¥«¤j¦w°Ï¥Ã±d¨½®}¥É¶¯	2	1	1968	µLÄÒÄy¤Î¥¼¸g¬FÄÒ±ÀÂË	0	0	868	0.457	0	0	2	KMT	0	0.50358941	0.50358941	1.985744696	»O¥_¥«¤j¦w°Ï¥Ã±d¨½
»O¥_¥«¤j¦w°Ï¥ú©ú¨½	±i´f»Í	»O¥_¥«¤j¦w°Ï¥ú©ú¨½±i´f»Í	1	1	1946	¤¤°ê°ê¥ÁÄÒ	1	0	1714	1	1	1	1	KMT	0	1	1	1	»O¥_¥«¤j¦w°Ï¥ú©ú¨½
»O¥_¥«¤j¦w°ÏÀA®õ¨½	³¯ºõºû	»O¥_¥«¤j¦w°ÏÀA®õ¨½³¯ºõºû	1	1	1955	¤¤°ê°ê¥ÁÄÒ	1	0	1353	0.5672	1	1	3	KMT	0	0.32171584	0.45909522	2.178197368	»O¥_¥«¤j¦w°ÏÀA®õ¨½
»O¥_¥«¤j¦w°ÏÀA®õ¨½	¾G²D³Ó	»O¥_¥«¤j¦w°ÏÀA®õ¨½¾G²D³Ó	2	1	1967	µLÄÒÄy¤Î¥¼¸g¬FÄÒ±ÀÂË	0	0	869	0.3643	0	0	3	KMT	0	0.45443033	0.45909522	2.178197368	»O¥_¥«¤j¦w°ÏÀA®õ¨½
»O¥_¥«¤j¦w°ÏÀA®õ¨½	±i¬KºÖ	»O¥_¥«¤j¦w°ÏÀA®õ¨½±i¬KºÖ	3	1	1953	µLÄÒÄy¤Î¥¼¸g¬FÄÒ±ÀÂË	0	0	163	0.0683	0	0	3	KMT	0	0.45909522	0.45909522	2.178197368	»O¥_¥«¤j¦w°ÏÀA®õ¨½
»O¥_¥«¤j¦w°ÏÀAµØ¨½	·Å¬ü¯]	»O¥_¥«¤j¦w°ÏÀAµØ¨½·Å¬ü¯]	1	0	1963	¤¤°ê°ê¥ÁÄÒ	1	0	2538	1	1	1	1	KMT	0	1	1	1	»O¥_¥«¤j¦w°ÏÀAµØ¨½
»O¥_¥«¤j¦w°ÏÀs¹Ï¨½	³¯¥¿¸Î	»O¥_¥«¤j¦w°ÏÀs¹Ï¨½³¯¥¿¸Î	1	1	1957	µLÄÒÄy¤Î¥¼¸g¬FÄÒ±ÀÂË	0	0	929	0.2651	0	0	3	KMT	0	0.07027801	0.36309875	2.754071723	»O¥_¥«¤j¦w°ÏÀs¹Ï¨½
»O¥_¥«¤j¦w°ÏÀs¹Ï¨½	¿½¸U©~	»O¥_¥«¤j¦w°ÏÀs¹Ï¨½¿½¸U©~	2	1	1958	µLÄÒÄy¤Î¥¼¸g¬FÄÒ±ÀÂË	0	0	913	0.2605	0	0	3	KMT	0	0.13813826	0.36309875	2.754071723	»O¥_¥«¤j¦w°ÏÀs¹Ï¨½
»O¥_¥«¤j¦w°ÏÀs¹Ï¨½	¶À´¼§»	»O¥_¥«¤j¦w°ÏÀs¹Ï¨½¶À´¼§»	3	1	1957	¤¤°ê°ê¥ÁÄÒ	1	0	1662	0.4743	1	1	3	KMT	0	0.36309875	0.36309875	2.754071723	»O¥_¥«¤j¦w°ÏÀs¹Ï¨½
»O¥_¥«¤j¦w°Ï·sÀs¨½	¯Î¥@ªN	»O¥_¥«¤j¦w°Ï·sÀs¨½¯Î¥@ªN	1	1	1957	¤¤°ê°ê¥ÁÄÒ	1	0	2919	1	1	1	1	KMT	0	1	1	1	»O¥_¥«¤j¦w°Ï·sÀs¨½
»O¥_¥«¤j¦w°ÏÀs°}¨½	´åµâ­^	»O¥_¥«¤j¦w°ÏÀs°}¨½´åµâ­^	1	0	1957	µLÄÒÄy¤Î¥¼¸g¬FÄÒ±ÀÂË	0	0	806	0.4027	0	0	2	KMT	0	0.16216729	0.51881513	1.927468846	»O¥_¥«¤j¦w°ÏÀs°}¨½
»O¥_¥«¤j¦w°ÏÀs°}¨½	¼Bªø«C	»O¥_¥«¤j¦w°ÏÀs°}¨½¼Bªø«C	2	1	1953	¤¤°ê°ê¥ÁÄÒ	1	0	1195	0.5972	1	1	2	KMT	0	0.51881513	0.51881513	1.927468846	»O¥_¥«¤j¦w°ÏÀs°}¨½
»O¥_¥«¤j¦w°ÏÀs¶³¨½	¶À¼s©ú	»O¥_¥«¤j¦w°ÏÀs¶³¨½¶À¼s©ú	1	1	1951	µLÄÒÄy¤Î¥¼¸g¬FÄÒ±ÀÂË	0	0	1392	0.5147	1	1	2	KMT	0	0.26491609	0.50033513	1.998660378	»O¥_¥«¤j¦w°ÏÀs¶³¨½
»O¥_¥«¤j¦w°ÏÀs¶³¨½	±i®ÑøÊ	»O¥_¥«¤j¦w°ÏÀs¶³¨½±i®ÑøÊ	2	1	1954	¤¤°ê°ê¥ÁÄÒ	1	0	1312	0.4852	0	0	2	KMT	0	0.50033513	0.50033513	1.998660378	»O¥_¥«¤j¦w°ÏÀs¶³¨½
»O¥_¥«¤j¦w°ÏÀs¥Í¨½	¨H»ñ¶³	»O¥_¥«¤j¦w°ÏÀs¥Í¨½¨H»ñ¶³	1	1	1953	µLÄÒÄy¤Î¥¼¸g¬FÄÒ±ÀÂË	0	0	1984	0.5658	1	0	2	KMT	0	0.32012964	0.50857245	1.966288186	»O¥_¥«¤j¦w°ÏÀs¥Í¨½
»O¥_¥«¤j¦w°ÏÀs¥Í¨½	ªL°·ªv	»O¥_¥«¤j¦w°ÏÀs¥Í¨½ªL°·ªv	2	1	1937	¤¤°ê°ê¥ÁÄÒ	1	0	1522	0.4341	0	1	2	KMT	0	0.50857245	0.50857245	1.966288186	»O¥_¥«¤j¦w°ÏÀs¥Í¨½
»O¥_¥«¤j¦w°Ï¦í¦w¨½	®}²ÐÄP	»O¥_¥«¤j¦w°Ï¦í¦w¨½®}²ÐÄP	1	1	1953	µLÄÒÄy¤Î¥¼¸g¬FÄÒ±ÀÂË	0	0	496	0.1775	0	0	4	KMT	0	0.03150625	0.31900234	3.134773243	»O¥_¥«¤j¦w°Ï¦í¦w¨½
»O¥_¥«¤j¦w°Ï¦í¦w¨½	¼Ú¨q¯]	»O¥_¥«¤j¦w°Ï¦í¦w¨½¼Ú¨q¯]	2	0	1961	µLÄÒÄy¤Î¥¼¸g¬FÄÒ±ÀÂË	0	0	1122	0.4015	1	0	4	KMT	0	0.1927085	0.31900234	3.134773243	»O¥_¥«¤j¦w°Ï¦í¦w¨½
»O¥_¥«¤j¦w°Ï¦í¦w¨½	´¿¥É®Ú	»O¥_¥«¤j¦w°Ï¦í¦w¨½´¿¥É®Ú	3	1	1960	µLÄÒÄy¤Î¥¼¸g¬FÄÒ±ÀÂË	0	0	204	0.073	0	0	4	KMT	0	0.1980375	0.31900234	3.134773243	»O¥_¥«¤j¦w°Ï¦í¦w¨½
»O¥_¥«¤j¦w°Ï¦í¦w¨½	³¯®a÷~	»O¥_¥«¤j¦w°Ï¦í¦w¨½³¯®a÷~	4	1	1933	¤¤°ê°ê¥ÁÄÒ	1	0	972	0.3478	0	1	4	KMT	0	0.31900234	0.31900234	3.134773243	»O¥_¥«¤j¦w°Ï¦í¦w¨½
»O¥_¥«¤j¦w°Ï¸q¦w¨½	¿c¬Õ¨q	»O¥_¥«¤j¦w°Ï¸q¦w¨½¿c¬Õ¨q	1	0	1949	¤¤°ê°ê¥ÁÄÒ	1	0	2256	1	1	1	1	KMT	0	1	1	1	»O¥_¥«¤j¦w°Ï¸q¦w¨½
»O¥_¥«¤j¦w°Ï³q¤Æ¨½	©P¶i°]	»O¥_¥«¤j¦w°Ï³q¤Æ¨½©P¶i°]	1	1	1962	¤¤°ê°ê¥ÁÄÒ	1	0	1290	0.3704	1	1	4	KMT	0	0.13719616	0.27954366	3.577258737	»O¥_¥«¤j¦w°Ï³q¤Æ¨½
»O¥_¥«¤j¦w°Ï³q¤Æ¨½	³¯¥Ã­Z	»O¥_¥«¤j¦w°Ï³q¤Æ¨½³¯¥Ã­Z	2	1	1947	µLÄÒÄy¤Î¥¼¸g¬FÄÒ±ÀÂË	0	0	942	0.2705	0	0	4	KMT	0	0.21036641	0.27954366	3.577258737	»O¥_¥«¤j¦w°Ï³q¤Æ¨½
»O¥_¥«¤j¦w°Ï³q¤Æ¨½	¾G³sºÖ	»O¥_¥«¤j¦w°Ï³q¤Æ¨½¾G³sºÖ	3	1	1948	¥Á¥D¶i¨BÄÒ	0	1	455	0.1306	0	0	4	KMT	0	0.22742277	0.27954366	3.577258737	»O¥_¥«¤j¦w°Ï³q¤Æ¨½
»O¥_¥«¤j¦w°Ï³q¤Æ¨½	¤ý¬±ºa	»O¥_¥«¤j¦w°Ï³q¤Æ¨½¤ý¬±ºa	4	1	1957	µLÄÒÄy¤Î¥¼¸g¬FÄÒ±ÀÂË	0	0	795	0.2283	0	0	4	KMT	0	0.27954366	0.27954366	3.577258737	»O¥_¥«¤j¦w°Ï³q¤Æ¨½
»O¥_¥«¤j¦w°Ï³q¦w¨½	ªLÀA·×	»O¥_¥«¤j¦w°Ï³q¦w¨½ªLÀA·×	1	1	1943	µLÄÒÄy¤Î¥¼¸g¬FÄÒ±ÀÂË	0	0	1397	0.4503	0	1	2	KMT	0	0.20277009	0.50483025	1.980863865	»O¥_¥«¤j¦w°Ï³q¦w¨½
»O¥_¥«¤j¦w°Ï³q¦w¨½	¾G¤å©ú	»O¥_¥«¤j¦w°Ï³q¦w¨½¾G¤å©ú	2	1	1960	µLÄÒÄy¤Î¥¼¸g¬FÄÒ±ÀÂË	0	0	1705	0.5496	1	0	2	KMT	0	0.50483025	0.50483025	1.980863865	»O¥_¥«¤j¦w°Ï³q¦w¨½
»O¥_¥«¤j¦w°ÏÁ{¦¿¨½	¶Àª÷°]	»O¥_¥«¤j¦w°ÏÁ{¦¿¨½¶Àª÷°]	1	1	1948	µLÄÒÄy¤Î¥¼¸g¬FÄÒ±ÀÂË	0	0	1429	0.5961	1	1	2	KMT	0	0.35533521	0.51838965	1.92905086	»O¥_¥«¤j¦w°ÏÁ{¦¿¨½
»O¥_¥«¤j¦w°ÏÁ{¦¿¨½	³¯¥¿¸q	»O¥_¥«¤j¦w°ÏÁ{¦¿¨½³¯¥¿¸q	2	1	1955	µLÄÒÄy¤Î¥¼¸g¬FÄÒ±ÀÂË	0	0	968	0.4038	0	0	2	KMT	0	0.51838965	0.51838965	1.92905086	»O¥_¥«¤j¦w°ÏÁ{¦¿¨½
»O¥_¥«¤j¦w°Ïªkªv¨½	ªL¦¸­¦	»O¥_¥«¤j¦w°Ïªkªv¨½ªL¦¸­¦	1	1	1939	¤¤°ê°ê¥ÁÄÒ	1	0	2073	1	1	1	1	KMT	0	1	1	1	»O¥_¥«¤j¦w°Ïªkªv¨½
»O¥_¥«¤j¦w°Ï¥þ¦w¨½	ªLÄR¯]	»O¥_¥«¤j¦w°Ï¥þ¦w¨½ªLÄR¯]	1	0	1951	¤¤°ê°ê¥ÁÄÒ	1	0	2057	1	1	1	1	KMT	0	1	1	1	»O¥_¥«¤j¦w°Ï¥þ¦w¨½
»O¥_¥«¤j¦w°Ï¸s½å¨½	¯ÎÂE·½	»O¥_¥«¤j¦w°Ï¸s½å¨½¯ÎÂE·½	1	1	1961	¤¤°ê°ê¥ÁÄÒ	1	0	2767	1	1	1	1	KMT	0	1	1	1	»O¥_¥«¤j¦w°Ï¸s½å¨½
»O¥_¥«¤j¦w°Ï¸s­^¨½	Ã¹°ê·ë	»O¥_¥«¤j¦w°Ï¸s­^¨½Ã¹°ê·ë	1	1	1962	µLÄÒÄy¤Î¥¼¸g¬FÄÒ±ÀÂË	0	0	508	0.1284	0	0	3	KMT	0	0.01648656	0.43972569	2.274145047	»O¥_¥«¤j¦w°Ï¸s­^¨½
»O¥_¥«¤j¦w°Ï¸s­^¨½	¥Û©¾³Ó	»O¥_¥«¤j¦w°Ï¸s­^¨½¥Û©¾³Ó	2	1	1953	¤¤°ê°ê¥ÁÄÒ	1	0	2306	0.5832	1	1	3	KMT	0	0.3566088	0.43972569	2.274145047	»O¥_¥«¤j¦w°Ï¸s­^¨½
»O¥_¥«¤j¦w°Ï¸s­^¨½	¨H·çÄË	»O¥_¥«¤j¦w°Ï¸s­^¨½¨H·çÄË	3	1	1950	µLÄÒÄy¤Î¥¼¸g¬FÄÒ±ÀÂË	0	0	1140	0.2883	0	0	3	KMT	0	0.43972569	0.43972569	2.274145047	»O¥_¥«¤j¦w°Ï¸s­^¨½
»O¥_¥«¤j¦w°Ïªê¼S¨½	·¨§d´ä	»O¥_¥«¤j¦w°Ïªê¼S¨½·¨§d´ä	1	1	1936	¤¤°ê°ê¥ÁÄÒ	1	0	1571	1	1	1	1	KMT	0	1	1	1	»O¥_¥«¤j¦w°Ïªê¼S¨½
»O¥_¥«¤j¦w°Ïª×Às¨½	±iªKà²	»O¥_¥«¤j¦w°Ïª×Às¨½±iªKà²	1	1	1954	¤¤°ê°ê¥ÁÄÒ	1	0	914	1	1	1	1	KMT	0	1	1	1	»O¥_¥«¤j¦w°Ïª×Às¨½
»O¥_¥«¤j¦w°ÏÀs²W¨½	¨L¦N¬î	»O¥_¥«¤j¦w°ÏÀs²W¨½¨L¦N¬î	1	1	1953	¤¤°ê°ê¥ÁÄÒ	1	0	4211	1	1	1	1	KMT	0	1	1	1	»O¥_¥«¤j¦w°ÏÀs²W¨½
»O¥_¥«¤j¦w°ÏÀsªù¨½	¶À¤j¸g	»O¥_¥«¤j¦w°ÏÀsªù¨½¶À¤j¸g	1	1	1936	¤¤°ê°ê¥ÁÄÒ	1	0	1222	0.5579	1	1	2	KMT	0	0.31125241	0.50661641	1.973880001	»O¥_¥«¤j¦w°ÏÀsªù¨½
»O¥_¥«¤j¦w°ÏÀsªù¨½	³¯±ö­^	»O¥_¥«¤j¦w°ÏÀsªù¨½³¯±ö­^	2	0	1946	µLÄÒÄy¤Î¥¼¸g¬FÄÒ±ÀÂË	0	0	968	0.442	0	0	2	KMT	0	0.50661641	0.50661641	1.973880001	»O¥_¥«¤j¦w°ÏÀsªù¨½
»O¥_¥«¤j¦w°Ï¤j¾Ç¨½	¦ó©Ó¿«	»O¥_¥«¤j¦w°Ï¤j¾Ç¨½¦ó©Ó¿«	1	1	1983	µLÄÒÄy¤Î¥¼¸g¬FÄÒ±ÀÂË	0	0	1015	0.2292	0	0	3	KMT	0	0.05253264	0.35439273	2.821728313	»O¥_¥«¤j¦w°Ï¤j¾Ç¨½
»O¥_¥«¤j¦w°Ï¤j¾Ç¨½	³\ªµÁI	»O¥_¥«¤j¦w°Ï¤j¾Ç¨½³\ªµÁI	2	0	1945	µLÄÒÄy¤Î¥¼¸g¬FÄÒ±ÀÂË	0	0	1488	0.336	0	0	3	KMT	0	0.16542864	0.35439273	2.821728313	»O¥_¥«¤j¦w°Ï¤j¾Ç¨½
»O¥_¥«¤j¦w°Ï¤j¾Ç¨½	°ªÃ¹¬ü´f	»O¥_¥«¤j¦w°Ï¤j¾Ç¨½°ªÃ¹¬ü´f	3	0	1942	¤¤°ê°ê¥ÁÄÒ	1	0	1925	0.4347	1	1	3	KMT	0	0.35439273	0.35439273	2.821728313	»O¥_¥«¤j¦w°Ï¤j¾Ç¨½
»O¥_¥«¤j¦w°ÏªÚ©M¨½	¶ÀºØºa	»O¥_¥«¤j¦w°ÏªÚ©M¨½¶ÀºØºa	1	1	1950	¤¤°ê°ê¥ÁÄÒ	1	0	2964	1	1	1	1	KMT	0	1	1	1	»O¥_¥«¤j¦w°ÏªÚ©M¨½
»O¥_¥«¤j¦w°Ï¾¤¤¸¨½	¬_ª¢½÷	»O¥_¥«¤j¦w°Ï¾¤¤¸¨½¬_ª¢½÷	1	1	1948	µLÄÒÄy¤Î¥¼¸g¬FÄÒ±ÀÂË	0	0	1535	0.4577	1	0	3	KMT	0	0.20948929	0.38077974	2.626190143	»O¥_¥«¤j¦w°Ï¾¤¤¸¨½
»O¥_¥«¤j¦w°Ï¾¤¤¸¨½	³¯©M¼w	»O¥_¥«¤j¦w°Ï¾¤¤¸¨½³¯©M¼w	2	1	1960	µLÄÒÄy¤Î¥¼¸g¬FÄÒ±ÀÂË	0	0	539	0.1607	0	0	3	KMT	0	0.23531378	0.38077974	2.626190143	»O¥_¥«¤j¦w°Ï¾¤¤¸¨½
»O¥_¥«¤j¦w°Ï¾¤¤¸¨½	´¿·Øµo	»O¥_¥«¤j¦w°Ï¾¤¤¸¨½´¿·Øµo	3	1	1940	¤¤°ê°ê¥ÁÄÒ	1	0	1279	0.3814	0	1	3	KMT	0	0.38077974	0.38077974	2.626190143	»O¥_¥«¤j¦w°Ï¾¤¤¸¨½
»O¥_¥«¤j¦w°Ï¾¤§µ¨½	¤è¤B½÷	»O¥_¥«¤j¦w°Ï¾¤§µ¨½¤è¤B½÷	1	1	1968	¤¤°ê°ê¥ÁÄÒ	1	0	2585	0.5939	1	1	2	KMT	0	0.35271721	0.51755321	1.932168482	»O¥_¥«¤j¦w°Ï¾¤§µ¨½
»O¥_¥«¤j¦w°Ï¾¤§µ¨½	¶À§»¹F	»O¥_¥«¤j¦w°Ï¾¤§µ¨½¶À§»¹F	2	1	1953	µLÄÒÄy¤Î¥¼¸g¬FÄÒ±ÀÂË	0	0	1767	0.406	0	0	2	KMT	0	0.51755321	0.51755321	1.932168482	»O¥_¥«¤j¦w°Ï¾¤§µ¨½
»O¥_¥«¤j¦w°Ï¾¤©M¨½	³¯¤ôªe	»O¥_¥«¤j¦w°Ï¾¤©M¨½³¯¤ôªe	1	1	1967	µLÄÒÄy¤Î¥¼¸g¬FÄÒ±ÀÂË	0	0	849	0.3281	0	0	3	KMT	0	0.10764961	0.40741973	2.454471216	»O¥_¥«¤j¦w°Ï¾¤©M¨½
»O¥_¥«¤j¦w°Ï¾¤©M¨½	§õ¥Vµo	»O¥_¥«¤j¦w°Ï¾¤©M¨½§õ¥Vµo	2	1	1950	¤¤°ê°ê¥ÁÄÒ	1	0	1367	0.5284	1	1	3	KMT	0	0.38685617	0.40741973	2.454471216	»O¥_¥«¤j¦w°Ï¾¤©M¨½
»O¥_¥«¤j¦w°Ï¾¤©M¨½	³¯¥Ãëù	»O¥_¥«¤j¦w°Ï¾¤©M¨½³¯¥Ãëù	3	1	1957	µLÄÒÄy¤Î¥¼¸g¬FÄÒ±ÀÂË	0	0	371	0.1434	0	0	3	KMT	0	0.40741973	0.40741973	2.454471216	»O¥_¥«¤j¦w°Ï¾¤©M¨½
»O¥_¥«¤j¦w°Ï«Ø¦w¨½	·Å¶i«G	»O¥_¥«¤j¦w°Ï«Ø¦w¨½·Å¶i«G	1	1	1949	¤¤°ê°ê¥ÁÄÒ	1	0	2220	1	1	1	1	KMT	0	1	1	1	»O¥_¥«¤j¦w°Ï«Ø¦w¨½
»O¥_¥«¤j¦w°Ï«Ø­Û¨½	ªL¥¿¹F	»O¥_¥«¤j¦w°Ï«Ø­Û¨½ªL¥¿¹F	1	1	1977	µLÄÒÄy¤Î¥¼¸g¬FÄÒ±ÀÂË	0	0	1397	0.4504	1	0	3	KMT	0	0.20286016	0.40453332	2.471984261	»O¥_¥«¤j¦w°Ï«Ø­Û¨½
»O¥_¥«¤j¦w°Ï«Ø­Û¨½	³¯ÀA¤¸	»O¥_¥«¤j¦w°Ï«Ø­Û¨½³¯ÀA¤¸	2	1	1977	¤¤°ê°ê¥ÁÄÒ	1	0	1346	0.434	0	0	3	KMT	0	0.39121616	0.40453332	2.471984261	»O¥_¥«¤j¦w°Ï«Ø­Û¨½
»O¥_¥«¤j¦w°Ï«Ø­Û¨½	­S³·Áø	»O¥_¥«¤j¦w°Ï«Ø­Û¨½­S³·Áø	3	0	1948	µLÄÒÄy¤Î¥¼¸g¬FÄÒ±ÀÂË	0	0	358	0.1154	0	0	3	KMT	0	0.40453332	0.40453332	2.471984261	»O¥_¥«¤j¦w°Ï«Ø­Û¨½
»O¥_¥«¤j¦w°Ï´°¦w¨½	°ªºa©v	»O¥_¥«¤j¦w°Ï´°¦w¨½°ªºa©v	1	1	1952	¤¤°ê°ê¥ÁÄÒ	1	0	2516	1	1	1	1	KMT	0	1	1	1	»O¥_¥«¤j¦w°Ï´°¦w¨½
»O¥_¥«¤j¦w°Ï¥¿Án¨½	³¯?·R	»O¥_¥«¤j¦w°Ï¥¿Án¨½³¯?·R	1	1	1953	¤¤°ê°ê¥ÁÄÒ	1	0	2087	1	1	1	1	KMT	0	1	1	1	»O¥_¥«¤j¦w°Ï¥¿Án¨½
»O¥_¥«¤j¦w°Ï´°·×¨½	³Å¦N¥Ð	»O¥_¥«¤j¦w°Ï´°·×¨½³Å¦N¥Ð	1	1	1959	¤¤°ê°ê¥ÁÄÒ	1	0	2642	1	1	1	1	KMT	0	1	1	1	»O¥_¥«¤j¦w°Ï´°·×¨½
»O¥_¥«¤j¦w°ÏµØÁn¨½	³¯ª÷ªá	»O¥_¥«¤j¦w°ÏµØÁn¨½³¯ª÷ªá	1	0	1955	¤¤°ê°ê¥ÁÄÒ	1	0	2001	1	1	1	1	KMT	0	1	1	1	»O¥_¥«¤j¦w°ÏµØÁn¨½
»O¥_¥«¤j¦w°Ï¨®¼h¨½	§õ­×	»O¥_¥«¤j¦w°Ï¨®¼h¨½§õ­×	1	1	1948	¤¤°ê°ê¥ÁÄÒ	1	0	1410	0.4187	0	0	2	KMT	0	0.17530969	0.51310313	1.94892594	»O¥_¥«¤j¦w°Ï¨®¼h¨½
»O¥_¥«¤j¦w°Ï¨®¼h¨½	¬I®Û­^	»O¥_¥«¤j¦w°Ï¨®¼h¨½¬I®Û­^	2	0	1954	µLÄÒÄy¤Î¥¼¸g¬FÄÒ±ÀÂË	0	0	1957	0.5812	1	1	2	KMT	0	0.51310313	0.51310313	1.94892594	»O¥_¥«¤j¦w°Ï¨®¼h¨½
»O¥_¥«¤j¦w°Ï¥ú«H¨½	³¯´¿®®¤l	»O¥_¥«¤j¦w°Ï¥ú«H¨½³¯´¿®®¤l	1	0	1939	¤¤°ê°ê¥ÁÄÒ	1	0	3162	1	1	1	1	KMT	0	1	1	1	»O¥_¥«¤j¦w°Ï¥ú«H¨½
»O¥_¥«¤j¦w°Ï¾Ç©²¨½	§õ²EµY	»O¥_¥«¤j¦w°Ï¾Ç©²¨½§õ²EµY	1	0	1952	¤¤°ê°ê¥ÁÄÒ	1	0	1602	1	1	1	1	KMT	0	1	1	1	»O¥_¥«¤j¦w°Ï¾Ç©²¨½
»O¥_¥«¤å¤s°Ï´º¦æ¨½	¤ý¸q¨å	»O¥_¥«¤å¤s°Ï´º¦æ¨½¤ý¸q¨å	1	1	1950	µLÄÒÄy¤Î¥¼¸g¬FÄÒ±ÀÂË	0	0	1644	0.4858	0	0	2	KMT	0	0.23600164	0.50030045	1.998798922	»O¥_¥«¤å¤s°Ï´º¦æ¨½
»O¥_¥«¤å¤s°Ï´º¦æ¨½	±i¤ô¬h	»O¥_¥«¤å¤s°Ï´º¦æ¨½±i¤ô¬h	2	1	1936	¤¤°ê°ê¥ÁÄÒ	1	0	1740	0.5141	1	1	2	KMT	0	0.50030045	0.50030045	1.998798922	»O¥_¥«¤å¤s°Ï´º¦æ¨½
»O¥_¥«¤å¤s°Ï´ºªF¨½	°ª»ñÁ¾	»O¥_¥«¤å¤s°Ï´ºªF¨½°ª»ñÁ¾	1	0	1966	¤¤°ê°ê¥ÁÄÒ	1	0	3212	1	1	1	1	KMT	0	1	1	1	»O¥_¥«¤å¤s°Ï´ºªF¨½
»O¥_¥«¤å¤s°Ï´º¬ü¨½	ªL½åÀB	»O¥_¥«¤å¤s°Ï´º¬ü¨½ªL½åÀB	1	1	1952	µLÄÒÄy¤Î¥¼¸g¬FÄÒ±ÀÂË	0	0	1437	0.5026	1	0	2	KMT	0	0.25260676	0.49991405	2.000343859	»O¥_¥«¤å¤s°Ï´º¬ü¨½
»O¥_¥«¤å¤s°Ï´º¬ü¨½	§õºØÀÙ	»O¥_¥«¤å¤s°Ï´º¬ü¨½§õºØÀÙ	2	1	1937	¤¤°ê°ê¥ÁÄÒ	1	0	1422	0.4973	0	1	2	KMT	0	0.49991405	0.49991405	2.000343859	»O¥_¥«¤å¤s°Ï´º¬ü¨½
»O¥_¥«¤å¤s°Ï´º¼y¨½	½²²W½÷	»O¥_¥«¤å¤s°Ï´º¼y¨½½²²W½÷	1	1	1953	µLÄÒÄy¤Î¥¼¸g¬FÄÒ±ÀÂË	0	0	720	0.1936	0	0	3	KMT	0	0.03748096	0.365333	2.737228775	»O¥_¥«¤å¤s°Ï´º¼y¨½
»O¥_¥«¤å¤s°Ï´º¼y¨½	³¯®¶©ú	»O¥_¥«¤å¤s°Ï´º¼y¨½³¯®¶©ú	2	1	1938	¤¤°ê°ê¥ÁÄÒ	1	0	1358	0.3652	0	1	3	KMT	0	0.170852	0.365333	2.737228775	»O¥_¥«¤å¤s°Ï´º¼y¨½
»O¥_¥«¤å¤s°Ï´º¼y¨½	¶À³{¼s	»O¥_¥«¤å¤s°Ï´º¼y¨½¶À³{¼s	3	1	1953	µLÄÒÄy¤Î¥¼¸g¬FÄÒ±ÀÂË	0	0	1640	0.441	1	0	3	KMT	0	0.365333	0.365333	2.737228775	»O¥_¥«¤å¤s°Ï´º¼y¨½
»O¥_¥«¤å¤s°Ï´º¤¯¨½	±i¯Õ·u	»O¥_¥«¤å¤s°Ï´º¤¯¨½±i¯Õ·u	1	1	1952	¤¤°ê°ê¥ÁÄÒ	1	0	1418	0.5511	1	1	2	KMT	0	0.30371121	0.50513265	1.979678011	»O¥_¥«¤å¤s°Ï´º¤¯¨½
»O¥_¥«¤å¤s°Ï´º¤¯¨½	¶À²Q­ë	»O¥_¥«¤å¤s°Ï´º¤¯¨½¶À²Q­ë	2	0	1948	µLÄÒÄy¤Î¥¼¸g¬FÄÒ±ÀÂË	0	0	1155	0.4488	0	0	2	KMT	0	0.50513265	0.50513265	1.979678011	»O¥_¥«¤å¤s°Ï´º¤¯¨½
»O¥_¥«¤å¤s°Ï´ºµØ¨½	¶À°ö³ó	»O¥_¥«¤å¤s°Ï´ºµØ¨½¶À°ö³ó	1	1	1964	¤¤°ê°ê¥ÁÄÒ	1	0	1534	0.4727	1	1	4	KMT	0	0.22344529	0.33439342	2.990489466	»O¥_¥«¤å¤s°Ï´ºµØ¨½
»O¥_¥«¤å¤s°Ï´ºµØ¨½	ÁÂ¬ü¼b	»O¥_¥«¤å¤s°Ï´ºµØ¨½ÁÂ¬ü¼b	2	0	1951	µLÄÒÄy¤Î¥¼¸g¬FÄÒ±ÀÂË	0	0	243	0.0748	0	0	4	KMT	0	0.22904033	0.33439342	2.990489466	»O¥_¥«¤å¤s°Ï´ºµØ¨½
»O¥_¥«¤å¤s°Ï´ºµØ¨½	³¯ª÷¬u	»O¥_¥«¤å¤s°Ï´ºµØ¨½³¯ª÷¬u	3	1	1957	µLÄÒÄy¤Î¥¼¸g¬FÄÒ±ÀÂË	0	0	861	0.2653	0	0	4	KMT	0	0.29942442	0.33439342	2.990489466	»O¥_¥«¤å¤s°Ï´ºµØ¨½
»O¥_¥«¤å¤s°Ï´ºµØ¨½	¼B¦Ë­^	»O¥_¥«¤å¤s°Ï´ºµØ¨½¼B¦Ë­^	4	0	1955	µLÄÒÄy¤Î¥¼¸g¬FÄÒ±ÀÂË	0	0	607	0.187	0	0	4	KMT	0	0.33439342	0.33439342	2.990489466	»O¥_¥«¤å¤s°Ï´ºµØ¨½
»O¥_¥«¤å¤s°Ï¸U¦³¨½	³¯°ª¬ü¬ü	»O¥_¥«¤å¤s°Ï¸U¦³¨½³¯°ª¬ü¬ü	1	0	1949	µLÄÒÄy¤Î¥¼¸g¬FÄÒ±ÀÂË	0	0	1370	0.4808	0	0	2	KMT	0	0.23116864	0.50063345	1.997469406	»O¥_¥«¤å¤s°Ï¸U¦³¨½
»O¥_¥«¤å¤s°Ï¸U¦³¨½	Ä¬¼w°]	»O¥_¥«¤å¤s°Ï¸U¦³¨½Ä¬¼w°]	2	1	1955	¤¤°ê°ê¥ÁÄÒ	1	0	1479	0.5191	1	1	2	KMT	0	0.50063345	0.50063345	1.997469406	»O¥_¥«¤å¤s°Ï¸U¦³¨½
»O¥_¥«¤å¤s°Ï¸U²»¨½	±i¬õ¤ì	»O¥_¥«¤å¤s°Ï¸U²»¨½±i¬õ¤ì	1	1	1956	µLÄÒÄy¤Î¥¼¸g¬FÄÒ±ÀÂË	0	0	2311	1	1	1	1	KMT	0	1	1	1	»O¥_¥«¤å¤s°Ï¸U²»¨½
»O¥_¥«¤å¤s°Ï¸U¶©¨½	³¯¾W	»O¥_¥«¤å¤s°Ï¸U¶©¨½³¯¾W	1	1	1960	µLÄÒÄy¤Î¥¼¸g¬FÄÒ±ÀÂË	0	0	371	0.0913	0	0	7	KMT	0	0.00833569	0.20978992	4.766673251	»O¥_¥«¤å¤s°Ï¸U¶©¨½
»O¥_¥«¤å¤s°Ï¸U¶©¨½	¦¶¤¯§g	»O¥_¥«¤å¤s°Ï¸U¶©¨½¦¶¤¯§g	2	1	1960	µLÄÒÄy¤Î¥¼¸g¬FÄÒ±ÀÂË	0	0	441	0.1086	0	0	7	KMT	0	0.02012965	0.20978992	4.766673251	»O¥_¥«¤å¤s°Ï¸U¶©¨½
»O¥_¥«¤å¤s°Ï¸U¶©¨½	ªL©v¥°	»O¥_¥«¤å¤s°Ï¸U¶©¨½ªL©v¥°	3	1	1953	µLÄÒÄy¤Î¥¼¸g¬FÄÒ±ÀÂË	0	0	653	0.1608	0	0	7	KMT	0	0.04598629	0.20978992	4.766673251	»O¥_¥«¤å¤s°Ï¸U¶©¨½
»O¥_¥«¤å¤s°Ï¸U¶©¨½	¿à¤Õ³Ó	»O¥_¥«¤å¤s°Ï¸U¶©¨½¿à¤Õ³Ó	4	1	1961	¤¤°ê°ê¥ÁÄÒ	1	0	1403	0.3455	1	1	7	KMT	0	0.16535654	0.20978992	4.766673251	»O¥_¥«¤å¤s°Ï¸U¶©¨½
»O¥_¥«¤å¤s°Ï¸U¶©¨½	¶ÀÀA½ç	»O¥_¥«¤å¤s°Ï¸U¶©¨½¶ÀÀA½ç	5	1	1957	µLÄÒÄy¤Î¥¼¸g¬FÄÒ±ÀÂË	0	0	127	0.0312	0	0	7	KMT	0	0.16632998	0.20978992	4.766673251	»O¥_¥«¤å¤s°Ï¸U¶©¨½
»O¥_¥«¤å¤s°Ï¸U¶©¨½	³¢¥ÉÀs	»O¥_¥«¤å¤s°Ï¸U¶©¨½³¢¥ÉÀs	6	1	1960	µLÄÒÄy¤Î¥¼¸g¬FÄÒ±ÀÂË	0	0	259	0.0637	0	0	7	KMT	0	0.17038767	0.20978992	4.766673251	»O¥_¥«¤å¤s°Ï¸U¶©¨½
»O¥_¥«¤å¤s°Ï¸U¶©¨½	³¯¥Éªâ	»O¥_¥«¤å¤s°Ï¸U¶©¨½³¯¥Éªâ	7	0	1954	¥Á¥D¶i¨BÄÒ	0	1	806	0.1985	0	0	7	KMT	0	0.20978992	0.20978992	4.766673251	»O¥_¥«¤å¤s°Ï¸U¶©¨½
»O¥_¥«¤å¤s°Ï¸U¦~¨½	¬x¾ð?	»O¥_¥«¤å¤s°Ï¸U¦~¨½¬x¾ð?	1	1	1964	¤¤°ê°ê¥ÁÄÒ	1	0	1346	0.4417	0	0	2	KMT	0	0.19509889	0.50668613	1.973608395	»O¥_¥«¤å¤s°Ï¸U¦~¨½
»O¥_¥«¤å¤s°Ï¸U¦~¨½	ªô¬îªÚ	»O¥_¥«¤å¤s°Ï¸U¦~¨½ªô¬îªÚ	2	0	1967	µLÄÒÄy¤Î¥¼¸g¬FÄÒ±ÀÂË	0	0	1701	0.5582	1	0	2	KMT	0	0.50668613	0.50668613	1.973608395	»O¥_¥«¤å¤s°Ï¸U¦~¨½
»O¥_¥«¤å¤s°Ï¸U©M¨½	§d¯®ºa	»O¥_¥«¤å¤s°Ï¸U©M¨½§d¯®ºa	1	1	1954	¤¤°ê°ê¥ÁÄÒ	1	0	980	1	1	1	1	KMT	0	1	1	1	»O¥_¥«¤å¤s°Ï¸U©M¨½
»O¥_¥«¤å¤s°Ï¸U²±¨½	®}ºÖ¶i	»O¥_¥«¤å¤s°Ï¸U²±¨½®}ºÖ¶i	1	1	1949	¤¤°ê°ê¥ÁÄÒ	1	0	2277	1	1	1	1	KMT	0	1	1	1	»O¥_¥«¤å¤s°Ï¸U²±¨½
»O¥_¥«¤å¤s°Ï¿³Â×¨½	§EÂE¾§	»O¥_¥«¤å¤s°Ï¿³Â×¨½§EÂE¾§	1	1	1954	¤¤°ê°ê¥ÁÄÒ	1	0	1818	0.6994	1	1	3	KMT	0	0.48916036	0.55675244	1.796130431	»O¥_¥«¤å¤s°Ï¿³Â×¨½
»O¥_¥«¤å¤s°Ï¿³Â×¨½	§õ¶®´f	»O¥_¥«¤å¤s°Ï¿³Â×¨½§õ¶®´f	2	0	1971	µLÄÒÄy¤Î¥¼¸g¬FÄÒ±ÀÂË	0	0	666	0.2562	0	0	3	KMT	0	0.5547988	0.55675244	1.796130431	»O¥_¥«¤å¤s°Ï¿³Â×¨½
»O¥_¥«¤å¤s°Ï¿³Â×¨½	³¯¤Ñ¥Á	»O¥_¥«¤å¤s°Ï¿³Â×¨½³¯¤Ñ¥Á	3	1	1954	µLÄÒÄy¤Î¥¼¸g¬FÄÒ±ÀÂË	0	0	115	0.0442	0	0	3	KMT	0	0.55675244	0.55675244	1.796130431	»O¥_¥«¤å¤s°Ï¿³Â×¨½
»O¥_¥«¤å¤s°Ï¿³¨¹¨½	±i´Â¶¯	»O¥_¥«¤å¤s°Ï¿³¨¹¨½±i´Â¶¯	1	1	1964	µLÄÒÄy¤Î¥¼¸g¬FÄÒ±ÀÂË	0	0	1387	0.5545	1	0	2	KMT	0	0.30747025	0.50585141	1.976865104	»O¥_¥«¤å¤s°Ï¿³¨¹¨½
»O¥_¥«¤å¤s°Ï¿³¨¹¨½	¶À¯P©ú	»O¥_¥«¤å¤s°Ï¿³¨¹¨½¶À¯P©ú	2	1	1964	¤¤°ê°ê¥ÁÄÒ	1	0	1114	0.4454	0	0	2	KMT	0	0.50585141	0.50585141	1.976865104	»O¥_¥«¤å¤s°Ï¿³¨¹¨½
»O¥_¥«¤å¤s°Ï¿³¥ú¨½	¬x¥¿¥­	»O¥_¥«¤å¤s°Ï¿³¥ú¨½¬x¥¿¥­	1	1	1962	¤¤°ê°ê¥ÁÄÒ	1	0	1480	1	1	1	1	KMT	0	1	1	1	»O¥_¥«¤å¤s°Ï¿³¥ú¨½
»O¥_¥«¤å¤s°Ï¿³®a¨½	¼B©v?	»O¥_¥«¤å¤s°Ï¿³®a¨½¼B©v?	1	1	1953	¤¤°ê°ê¥ÁÄÒ	1	0	3743	1	1	1	1	KMT	0	1	1	1	»O¥_¥«¤å¤s°Ï¿³®a¨½
»O¥_¥«¤å¤s°Ï¿³±o¨½	¶À²ÓºÖ	»O¥_¥«¤å¤s°Ï¿³±o¨½¶À²ÓºÖ	1	1	1950	¤¤°ê°ê¥ÁÄÒ	1	0	2849	1	1	1	1	KMT	0	1	1	1	»O¥_¥«¤å¤s°Ï¿³±o¨½
»O¥_¥«¤å¤s°Ï¿³·~¨½	¬xªøºa	»O¥_¥«¤å¤s°Ï¿³·~¨½¬xªøºa	1	1	1941	¤¤°ê°ê¥ÁÄÒ	1	0	1315	0.4325	1	1	4	KMT	0	0.18705625	0.35095854	2.849339412	»O¥_¥«¤å¤s°Ï¿³·~¨½
»O¥_¥«¤å¤s°Ï¿³·~¨½	´^µ{¶¯	»O¥_¥«¤å¤s°Ï¿³·~¨½´^µ{¶¯	2	1	1957	µLÄÒÄy¤Î¥¼¸g¬FÄÒ±ÀÂË	0	0	170	0.0559	0	0	4	KMT	0	0.19018106	0.35095854	2.849339412	»O¥_¥«¤å¤s°Ï¿³·~¨½
»O¥_¥«¤å¤s°Ï¿³·~¨½	·¨¶iµo	»O¥_¥«¤å¤s°Ï¿³·~¨½·¨¶iµo	3	1	1958	µLÄÒÄy¤Î¥¼¸g¬FÄÒ±ÀÂË	0	0	405	0.1332	0	0	4	KMT	0	0.2079233	0.35095854	2.849339412	»O¥_¥«¤å¤s°Ï¿³·~¨½
»O¥_¥«¤å¤s°Ï¿³·~¨½	»¯®Ñµ^	»O¥_¥«¤å¤s°Ï¿³·~¨½»¯®Ñµ^	4	0	1960	µLÄÒÄy¤Î¥¼¸g¬FÄÒ±ÀÂË	0	0	1150	0.3782	0	0	4	KMT	0	0.35095854	0.35095854	2.849339412	»O¥_¥«¤å¤s°Ï¿³·~¨½
»O¥_¥«¤å¤s°Ï¿³¦w¨½	§dñZµM	»O¥_¥«¤å¤s°Ï¿³¦w¨½§dñZµM	1	1	1954	µLÄÒÄy¤Î¥¼¸g¬FÄÒ±ÀÂË	0	0	145	0.0398	0	0	3	KMT	0	0.00158404	0.47808396	2.091682808	»O¥_¥«¤å¤s°Ï¿³¦w¨½
»O¥_¥«¤å¤s°Ï¿³¦w¨½	³¯±ÒªF	»O¥_¥«¤å¤s°Ï¿³¦w¨½³¯±ÒªF	2	1	1958	¤¤°ê°ê¥ÁÄÒ	1	0	2070	0.5686	1	1	3	KMT	0	0.32489	0.47808396	2.091682808	»O¥_¥«¤å¤s°Ï¿³¦w¨½
»O¥_¥«¤å¤s°Ï¿³¦w¨½	Âö³¯¥É¬Ã	»O¥_¥«¤å¤s°Ï¿³¦w¨½Âö³¯¥É¬Ã	3	0	1947	µLÄÒÄy¤Î¥¼¸g¬FÄÒ±ÀÂË	0	0	1425	0.3914	0	0	3	KMT	0	0.47808396	0.47808396	2.091682808	»O¥_¥«¤å¤s°Ï¿³¦w¨½
»O¥_¥«¤å¤s°Ï¿³ºÖ¨½	³\»Ê¨}	»O¥_¥«¤å¤s°Ï¿³ºÖ¨½³\»Ê¨}	1	1	1964	µLÄÒÄy¤Î¥¼¸g¬FÄÒ±ÀÂË	0	0	2201	0.6515	1	1	2	KMT	0	0.42445225	0.54583481	1.832056112	»O¥_¥«¤å¤s°Ï¿³ºÖ¨½
»O¥_¥«¤å¤s°Ï¿³ºÖ¨½	³¯¨q­^	»O¥_¥«¤å¤s°Ï¿³ºÖ¨½³¯¨q­^	2	0	1955	µLÄÒÄy¤Î¥¼¸g¬FÄÒ±ÀÂË	0	0	1177	0.3484	0	0	2	KMT	0	0.54583481	0.54583481	1.832056112	»O¥_¥«¤å¤s°Ï¿³ºÖ¨½
»O¥_¥«¤å¤s°Ï¿³©ô¨½	Ä¬ÄnÄ³	»O¥_¥«¤å¤s°Ï¿³©ô¨½Ä¬ÄnÄ³	1	1	1964	¤¤°ê°ê¥ÁÄÒ	1	0	3838	1	1	1	1	KMT	0	1	1	1	»O¥_¥«¤å¤s°Ï¿³©ô¨½
»O¥_¥«¤å¤s°Ï¿³®õ¨½	ÁéÄ¶¼Ö	»O¥_¥«¤å¤s°Ï¿³®õ¨½ÁéÄ¶¼Ö	1	1	1959	¤¤°ê°ê¥ÁÄÒ	1	0	1319	0.6289	1	1	2	KMT	0	0.39551521	0.53315621	1.875622906	»O¥_¥«¤å¤s°Ï¿³®õ¨½
»O¥_¥«¤å¤s°Ï¿³®õ¨½	¶À¯]¶©	»O¥_¥«¤å¤s°Ï¿³®õ¨½¶À¯]¶©	2	1	1958	µLÄÒÄy¤Î¥¼¸g¬FÄÒ±ÀÂË	0	0	778	0.371	0	0	2	KMT	0	0.53315621	0.53315621	1.875622906	»O¥_¥«¤å¤s°Ï¿³®õ¨½
»O¥_¥«¤å¤s°Ï¿³©÷¨½	§d¿Ä©þ	»O¥_¥«¤å¤s°Ï¿³©÷¨½§d¿Ä©þ	1	1	1959	¤¤°ê°ê¥ÁÄÒ	1	0	2013	0.5681	1	1	2	KMT	0	0.32273761	0.50918885	1.96390789	»O¥_¥«¤å¤s°Ï¿³©÷¨½
»O¥_¥«¤å¤s°Ï¿³©÷¨½	±i¤p­b	»O¥_¥«¤å¤s°Ï¿³©÷¨½±i¤p­b	2	0	1958	µLÄÒÄy¤Î¥¼¸g¬FÄÒ±ÀÂË	0	0	1530	0.4318	0	0	2	KMT	0	0.50918885	0.50918885	1.96390789	»O¥_¥«¤å¤s°Ï¿³©÷¨½
»O¥_¥«¤å¤s°Ï¸Õ°|¨½	ªL¶i¿³	»O¥_¥«¤å¤s°Ï¸Õ°|¨½ªL¶i¿³	1	1	1955	µLÄÒÄy¤Î¥¼¸g¬FÄÒ±ÀÂË	0	0	1353	0.353	0	0	3	KMT	0	0.124609	0.41997964	2.381067806	»O¥_¥«¤å¤s°Ï¸Õ°|¨½
»O¥_¥«¤å¤s°Ï¸Õ°|¨½	³¯¼yÅ±	»O¥_¥«¤å¤s°Ï¸Õ°|¨½³¯¼yÅ±	2	1	1954	µLÄÒÄy¤Î¥¼¸g¬FÄÒ±ÀÂË	0	0	444	0.1158	0	0	3	KMT	0	0.13801864	0.41997964	2.381067806	»O¥_¥«¤å¤s°Ï¸Õ°|¨½
»O¥_¥«¤å¤s°Ï¸Õ°|¨½	Ä¬¤åµo	»O¥_¥«¤å¤s°Ï¸Õ°|¨½Ä¬¤åµo	3	1	1959	¤¤°ê°ê¥ÁÄÒ	1	0	2035	0.531	1	1	3	KMT	0	0.41997964	0.41997964	2.381067806	»O¥_¥«¤å¤s°Ï¸Õ°|¨½
»O¥_¥«¤å¤s°ÏµØ¿³¨½	ªL?¦À	»O¥_¥«¤å¤s°ÏµØ¿³¨½ªL?¦À	1	1	1957	¤¤°ê°ê¥ÁÄÒ	1	0	1799	0.3958	1	0	4	KMT	0	0.15665764	0.28917143	3.458156292	»O¥_¥«¤å¤s°ÏµØ¿³¨½
»O¥_¥«¤å¤s°ÏµØ¿³¨½	©P¥ß½d	»O¥_¥«¤å¤s°ÏµØ¿³¨½©P¥ß½d	2	1	1958	µLÄÒÄy¤Î¥¼¸g¬FÄÒ±ÀÂË	0	0	1035	0.2277	0	0	4	KMT	0	0.20850493	0.28917143	3.458156292	»O¥_¥«¤å¤s°ÏµØ¿³¨½
»O¥_¥«¤å¤s°ÏµØ¿³¨½	©P¼wÙy	»O¥_¥«¤å¤s°ÏµØ¿³¨½©P¼wÙy	3	1	1965	¤¤°ê°ê¥ÁÄÒ	1	0	1174	0.2583	0	1	4	KMT	0	0.27522382	0.28917143	3.458156292	»O¥_¥«¤å¤s°ÏµØ¿³¨½
»O¥_¥«¤å¤s°ÏµØ¿³¨½	¸­ªüªQ	»O¥_¥«¤å¤s°ÏµØ¿³¨½¸­ªüªQ	4	1	1972	µLÄÒÄy¤Î¥¼¸g¬FÄÒ±ÀÂË	0	0	537	0.1181	0	0	4	KMT	0	0.28917143	0.28917143	3.458156292	»O¥_¥«¤å¤s°ÏµØ¿³¨½
»O¥_¥«¤å¤s°Ï©ú¸q¨½	°ª¼w¥|	»O¥_¥«¤å¤s°Ï©ú¸q¨½°ª¼w¥|	1	1	1944	¤¤°ê°ê¥ÁÄÒ	1	0	1130	0.5028	1	1	4	KMT	0	0.25280784	0.35176669	2.84279333	»O¥_¥«¤å¤s°Ï©ú¸q¨½
»O¥_¥«¤å¤s°Ï©ú¸q¨½	¼B¯Â¨¶	»O¥_¥«¤å¤s°Ï©ú¸q¨½¼B¯Â¨¶	2	0	1967	µLÄÒÄy¤Î¥¼¸g¬FÄÒ±ÀÂË	0	0	454	0.202	0	0	4	KMT	0	0.29361184	0.35176669	2.84279333	»O¥_¥«¤å¤s°Ï©ú¸q¨½
»O¥_¥«¤å¤s°Ï©ú¸q¨½	ÁÂ©[§ø	»O¥_¥«¤å¤s°Ï©ú¸q¨½ÁÂ©[§ø	3	1	1980	µLÄÒÄy¤Î¥¼¸g¬FÄÒ±ÀÂË	0	0	139	0.0618	0	0	4	KMT	0	0.29743108	0.35176669	2.84279333	»O¥_¥«¤å¤s°Ï©ú¸q¨½
»O¥_¥«¤å¤s°Ï©ú¸q¨½	­J¤@»ï	»O¥_¥«¤å¤s°Ï©ú¸q¨½­J¤@»ï	4	1	1960	µLÄÒÄy¤Î¥¼¸g¬FÄÒ±ÀÂË	0	0	524	0.2331	0	0	4	KMT	0	0.35176669	0.35176669	2.84279333	»O¥_¥«¤å¤s°Ï©ú¸q¨½
»O¥_¥«¤å¤s°Ï©ú¿³¨½	ªL«Tºa	»O¥_¥«¤å¤s°Ï©ú¿³¨½ªL«Tºa	1	1	1949	¤¤°ê°ê¥ÁÄÒ	1	0	1587	0.4146	0	1	2	KMT	0	0.17189316	0.51446925	1.943750768	»O¥_¥«¤å¤s°Ï©ú¿³¨½
»O¥_¥«¤å¤s°Ï©ú¿³¨½	äk°·¥Á	»O¥_¥«¤å¤s°Ï©ú¿³¨½äk°·¥Á	2	1	1960	µLÄÒÄy¤Î¥¼¸g¬FÄÒ±ÀÂË	0	0	2240	0.5853	1	0	2	KMT	0	0.51446925	0.51446925	1.943750768	»O¥_¥«¤å¤s°Ï©ú¿³¨½
»O¥_¥«¤å¤s°Ï¤ì¬]¨½	¶À¯ª¶¯	»O¥_¥«¤å¤s°Ï¤ì¬]¨½¶À¯ª¶¯	1	1	1957	µLÄÒÄy¤Î¥¼¸g¬FÄÒ±ÀÂË	0	0	1927	0.4153	0	0	2	KMT	0	0.17247409	0.51423125	1.944650388	»O¥_¥«¤å¤s°Ï¤ì¬]¨½
»O¥_¥«¤å¤s°Ï¤ì¬]¨½	°ª»Ê¶Ç	»O¥_¥«¤å¤s°Ï¤ì¬]¨½°ª»Ê¶Ç	2	1	1956	¤¤°ê°ê¥ÁÄÒ	1	0	2713	0.5846	1	1	2	KMT	0	0.51423125	0.51423125	1.944650388	»O¥_¥«¤å¤s°Ï¤ì¬]¨½
»O¥_¥«¤å¤s°Ï¤ì·s¨½	¾G©ú³q	»O¥_¥«¤å¤s°Ï¤ì·s¨½¾G©ú³q	1	1	1956	¤¤°ê°ê¥ÁÄÒ	1	0	4095	1	1	1	1	KMT	0	1	1	1	»O¥_¥«¤å¤s°Ï¤ì·s¨½
»O¥_¥«¤å¤s°Ï¶¶¿³¨½	°ª¥Éµ^	»O¥_¥«¤å¤s°Ï¶¶¿³¨½°ª¥Éµ^	1	0	1955	¤¤°ê°ê¥ÁÄÒ	1	0	2501	0.6235	1	1	2	KMT	0	0.38875225	0.53042921	1.885265708	»O¥_¥«¤å¤s°Ï¶¶¿³¨½
»O¥_¥«¤å¤s°Ï¶¶¿³¨½	³æ³s«°	»O¥_¥«¤å¤s°Ï¶¶¿³¨½³æ³s«°	2	1	1954	µLÄÒÄy¤Î¥¼¸g¬FÄÒ±ÀÂË	0	0	1510	0.3764	0	0	2	KMT	0	0.53042921	0.53042921	1.885265708	»O¥_¥«¤å¤s°Ï¶¶¿³¨½
»O¥_¥«¤å¤s°Ï©¾¶¶¨½	´¿¹çºY	»O¥_¥«¤å¤s°Ï©¾¶¶¨½´¿¹çºY	1	0	1958	¤¤°ê°ê¥ÁÄÒ	1	0	1958	1	1	1	1	KMT	0	1	1	1	»O¥_¥«¤å¤s°Ï©¾¶¶¨½
»O¥_¥«¤å¤s°Ï¼ÌªL¨½	¾G«ØÍQ	»O¥_¥«¤å¤s°Ï¼ÌªL¨½¾G«ØÍQ	1	1	1975	¤¤°ê°ê¥ÁÄÒ	1	0	1229	0.2633	0	1	4	KMT	0	0.06932689	0.27672489	3.613697344	»O¥_¥«¤å¤s°Ï¼ÌªL¨½
»O¥_¥«¤å¤s°Ï¼ÌªL¨½	ªô¨q¬Â	»O¥_¥«¤å¤s°Ï¼ÌªL¨½ªô¨q¬Â	2	0	1949	µLÄÒÄy¤Î¥¼¸g¬FÄÒ±ÀÂË	0	0	621	0.133	0	0	4	KMT	0	0.08701589	0.27672489	3.613697344	»O¥_¥«¤å¤s°Ï¼ÌªL¨½
»O¥_¥«¤å¤s°Ï¼ÌªL¨½	³¯«T§»	»O¥_¥«¤å¤s°Ï¼ÌªL¨½³¯«T§»	3	1	1975	µLÄÒÄy¤Î¥¼¸g¬FÄÒ±ÀÂË	0	0	1697	0.3636	1	0	4	KMT	0	0.21922085	0.27672489	3.613697344	»O¥_¥«¤å¤s°Ï¼ÌªL¨½
»O¥_¥«¤å¤s°Ï¼ÌªL¨½	¾G¥É¯]	»O¥_¥«¤å¤s°Ï¼ÌªL¨½¾G¥É¯]	4	0	1953	µLÄÒÄy¤Î¥¼¸g¬FÄÒ±ÀÂË	0	0	1119	0.2398	0	0	4	KMT	0	0.27672489	0.27672489	3.613697344	»O¥_¥«¤å¤s°Ï¼ÌªL¨½
»O¥_¥«¤å¤s°Ï¼Ì·s¨½	³¯¤å¥Í	»O¥_¥«¤å¤s°Ï¼Ì·s¨½³¯¤å¥Í	1	1	1953	µLÄÒÄy¤Î¥¼¸g¬FÄÒ±ÀÂË	0	0	1632	0.5577	1	1	2	KMT	0	0.31102929	0.50657013	1.974060334	»O¥_¥«¤å¤s°Ï¼Ì·s¨½
»O¥_¥«¤å¤s°Ï¼Ì·s¨½	¼Ú¶§¥Ý­^	»O¥_¥«¤å¤s°Ï¼Ì·s¨½¼Ú¶§¥Ý­^	2	0	1957	¤¤°ê°ê¥ÁÄÒ	1	0	1294	0.4422	0	0	2	KMT	0	0.50657013	0.50657013	1.974060334	»O¥_¥«¤å¤s°Ï¼Ì·s¨½
»O¥_¥«¤å¤s°Ï¼Ì¤å¨½	°ª»Ê§ø	»O¥_¥«¤å¤s°Ï¼Ì¤å¨½°ª»Ê§ø	1	1	1967	¤¤°ê°ê¥ÁÄÒ	1	0	707	0.2009	0	0	4	KMT	0	0.04036081	0.2980371	3.355286976	»O¥_¥«¤å¤s°Ï¼Ì¤å¨½
»O¥_¥«¤å¤s°Ï¼Ì¤å¨½	ªL²Q¯]	»O¥_¥«¤å¤s°Ï¼Ì¤å¨½ªL²Q¯]	2	0	1965	¤¤°ê°ê¥ÁÄÒ	1	0	1535	0.4363	1	0	4	KMT	0	0.2307185	0.2980371	3.355286976	»O¥_¥«¤å¤s°Ï¼Ì¤å¨½
»O¥_¥«¤å¤s°Ï¼Ì¤å¨½	©P®]½¼	»O¥_¥«¤å¤s°Ï¼Ì¤å¨½©P®]½¼	3	1	1948	µLÄÒÄy¤Î¥¼¸g¬FÄÒ±ÀÂË	0	0	539	0.1532	0	0	4	KMT	0	0.25418874	0.2980371	3.355286976	»O¥_¥«¤å¤s°Ï¼Ì¤å¨½
»O¥_¥«¤å¤s°Ï¼Ì¤å¨½	¼B¯Àµ^	»O¥_¥«¤å¤s°Ï¼Ì¤å¨½¼B¯Àµ^	4	0	1957	¤¤°ê°ê¥ÁÄÒ	1	0	737	0.2094	0	0	4	KMT	0	0.2980371	0.2980371	3.355286976	»O¥_¥«¤å¤s°Ï¼Ì¤å¨½
»O¥_¥«¤å¤s°Ï¼Ì¸}¨½	°ªªL¥É¼b	»O¥_¥«¤å¤s°Ï¼Ì¸}¨½°ªªL¥É¼b	1	0	1955	¤¤°ê°ê¥ÁÄÒ	1	0	1705	0.5865	1	0	2	KMT	0	0.34398225	0.51488181	1.942193297	»O¥_¥«¤å¤s°Ï¼Ì¸}¨½
»O¥_¥«¤å¤s°Ï¼Ì¸}¨½	°ª¤¯©M	»O¥_¥«¤å¤s°Ï¼Ì¸}¨½°ª¤¯©M	2	1	1967	µLÄÒÄy¤Î¥¼¸g¬FÄÒ±ÀÂË	0	0	1202	0.4134	0	0	2	KMT	0	0.51488181	0.51488181	1.942193297	»O¥_¥«¤å¤s°Ï¼Ì¸}¨½
»O¥_¥«¤å¤s°Ï¼Ì¾ð¨½	²ø¾Ç´¼	»O¥_¥«¤å¤s°Ï¼Ì¾ð¨½²ø¾Ç´¼	1	1	1976	¤¤°ê°ê¥ÁÄÒ	1	0	544	0.2106	0	0	3	KMT	0	0.04435236	0.35617966	2.807571887	»O¥_¥«¤å¤s°Ï¼Ì¾ð¨½
»O¥_¥«¤å¤s°Ï¼Ì¾ð¨½	½²¯À±ö	»O¥_¥«¤å¤s°Ï¼Ì¾ð¨½½²¯À±ö	2	0	1953	¤¤°ê°ê¥ÁÄÒ	1	0	982	0.3803	0	0	3	KMT	0	0.18898045	0.35617966	2.807571887	»O¥_¥«¤å¤s°Ï¼Ì¾ð¨½
»O¥_¥«¤å¤s°Ï¼Ì¾ð¨½	³¯¦A¬³	»O¥_¥«¤å¤s°Ï¼Ì¾ð¨½³¯¦A¬³	3	1	1960	¤¤°ê°ê¥ÁÄÒ	1	0	1056	0.4089	1	0	3	KMT	0	0.35617966	0.35617966	2.807571887	»O¥_¥«¤å¤s°Ï¼Ì¾ð¨½
»O¥_¥«¤å¤s°Ï¸UªÚ¨½	³¯«º¨q	»O¥_¥«¤å¤s°Ï¸UªÚ¨½³¯«º¨q	1	0	1963	µLÄÒÄy¤Î¥¼¸g¬FÄÒ±ÀÂË	0	0	2274	0.5382	1	0	2	KMT	0	0.28965924	0.50282613	1.988759017	»O¥_¥«¤å¤s°Ï¸UªÚ¨½
»O¥_¥«¤å¤s°Ï¸UªÚ¨½	ªL©ú³q	»O¥_¥«¤å¤s°Ï¸UªÚ¨½ªL©ú³q	2	1	1953	¤¤°ê°ê¥ÁÄÒ	1	0	1951	0.4617	0	0	2	KMT	0	0.50282613	0.50282613	1.988759017	»O¥_¥«¤å¤s°Ï¸UªÚ¨½
»O¥_¥«¤å¤s°Ï¸U¬ü¨½	¤×²±¥Ð	»O¥_¥«¤å¤s°Ï¸U¬ü¨½¤×²±¥Ð	1	1	1952	¤¤°ê°ê¥ÁÄÒ	1	0	3189	1	1	1	1	KMT	0	1	1	1	»O¥_¥«¤å¤s°Ï¸U¬ü¨½
»O¥_¥«¤å¤s°Ï³Õ¹Å¨½	±i§®¤å	»O¥_¥«¤å¤s°Ï³Õ¹Å¨½±i§®¤å	1	0	1961	¤¤°ê°ê¥ÁÄÒ	1	0	1746	0.5855	1	1	3	KMT	0	0.34281025	0.47379401	2.110621871	»O¥_¥«¤å¤s°Ï³Õ¹Å¨½
»O¥_¥«¤å¤s°Ï³Õ¹Å¨½	³\¥¿¸U	»O¥_¥«¤å¤s°Ï³Õ¹Å¨½³\¥¿¸U	2	1	1976	µLÄÒÄy¤Î¥¼¸g¬FÄÒ±ÀÂË	0	0	170	0.057	0	0	3	KMT	0	0.34605925	0.47379401	2.110621871	»O¥_¥«¤å¤s°Ï³Õ¹Å¨½
»O¥_¥«¤å¤s°Ï³Õ¹Å¨½	³¯¼s©÷	»O¥_¥«¤å¤s°Ï³Õ¹Å¨½³¯¼s©÷	3	1	1958	µLÄÒÄy¤Î¥¼¸g¬FÄÒ±ÀÂË	0	0	1066	0.3574	0	0	3	KMT	0	0.47379401	0.47379401	2.110621871	»O¥_¥«¤å¤s°Ï³Õ¹Å¨½
»O¥_¥«¤å¤s°Ï¸U¿³¨½	ÁÂ??	»O¥_¥«¤å¤s°Ï¸U¿³¨½ÁÂ??	1	1	1957	¤¤°ê°ê¥ÁÄÒ	1	0	3399	1	1	1	1	KMT	0	1	1	1	»O¥_¥«¤å¤s°Ï¸U¿³¨½
»O¥_¥«¤å¤s°Ï¬F¤j¨½	§d­x´ï	»O¥_¥«¤å¤s°Ï¬F¤j¨½§d­x´ï	1	1	1960	¤¤°ê°ê¥ÁÄÒ	1	0	1017	0.3455	0	0	3	KMT	0	0.11937025	0.39785865	2.51345547	»O¥_¥«¤å¤s°Ï¬F¤j¨½
»O¥_¥«¤å¤s°Ï¬F¤j¨½	¶À¥¿¥þ	»O¥_¥«¤å¤s°Ï¬F¤j¨½¶À¥¿¥þ	2	1	1960	µLÄÒÄy¤Î¥¼¸g¬FÄÒ±ÀÂË	0	0	435	0.1478	0	0	3	KMT	0	0.14121509	0.39785865	2.51345547	»O¥_¥«¤å¤s°Ï¬F¤j¨½
»O¥_¥«¤å¤s°Ï¬F¤j¨½	¤ý¼w½@	»O¥_¥«¤å¤s°Ï¬F¤j¨½¤ý¼w½@	3	0	1967	µLÄÒÄy¤Î¥¼¸g¬FÄÒ±ÀÂË	0	0	1491	0.5066	1	0	3	KMT	0	0.39785865	0.39785865	2.51345547	»O¥_¥«¤å¤s°Ï¬F¤j¨½
»O¥_¥«¤å¤s°Ï«ü«n¨½	±iµÎµ{	»O¥_¥«¤å¤s°Ï«ü«n¨½±iµÎµ{	1	1	1970	¥Á¥D¶i¨BÄÒ	0	1	862	0.4746	0	1	2	KMT	0	0.22524516	0.50118525	1.995270212	»O¥_¥«¤å¤s°Ï«ü«n¨½
»O¥_¥«¤å¤s°Ï«ü«n¨½	±i¨Î«n	»O¥_¥«¤å¤s°Ï«ü«n¨½±i¨Î«n	2	0	1970	¤¤°ê°ê¥ÁÄÒ	1	0	954	0.5253	1	0	2	KMT	0	0.50118525	0.50118525	1.995270212	»O¥_¥«¤å¤s°Ï«ü«n¨½
»O¥_¥«¤å¤s°Ï¦Ñ¬u¨½	°ª¶i¨Ó	»O¥_¥«¤å¤s°Ï¦Ñ¬u¨½°ª¶i¨Ó	1	1	1946	µLÄÒÄy¤Î¥¼¸g¬FÄÒ±ÀÂË	0	0	481	1	1	1	1	KMT	0	1	1	1	»O¥_¥«¤å¤s°Ï¦Ñ¬u¨½
·s¥_¥«¥Ûªù°Ï¼w­Z¨½	¨H¯À±ö	·s¥_¥«¥Ûªù°Ï¼w­Z¨½¨H¯À±ö	1	0	1959	µLÄÒÄy¤Î¥¼¸g¬FÄÒ±ÀÂË	0	0	324	0.3652	0	0	2	KMT	1	0.13337104	0.53621513	1.864923133	·s¥_¥«¥Ûªù°Ï¼w­Z¨½
·s¥_¥«¥Ûªù°Ï¼w­Z¨½	ªá¤åµo	·s¥_¥«¥Ûªù°Ï¼w­Z¨½ªá¤åµo	2	1	1954	µLÄÒÄy¤Î¥¼¸g¬FÄÒ±ÀÂË	0	0	563	0.6347	1	0	2	KMT	1	0.53621513	0.53621513	1.864923133	·s¥_¥«¥Ûªù°Ï¼w­Z¨½
·s¥_¥«¥Ûªù°Ï´I°ò¨½	ªL­Z´Ë	·s¥_¥«¥Ûªù°Ï´I°ò¨½ªL­Z´Ë	1	1	1948	µLÄÒÄy¤Î¥¼¸g¬FÄÒ±ÀÂË	0	0	586	0.5955	1	0	2	KMT	1	0.35462025	0.51815961	1.929907273	·s¥_¥«¥Ûªù°Ï´I°ò¨½
·s¥_¥«¥Ûªù°Ï´I°ò¨½	¦¿²K´I	·s¥_¥«¥Ûªù°Ï´I°ò¨½¦¿²K´I	2	1	1953	µLÄÒÄy¤Î¥¼¸g¬FÄÒ±ÀÂË	0	0	398	0.4044	0	0	2	KMT	1	0.51815961	0.51815961	1.929907273	·s¥_¥«¥Ûªù°Ï´I°ò¨½
·s¥_¥«¥Ûªù°Ï¦Ñ±ö¨½	¾G©°¥Ó	·s¥_¥«¥Ûªù°Ï¦Ñ±ö¨½¾G©°¥Ó	1	1	1947	µLÄÒÄy¤Î¥¼¸g¬FÄÒ±ÀÂË	0	0	524	0.3724	0	0	2	KMT	1	0.13868176	0.53243801	1.878152914	·s¥_¥«¥Ûªù°Ï¦Ñ±ö¨½
·s¥_¥«¥Ûªù°Ï¦Ñ±ö¨½	³\Ä_¸S	·s¥_¥«¥Ûªù°Ï¦Ñ±ö¨½³\Ä_¸S	2	1	1947	¤¤°ê°ê¥ÁÄÒ	1	0	883	0.6275	1	0	2	KMT	1	0.53243801	0.53243801	1.878152914	·s¥_¥«¥Ûªù°Ï¦Ñ±ö¨½
·s¥_¥«¥Ûªù°Ï¤s·Ë¨½	³\ªü·×	·s¥_¥«¥Ûªù°Ï¤s·Ë¨½³\ªü·×	1	1	1943	µLÄÒÄy¤Î¥¼¸g¬FÄÒ±ÀÂË	0	0	512	1	1	0	1	KMT	1	1	1	1	·s¥_¥«¥Ûªù°Ï¤s·Ë¨½
·s¥_¥«¥Ûªù°Ï¥Ûªù¨½	¬I©v«n	·s¥_¥«¥Ûªù°Ï¥Ûªù¨½¬I©v«n	1	1	1961	µLÄÒÄy¤Î¥¼¸g¬FÄÒ±ÀÂË	0	0	511	0.4645	0	0	2	KMT	1	0.21576025	0.50241341	1.990392733	·s¥_¥«¥Ûªù°Ï¥Ûªù¨½
·s¥_¥«¥Ûªù°Ï¥Ûªù¨½	¼B±Ò²»	·s¥_¥«¥Ûªù°Ï¥Ûªù¨½¼B±Ò²»	2	1	1967	µLÄÒÄy¤Î¥¼¸g¬FÄÒ±ÀÂË	0	0	589	0.5354	1	0	2	KMT	1	0.50241341	0.50241341	1.990392733	·s¥_¥«¥Ûªù°Ï¥Ûªù¨½
·s¥_¥«¥Ûªù°Ï¦y³À¨½	§fª÷¾ð	·s¥_¥«¥Ûªù°Ï¦y³À¨½§fª÷¾ð	1	1	1955	¤¤°ê°ê¥ÁÄÒ	1	0	851	1	1	0	1	KMT	1	1	1	1	·s¥_¥«¥Ûªù°Ï¦y³À¨½
·s¥_¥«¥Ûªù°Ï°®µØ¨½	´¿²MªQ	·s¥_¥«¥Ûªù°Ï°®µØ¨½´¿²MªQ	1	1	1950	µLÄÒÄy¤Î¥¼¸g¬FÄÒ±ÀÂË	0	0	200	1	1	0	1	KMT	1	1	1	1	·s¥_¥«¥Ûªù°Ï°®µØ¨½
·s¥_¥«¥Ûªù°Ï­ZªL¨½	½m·ç©ô	·s¥_¥«¥Ûªù°Ï­ZªL¨½½m·ç©ô	1	1	1948	µLÄÒÄy¤Î¥¼¸g¬FÄÒ±ÀÂË	0	0	199	0.3871	0	0	3	KMT	1	0.14984641	0.39551718	2.528335179	·s¥_¥«¥Ûªù°Ï­ZªL¨½
·s¥_¥«¥Ûªù°Ï­ZªL¨½	¼ï²M¤s	·s¥_¥«¥Ûªù°Ï­ZªL¨½¼ï²M¤s	2	1	1956	¤¤°ê°ê¥ÁÄÒ	1	0	245	0.4766	1	0	3	KMT	1	0.37699397	0.39551718	2.528335179	·s¥_¥«¥Ûªù°Ï­ZªL¨½
·s¥_¥«¥Ûªù°Ï­ZªL¨½	ªL±m­i	·s¥_¥«¥Ûªù°Ï­ZªL¨½ªL±m­i	3	0	1971	µLÄÒÄy¤Î¥¼¸g¬FÄÒ±ÀÂË	0	0	70	0.1361	0	0	3	KMT	1	0.39551718	0.39551718	2.528335179	·s¥_¥«¥Ûªù°Ï­ZªL¨½
·s¥_¥«¥Ûªù°Ï¯ó¨½¨½	§õª÷Ä_	·s¥_¥«¥Ûªù°Ï¯ó¨½¨½§õª÷Ä_	1	1	1953	¤¤°ê°ê¥ÁÄÒ	1	0	424	0.5848	1	0	2	KMT	1	0.34199104	0.51429905	1.944394025	·s¥_¥«¥Ûªù°Ï¯ó¨½¨½
·s¥_¥«¥Ûªù°Ï¯ó¨½¨½	¦¿¥¿©¾	·s¥_¥«¥Ûªù°Ï¯ó¨½¨½¦¿¥¿©¾	2	1	1959	µLÄÒÄy¤Î¥¼¸g¬FÄÒ±ÀÂË	0	0	301	0.4151	0	0	2	KMT	1	0.51429905	0.51429905	1.944394025	·s¥_¥«¥Ûªù°Ï¯ó¨½¨½
·s¥_¥«¤TªÛ°Ï¤K½å¨½	¬x¼y³¹	·s¥_¥«¤TªÛ°Ï¤K½å¨½¬x¼y³¹	1	1	1954	µLÄÒÄy¤Î¥¼¸g¬FÄÒ±ÀÂË	0	0	134	0.435	0	0	2	KMT	1	0.189225	0.50833701	1.967198886	·s¥_¥«¤TªÛ°Ï¤K½å¨½
·s¥_¥«¤TªÛ°Ï¤K½å¨½	·¨®¶¸Á	·s¥_¥«¤TªÛ°Ï¤K½å¨½·¨®¶¸Á	2	1	1964	µLÄÒÄy¤Î¥¼¸g¬FÄÒ±ÀÂË	0	0	174	0.5649	1	0	2	KMT	1	0.50833701	0.50833701	1.967198886	·s¥_¥«¤TªÛ°Ï¤K½å¨½
·s¥_¥«¤TªÛ°Ï®HÀY¨½	Â²ÀA¶©	·s¥_¥«¤TªÛ°Ï®HÀY¨½Â²ÀA¶©	1	1	1949	µLÄÒÄy¤Î¥¼¸g¬FÄÒ±ÀÂË	0	0	2267	1	1	0	1	KMT	1	1	1	1	·s¥_¥«¤TªÛ°Ï®HÀY¨½
·s¥_¥«¤TªÛ°Ï¥jÉÜ¨½	ÄÁ¸U	·s¥_¥«¤TªÛ°Ï¥jÉÜ¨½ÄÁ¸U	1	1	1948	µLÄÒÄy¤Î¥¼¸g¬FÄÒ±ÀÂË	0	0	336	0.4786	0	0	2	KMT	1	0.22905796	0.50081165	1.996758662	·s¥_¥«¤TªÛ°Ï¥jÉÜ¨½
·s¥_¥«¤TªÛ°Ï¥jÉÜ¨½	¸­¾ðªK	·s¥_¥«¤TªÛ°Ï¥jÉÜ¨½¸­¾ðªK	2	1	1939	µLÄÒÄy¤Î¥¼¸g¬FÄÒ±ÀÂË	0	0	366	0.5213	1	0	2	KMT	1	0.50081165	0.50081165	1.996758662	·s¥_¥«¤TªÛ°Ï¥jÉÜ¨½
·s¥_¥«¤TªÛ°Ï·sÉÜ¨½	ªL¤å³¹	·s¥_¥«¤TªÛ°Ï·sÉÜ¨½ªL¤å³¹	1	1	1954	µLÄÒÄy¤Î¥¼¸g¬FÄÒ±ÀÂË	0	0	410	0.696	1	0	2	KMT	1	0.484416	0.57677121	1.733789729	·s¥_¥«¤TªÛ°Ï·sÉÜ¨½
·s¥_¥«¤TªÛ°Ï·sÉÜ¨½	¦¿¼y±R	·s¥_¥«¤TªÛ°Ï·sÉÜ¨½¦¿¼y±R	2	1	1958	¤¤°ê°ê¥ÁÄÒ	1	0	179	0.3039	0	0	2	KMT	1	0.57677121	0.57677121	1.733789729	·s¥_¥«¤TªÛ°Ï·sÉÜ¨½
·s¥_¥«¤TªÛ°Ï®H©W¨½	¿cÀAÄÁ	·s¥_¥«¤TªÛ°Ï®H©W¨½¿cÀAÄÁ	1	1	1949	µLÄÒÄy¤Î¥¼¸g¬FÄÒ±ÀÂË	0	0	1656	0.4639	0	0	2	KMT	1	0.21520321	0.50249921	1.99005288	·s¥_¥«¤TªÛ°Ï®H©W¨½
·s¥_¥«¤TªÛ°Ï®H©W¨½	´¿¥É¬Ã	·s¥_¥«¤TªÛ°Ï®H©W¨½´¿¥É¬Ã	2	0	1956	¤¤°ê°ê¥ÁÄÒ	1	0	1913	0.536	1	0	2	KMT	1	0.50249921	0.50249921	1.99005288	·s¥_¥«¤TªÛ°Ï®H©W¨½
·s¥_¥«¤TªÛ°Ï­Zªø¨½	ªLÂù³ß	·s¥_¥«¤TªÛ°Ï­Zªø¨½ªLÂù³ß	1	1	1957	¤¤°ê°ê¥ÁÄÒ	1	0	197	0.5	1	0	3	KMT	1	0.25	0.37696613	2.65275822	·s¥_¥«¤TªÛ°Ï­Zªø¨½
·s¥_¥«¤TªÛ°Ï­Zªø¨½	§õ²M¬u	·s¥_¥«¤TªÛ°Ï­Zªø¨½§õ²M¬u	2	1	1952	µLÄÒÄy¤Î¥¼¸g¬FÄÒ±ÀÂË	0	0	111	0.2817	0	0	3	KMT	1	0.32935489	0.37696613	2.65275822	·s¥_¥«¤TªÛ°Ï­Zªø¨½
·s¥_¥«¤TªÛ°Ï­Zªø¨½	ªL¶i¿³	·s¥_¥«¤TªÛ°Ï­Zªø¨½ªL¶i¿³	3	1	1971	¤¤°ê°ê¥ÁÄÒ	1	0	86	0.2182	0	0	3	KMT	1	0.37696613	0.37696613	2.65275822	·s¥_¥«¤TªÛ°Ï­Zªø¨½
·s¥_¥«¤TªÛ°Ï¾î¤s¨½	·¨¤å¥Û	·s¥_¥«¤TªÛ°Ï¾î¤s¨½·¨¤å¥Û	1	1	1928	¤¤°ê°ê¥ÁÄÒ	1	0	26	0.0582	0	0	3	KMT	1	0.00338724	0.47602294	2.100739095	·s¥_¥«¤TªÛ°Ï¾î¤s¨½
·s¥_¥«¤TªÛ°Ï¾î¤s¨½	§E¸U±o	·s¥_¥«¤TªÛ°Ï¾î¤s¨½§E¸U±o	2	1	1962	µLÄÒÄy¤Î¥¼¸g¬FÄÒ±ÀÂË	0	0	156	0.3497	0	0	3	KMT	1	0.12567733	0.47602294	2.100739095	·s¥_¥«¤TªÛ°Ï¾î¤s¨½
·s¥_¥«¤TªÛ°Ï¾î¤s¨½	¦¿¾Ë©ú	·s¥_¥«¤TªÛ°Ï¾î¤s¨½¦¿¾Ë©ú	3	1	1962	µLÄÒÄy¤Î¥¼¸g¬FÄÒ±ÀÂË	0	0	264	0.5919	1	0	3	KMT	1	0.47602294	0.47602294	2.100739095	·s¥_¥«¤TªÛ°Ï¾î¤s¨½
·s¥_¥«¤TªÛ°Ï¿üªO¨½	³¯¿P°ê	·s¥_¥«¤TªÛ°Ï¿üªO¨½³¯¿P°ê	1	1	1958	µLÄÒÄy¤Î¥¼¸g¬FÄÒ±ÀÂË	0	0	509	1	1	0	1	KMT	1	1	1	1	·s¥_¥«¤TªÛ°Ï¿üªO¨½
·s¥_¥«¤TªÛ°Ï«á­í¨½	·¨¨q«Û	·s¥_¥«¤TªÛ°Ï«á­í¨½·¨¨q«Û	1	1	1940	¤¤°ê°ê¥ÁÄÒ	1	0	958	1	1	0	1	KMT	1	1	1	1	·s¥_¥«¤TªÛ°Ï«á­í¨½
·s¥_¥«¤TªÛ°ÏºÖ¼w¨½	³¢¸U©M	·s¥_¥«¤TªÛ°ÏºÖ¼w¨½³¢¸U©M	1	1	1951	¤¤°ê°ê¥ÁÄÒ	1	0	432	1	1	0	1	KMT	1	1	1	1	·s¥_¥«¤TªÛ°ÏºÖ¼w¨½
·s¥_¥«¤TªÛ°Ï¶ê¤s¨½	¸­ªl§Ó	·s¥_¥«¤TªÛ°Ï¶ê¤s¨½¸­ªl§Ó	1	1	1957	µLÄÒÄy¤Î¥¼¸g¬FÄÒ±ÀÂË	0	0	350	1	1	0	1	KMT	1	1	1	1	·s¥_¥«¤TªÛ°Ï¶ê¤s¨½
·s¥_¥«¤TªÛ°Ï©±¤l¨½	³¯¨Øµ`	·s¥_¥«¤TªÛ°Ï©±¤l¨½³¯¨Øµ`	1	0	1956	µLÄÒÄy¤Î¥¼¸g¬FÄÒ±ÀÂË	0	0	112	0.2592	0	0	2	KMT	1	0.06718464	0.61582113	1.623848146	·s¥_¥«¤TªÛ°Ï©±¤l¨½
·s¥_¥«¤TªÛ°Ï©±¤l¨½	¿c¬F©¾	·s¥_¥«¤TªÛ°Ï©±¤l¨½¿c¬F©¾	2	1	1940	µLÄÒÄy¤Î¥¼¸g¬FÄÒ±ÀÂË	0	0	320	0.7407	1	0	2	KMT	1	0.61582113	0.61582113	1.623848146	·s¥_¥«¤TªÛ°Ï©±¤l¨½
·s¥_¥«¤TªÛ°Ï¿³µØ¨½	§ù°ê°»	·s¥_¥«¤TªÛ°Ï¿³µØ¨½§ù°ê°»	1	1	1956	µLÄÒÄy¤Î¥¼¸g¬FÄÒ±ÀÂË	0	0	510	0.6367	1	0	3	KMT	1	0.40538689	0.50806451	1.968253992	·s¥_¥«¤TªÛ°Ï¿³µØ¨½
·s¥_¥«¤TªÛ°Ï¿³µØ¨½	³¢¤åªN	·s¥_¥«¤TªÛ°Ï¿³µØ¨½³¢¤åªN	2	1	1966	µLÄÒÄy¤Î¥¼¸g¬FÄÒ±ÀÂË	0	0	37	0.0461	0	0	3	KMT	1	0.4075121	0.50806451	1.968253992	·s¥_¥«¤TªÛ°Ï¿³µØ¨½
·s¥_¥«¤TªÛ°Ï¿³µØ¨½	«À¤å¤s	·s¥_¥«¤TªÛ°Ï¿³µØ¨½«À¤å¤s	3	1	1955	µLÄÒÄy¤Î¥¼¸g¬FÄÒ±ÀÂË	0	0	254	0.3171	0	0	3	KMT	1	0.50806451	0.50806451	1.968253992	·s¥_¥«¤TªÛ°Ï¿³µØ¨½
·s¥_¥«²H¤ô°Ï¤¤©M¨½	§õ¥Ã¸R	·s¥_¥«²H¤ô°Ï¤¤©M¨½§õ¥Ã¸R	1	1	1962	µLÄÒÄy¤Î¥¼¸g¬FÄÒ±ÀÂË	0	0	249	0.5608	1	0	2	KMT	1	0.31449664	0.50730545	1.971199008	·s¥_¥«²H¤ô°Ï¤¤©M¨½
·s¥_¥«²H¤ô°Ï¤¤©M¨½	¤ý¤å½÷	·s¥_¥«²H¤ô°Ï¤¤©M¨½¤ý¤å½÷	2	1	1967	µLÄÒÄy¤Î¥¼¸g¬FÄÒ±ÀÂË	0	0	195	0.4391	0	0	2	KMT	1	0.50730545	0.50730545	1.971199008	·s¥_¥«²H¤ô°Ï¤¤©M¨½
·s¥_¥«²H¤ô°Ï¤Ù¤s¨½	§õ¥Ã²M	·s¥_¥«²H¤ô°Ï¤Ù¤s¨½§õ¥Ã²M	1	1	1958	¤¤°ê°ê¥ÁÄÒ	1	0	684	1	1	0	1	KMT	1	1	1	1	·s¥_¥«²H¤ô°Ï¤Ù¤s¨½
·s¥_¥«²H¤ô°Ï½å§µ¨½	¸­®¶©÷	·s¥_¥«²H¤ô°Ï½å§µ¨½¸­®¶©÷	1	1	1971	µLÄÒÄy¤Î¥¼¸g¬FÄÒ±ÀÂË	0	0	592	0.5441	1	0	2	KMT	1	0.29604481	0.50379845	1.984920756	·s¥_¥«²H¤ô°Ï½å§µ¨½
·s¥_¥«²H¤ô°Ï½å§µ¨½	¶À³Ó¨k	·s¥_¥«²H¤ô°Ï½å§µ¨½¶À³Ó¨k	2	1	1943	µLÄÒÄy¤Î¥¼¸g¬FÄÒ±ÀÂË	0	0	496	0.4558	0	0	2	KMT	1	0.50379845	0.50379845	1.984920756	·s¥_¥«²H¤ô°Ï½å§µ¨½
·s¥_¥«²H¤ô°Ï¿³¤¯¨½	±i¨}¶¯	·s¥_¥«²H¤ô°Ï¿³¤¯¨½±i¨}¶¯	1	1	1939	¤¤°ê°ê¥ÁÄÒ	1	0	868	1	1	0	1	KMT	1	1	1	1	·s¥_¥«²H¤ô°Ï¿³¤¯¨½
·s¥_¥«²H¤ô°Ï¿»Á¦¨½	¤ý¹Ø³ß	·s¥_¥«²H¤ô°Ï¿»Á¦¨½¤ý¹Ø³ß	1	1	1950	¤¤°ê°ê¥ÁÄÒ	1	0	461	1	1	0	1	KMT	1	1	1	1	·s¥_¥«²H¤ô°Ï¿»Á¦¨½
·s¥_¥«²H¤ô°Ï©¾¤s¨½	¼ï¬±¤B	·s¥_¥«²H¤ô°Ï©¾¤s¨½¼ï¬±¤B	1	1	1946	¤¤°ê°ê¥ÁÄÒ	1	0	470	0.6921	1	0	2	KMT	1	0.47900241	0.57374325	1.742939895	·s¥_¥«²H¤ô°Ï©¾¤s¨½
·s¥_¥«²H¤ô°Ï©¾¤s¨½	§õ²±¿³	·s¥_¥«²H¤ô°Ï©¾¤s¨½§õ²±¿³	2	1	1936	µLÄÒÄy¤Î¥¼¸g¬FÄÒ±ÀÂË	0	0	209	0.3078	0	0	2	KMT	1	0.57374325	0.57374325	1.742939895	·s¥_¥«²H¤ô°Ï©¾¤s¨½
·s¥_¥«²H¤ô°Ï¸q¤s¨½	½²?ºð	·s¥_¥«²H¤ô°Ï¸q¤s¨½½²?ºð	1	0	1970	µLÄÒÄy¤Î¥¼¸g¬FÄÒ±ÀÂË	0	0	527	0.3249	0	0	3	KMT	1	0.10556001	0.40526883	2.467497932	·s¥_¥«²H¤ô°Ï¸q¤s¨½
·s¥_¥«²H¤ô°Ï¸q¤s¨½	°ª¤ìªL	·s¥_¥«²H¤ô°Ï¸q¤s¨½°ª¤ìªL	2	1	1953	µLÄÒÄy¤Î¥¼¸g¬FÄÒ±ÀÂË	0	0	855	0.5271	1	0	3	KMT	1	0.38339442	0.40526883	2.467497932	·s¥_¥«²H¤ô°Ï¸q¤s¨½
·s¥_¥«²H¤ô°Ï¸q¤s¨½	¸­¤ôª÷	·s¥_¥«²H¤ô°Ï¸q¤s¨½¸­¤ôª÷	3	1	1958	µLÄÒÄy¤Î¥¼¸g¬FÄÒ±ÀÂË	0	0	240	0.1479	0	0	3	KMT	1	0.40526883	0.40526883	2.467497932	·s¥_¥«²H¤ô°Ï¸q¤s¨½
·s¥_¥«²H¤ô°Ï¤ô·½¨½	±i§Ó·©	·s¥_¥«²H¤ô°Ï¤ô·½¨½±i§Ó·©	1	1	1970	¥Á¥D¶i¨BÄÒ	0	1	661	0.4728	0	0	2	KMT	1	0.22353984	0.50137425	1.994518067	·s¥_¥«²H¤ô°Ï¤ô·½¨½
·s¥_¥«²H¤ô°Ï¤ô·½¨½	®}ºa¾ð	·s¥_¥«²H¤ô°Ï¤ô·½¨½®}ºa¾ð	2	1	1950	¤¤°ê°ê¥ÁÄÒ	1	0	737	0.5271	1	0	2	KMT	1	0.50137425	0.50137425	1.994518067	·s¥_¥«²H¤ô°Ï¤ô·½¨½
·s¥_¥«²H¤ô°Ï©¾¼d¨½	§õ¥Ã¨å	·s¥_¥«²H¤ô°Ï©¾¼d¨½§õ¥Ã¨å	1	1	1941	¤¤°ê°ê¥ÁÄÒ	1	0	49	0.0563	0	0	3	KMT	1	0.00316969	0.53692842	1.86244565	·s¥_¥«²H¤ô°Ï©¾¼d¨½
·s¥_¥«²H¤ô°Ï©¾¼d¨½	½±¯Õ«n	·s¥_¥«²H¤ô°Ï©¾¼d¨½½±¯Õ«n	2	1	1952	µLÄÒÄy¤Î¥¼¸g¬FÄÒ±ÀÂË	0	0	593	0.6823	1	0	3	KMT	1	0.46870298	0.53692842	1.86244565	·s¥_¥«²H¤ô°Ï©¾¼d¨½
·s¥_¥«²H¤ô°Ï©¾¼d¨½	§õÂíºa	·s¥_¥«²H¤ô°Ï©¾¼d¨½§õÂíºa	3	1	1955	µLÄÒÄy¤Î¥¼¸g¬FÄÒ±ÀÂË	0	0	227	0.2612	0	0	3	KMT	1	0.53692842	0.53692842	1.86244565	·s¥_¥«²H¤ô°Ï©¾¼d¨½
·s¥_¥«²H¤ô°Ï¾ð¿³¨½	³\¬îªÚ	·s¥_¥«²H¤ô°Ï¾ð¿³¨½³\¬îªÚ	1	1	1959	µLÄÒÄy¤Î¥¼¸g¬FÄÒ±ÀÂË	0	0	462	0.6885	1	0	2	KMT	1	0.47403225	0.57100221	1.751306707	·s¥_¥«²H¤ô°Ï¾ð¿³¨½
·s¥_¥«²H¤ô°Ï¾ð¿³¨½	³\¥Ã¦N	·s¥_¥«²H¤ô°Ï¾ð¿³¨½³\¥Ã¦N	2	1	1959	µLÄÒÄy¤Î¥¼¸g¬FÄÒ±ÀÂË	0	0	209	0.3114	0	0	2	KMT	1	0.57100221	0.57100221	1.751306707	·s¥_¥«²H¤ô°Ï¾ð¿³¨½
·s¥_¥«²H¤ô°Ï©W³»¨½	±i¤Ñ½ç	·s¥_¥«²H¤ô°Ï©W³»¨½±i¤Ñ½ç	1	1	1940	¤¤°ê°ê¥ÁÄÒ	1	0	407	0.5081	1	0	2	KMT	1	0.25816561	0.50003285	1.999868609	·s¥_¥«²H¤ô°Ï©W³»¨½
·s¥_¥«²H¤ô°Ï©W³»¨½	³\¦u¥ô	·s¥_¥«²H¤ô°Ï©W³»¨½³\¦u¥ô	2	1	1957	µLÄÒÄy¤Î¥¼¸g¬FÄÒ±ÀÂË	0	0	394	0.4918	0	0	2	KMT	1	0.50003285	0.50003285	1.999868609	·s¥_¥«²H¤ô°Ï©W³»¨½
·s¥_¥«²H¤ô°ÏºÖ¼w¨½	¬ö¿³©ô	·s¥_¥«²H¤ô°ÏºÖ¼w¨½¬ö¿³©ô	1	1	1946	¤¤°ê°ê¥ÁÄÒ	1	0	1441	0.4061	0	0	2	KMT	1	0.16491721	0.51751565	1.932308714	·s¥_¥«²H¤ô°ÏºÖ¼w¨½
·s¥_¥«²H¤ô°ÏºÖ¼w¨½	³¢²M¬u	·s¥_¥«²H¤ô°ÏºÖ¼w¨½³¢²M¬u	2	1	1945	µLÄÒÄy¤Î¥¼¸g¬FÄÒ±ÀÂË	0	0	2107	0.5938	1	0	2	KMT	1	0.51751565	0.51751565	1.932308714	·s¥_¥«²H¤ô°ÏºÖ¼w¨½
·s¥_¥«²H¤ô°Ï¦Ë³ò¨½	³¢²K¯q	·s¥_¥«²H¤ô°Ï¦Ë³ò¨½³¢²K¯q	1	1	1953	µLÄÒÄy¤Î¥¼¸g¬FÄÒ±ÀÂË	0	0	1562	0.4646	1	0	3	KMT	1	0.21585316	0.4281903	2.335410214	·s¥_¥«²H¤ô°Ï¦Ë³ò¨½
·s¥_¥«²H¤ô°Ï¦Ë³ò¨½	¼B¬f¦~	·s¥_¥«²H¤ô°Ï¦Ë³ò¨½¼B¬f¦~	2	1	1949	µLÄÒÄy¤Î¥¼¸g¬FÄÒ±ÀÂË	0	0	275	0.0817	0	0	3	KMT	1	0.22252805	0.4281903	2.335410214	·s¥_¥«²H¤ô°Ï¦Ë³ò¨½
·s¥_¥«²H¤ô°Ï¦Ë³ò¨½	¾G·¨²Q¬Â	·s¥_¥«²H¤ô°Ï¦Ë³ò¨½¾G·¨²Q¬Â	3	0	1955	µLÄÒÄy¤Î¥¼¸g¬FÄÒ±ÀÂË	0	0	1525	0.4535	0	0	3	KMT	1	0.4281903	0.4281903	2.335410214	·s¥_¥«²H¤ô°Ï¦Ë³ò¨½
·s¥_¥«²H¤ô°Ï¥ÁÅv¨½	¾G°êºÕ	·s¥_¥«²H¤ô°Ï¥ÁÅv¨½¾G°êºÕ	1	1	1954	µLÄÒÄy¤Î¥¼¸g¬FÄÒ±ÀÂË	0	0	1005	0.4694	0	0	2	KMT	1	0.22033636	0.50176661	1.992958439	·s¥_¥«²H¤ô°Ï¥ÁÅv¨½
·s¥_¥«²H¤ô°Ï¥ÁÅv¨½	³¢²K¦L	·s¥_¥«²H¤ô°Ï¥ÁÅv¨½³¢²K¦L	2	1	1950	µLÄÒÄy¤Î¥¼¸g¬FÄÒ±ÀÂË	0	0	1136	0.5305	1	0	2	KMT	1	0.50176661	0.50176661	1.992958439	·s¥_¥«²H¤ô°Ï¥ÁÅv¨½
·s¥_¥«²H¤ô°Ï¥Á¥Í¨½	³¯§õ©ú½t	·s¥_¥«²H¤ô°Ï¥Á¥Í¨½³¯§õ©ú½t	1	0	1956	¤¤°ê°ê¥ÁÄÒ	1	0	2899	1	1	0	1	KMT	1	1	1	1	·s¥_¥«²H¤ô°Ï¥Á¥Í¨½
·s¥_¥«²H¤ô°Ï¤K¶Õ¨½	°ª¥Ã¨}	·s¥_¥«²H¤ô°Ï¤K¶Õ¨½°ª¥Ã¨}	1	1	1957	¤¤°ê°ê¥ÁÄÒ	1	0	1020	0.4818	0	0	2	KMT	1	0.23213124	0.50055885	1.997767096	·s¥_¥«²H¤ô°Ï¤K¶Õ¨½
·s¥_¥«²H¤ô°Ï¤K¶Õ¨½	¨H´Ü¸Î	·s¥_¥«²H¤ô°Ï¤K¶Õ¨½¨H´Ü¸Î	2	1	1973	µLÄÒÄy¤Î¥¼¸g¬FÄÒ±ÀÂË	0	0	1097	0.5181	1	0	2	KMT	1	0.50055885	0.50055885	1.997767096	·s¥_¥«²H¤ô°Ï¤K¶Õ¨½
·s¥_¥«²H¤ô°Ï¬ñã¸¨½	¤ý«H±R	·s¥_¥«²H¤ô°Ï¬ñã¸¨½¤ý«H±R	1	1	1956	¤¤°ê°ê¥ÁÄÒ	1	0	2326	0.6318	1	0	2	KMT	1	0.39917124	0.53466885	1.870316552	·s¥_¥«²H¤ô°Ï¬ñã¸¨½
·s¥_¥«²H¤ô°Ï¬ñã¸¨½	´öÂE«°	·s¥_¥«²H¤ô°Ï¬ñã¸¨½´öÂE«°	2	1	1952	¥Á¥D¶i¨BÄÒ	0	1	1355	0.3681	0	0	2	KMT	1	0.53466885	0.53466885	1.870316552	·s¥_¥«²H¤ô°Ï¬ñã¸¨½
·s¥_¥«²H¤ô°Ï®r³»¨½	¿c¬K¦w	·s¥_¥«²H¤ô°Ï®r³»¨½¿c¬K¦w	1	1	1961	µLÄÒÄy¤Î¥¼¸g¬FÄÒ±ÀÂË	0	0	326	0.239	1	0	6	KMT	1	0.057121	0.17412253	5.743082185	·s¥_¥«²H¤ô°Ï®r³»¨½
·s¥_¥«²H¤ô°Ï®r³»¨½	ÁÂÄR¬Â	·s¥_¥«²H¤ô°Ï®r³»¨½ÁÂÄR¬Â	2	0	1963	¤¤°ê°ê¥ÁÄÒ	1	0	167	0.1224	0	0	6	KMT	1	0.07210276	0.17412253	5.743082185	·s¥_¥«²H¤ô°Ï®r³»¨½
·s¥_¥«²H¤ô°Ï®r³»¨½	§õ¤õ«°	·s¥_¥«²H¤ô°Ï®r³»¨½§õ¤õ«°	3	1	1960	µLÄÒÄy¤Î¥¼¸g¬FÄÒ±ÀÂË	0	0	205	0.1502	0	0	6	KMT	1	0.0946628	0.17412253	5.743082185	·s¥_¥«²H¤ô°Ï®r³»¨½
·s¥_¥«²H¤ô°Ï®r³»¨½	§õ¤ÖµØ	·s¥_¥«²H¤ô°Ï®r³»¨½§õ¤ÖµØ	4	0	1956	µLÄÒÄy¤Î¥¼¸g¬FÄÒ±ÀÂË	0	0	216	0.1583	0	0	6	KMT	1	0.11972169	0.17412253	5.743082185	·s¥_¥«²H¤ô°Ï®r³»¨½
·s¥_¥«²H¤ô°Ï®r³»¨½	ªLª÷·½	·s¥_¥«²H¤ô°Ï®r³»¨½ªLª÷·½	5	1	1965	µLÄÒÄy¤Î¥¼¸g¬FÄÒ±ÀÂË	0	0	221	0.162	0	0	6	KMT	1	0.14596569	0.17412253	5.743082185	·s¥_¥«²H¤ô°Ï®r³»¨½
·s¥_¥«²H¤ô°Ï®r³»¨½	²ø«Øµo	·s¥_¥«²H¤ô°Ï®r³»¨½²ø«Øµo	6	1	1950	µLÄÒÄy¤Î¥¼¸g¬FÄÒ±ÀÂË	0	0	229	0.1678	0	0	6	KMT	1	0.17412253	0.17412253	5.743082185	·s¥_¥«²H¤ô°Ï®r³»¨½
·s¥_¥«²H¤ô°Ï°ñ®q¨½	§fÅK«°	·s¥_¥«²H¤ô°Ï°ñ®q¨½§fÅK«°	1	1	1953	¤¤°ê°ê¥ÁÄÒ	1	0	688	1	1	0	1	KMT	1	1	1	1	·s¥_¥«²H¤ô°Ï°ñ®q¨½
·s¥_¥«²H¤ô°Ï¤ô¸P¨½	³¯°·¤T	·s¥_¥«²H¤ô°Ï¤ô¸P¨½³¯°·¤T	1	1	1950	¤¤°ê°ê¥ÁÄÒ	1	0	1245	0.4047	0	0	2	KMT	1	0.16378209	0.51804513	1.930333753	·s¥_¥«²H¤ô°Ï¤ô¸P¨½
·s¥_¥«²H¤ô°Ï¤ô¸P¨½	®]ÄR©ú	·s¥_¥«²H¤ô°Ï¤ô¸P¨½®]ÄR©ú	2	0	1969	µLÄÒÄy¤Î¥¼¸g¬FÄÒ±ÀÂË	0	0	1831	0.5952	1	0	2	KMT	1	0.51804513	0.51804513	1.930333753	·s¥_¥«²H¤ô°Ï¤ô¸P¨½
·s¥_¥«²H¤ô°Ï¥_·s¨½	³\¬Kºa	·s¥_¥«²H¤ô°Ï¥_·s¨½³\¬Kºa	1	1	1958	¤¤°ê°ê¥ÁÄÒ	1	0	873	0.6457	1	0	2	KMT	1	0.41692849	0.54238613	1.843704963	·s¥_¥«²H¤ô°Ï¥_·s¨½
·s¥_¥«²H¤ô°Ï¥_·s¨½	±i³sºa	·s¥_¥«²H¤ô°Ï¥_·s¨½±i³sºa	2	1	1960	µLÄÒÄy¤Î¥¼¸g¬FÄÒ±ÀÂË	0	0	479	0.3542	0	0	2	KMT	1	0.54238613	0.54238613	1.843704963	·s¥_¥«²H¤ô°Ï¥_·s¨½
·s¥_¥«²H¤ô°Ï¥¿¼w¨½	¸â¬î­^	·s¥_¥«²H¤ô°Ï¥¿¼w¨½¸â¬î­^	1	0	1953	µLÄÒÄy¤Î¥¼¸g¬FÄÒ±ÀÂË	0	0	310	0.1523	0	0	4	KMT	1	0.02319529	0.34944196	2.86170556	·s¥_¥«²H¤ô°Ï¥¿¼w¨½
·s¥_¥«²H¤ô°Ï¥¿¼w¨½	³¢«³½ç	·s¥_¥«²H¤ô°Ï¥¿¼w¨½³¢«³½ç	2	1	1947	µLÄÒÄy¤Î¥¼¸g¬FÄÒ±ÀÂË	0	0	472	0.2319	0	0	4	KMT	1	0.0769729	0.34944196	2.86170556	·s¥_¥«²H¤ô°Ï¥¿¼w¨½
·s¥_¥«²H¤ô°Ï¥¿¼w¨½	³\²S·é	·s¥_¥«²H¤ô°Ï¥¿¼w¨½³\²S·é	3	1	1966	µLÄÒÄy¤Î¥¼¸g¬FÄÒ±ÀÂË	0	0	212	0.1041	0	0	4	KMT	1	0.08780971	0.34944196	2.86170556	·s¥_¥«²H¤ô°Ï¥¿¼w¨½
·s¥_¥«²H¤ô°Ï¥¿¼w¨½	¦ó®ü§ü	·s¥_¥«²H¤ô°Ï¥¿¼w¨½¦ó®ü§ü	4	1	1956	¤¤°ê°ê¥ÁÄÒ	1	0	1041	0.5115	1	0	4	KMT	1	0.34944196	0.34944196	2.86170556	·s¥_¥«²H¤ô°Ï¥¿¼w¨½
·s¥_¥«²H¤ô°Ï·s¿³¨½	³\¬ü´f	·s¥_¥«²H¤ô°Ï·s¿³¨½³\¬ü´f	1	0	1968	µLÄÒÄy¤Î¥¼¸g¬FÄÒ±ÀÂË	0	0	795	0.2655	0	0	4	KMT	1	0.07049025	0.25908766	3.859697525	·s¥_¥«²H¤ô°Ï·s¿³¨½
·s¥_¥«²H¤ô°Ï·s¿³¨½	ªL?½å	·s¥_¥«²H¤ô°Ï·s¿³¨½ªL?½å	2	1	1954	µLÄÒÄy¤Î¥¼¸g¬FÄÒ±ÀÂË	0	0	567	0.1893	0	0	4	KMT	1	0.10632474	0.25908766	3.859697525	·s¥_¥«²H¤ô°Ï·s¿³¨½
·s¥_¥«²H¤ô°Ï·s¿³¨½	¶À«Âµ¾	·s¥_¥«²H¤ô°Ï·s¿³¨½¶À«Âµ¾	3	1	1974	¤¤°ê°ê¥ÁÄÒ	1	0	954	0.3186	1	0	4	KMT	1	0.2078307	0.25908766	3.859697525	·s¥_¥«²H¤ô°Ï·s¿³¨½
·s¥_¥«²H¤ô°Ï·s¿³¨½	±i¹Å½å	·s¥_¥«²H¤ô°Ï·s¿³¨½±i¹Å½å	4	1	1953	µLÄÒÄy¤Î¥¼¸g¬FÄÒ±ÀÂË	0	0	678	0.2264	0	0	4	KMT	1	0.25908766	0.25908766	3.859697525	·s¥_¥«²H¤ô°Ï·s¿³¨½
·s¥_¥«²H¤ô°Ï·s¸q¨½	¿cÄ_¥þ	·s¥_¥«²H¤ô°Ï·s¸q¨½¿cÄ_¥þ	1	1	1955	¤¤°ê°ê¥ÁÄÒ	1	0	1335	0.563	1	0	3	KMT	1	0.316969	0.43927812	2.276462119	·s¥_¥«²H¤ô°Ï·s¸q¨½
·s¥_¥«²H¤ô°Ï·s¸q¨½	³¯¤ì¿Ä	·s¥_¥«²H¤ô°Ï·s¸q¨½³¯¤ì¿Ä	2	1	1955	µLÄÒÄy¤Î¥¼¸g¬FÄÒ±ÀÂË	0	0	243	0.1024	0	0	3	KMT	1	0.32745476	0.43927812	2.276462119	·s¥_¥«²H¤ô°Ï·s¸q¨½
·s¥_¥«²H¤ô°Ï·s¸q¨½	¿cªQ¾ð	·s¥_¥«²H¤ô°Ï·s¸q¨½¿cªQ¾ð	3	1	1933	µLÄÒÄy¤Î¥¼¸g¬FÄÒ±ÀÂË	0	0	793	0.3344	0	0	3	KMT	1	0.43927812	0.43927812	2.276462119	·s¥_¥«²H¤ô°Ï·s¸q¨½
·s¥_¥«²H¤ô°Ï·s¬K¨½	§f¬y·¸	·s¥_¥«²H¤ô°Ï·s¬K¨½§f¬y·¸	1	1	1938	¤¤°ê°ê¥ÁÄÒ	1	0	1009	0.3213	0	0	2	KMT	1	0.10323369	0.56373165	1.77389366	·s¥_¥«²H¤ô°Ï·s¬K¨½
·s¥_¥«²H¤ô°Ï·s¬K¨½	²ø§Ó¤å	·s¥_¥«²H¤ô°Ï·s¬K¨½²ø§Ó¤å	2	1	1967	µLÄÒÄy¤Î¥¼¸g¬FÄÒ±ÀÂË	0	0	2131	0.6786	1	0	2	KMT	1	0.56373165	0.56373165	1.77389366	·s¥_¥«²H¤ô°Ï·s¬K¨½
·s¥_¥«²H¤ô°Ï·s¥Á¨½	§õ¥Ð¤ô	·s¥_¥«²H¤ô°Ï·s¥Á¨½§õ¥Ð¤ô	1	1	1951	µLÄÒÄy¤Î¥¼¸g¬FÄÒ±ÀÂË	0	0	735	0.3075	0	0	2	KMT	1	0.09455625	0.57397401	1.742239165	·s¥_¥«²H¤ô°Ï·s¥Á¨½
·s¥_¥«²H¤ô°Ï·s¥Á¨½	ªL¸t³Ç	·s¥_¥«²H¤ô°Ï·s¥Á¨½ªL¸t³Ç	2	1	1969	¤¤°ê°ê¥ÁÄÒ	1	0	1655	0.6924	1	0	2	KMT	1	0.57397401	0.57397401	1.742239165	·s¥_¥«²H¤ô°Ï·s¥Á¨½
·s¥_¥«²H¤ô°Ï¥_§ë¨½	§õª÷«°	·s¥_¥«²H¤ô°Ï¥_§ë¨½§õª÷«°	1	1	1954	¤¤°ê°ê¥ÁÄÒ	1	0	1488	0.5442	1	0	2	KMT	1	0.29615364	0.50381613	1.9848511	·s¥_¥«²H¤ô°Ï¥_§ë¨½
·s¥_¥«²H¤ô°Ï¥_§ë¨½	ªLÀAÂ×	·s¥_¥«²H¤ô°Ï¥_§ë¨½ªLÀAÂ×	2	1	1954	µLÄÒÄy¤Î¥¼¸g¬FÄÒ±ÀÂË	0	0	1246	0.4557	0	0	2	KMT	1	0.50381613	0.50381613	1.9848511	·s¥_¥«²H¤ô°Ï¥_§ë¨½
·s¥_¥«²H¤ô°Ï¾H¤½¨½	·¨²Q´f	·s¥_¥«²H¤ô°Ï¾H¤½¨½·¨²Q´f	1	0	1964	µLÄÒÄy¤Î¥¼¸g¬FÄÒ±ÀÂË	0	0	1230	0.3876	0	0	2	KMT	1	0.15023376	0.52514505	1.904235792	·s¥_¥«²H¤ô°Ï¾H¤½¨½
·s¥_¥«²H¤ô°Ï¾H¤½¨½	ªô¬ü¬z	·s¥_¥«²H¤ô°Ï¾H¤½¨½ªô¬ü¬z	2	0	1961	¤¤°ê°ê¥ÁÄÒ	1	0	1943	0.6123	1	0	2	KMT	1	0.52514505	0.52514505	1.904235792	·s¥_¥«²H¤ô°Ï¾H¤½¨½
·s¥_¥«²H¤ô°Ï©¯ºÖ¨½	§õ©vÀé	·s¥_¥«²H¤ô°Ï©¯ºÖ¨½§õ©vÀé	1	1	1949	µLÄÒÄy¤Î¥¼¸g¬FÄÒ±ÀÂË	0	0	1929	1	1	0	1	KMT	1	1	1	1	·s¥_¥«²H¤ô°Ï©¯ºÖ¨½
·s¥_¥«²H¤ô°Ï¾Ç©²¨½	³\¼w³Ó	·s¥_¥«²H¤ô°Ï¾Ç©²¨½³\¼w³Ó	1	1	1963	¥Á¥D¶i¨BÄÒ	0	1	577	0.2754	0	0	4	KMT	1	0.07584516	0.30972689	3.228650893	·s¥_¥«²H¤ô°Ï¾Ç©²¨½
·s¥_¥«²H¤ô°Ï¾Ç©²¨½	ª÷­¸Às	·s¥_¥«²H¤ô°Ï¾Ç©²¨½ª÷­¸Às	2	1	1959	¤¤°ê°ê¥ÁÄÒ	1	0	894	0.4267	1	0	4	KMT	1	0.25791805	0.30972689	3.228650893	·s¥_¥«²H¤ô°Ï¾Ç©²¨½
·s¥_¥«²H¤ô°Ï¾Ç©²¨½	¶À©ú°ó	·s¥_¥«²H¤ô°Ï¾Ç©²¨½¶À©ú°ó	3	1	1940	µLÄÒÄy¤Î¥¼¸g¬FÄÒ±ÀÂË	0	0	184	0.0878	0	0	4	KMT	1	0.26562689	0.30972689	3.228650893	·s¥_¥«²H¤ô°Ï¾Ç©²¨½
·s¥_¥«²H¤ô°Ï¾Ç©²¨½	ªL¤å¦¨	·s¥_¥«²H¤ô°Ï¾Ç©²¨½ªL¤å¦¨	4	1	1962	µLÄÒÄy¤Î¥¼¸g¬FÄÒ±ÀÂË	0	0	440	0.21	0	0	4	KMT	1	0.30972689	0.30972689	3.228650893	·s¥_¥«²H¤ô°Ï¾Ç©²¨½
·s¥_¥«²H¤ô°Ï¤¤¿³¨½	¦¿¼yµo	·s¥_¥«²H¤ô°Ï¤¤¿³¨½¦¿¼yµo	1	1	1956	µLÄÒÄy¤Î¥¼¸g¬FÄÒ±ÀÂË	0	0	2156	1	1	0	1	KMT	1	1	1	1	·s¥_¥«²H¤ô°Ï¤¤¿³¨½
·s¥_¥«²H¤ô°Ïªø©°¨½	³¯±R·×	·s¥_¥«²H¤ô°Ïªø©°¨½³¯±R·×	1	1	1952	µLÄÒÄy¤Î¥¼¸g¬FÄÒ±ÀÂË	0	0	566	0.55	1	0	2	KMT	1	0.3025	0.50491001	1.98055095	·s¥_¥«²H¤ô°Ïªø©°¨½
·s¥_¥«²H¤ô°Ïªø©°¨½	§õ«Ø³Ó	·s¥_¥«²H¤ô°Ïªø©°¨½§õ«Ø³Ó	2	1	1962	µLÄÒÄy¤Î¥¼¸g¬FÄÒ±ÀÂË	0	0	463	0.4499	0	0	2	KMT	1	0.50491001	0.50491001	1.98055095	·s¥_¥«²H¤ô°Ïªø©°¨½
·s¥_¥«²H¤ô°Ï²M¤å¨½	³\Åã¾±	·s¥_¥«²H¤ô°Ï²M¤å¨½³\Åã¾±	1	1	1953	µLÄÒÄy¤Î¥¼¸g¬FÄÒ±ÀÂË	0	0	103	0.13	0	0	3	KMT	1	0.0169	0.41592845	2.404259675	·s¥_¥«²H¤ô°Ï²M¤å¨½
·s¥_¥«²H¤ô°Ï²M¤å¨½	©P¤å¯P	·s¥_¥«²H¤ô°Ï²M¤å¨½©P¤å¯P	2	1	1961	µLÄÒÄy¤Î¥¼¸g¬FÄÒ±ÀÂË	0	0	425	0.5366	1	0	3	KMT	1	0.30483956	0.41592845	2.404259675	·s¥_¥«²H¤ô°Ï²M¤å¨½
·s¥_¥«²H¤ô°Ï²M¤å¨½	ªL§Ó©¾	·s¥_¥«²H¤ô°Ï²M¤å¨½ªL§Ó©¾	3	1	1954	µLÄÒÄy¤Î¥¼¸g¬FÄÒ±ÀÂË	0	0	264	0.3333	0	0	3	KMT	1	0.41592845	0.41592845	2.404259675	·s¥_¥«²H¤ô°Ï²M¤å¨½
·s¥_¥«²H¤ô°Ï¯óªF¨½	¶À³{±ß	·s¥_¥«²H¤ô°Ï¯óªF¨½¶À³{±ß	1	1	1958	µLÄÒÄy¤Î¥¼¸g¬FÄÒ±ÀÂË	0	0	465	1	1	0	1	KMT	1	1	1	1	·s¥_¥«²H¤ô°Ï¯óªF¨½
·s¥_¥«²H¤ô°Ï¨ó¤¸¨½	ªL³Ó¥°	·s¥_¥«²H¤ô°Ï¨ó¤¸¨½ªL³Ó¥°	1	1	1954	µLÄÒÄy¤Î¥¼¸g¬FÄÒ±ÀÂË	0	0	341	0.3623	0	0	3	KMT	1	0.13126129	0.42661366	2.34404121	·s¥_¥«²H¤ô°Ï¨ó¤¸¨½
·s¥_¥«²H¤ô°Ï¨ó¤¸¨½	¿½¼y©M	·s¥_¥«²H¤ô°Ï¨ó¤¸¨½¿½¼y©M	2	1	1964	µLÄÒÄy¤Î¥¼¸g¬FÄÒ±ÀÂË	0	0	502	0.5334	1	0	3	KMT	1	0.41577685	0.42661366	2.34404121	·s¥_¥«²H¤ô°Ï¨ó¤¸¨½
·s¥_¥«²H¤ô°Ï¨ó¤¸¨½	±i®ÚªQ	·s¥_¥«²H¤ô°Ï¨ó¤¸¨½±i®ÚªQ	3	1	1933	µLÄÒÄy¤Î¥¼¸g¬FÄÒ±ÀÂË	0	0	98	0.1041	0	0	3	KMT	1	0.42661366	0.42661366	2.34404121	·s¥_¥«²H¤ô°Ï¨ó¤¸¨½
·s¥_¥«²H¤ô°Ï¥Ã¦N¨½	½²¨k	·s¥_¥«²H¤ô°Ï¥Ã¦N¨½½²¨k	1	1	1955	µLÄÒÄy¤Î¥¼¸g¬FÄÒ±ÀÂË	0	0	34	0.049	0	0	3	KMT	1	0.002401	0.49646132	2.014255612	·s¥_¥«²H¤ô°Ï¥Ã¦N¨½
·s¥_¥«²H¤ô°Ï¥Ã¦N¨½	±iºÑ®Z	·s¥_¥«²H¤ô°Ï¥Ã¦N¨½±iºÑ®Z	2	0	1955	¤¤°ê°ê¥ÁÄÒ	1	0	229	0.3304	0	0	3	KMT	1	0.11156516	0.49646132	2.014255612	·s¥_¥«²H¤ô°Ï¥Ã¦N¨½
·s¥_¥«²H¤ô°Ï¥Ã¦N¨½	ÁÂ¦w´Ñ	·s¥_¥«²H¤ô°Ï¥Ã¦N¨½ÁÂ¦w´Ñ	3	1	1963	¤¤°ê°ê¥ÁÄÒ	1	0	430	0.6204	1	0	3	KMT	1	0.49646132	0.49646132	2.014255612	·s¥_¥«²H¤ô°Ï¥Ã¦N¨½
·s¥_¥«²H¤ô°Ï¥Á¦w¨½	ªL±R¤å	·s¥_¥«²H¤ô°Ï¥Á¦w¨½ªL±R¤å	1	1	1942	µLÄÒÄy¤Î¥¼¸g¬FÄÒ±ÀÂË	0	0	216	0.3913	0	0	2	KMT	1	0.15311569	0.52350965	1.910184464	·s¥_¥«²H¤ô°Ï¥Á¦w¨½
·s¥_¥«²H¤ô°Ï¥Á¦w¨½	¾G­^©M	·s¥_¥«²H¤ô°Ï¥Á¦w¨½¾G­^©M	2	1	1957	¤¤°ê°ê¥ÁÄÒ	1	0	336	0.6086	1	0	2	KMT	1	0.52350965	0.52350965	1.910184464	·s¥_¥«²H¤ô°Ï¥Á¦w¨½
·s¥_¥«²H¤ô°Ï·s¥Í¨½	¬x¥¿©v	·s¥_¥«²H¤ô°Ï·s¥Í¨½¬x¥¿©v	1	1	1952	µLÄÒÄy¤Î¥¼¸g¬FÄÒ±ÀÂË	0	0	247	0.7507	1	0	2	KMT	1	0.56355049	0.62565113	1.598334842	·s¥_¥«²H¤ô°Ï·s¥Í¨½
·s¥_¥«²H¤ô°Ï·s¥Í¨½	³¢¥¿°¶	·s¥_¥«²H¤ô°Ï·s¥Í¨½³¢¥¿°¶	2	1	1974	¤¤°ê°ê¥ÁÄÒ	1	0	82	0.2492	0	0	2	KMT	1	0.62565113	0.62565113	1.598334842	·s¥_¥«²H¤ô°Ï·s¥Í¨½
·s¥_¥«²H¤ô°Ï¤å¤Æ¨½	©P·q´¼	·s¥_¥«²H¤ô°Ï¤å¤Æ¨½©P·q´¼	1	1	1959	µLÄÒÄy¤Î¥¼¸g¬FÄÒ±ÀÂË	0	0	568	0.5373	1	0	2	KMT	1	0.28869129	0.50269005	1.989297381	·s¥_¥«²H¤ô°Ï¤å¤Æ¨½
·s¥_¥«²H¤ô°Ï¤å¤Æ¨½	­J¸t¨k	·s¥_¥«²H¤ô°Ï¤å¤Æ¨½­J¸t¨k	2	1	1968	¤¤°ê°ê¥ÁÄÒ	1	0	489	0.4626	0	0	2	KMT	1	0.50269005	0.50269005	1.989297381	·s¥_¥«²H¤ô°Ï¤å¤Æ¨½
·s¥_¥«²H¤ô°Ïªo¨®¨½	¾Gªü°]	·s¥_¥«²H¤ô°Ïªo¨®¨½¾Gªü°]	1	1	1946	¤¤°ê°ê¥ÁÄÒ	1	0	1262	0.4344	0	0	2	KMT	1	0.18870336	0.50849361	1.966593051	·s¥_¥«²H¤ô°Ïªo¨®¨½
·s¥_¥«²H¤ô°Ïªo¨®¨½	­ðÄ×¾ì	·s¥_¥«²H¤ô°Ïªo¨®¨½­ðÄ×¾ì	2	0	1958	¤¤°ê°ê¥ÁÄÒ	1	0	1643	0.5655	1	0	2	KMT	1	0.50849361	0.50849361	1.966593051	·s¥_¥«²H¤ô°Ïªo¨®¨½
·s¥_¥«²H¤ô°Ï¨F±[¨½	³¯¤å¥ò	·s¥_¥«²H¤ô°Ï¨F±[¨½³¯¤å¥ò	1	1	1956	µLÄÒÄy¤Î¥¼¸g¬FÄÒ±ÀÂË	0	0	803	0.4395	0	0	2	KMT	1	0.19316025	0.50720841	1.971576142	·s¥_¥«²H¤ô°Ï¨F±[¨½
·s¥_¥«²H¤ô°Ï¨F±[¨½	¤ýÄR¯]	·s¥_¥«²H¤ô°Ï¨F±[¨½¤ýÄR¯]	2	0	1951	µLÄÒÄy¤Î¥¼¸g¬FÄÒ±ÀÂË	0	0	1024	0.5604	1	0	2	KMT	1	0.50720841	0.50720841	1.971576142	·s¥_¥«²H¤ô°Ï¨F±[¨½
·s¥_¥«²H¤ô°Ï¤jÉÜ¨½	¾G²»¥­	·s¥_¥«²H¤ô°Ï¤jÉÜ¨½¾G²»¥­	1	1	1963	¤¤°ê°ê¥ÁÄÒ	1	0	873	0.4054	0	0	2	KMT	1	0.16434916	0.51777941	1.931324384	·s¥_¥«²H¤ô°Ï¤jÉÜ¨½
·s¥_¥«²H¤ô°Ï¤jÉÜ¨½	ªL«Ø¥ò	·s¥_¥«²H¤ô°Ï¤jÉÜ¨½ªL«Ø¥ò	2	1	1973	¤¤°ê°ê¥ÁÄÒ	1	0	1280	0.5945	1	0	2	KMT	1	0.51777941	0.51777941	1.931324384	·s¥_¥«²H¤ô°Ï¤jÉÜ¨½
·s¥_¥«¤K¨½°ÏÀs·½¨½	¾G½÷·×	·s¥_¥«¤K¨½°ÏÀs·½¨½¾G½÷·×	1	1	1956	¤¤°ê°ê¥ÁÄÒ	1	0	2663	1	1	0	1	KMT	1	1	1	1	·s¥_¥«¤K¨½°ÏÀs·½¨½
·s¥_¥«¤K¨½°Ï¦Ì­Ü¨½	®}°¶³Ô	·s¥_¥«¤K¨½°Ï¦Ì­Ü¨½®}°¶³Ô	1	1	1979	µLÄÒÄy¤Î¥¼¸g¬FÄÒ±ÀÂË	0	0	990	0.5615	1	0	2	KMT	1	0.31528225	0.50747681	1.970533392	·s¥_¥«¤K¨½°Ï¦Ì­Ü¨½
·s¥_¥«¤K¨½°Ï¦Ì­Ü¨½	¤ý¬î¬Â	·s¥_¥«¤K¨½°Ï¦Ì­Ü¨½¤ý¬î¬Â	2	0	1962	µLÄÒÄy¤Î¥¼¸g¬FÄÒ±ÀÂË	0	0	773	0.4384	0	0	2	KMT	1	0.50747681	0.50747681	1.970533392	·s¥_¥«¤K¨½°Ï¦Ì­Ü¨½
·s¥_¥«¤K¨½°Ï¤j®r¨½	ªL¨q?	·s¥_¥«¤K¨½°Ï¤j®r¨½ªL¨q?	1	0	1965	¤¤°ê°ê¥ÁÄÒ	1	0	1142	1	1	0	1	KMT	1	1	1	1	·s¥_¥«¤K¨½°Ï¤j®r¨½
·s¥_¥«¤K¨½°Ï°ñÀY¨½	·¨§Ó«n	·s¥_¥«¤K¨½°Ï°ñÀY¨½·¨§Ó«n	1	1	1967	µLÄÒÄy¤Î¥¼¸g¬FÄÒ±ÀÂË	0	0	679	0.3629	0	0	2	KMT	1	0.13169641	0.53746541	1.860584851	·s¥_¥«¤K¨½°Ï°ñÀY¨½
·s¥_¥«¤K¨½°Ï°ñÀY¨½	±i²Q¬Â	·s¥_¥«¤K¨½°Ï°ñÀY¨½±i²Q¬Â	2	0	1967	µLÄÒÄy¤Î¥¼¸g¬FÄÒ±ÀÂË	0	0	1192	0.637	1	0	2	KMT	1	0.53746541	0.53746541	1.860584851	·s¥_¥«¤K¨½°Ï°ñÀY¨½
·s¥_¥«¤K¨½°Ï³»¯Ë¨½	¶ÀªLµo	·s¥_¥«¤K¨½°Ï³»¯Ë¨½¶ÀªLµo	1	1	1966	µLÄÒÄy¤Î¥¼¸g¬FÄÒ±ÀÂË	0	0	495	0.4145	0	0	2	KMT	1	0.17181025	0.51450341	1.943621715	·s¥_¥«¤K¨½°Ï³»¯Ë¨½
·s¥_¥«¤K¨½°Ï³»¯Ë¨½	¬x§Ó¦¨	·s¥_¥«¤K¨½°Ï³»¯Ë¨½¬x§Ó¦¨	2	1	1966	µLÄÒÄy¤Î¥¼¸g¬FÄÒ±ÀÂË	0	0	699	0.5854	1	0	2	KMT	1	0.51450341	0.51450341	1.943621715	·s¥_¥«¤K¨½°Ï³»¯Ë¨½
·s¥_¥«¤K¨½°ÏÂÂ«°¨½	³Å»ñµ^	·s¥_¥«¤K¨½°ÏÂÂ«°¨½³Å»ñµ^	1	0	1964	¤¤°ê°ê¥ÁÄÒ	1	0	1312	0.3885	0	0	2	KMT	1	0.15093225	0.52474221	1.905697657	·s¥_¥«¤K¨½°ÏÂÂ«°¨½
·s¥_¥«¤K¨½°ÏÂÂ«°¨½	³¯¤Ñµo	·s¥_¥«¤K¨½°ÏÂÂ«°¨½³¯¤Ñµo	2	1	1960	µLÄÒÄy¤Î¥¼¸g¬FÄÒ±ÀÂË	0	0	2065	0.6114	1	0	2	KMT	1	0.52474221	0.52474221	1.905697657	·s¥_¥«¤K¨½°ÏÂÂ«°¨½
·s¥_¥«¤K¨½°Ï°T¶í¨½	±iª÷¶Q	·s¥_¥«¤K¨½°Ï°T¶í¨½±iª÷¶Q	1	1	1956	¤¤°ê°ê¥ÁÄÒ	1	0	1761	1	1	0	1	KMT	1	1	1	1	·s¥_¥«¤K¨½°Ï°T¶í¨½
·s¥_¥«¤K¨½°ÏÓy¦é¨½	³¯²±¨k	·s¥_¥«¤K¨½°ÏÓy¦é¨½³¯²±¨k	1	1	1945	µLÄÒÄy¤Î¥¼¸g¬FÄÒ±ÀÂË	0	0	845	1	1	0	1	KMT	1	1	1	1	·s¥_¥«¤K¨½°ÏÓy¦é¨½
·s¥_¥«¤K¨½°Ïªø§|¨½	¬x±Ò¸Û	·s¥_¥«¤K¨½°Ïªø§|¨½¬x±Ò¸Û	1	1	1954	¤¤°ê°ê¥ÁÄÒ	1	0	668	0.6325	1	0	2	KMT	1	0.40005625	0.53503901	1.869022597	·s¥_¥«¤K¨½°Ïªø§|¨½
·s¥_¥«¤K¨½°Ïªø§|¨½	½²¤å¼y	·s¥_¥«¤K¨½°Ïªø§|¨½½²¤å¼y	2	1	1968	µLÄÒÄy¤Î¥¼¸g¬FÄÒ±ÀÂË	0	0	388	0.3674	0	0	2	KMT	1	0.53503901	0.53503901	1.869022597	·s¥_¥«¤K¨½°Ïªø§|¨½
·s¥_¥«¤K¨½°Ï¤U¯Ë¨½	¨Lª÷¶Ç	·s¥_¥«¤K¨½°Ï¤U¯Ë¨½¨Lª÷¶Ç	1	1	1955	¤¤°ê°ê¥ÁÄÒ	1	0	863	1	1	0	1	KMT	1	1	1	1	·s¥_¥«¤K¨½°Ï¤U¯Ë¨½
·s¥_¥«ªL¤f°ÏªFªL¨½	³¯¬x»«	·s¥_¥«ªL¤f°ÏªFªL¨½³¯¬x»«	1	1	1963	µLÄÒÄy¤Î¥¼¸g¬FÄÒ±ÀÂË	0	0	2343	1	1	0	1	KMT	1	1	1	1	·s¥_¥«ªL¤f°ÏªFªL¨½
·s¥_¥«ªL¤f°ÏªL¤f¨½	Ä¬®L©v	·s¥_¥«ªL¤f°ÏªL¤f¨½Ä¬®L©v	1	1	1969	¤¤°ê°ê¥ÁÄÒ	1	0	2303	1	1	0	1	KMT	1	1	1	1	·s¥_¥«ªL¤f°ÏªL¤f¨½
·s¥_¥«ªL¤f°Ï¦èªL¨½	¤ý°êµØ	·s¥_¥«ªL¤f°Ï¦èªL¨½¤ý°êµØ	1	1	1956	¤¤°ê°ê¥ÁÄÒ	1	0	3350	1	1	0	1	KMT	1	1	1	1	·s¥_¥«ªL¤f°Ï¦èªL¨½
·s¥_¥«ªL¤f°Ïµ×´ò¨½	¸â¤å¥Í	·s¥_¥«ªL¤f°Ïµ×´ò¨½¸â¤å¥Í	1	1	1935	¤¤°ê°ê¥ÁÄÒ	1	0	2140	1	1	0	1	KMT	1	1	1	1	·s¥_¥«ªL¤f°Ïµ×´ò¨½
·s¥_¥«ªL¤f°Ï¤¤´ò¨½	§E¬K¯q	·s¥_¥«ªL¤f°Ï¤¤´ò¨½§E¬K¯q	1	1	1950	µLÄÒÄy¤Î¥¼¸g¬FÄÒ±ÀÂË	0	0	354	0.1792	0	0	3	KMT	1	0.03211264	0.37576682	2.661224852	·s¥_¥«ªL¤f°Ï¤¤´ò¨½
·s¥_¥«ªL¤f°Ï¤¤´ò¨½	³¯°ê¬Ã	·s¥_¥«ªL¤f°Ï¤¤´ò¨½³¯°ê¬Ã	2	1	1952	¤¤°ê°ê¥ÁÄÒ	1	0	927	0.4693	1	0	3	KMT	1	0.25235513	0.37576682	2.661224852	·s¥_¥«ªL¤f°Ï¤¤´ò¨½
·s¥_¥«ªL¤f°Ï¤¤´ò¨½	©P®Û­^	·s¥_¥«ªL¤f°Ï¤¤´ò¨½©P®Û­^	3	0	1962	µLÄÒÄy¤Î¥¼¸g¬FÄÒ±ÀÂË	0	0	694	0.3513	0	0	3	KMT	1	0.37576682	0.37576682	2.661224852	·s¥_¥«ªL¤f°Ï¤¤´ò¨½
·s¥_¥«ªL¤f°Ï´ò¥_¨½	±i¤å²M	·s¥_¥«ªL¤f°Ï´ò¥_¨½±i¤å²M	1	1	1959	¤¤°ê°ê¥ÁÄÒ	1	0	887	1	1	0	1	KMT	1	1	1	1	·s¥_¥«ªL¤f°Ï´ò¥_¨½
·s¥_¥«ªL¤f°Ï´ò«n¨½	ªL·¨²±	·s¥_¥«ªL¤f°Ï´ò«n¨½ªL·¨²±	1	1	1966	µLÄÒÄy¤Î¥¼¸g¬FÄÒ±ÀÂË	0	0	1729	0.3659	0	0	3	KMT	1	0.13388281	0.34834163	2.870745021	·s¥_¥«ªL¤f°Ï´ò«n¨½
·s¥_¥«ªL¤f°Ï´ò«n¨½	¬x©úºÖ	·s¥_¥«ªL¤f°Ï´ò«n¨½¬x©úºÖ	2	1	1945	µLÄÒÄy¤Î¥¼¸g¬FÄÒ±ÀÂË	0	0	1110	0.2349	0	0	3	KMT	1	0.18906082	0.34834163	2.870745021	·s¥_¥«ªL¤f°Ï´ò«n¨½
·s¥_¥«ªL¤f°Ï´ò«n¨½	¬xºÖ¸S	·s¥_¥«ªL¤f°Ï´ò«n¨½¬xºÖ¸S	3	1	1942	¤¤°ê°ê¥ÁÄÒ	1	0	1886	0.3991	1	0	3	KMT	1	0.34834163	0.34834163	2.870745021	·s¥_¥«ªL¤f°Ï´ò«n¨½
·s¥_¥«ªL¤f°Ï«n¶Õ¨½	·¨¥@©w	·s¥_¥«ªL¤f°Ï«n¶Õ¨½·¨¥@©w	1	1	1955	µLÄÒÄy¤Î¥¼¸g¬FÄÒ±ÀÂË	0	0	2134	0.4731	0	0	2	KMT	1	0.22382361	0.50134185	1.994646966	·s¥_¥«ªL¤f°Ï«n¶Õ¨½
·s¥_¥«ªL¤f°Ï«n¶Õ¨½	³¯°êÒm	·s¥_¥«ªL¤f°Ï«n¶Õ¨½³¯°êÒm	2	1	1958	µLÄÒÄy¤Î¥¼¸g¬FÄÒ±ÀÂË	0	0	2376	0.5268	1	0	2	KMT	1	0.50134185	0.50134185	1.994646966	·s¥_¥«ªL¤f°Ï«n¶Õ¨½
·s¥_¥«ªL¤f°Ï¤¯·R¨½	®]®Û­^	·s¥_¥«ªL¤f°Ï¤¯·R¨½®]®Û­^	1	0	1951	µLÄÒÄy¤Î¥¼¸g¬FÄÒ±ÀÂË	0	0	1613	0.5401	1	0	2	KMT	1	0.29170801	0.50312405	1.987581393	·s¥_¥«ªL¤f°Ï¤¯·R¨½
·s¥_¥«ªL¤f°Ï¤¯·R¨½	¼BÂE¾ô	·s¥_¥«ªL¤f°Ï¤¯·R¨½¼BÂE¾ô	2	1	1960	µLÄÒÄy¤Î¥¼¸g¬FÄÒ±ÀÂË	0	0	1373	0.4598	0	0	2	KMT	1	0.50312405	0.50312405	1.987581393	·s¥_¥«ªL¤f°Ï¤¯·R¨½
·s¥_¥«ªL¤f°ÏÄRªL¨½	Á§¯Â¨}	·s¥_¥«ªL¤f°ÏÄRªL¨½Á§¯Â¨}	1	0	1963	¤¤°ê°ê¥ÁÄÒ	1	0	2430	0.6377	1	0	2	KMT	1	0.40666129	0.53785013	1.85925399	·s¥_¥«ªL¤f°ÏÄRªL¨½
·s¥_¥«ªL¤f°ÏÄRªL¨½	ªL¬F¼Ý	·s¥_¥«ªL¤f°ÏÄRªL¨½ªL¬F¼Ý	2	1	1961	µLÄÒÄy¤Î¥¼¸g¬FÄÒ±ÀÂË	0	0	1380	0.3622	0	0	2	KMT	1	0.53785013	0.53785013	1.85925399	·s¥_¥«ªL¤f°ÏÄRªL¨½
·s¥_¥«ªL¤f°ÏªF¶Õ¨½	Ã¹¶Ç?	·s¥_¥«ªL¤f°ÏªF¶Õ¨½Ã¹¶Ç?	1	1	1953	µLÄÒÄy¤Î¥¼¸g¬FÄÒ±ÀÂË	0	0	979	0.3003	0	0	3	KMT	1	0.09018009	0.33984022	2.9425593	·s¥_¥«ªL¤f°ÏªF¶Õ¨½
·s¥_¥«ªL¤f°ÏªF¶Õ¨½	§õ¤å°ò	·s¥_¥«ªL¤f°ÏªF¶Õ¨½§õ¤å°ò	2	1	1960	µLÄÒÄy¤Î¥¼¸g¬FÄÒ±ÀÂË	0	0	1303	0.3998	1	0	3	KMT	1	0.25002013	0.33984022	2.9425593	·s¥_¥«ªL¤f°ÏªF¶Õ¨½
·s¥_¥«ªL¤f°ÏªF¶Õ¨½	³¢«Ø§Ó	·s¥_¥«ªL¤f°ÏªF¶Õ¨½³¢«Ø§Ó	3	1	1941	¤¤°ê°ê¥ÁÄÒ	1	0	977	0.2997	0	0	3	KMT	1	0.33984022	0.33984022	2.9425593	·s¥_¥«ªL¤f°ÏªF¶Õ¨½
·s¥_¥«ªL¤f°ÏÄR¶é¨½	³¯±l²Æ	·s¥_¥«ªL¤f°ÏÄR¶é¨½³¯±l²Æ	1	1	1962	µLÄÒÄy¤Î¥¼¸g¬FÄÒ±ÀÂË	0	0	781	0.3851	0	0	2	KMT	1	0.14830201	0.52628105	1.900125418	·s¥_¥«ªL¤f°ÏÄR¶é¨½
·s¥_¥«ªL¤f°ÏÄR¶é¨½	¶À­Ý©ú	·s¥_¥«ªL¤f°ÏÄR¶é¨½¶À­Ý©ú	2	1	1952	¤¤°ê°ê¥ÁÄÒ	1	0	1247	0.6148	1	0	2	KMT	1	0.52628105	0.52628105	1.900125418	·s¥_¥«ªL¤f°ÏÄR¶é¨½
·s¥_¥«ªL¤f°Ï³»ºÖ¨½	Ä¬·½©M	·s¥_¥«ªL¤f°Ï³»ºÖ¨½Ä¬·½©M	1	1	1964	µLÄÒÄy¤Î¥¼¸g¬FÄÒ±ÀÂË	0	0	692	1	1	0	1	KMT	1	1	1	1	·s¥_¥«ªL¤f°Ï³»ºÖ¨½
·s¥_¥«ªL¤f°Ï¤UºÖ¨½	§õ¬ü¥É	·s¥_¥«ªL¤f°Ï¤UºÖ¨½§õ¬ü¥É	1	0	1961	¤¤°ê°ê¥ÁÄÒ	1	0	706	1	1	0	1	KMT	1	1	1	1	·s¥_¥«ªL¤f°Ï¤UºÖ¨½
·s¥_¥«ªL¤f°Ï¹ÅÄ_¨½	­â¤T­¦	·s¥_¥«ªL¤f°Ï¹ÅÄ_¨½­â¤T­¦	1	1	1942	µLÄÒÄy¤Î¥¼¸g¬FÄÒ±ÀÂË	0	0	338	0.5052	1	0	3	KMT	1	0.25522704	0.44905924	2.226877683	·s¥_¥«ªL¤f°Ï¹ÅÄ_¨½
·s¥_¥«ªL¤f°Ï¹ÅÄ_¨½	¶À¶i¤¤	·s¥_¥«ªL¤f°Ï¹ÅÄ_¨½¶À¶i¤¤	2	1	1949	µLÄÒÄy¤Î¥¼¸g¬FÄÒ±ÀÂË	0	0	39	0.0582	0	0	3	KMT	1	0.25861428	0.44905924	2.226877683	·s¥_¥«ªL¤f°Ï¹ÅÄ_¨½
·s¥_¥«ªL¤f°Ï¹ÅÄ_¨½	¶À§e²»	·s¥_¥«ªL¤f°Ï¹ÅÄ_¨½¶À§e²»	3	1	1946	¤¤°ê°ê¥ÁÄÒ	1	0	292	0.4364	0	0	3	KMT	1	0.44905924	0.44905924	2.226877683	·s¥_¥«ªL¤f°Ï¹ÅÄ_¨½
·s¥_¥«ªL¤f°Ï·ç¥­¨½	¿àªü©¾	·s¥_¥«ªL¤f°Ï·ç¥­¨½¿àªü©¾	1	1	1956	µLÄÒÄy¤Î¥¼¸g¬FÄÒ±ÀÂË	0	0	275	0.4867	0	0	2	KMT	1	0.23687689	0.50025113	1.998995984	·s¥_¥«ªL¤f°Ï·ç¥­¨½
·s¥_¥«ªL¤f°Ï·ç¥­¨½	Àdªü¼Ð	·s¥_¥«ªL¤f°Ï·ç¥­¨½Àdªü¼Ð	2	1	1947	¤¤°ê°ê¥ÁÄÒ	1	0	290	0.5132	1	0	2	KMT	1	0.50025113	0.50025113	1.998995984	·s¥_¥«ªL¤f°Ï·ç¥­¨½
·s¥_¥«ªL¤f°Ï¤Ó¥­¨½	ÁÂ¥É²»	·s¥_¥«ªL¤f°Ï¤Ó¥­¨½ÁÂ¥É²»	1	1	1958	µLÄÒÄy¤Î¥¼¸g¬FÄÒ±ÀÂË	0	0	702	0.6842	1	0	2	KMT	1	0.46812964	0.56779613	1.761195519	·s¥_¥«ªL¤f°Ï¤Ó¥­¨½
·s¥_¥«ªL¤f°Ï¤Ó¥­¨½	³¯¬±·×	·s¥_¥«ªL¤f°Ï¤Ó¥­¨½³¯¬±·×	2	1	1953	µLÄÒÄy¤Î¥¼¸g¬FÄÒ±ÀÂË	0	0	324	0.3157	0	0	2	KMT	1	0.56779613	0.56779613	1.761195519	·s¥_¥«ªL¤f°Ï¤Ó¥­¨½
·s¥_¥«¤­ªÑ°Ï¿³¬Ã¨½	¾G°êºa	·s¥_¥«¤­ªÑ°Ï¿³¬Ã¨½¾G°êºa	1	1	1965	µLÄÒÄy¤Î¥¼¸g¬FÄÒ±ÀÂË	0	0	2422	1	1	0	1	KMT	1	1	1	1	·s¥_¥«¤­ªÑ°Ï¿³¬Ã¨½
·s¥_¥«¤­ªÑ°Ï§ó¼d¨½	³¯´ÂªK	·s¥_¥«¤­ªÑ°Ï§ó¼d¨½³¯´ÂªK	1	1	1949	µLÄÒÄy¤Î¥¼¸g¬FÄÒ±ÀÂË	0	0	735	1	1	0	1	KMT	1	1	1	1	·s¥_¥«¤­ªÑ°Ï§ó¼d¨½
·s¥_¥«¤­ªÑ°Ï¶°ºÖ¨½	¸­¶³¤þ	·s¥_¥«¤­ªÑ°Ï¶°ºÖ¨½¸­¶³¤þ	1	1	1944	µLÄÒÄy¤Î¥¼¸g¬FÄÒ±ÀÂË	0	0	1237	0.5799	1	0	2	KMT	1	0.33628401	0.51268401	1.95051919	·s¥_¥«¤­ªÑ°Ï¶°ºÖ¨½
·s¥_¥«¤­ªÑ°Ï¶°ºÖ¨½	³¯¤ì§ø	·s¥_¥«¤­ªÑ°Ï¶°ºÖ¨½³¯¤ì§ø	2	1	1940	¤¤°ê°ê¥ÁÄÒ	1	0	896	0.42	0	0	2	KMT	1	0.51268401	0.51268401	1.95051919	·s¥_¥«¤­ªÑ°Ï¶°ºÖ¨½
·s¥_¥«¤­ªÑ°Ï¶°½å¨½	³¯¤å»«	·s¥_¥«¤­ªÑ°Ï¶°½å¨½³¯¤å»«	1	1	1956	µLÄÒÄy¤Î¥¼¸g¬FÄÒ±ÀÂË	0	0	1659	1	1	0	1	KMT	1	1	1	1	·s¥_¥«¤­ªÑ°Ï¶°½å¨½
·s¥_¥«¤­ªÑ°ÏÆ[­µ¨½	³¯ª÷¥þ	·s¥_¥«¤­ªÑ°ÏÆ[­µ¨½³¯ª÷¥þ	1	1	1946	µLÄÒÄy¤Î¥¼¸g¬FÄÒ±ÀÂË	0	0	890	1	1	0	1	KMT	1	1	1	1	·s¥_¥«¤­ªÑ°ÏÆ[­µ¨½
·s¥_¥«¤­ªÑ°Ï¦¨¦{¨½	³¯ªL¯q	·s¥_¥«¤­ªÑ°Ï¦¨¦{¨½³¯ªL¯q	1	1	1957	µLÄÒÄy¤Î¥¼¸g¬FÄÒ±ÀÂË	0	0	1814	0.598	1	0	2	KMT	1	0.357604	0.51912761	1.926308639	·s¥_¥«¤­ªÑ°Ï¦¨¦{¨½
·s¥_¥«¤­ªÑ°Ï¦¨¦{¨½	¬x®ü²M	·s¥_¥«¤­ªÑ°Ï¦¨¦{¨½¬x®ü²M	2	1	1938	¤¤°ê°ê¥ÁÄÒ	1	0	1219	0.4019	0	0	2	KMT	1	0.51912761	0.51912761	1.926308639	·s¥_¥«¤­ªÑ°Ï¦¨¦{¨½
·s¥_¥«¤­ªÑ°Ï¦¨¼w¨½	³¯¦¸ªâ	·s¥_¥«¤­ªÑ°Ï¦¨¼w¨½³¯¦¸ªâ	1	0	1964	¤¤°ê°ê¥ÁÄÒ	1	0	573	0.3312	0	0	3	KMT	1	0.10969344	0.33497273	2.985317641	·s¥_¥«¤­ªÑ°Ï¦¨¼w¨½
·s¥_¥«¤­ªÑ°Ï¦¨¼w¨½	³¯Ä_¯u	·s¥_¥«¤­ªÑ°Ï¦¨¼w¨½³¯Ä_¯u	2	0	1945	µLÄÒÄy¤Î¥¼¸g¬FÄÒ±ÀÂË	0	0	528	0.3052	0	0	3	KMT	1	0.20284048	0.33497273	2.985317641	·s¥_¥«¤­ªÑ°Ï¦¨¼w¨½
·s¥_¥«¤­ªÑ°Ï¦¨¼w¨½	ªL³¯¯À±ö	·s¥_¥«¤­ªÑ°Ï¦¨¼w¨½ªL³¯¯À±ö	3	0	1953	µLÄÒÄy¤Î¥¼¸g¬FÄÒ±ÀÂË	0	0	629	0.3635	1	0	3	KMT	1	0.33497273	0.33497273	2.985317641	·s¥_¥«¤­ªÑ°Ï¦¨¼w¨½
·s¥_¥«¤­ªÑ°Ï¦¨¥\¨½	³¯¤j¦N	·s¥_¥«¤­ªÑ°Ï¦¨¥\¨½³¯¤j¦N	1	1	1939	µLÄÒÄy¤Î¥¼¸g¬FÄÒ±ÀÂË	0	0	946	0.3486	0	0	2	KMT	1	0.12152196	0.54571365	1.832462868	·s¥_¥«¤­ªÑ°Ï¦¨¥\¨½
·s¥_¥«¤­ªÑ°Ï¦¨¥\¨½	·¨¤ôÀs	·s¥_¥«¤­ªÑ°Ï¦¨¥\¨½·¨¤ôÀs	2	1	1950	µLÄÒÄy¤Î¥¼¸g¬FÄÒ±ÀÂË	0	0	1767	0.6513	1	0	2	KMT	1	0.54571365	0.54571365	1.832462868	·s¥_¥«¤­ªÑ°Ï¦¨¥\¨½
·s¥_¥«¤­ªÑ°Ï¦¨®õ¨½	§d°ê¥þ	·s¥_¥«¤­ªÑ°Ï¦¨®õ¨½§d°ê¥þ	1	1	1940	µLÄÒÄy¤Î¥¼¸g¬FÄÒ±ÀÂË	0	0	696	0.2728	0	0	2	KMT	1	0.07441984	0.60309425	1.658115626	·s¥_¥«¤­ªÑ°Ï¦¨®õ¨½
·s¥_¥«¤­ªÑ°Ï¦¨®õ¨½	¼ï©ú§»	·s¥_¥«¤­ªÑ°Ï¦¨®õ¨½¼ï©ú§»	2	1	1964	µLÄÒÄy¤Î¥¼¸g¬FÄÒ±ÀÂË	0	0	1855	0.7271	1	0	2	KMT	1	0.60309425	0.60309425	1.658115626	·s¥_¥«¤­ªÑ°Ï¦¨®õ¨½
·s¥_¥«¤­ªÑ°Ï¤­Às¨½	³¯¤õ	·s¥_¥«¤­ªÑ°Ï¤­Às¨½³¯¤õ	1	1	1950	µLÄÒÄy¤Î¥¼¸g¬FÄÒ±ÀÂË	0	0	474	0.4693	0	0	2	KMT	1	0.22024249	0.50177885	1.992909825	·s¥_¥«¤­ªÑ°Ï¤­Às¨½
·s¥_¥«¤­ªÑ°Ï¤­Às¨½	³¯¿P¤s	·s¥_¥«¤­ªÑ°Ï¤­Às¨½³¯¿P¤s	2	1	1952	µLÄÒÄy¤Î¥¼¸g¬FÄÒ±ÀÂË	0	0	536	0.5306	1	0	2	KMT	1	0.50177885	0.50177885	1.992909825	·s¥_¥«¤­ªÑ°Ï¤­Às¨½
·s¥_¥«¤­ªÑ°Ï¤­ºÖ¨½	±i¥ò¤å	·s¥_¥«¤­ªÑ°Ï¤­ºÖ¨½±i¥ò¤å	1	1	1968	µLÄÒÄy¤Î¥¼¸g¬FÄÒ±ÀÂË	0	0	1165	0.5764	1	0	2	KMT	1	0.33223696	0.51158921	1.954693298	·s¥_¥«¤­ªÑ°Ï¤­ºÖ¨½
·s¥_¥«¤­ªÑ°Ï¤­ºÖ¨½	¥ô¥ÉÄõ	·s¥_¥«¤­ªÑ°Ï¤­ºÖ¨½¥ô¥ÉÄõ	2	0	1959	µLÄÒÄy¤Î¥¼¸g¬FÄÒ±ÀÂË	0	0	856	0.4235	0	0	2	KMT	1	0.51158921	0.51158921	1.954693298	·s¥_¥«¤­ªÑ°Ï¤­ºÖ¨½
·s¥_¥«¤­ªÑ°Ï¤»ºÖ¨½	³¢¹Å¼Ò	·s¥_¥«¤­ªÑ°Ï¤»ºÖ¨½³¢¹Å¼Ò	1	1	1965	¤¤°ê°ê¥ÁÄÒ	1	0	1638	1	1	0	1	KMT	1	1	1	1	·s¥_¥«¤­ªÑ°Ï¤»ºÖ¨½
·s¥_¥«¤­ªÑ°Ï¤­ªÑ¨½	§õ¨qªâ	·s¥_¥«¤­ªÑ°Ï¤­ªÑ¨½§õ¨qªâ	1	0	1961	µLÄÒÄy¤Î¥¼¸g¬FÄÒ±ÀÂË	0	0	961	0.4299	0	0	2	KMT	1	0.18481401	0.50971401	1.961884469	·s¥_¥«¤­ªÑ°Ï¤­ªÑ¨½
·s¥_¥«¤­ªÑ°Ï¤­ªÑ¨½	³¯¸q»Í	·s¥_¥«¤­ªÑ°Ï¤­ªÑ¨½³¯¸q»Í	2	1	1947	µLÄÒÄy¤Î¥¼¸g¬FÄÒ±ÀÂË	0	0	1274	0.57	1	0	2	KMT	1	0.50971401	0.50971401	1.961884469	·s¥_¥«¤­ªÑ°Ï¤­ªÑ¨½
·s¥_¥«¤­ªÑ°Ï¥Á¸q¨½	³¯¬f¾ì	·s¥_¥«¤­ªÑ°Ï¥Á¸q¨½³¯¬f¾ì	1	1	1967	µLÄÒÄy¤Î¥¼¸g¬FÄÒ±ÀÂË	0	0	699	0.3935	0	0	2	KMT	1	0.15484225	0.52256321	1.913644093	·s¥_¥«¤­ªÑ°Ï¥Á¸q¨½
·s¥_¥«¤­ªÑ°Ï¥Á¸q¨½	³¯²KºÖ	·s¥_¥«¤­ªÑ°Ï¥Á¸q¨½³¯²KºÖ	2	1	1951	¤¤°ê°ê¥ÁÄÒ	1	0	1077	0.6064	1	0	2	KMT	1	0.52256321	0.52256321	1.913644093	·s¥_¥«¤­ªÑ°Ï¥Á¸q¨½
·s¥_¥«¤­ªÑ°Ï¼w­µ¨½	¬xª÷Às	·s¥_¥«¤­ªÑ°Ï¼w­µ¨½¬xª÷Às	1	1	1962	µLÄÒÄy¤Î¥¼¸g¬FÄÒ±ÀÂË	0	0	2473	1	1	0	1	KMT	1	1	1	1	·s¥_¥«¤­ªÑ°Ï¼w­µ¨½
·s¥_¥«¤­ªÑ°Ï¤ô¸P¨½	ªô¦¿¥Ã	·s¥_¥«¤­ªÑ°Ï¤ô¸P¨½ªô¦¿¥Ã	1	1	1957	¤¤°ê°ê¥ÁÄÒ	1	0	2478	0.6388	1	0	2	KMT	1	0.40806544	0.53845865	1.857152819	·s¥_¥«¤­ªÑ°Ï¤ô¸P¨½
·s¥_¥«¤­ªÑ°Ï¤ô¸P¨½	±i¥É¬Â	·s¥_¥«¤­ªÑ°Ï¤ô¸P¨½±i¥É¬Â	2	0	1960	µLÄÒÄy¤Î¥¼¸g¬FÄÒ±ÀÂË	0	0	1401	0.3611	0	0	2	KMT	1	0.53845865	0.53845865	1.857152819	·s¥_¥«¤­ªÑ°Ï¤ô¸P¨½
·s¥_¥«¤­ªÑ°Ï¼w®õ¨½	³¯ªüºø	·s¥_¥«¤­ªÑ°Ï¼w®õ¨½³¯ªüºø	1	0	1963	µLÄÒÄy¤Î¥¼¸g¬FÄÒ±ÀÂË	0	0	1358	0.5722	1	0	2	KMT	1	0.32741284	0.51034013	1.959477496	·s¥_¥«¤­ªÑ°Ï¼w®õ¨½
·s¥_¥«¤­ªÑ°Ï¼w®õ¨½	³\°ê¨}	·s¥_¥«¤­ªÑ°Ï¼w®õ¨½³\°ê¨}	2	1	1962	µLÄÒÄy¤Î¥¼¸g¬FÄÒ±ÀÂË	0	0	1015	0.4277	0	0	2	KMT	1	0.51034013	0.51034013	1.959477496	·s¥_¥«¤­ªÑ°Ï¼w®õ¨½
·s¥_¥«¤­ªÑ°ÏºÖ¼w¨½	§d¥Ã§ø	·s¥_¥«¤­ªÑ°ÏºÖ¼w¨½§d¥Ã§ø	1	1	1963	µLÄÒÄy¤Î¥¼¸g¬FÄÒ±ÀÂË	0	0	1236	1	1	0	1	KMT	1	1	1	1	·s¥_¥«¤­ªÑ°ÏºÖ¼w¨½
·s¥_¥«¤­ªÑ°Ï¶T°Ó¨½	³¯¹Å¥Í	·s¥_¥«¤­ªÑ°Ï¶T°Ó¨½³¯¹Å¥Í	1	1	1954	µLÄÒÄy¤Î¥¼¸g¬FÄÒ±ÀÂË	0	0	683	0.3909	0	0	2	KMT	1	0.15280281	0.52368381	1.909549199	·s¥_¥«¤­ªÑ°Ï¶T°Ó¨½
·s¥_¥«¤­ªÑ°Ï¶T°Ó¨½	À¹¬Ûº³	·s¥_¥«¤­ªÑ°Ï¶T°Ó¨½À¹¬Ûº³	2	1	1961	¤¤°ê°ê¥ÁÄÒ	1	0	1064	0.609	1	0	2	KMT	1	0.52368381	0.52368381	1.909549199	·s¥_¥«¤­ªÑ°Ï¶T°Ó¨½
·s¥_¥«¤­ªÑ°Ï³°¤@¨½	¤ý¶i©M	·s¥_¥«¤­ªÑ°Ï³°¤@¨½¤ý¶i©M	1	1	1971	µLÄÒÄy¤Î¥¼¸g¬FÄÒ±ÀÂË	0	0	493	0.3953	0	0	2	KMT	1	0.15626209	0.52180325	1.916431145	·s¥_¥«¤­ªÑ°Ï³°¤@¨½
·s¥_¥«¤­ªÑ°Ï³°¤@¨½	¦ã°ê²Ð	·s¥_¥«¤­ªÑ°Ï³°¤@¨½¦ã°ê²Ð	2	1	1961	¤¤°ê°ê¥ÁÄÒ	1	0	754	0.6046	1	0	2	KMT	1	0.52180325	0.52180325	1.916431145	·s¥_¥«¤­ªÑ°Ï³°¤@¨½
·s¥_¥«®õ¤s°Ï¤j¬ì¨½	¶Àª÷¶i	·s¥_¥«®õ¤s°Ï¤j¬ì¨½¶Àª÷¶i	1	1	1963	µLÄÒÄy¤Î¥¼¸g¬FÄÒ±ÀÂË	0	0	320	1	1	0	1	KMT	1	1	1	1	·s¥_¥«®õ¤s°Ï¤j¬ì¨½
·s¥_¥«®õ¤s°Ï¾¤©ú¨½	¤ýÄ£àT	·s¥_¥«®õ¤s°Ï¾¤©ú¨½¤ýÄ£àT	1	1	1957	µLÄÒÄy¤Î¥¼¸g¬FÄÒ±ÀÂË	0	0	1698	1	1	0	1	KMT	1	1	1	1	·s¥_¥«®õ¤s°Ï¾¤©ú¨½
·s¥_¥«®õ¤s°Ï¤s¸}¨½	ªL²KºÖ	·s¥_¥«®õ¤s°Ï¤s¸}¨½ªL²KºÖ	1	1	1941	¤¤°ê°ê¥ÁÄÒ	1	0	1493	0.4163	0	0	2	KMT	1	0.17330569	0.51389465	1.945924131	·s¥_¥«®õ¤s°Ï¤s¸}¨½
·s¥_¥«®õ¤s°Ï¤s¸}¨½	¤ý°ê¶W	·s¥_¥«®õ¤s°Ï¤s¸}¨½¤ý°ê¶W	2	1	1953	µLÄÒÄy¤Î¥¼¸g¬FÄÒ±ÀÂË	0	0	2093	0.5836	1	0	2	KMT	1	0.51389465	0.51389465	1.945924131	·s¥_¥«®õ¤s°Ï¤s¸}¨½
·s¥_¥«®õ¤s°ÏºÖ®õ¨½	¬h«ØºÖ	·s¥_¥«®õ¤s°ÏºÖ®õ¨½¬h«ØºÖ	1	1	1958	µLÄÒÄy¤Î¥¼¸g¬FÄÒ±ÀÂË	0	0	1473	1	1	0	1	KMT	1	1	1	1	·s¥_¥«®õ¤s°ÏºÖ®õ¨½
·s¥_¥«®õ¤s°ÏºÖ¿³¨½	³¯©ú¶Q	·s¥_¥«®õ¤s°ÏºÖ¿³¨½³¯©ú¶Q	1	1	1962	µLÄÒÄy¤Î¥¼¸g¬FÄÒ±ÀÂË	0	0	118	0.0557	0	0	3	KMT	1	0.00310249	0.45430894	2.201145326	·s¥_¥«®õ¤s°ÏºÖ¿³¨½
·s¥_¥«®õ¤s°ÏºÖ¿³¨½	³\©v­Z	·s¥_¥«®õ¤s°ÏºÖ¿³¨½³\©v­Z	2	1	1949	µLÄÒÄy¤Î¥¼¸g¬FÄÒ±ÀÂË	0	0	888	0.4194	0	0	3	KMT	1	0.17899885	0.45430894	2.201145326	·s¥_¥«®õ¤s°ÏºÖ¿³¨½
·s¥_¥«®õ¤s°ÏºÖ¿³¨½	±i¥Éµ^	·s¥_¥«®õ¤s°ÏºÖ¿³¨½±i¥Éµ^	3	0	1955	¤¤°ê°ê¥ÁÄÒ	1	0	1111	0.5247	1	0	3	KMT	1	0.45430894	0.45430894	2.201145326	·s¥_¥«®õ¤s°ÏºÖ¿³¨½
·s¥_¥«®õ¤s°Ï·¬¾ð¨½	ªL¤jµ§	·s¥_¥«®õ¤s°Ï·¬¾ð¨½ªL¤jµ§	1	1	1951	µLÄÒÄy¤Î¥¼¸g¬FÄÒ±ÀÂË	0	0	2056	1	1	0	1	KMT	1	1	1	1	·s¥_¥«®õ¤s°Ï·¬¾ð¨½
·s¥_¥«®õ¤s°Ï¦Pºa¨½	­ð¬îª÷	·s¥_¥«®õ¤s°Ï¦Pºa¨½­ð¬îª÷	1	1	1961	µLÄÒÄy¤Î¥¼¸g¬FÄÒ±ÀÂË	0	0	204	0.0837	0	0	3	KMT	1	0.00700569	0.45938259	2.176834782	·s¥_¥«®õ¤s°Ï¦Pºa¨½
·s¥_¥«®õ¤s°Ï¦Pºa¨½	¥j²M½÷	·s¥_¥«®õ¤s°Ï¦Pºa¨½¥j²M½÷	2	1	1943	µLÄÒÄy¤Î¥¼¸g¬FÄÒ±ÀÂË	0	0	1428	0.5859	1	0	3	KMT	1	0.3502845	0.45938259	2.176834782	·s¥_¥«®õ¤s°Ï¦Pºa¨½
·s¥_¥«®õ¤s°Ï¦Pºa¨½	§õ¤¤©M	·s¥_¥«®õ¤s°Ï¦Pºa¨½§õ¤¤©M	3	1	1945	¤¤°ê°ê¥ÁÄÒ	1	0	805	0.3303	0	0	3	KMT	1	0.45938259	0.45938259	2.176834782	·s¥_¥«®õ¤s°Ï¦Pºa¨½
·s¥_¥«®õ¤s°Ï¦P¿³¨½	³\§¡¦À	·s¥_¥«®õ¤s°Ï¦P¿³¨½³\§¡¦À	1	1	1952	¤¤°ê°ê¥ÁÄÒ	1	0	1766	1	1	0	1	KMT	1	1	1	1	·s¥_¥«®õ¤s°Ï¦P¿³¨½
·s¥_¥«®õ¤s°Ï¥þ¿³¨½	»¯¤ì¤s	·s¥_¥«®õ¤s°Ï¥þ¿³¨½»¯¤ì¤s	1	1	1962	µLÄÒÄy¤Î¥¼¸g¬FÄÒ±ÀÂË	0	0	2165	0.5469	1	0	2	KMT	1	0.29909961	0.50430861	1.982912804	·s¥_¥«®õ¤s°Ï¥þ¿³¨½
·s¥_¥«®õ¤s°Ï¥þ¿³¨½	¤ýÄPµ{	·s¥_¥«®õ¤s°Ï¥þ¿³¨½¤ýÄPµ{	2	1	1963	µLÄÒÄy¤Î¥¼¸g¬FÄÒ±ÀÂË	0	0	1793	0.453	0	0	2	KMT	1	0.50430861	0.50430861	1.982912804	·s¥_¥«®õ¤s°Ï¥þ¿³¨½
·s¥_¥«®õ¤s°Ï¸q¾Ç¨½	³¯©Mºa	·s¥_¥«®õ¤s°Ï¸q¾Ç¨½³¯©Mºa	1	1	1960	µLÄÒÄy¤Î¥¼¸g¬FÄÒ±ÀÂË	0	0	2185	1	1	0	1	KMT	1	1	1	1	·s¥_¥«®õ¤s°Ï¸q¾Ç¨½
·s¥_¥«®õ¤s°Ï¸q¤¯¨½	¾H¥¿©ú	·s¥_¥«®õ¤s°Ï¸q¤¯¨½¾H¥¿©ú	1	1	1950	µLÄÒÄy¤Î¥¼¸g¬FÄÒ±ÀÂË	0	0	1868	0.4795	0	0	2	KMT	1	0.22992025	0.50073641	1.997058692	·s¥_¥«®õ¤s°Ï¸q¤¯¨½
·s¥_¥«®õ¤s°Ï¸q¤¯¨½	³\¤õª¢	·s¥_¥«®õ¤s°Ï¸q¤¯¨½³\¤õª¢	2	1	1955	µLÄÒÄy¤Î¥¼¸g¬FÄÒ±ÀÂË	0	0	2027	0.5204	1	0	2	KMT	1	0.50073641	0.50073641	1.997058692	·s¥_¥«®õ¤s°Ï¸q¤¯¨½
·s¥_¥«®õ¤s°Ï©ú§Ó¨½	³¯¬K¬è	·s¥_¥«®õ¤s°Ï©ú§Ó¨½³¯¬K¬è	1	1	1954	µLÄÒÄy¤Î¥¼¸g¬FÄÒ±ÀÂË	0	0	1666	0.7541	1	0	2	KMT	1	0.56866681	0.62908445	1.589611697	·s¥_¥«®õ¤s°Ï©ú§Ó¨½
·s¥_¥«®õ¤s°Ï©ú§Ó¨½	§õ¾ð	·s¥_¥«®õ¤s°Ï©ú§Ó¨½§õ¾ð	2	1	1940	µLÄÒÄy¤Î¥¼¸g¬FÄÒ±ÀÂË	0	0	543	0.2458	0	0	2	KMT	1	0.62908445	0.62908445	1.589611697	·s¥_¥«®õ¤s°Ï©ú§Ó¨½
·s¥_¥«®õ¤s°Ï®õ¤Í¨½	³¯¥úºa	·s¥_¥«®õ¤s°Ï®õ¤Í¨½³¯¥úºa	1	1	1956	¤¤°ê°ê¥ÁÄÒ	1	0	552	0.3942	0	0	2	KMT	1	0.15539364	0.52226613	1.914732629	·s¥_¥«®õ¤s°Ï®õ¤Í¨½
·s¥_¥«®õ¤s°Ï®õ¤Í¨½	?¨Ó©~	·s¥_¥«®õ¤s°Ï®õ¤Í¨½?¨Ó©~	2	1	1951	µLÄÒÄy¤Î¥¼¸g¬FÄÒ±ÀÂË	0	0	848	0.6057	1	0	2	KMT	1	0.52226613	0.52226613	1.914732629	·s¥_¥«®õ¤s°Ï®õ¤Í¨½
·s¥_¥«®õ¤s°Ï·s©ú¨½	§õ°ê¸Î	·s¥_¥«®õ¤s°Ï·s©ú¨½§õ°ê¸Î	1	1	1955	¤¤°ê°ê¥ÁÄÒ	1	0	627	0.2971	0	0	3	KMT	1	0.08826841	0.34247046	2.91995987	·s¥_¥«®õ¤s°Ï·s©ú¨½
·s¥_¥«®õ¤s°Ï·s©ú¨½	§d§õªü±M	·s¥_¥«®õ¤s°Ï·s©ú¨½§d§õªü±M	2	0	1951	µLÄÒÄy¤Î¥¼¸g¬FÄÒ±ÀÂË	0	0	614	0.2909	0	0	3	KMT	1	0.17289122	0.34247046	2.91995987	·s¥_¥«®õ¤s°Ï·s©ú¨½
·s¥_¥«®õ¤s°Ï·s©ú¨½	³¯¤Ð¶Q	·s¥_¥«®õ¤s°Ï·s©ú¨½³¯¤Ð¶Q	3	1	1957	µLÄÒÄy¤Î¥¼¸g¬FÄÒ±ÀÂË	0	0	869	0.4118	1	0	3	KMT	1	0.34247046	0.34247046	2.91995987	·s¥_¥«®õ¤s°Ï·s©ú¨½
·s¥_¥«®õ¤s°Ï¶Q¤l¨½	À¹Áp¾ð	·s¥_¥«®õ¤s°Ï¶Q¤l¨½À¹Áp¾ð	1	1	1957	µLÄÒÄy¤Î¥¼¸g¬FÄÒ±ÀÂË	0	0	1200	0.5206	1	0	2	KMT	1	0.27102436	0.50075285	1.996993127	·s¥_¥«®õ¤s°Ï¶Q¤l¨½
·s¥_¥«®õ¤s°Ï¶Q¤l¨½	§d©ô»ô	·s¥_¥«®õ¤s°Ï¶Q¤l¨½§d©ô»ô	2	1	1950	µLÄÒÄy¤Î¥¼¸g¬FÄÒ±ÀÂË	0	0	1105	0.4793	0	0	2	KMT	1	0.50075285	0.50075285	1.996993127	·s¥_¥«®õ¤s°Ï¶Q¤l¨½
·s¥_¥«®õ¤s°Ï¶Q½å¨½	¯ÎºÖ¼w	·s¥_¥«®õ¤s°Ï¶Q½å¨½¯ÎºÖ¼w	1	1	1950	¤¤°ê°ê¥ÁÄÒ	1	0	1949	1	1	0	1	KMT	1	1	1	1	·s¥_¥«®õ¤s°Ï¶Q½å¨½
·s¥_¥«®õ¤s°Ï¶Q©M¨½	¿cªF©M	·s¥_¥«®õ¤s°Ï¶Q©M¨½¿cªF©M	1	1	1961	µLÄÒÄy¤Î¥¼¸g¬FÄÒ±ÀÂË	0	0	1248	0.4458	0	0	2	KMT	1	0.19873764	0.50576445	1.977205001	·s¥_¥«®õ¤s°Ï¶Q©M¨½
·s¥_¥«®õ¤s°Ï¶Q©M¨½	´å³Õ³Ó	·s¥_¥«®õ¤s°Ï¶Q©M¨½´å³Õ³Ó	2	1	1978	µLÄÒÄy¤Î¥¼¸g¬FÄÒ±ÀÂË	0	0	1551	0.5541	1	0	2	KMT	1	0.50576445	0.50576445	1.977205001	·s¥_¥«®õ¤s°Ï¶Q©M¨½
·s¥_¥«·s²ø°Ï®ü¤s¨½	±i®aºë	·s¥_¥«·s²ø°Ï®ü¤s¨½±i®aºë	1	1	1949	µLÄÒÄy¤Î¥¼¸g¬FÄÒ±ÀÂË	0	0	1751	0.5219	1	0	2	KMT	1	0.27237961	0.50086361	1.996551516	·s¥_¥«·s²ø°Ï®ü¤s¨½
·s¥_¥«·s²ø°Ï®ü¤s¨½	µ£º¡ª÷	·s¥_¥«·s²ø°Ï®ü¤s¨½µ£º¡ª÷	2	0	1964	µLÄÒÄy¤Î¥¼¸g¬FÄÒ±ÀÂË	0	0	1604	0.478	0	0	2	KMT	1	0.50086361	0.50086361	1.996551516	·s¥_¥«·s²ø°Ï®ü¤s¨½
·s¥_¥«·s²ø°Ï¥þ¦w¨½	½²©ú²»	·s¥_¥«·s²ø°Ï¥þ¦w¨½½²©ú²»	1	1	1951	µLÄÒÄy¤Î¥¼¸g¬FÄÒ±ÀÂË	0	0	2445	1	1	0	1	KMT	1	1	1	1	·s¥_¥«·s²ø°Ï¥þ¦w¨½
·s¥_¥«·s²ø°Ï¥þ®õ¨½	³¯­õ­¦	·s¥_¥«·s²ø°Ï¥þ®õ¨½³¯­õ­¦	1	1	1956	¤¤°ê°ê¥ÁÄÒ	1	0	2209	0.6892	1	0	2	KMT	1	0.47499664	0.57153113	1.749685971	·s¥_¥«·s²ø°Ï¥þ®õ¨½
·s¥_¥«·s²ø°Ï¥þ®õ¨½	¸­¨q©y	·s¥_¥«·s²ø°Ï¥þ®õ¨½¸­¨q©y	2	0	1960	µLÄÒÄy¤Î¥¼¸g¬FÄÒ±ÀÂË	0	0	996	0.3107	0	0	2	KMT	1	0.57153113	0.57153113	1.749685971	·s¥_¥«·s²ø°Ï¥þ®õ¨½
·s¥_¥«·s²ø°Ï©¾§µ¨½	¼B¥@¤¯	·s¥_¥«·s²ø°Ï©¾§µ¨½¼B¥@¤¯	1	1	1957	µLÄÒÄy¤Î¥¼¸g¬FÄÒ±ÀÂË	0	0	817	0.3043	0	0	2	KMT	1	0.09259849	0.57645785	1.73473221	·s¥_¥«·s²ø°Ï©¾§µ¨½
·s¥_¥«·s²ø°Ï©¾§µ¨½	ªLªø¤t	·s¥_¥«·s²ø°Ï©¾§µ¨½ªLªø¤t	2	1	1949	µLÄÒÄy¤Î¥¼¸g¬FÄÒ±ÀÂË	0	0	1867	0.6956	1	0	2	KMT	1	0.57645785	0.57645785	1.73473221	·s¥_¥«·s²ø°Ï©¾§µ¨½
·s¥_¥«·s²ø°Ï¤å¿Å¨½	¼B°ê©¾	·s¥_¥«·s²ø°Ï¤å¿Å¨½¼B°ê©¾	1	1	1952	µLÄÒÄy¤Î¥¼¸g¬FÄÒ±ÀÂË	0	0	892	0.6168	1	0	2	KMT	1	0.38044224	0.52720785	1.89678511	·s¥_¥«·s²ø°Ï¤å¿Å¨½
·s¥_¥«·s²ø°Ï¤å¿Å¨½	¤ý¼y¶¶	·s¥_¥«·s²ø°Ï¤å¿Å¨½¤ý¼y¶¶	2	1	1960	¤¤°ê°ê¥ÁÄÒ	1	0	554	0.3831	0	0	2	KMT	1	0.52720785	0.52720785	1.89678511	·s¥_¥«·s²ø°Ï¤å¿Å¨½
·s¥_¥«·s²ø°Ï¤å¸t¨½	³¯®õºa	·s¥_¥«·s²ø°Ï¤å¸t¨½³¯®õºa	1	1	1951	µLÄÒÄy¤Î¥¼¸g¬FÄÒ±ÀÂË	0	0	996	0.4482	0	0	2	KMT	1	0.20088324	0.50525613	1.979194196	·s¥_¥«·s²ø°Ï¤å¸t¨½
·s¥_¥«·s²ø°Ï¤å¸t¨½	½±²Kºa	·s¥_¥«·s²ø°Ï¤å¸t¨½½±²Kºa	2	1	1952	¤¤°ê°ê¥ÁÄÒ	1	0	1226	0.5517	1	0	2	KMT	1	0.50525613	0.50525613	1.979194196	·s¥_¥«·s²ø°Ï¤å¸t¨½
·s¥_¥«·s²ø°Ï¿³º~¨½	Â²©ú¼w	·s¥_¥«·s²ø°Ï¿³º~¨½Â²©ú¼w	1	1	1944	¤¤°ê°ê¥ÁÄÒ	1	0	2040	1	1	0	1	KMT	1	1	1	1	·s¥_¥«·s²ø°Ï¿³º~¨½
·s¥_¥«·s²ø°Ïºa©M¨½	§º·RªÛ	·s¥_¥«·s²ø°Ïºa©M¨½§º·RªÛ	1	0	1955	¤¤°ê°ê¥ÁÄÒ	1	0	765	0.4458	0	0	2	KMT	1	0.19873764	0.50576445	1.977205001	·s¥_¥«·s²ø°Ïºa©M¨½
·s¥_¥«·s²ø°Ïºa©M¨½	¶À§Æ¸q	·s¥_¥«·s²ø°Ïºa©M¨½¶À§Æ¸q	2	1	1952	¤¤°ê°ê¥ÁÄÒ	1	0	951	0.5541	1	0	2	KMT	1	0.50576445	0.50576445	1.977205001	·s¥_¥«·s²ø°Ïºa©M¨½
·s¥_¥«·s²ø°Ï¤å¼w¨½	³¯¶ê¥ú	·s¥_¥«·s²ø°Ï¤å¼w¨½³¯¶ê¥ú	1	1	1958	µLÄÒÄy¤Î¥¼¸g¬FÄÒ±ÀÂË	0	0	924	1	1	0	1	KMT	1	1	1	1	·s¥_¥«·s²ø°Ï¤å¼w¨½
·s¥_¥«·s²ø°Ï¤å©ú¨½	³s«Ø±j	·s¥_¥«·s²ø°Ï¤å©ú¨½³s«Ø±j	1	1	1972	µLÄÒÄy¤Î¥¼¸g¬FÄÒ±ÀÂË	0	0	161	0.1234	0	0	3	KMT	1	0.01522756	0.40157813	2.490175449	·s¥_¥«·s²ø°Ï¤å©ú¨½
·s¥_¥«·s²ø°Ï¤å©ú¨½	®}³Ó¨k	·s¥_¥«·s²ø°Ï¤å©ú¨½®}³Ó¨k	2	1	1938	¤¤°ê°ê¥ÁÄÒ	1	0	615	0.4716	1	0	3	KMT	1	0.23763412	0.40157813	2.490175449	·s¥_¥«·s²ø°Ï¤å©ú¨½
·s¥_¥«·s²ø°Ï¤å©ú¨½	±iÃQ¬Kªá	·s¥_¥«·s²ø°Ï¤å©ú¨½±iÃQ¬Kªá	3	0	1953	µLÄÒÄy¤Î¥¼¸g¬FÄÒ±ÀÂË	0	0	528	0.4049	0	0	3	KMT	1	0.40157813	0.40157813	2.490175449	·s¥_¥«·s²ø°Ï¤å©ú¨½
·s¥_¥«·s²ø°Ï¤Æ¦¨¨½	³¯ªL¨qªá	·s¥_¥«·s²ø°Ï¤Æ¦¨¨½³¯ªL¨qªá	1	0	1943	µLÄÒÄy¤Î¥¼¸g¬FÄÒ±ÀÂË	0	0	1517	1	1	0	1	KMT	1	1	1	1	·s¥_¥«·s²ø°Ï¤Æ¦¨¨½
·s¥_¥«·s²ø°ÏÀY«e¨½	¸­«Ø§»	·s¥_¥«·s²ø°ÏÀY«e¨½¸­«Ø§»	1	1	1950	µLÄÒÄy¤Î¥¼¸g¬FÄÒ±ÀÂË	0	0	2002	1	1	0	1	KMT	1	1	1	1	·s¥_¥«·s²ø°ÏÀY«e¨½
·s¥_¥«·s²ø°ÏºÖ°ò¨½	¤ýÂ`½÷	·s¥_¥«·s²ø°ÏºÖ°ò¨½¤ýÂ`½÷	1	1	1969	µLÄÒÄy¤Î¥¼¸g¬FÄÒ±ÀÂË	0	0	1338	1	1	0	1	KMT	1	1	1	1	·s¥_¥«·s²ø°ÏºÖ°ò¨½
·s¥_¥«·s²ø°ÏºÖ¿³¨½	³¯§»¹F	·s¥_¥«·s²ø°ÏºÖ¿³¨½³¯§»¹F	1	1	1952	µLÄÒÄy¤Î¥¼¸g¬FÄÒ±ÀÂË	0	0	1359	0.4646	0	0	2	KMT	1	0.21585316	0.50239925	1.990448831	·s¥_¥«·s²ø°ÏºÖ¿³¨½
·s¥_¥«·s²ø°ÏºÖ¿³¨½	Ã¹²Ó©ú	·s¥_¥«·s²ø°ÏºÖ¿³¨½Ã¹²Ó©ú	2	1	1961	µLÄÒÄy¤Î¥¼¸g¬FÄÒ±ÀÂË	0	0	1566	0.5353	1	0	2	KMT	1	0.50239925	0.50239925	1.990448831	·s¥_¥«·s²ø°ÏºÖ¿³¨½
·s¥_¥«·s²ø°Ï©÷¥­¨½	³¯¸U­«	·s¥_¥«·s²ø°Ï©÷¥­¨½³¯¸U­«	1	1	1951	¥Á¥D¶i¨BÄÒ	0	1	547	0.2471	0	0	3	KMT	1	0.06105841	0.44518246	2.24626999	·s¥_¥«·s²ø°Ï©÷¥­¨½
·s¥_¥«·s²ø°Ï©÷¥­¨½	³¯¼w©ú	·s¥_¥«·s²ø°Ï©÷¥­¨½³¯¼w©ú	2	1	1960	¤¤°ê°ê¥ÁÄÒ	1	0	1330	0.6009	1	0	3	KMT	1	0.42213922	0.44518246	2.24626999	·s¥_¥«·s²ø°Ï©÷¥­¨½
·s¥_¥«·s²ø°Ï©÷¥­¨½	ÂÅ¥É»ñ	·s¥_¥«·s²ø°Ï©÷¥­¨½ÂÅ¥É»ñ	3	0	1945	µLÄÒÄy¤Î¥¼¸g¬FÄÒ±ÀÂË	0	0	336	0.1518	0	0	3	KMT	1	0.44518246	0.44518246	2.24626999	·s¥_¥«·s²ø°Ï©÷¥­¨½
·s¥_¥«·s²ø°Ï©M¥­¨½	§d³ÍÝõ	·s¥_¥«·s²ø°Ï©M¥­¨½§d³ÍÝõ	1	0	1961	µLÄÒÄy¤Î¥¼¸g¬FÄÒ±ÀÂË	0	0	1420	0.4858	0	0	2	KMT	1	0.23600164	0.50030045	1.998798922	·s¥_¥«·s²ø°Ï©M¥­¨½
·s¥_¥«·s²ø°Ï©M¥­¨½	½²ªe±l	·s¥_¥«·s²ø°Ï©M¥­¨½½²ªe±l	2	1	1952	¥Á¥D¶i¨BÄÒ	0	1	1503	0.5141	1	0	2	KMT	1	0.50030045	0.50030045	1.998798922	·s¥_¥«·s²ø°Ï©M¥­¨½
·s¥_¥«·s²ø°Ï©¯ºÖ¨½	¶À¸WÖp	·s¥_¥«·s²ø°Ï©¯ºÖ¨½¶À¸WÖp	1	1	1951	¥Á¥D¶i¨BÄÒ	0	1	1446	0.551	1	0	2	KMT	1	0.303601	0.50511221	1.979758121	·s¥_¥«·s²ø°Ï©¯ºÖ¨½
·s¥_¥«·s²ø°Ï©¯ºÖ¨½	³¯¬±±X	·s¥_¥«·s²ø°Ï©¯ºÖ¨½³¯¬±±X	2	1	1956	¤¤°ê°ê¥ÁÄÒ	1	0	1178	0.4489	0	0	2	KMT	1	0.50511221	0.50511221	1.979758121	·s¥_¥«·s²ø°Ï©¯ºÖ¨½
·s¥_¥«·s²ø°Ï©÷¶©¨½	§d¯à³q	·s¥_¥«·s²ø°Ï©÷¶©¨½§d¯à³q	1	1	1939	µLÄÒÄy¤Î¥¼¸g¬FÄÒ±ÀÂË	0	0	1966	1	1	0	1	KMT	1	1	1	1	·s¥_¥«·s²ø°Ï©÷¶©¨½
·s¥_¥«·s²ø°Ï«H¸q¨½	§d¬î®Û	·s¥_¥«·s²ø°Ï«H¸q¨½§d¬î®Û	1	0	1964	µLÄÒÄy¤Î¥¼¸g¬FÄÒ±ÀÂË	0	0	2214	0.6365	1	0	2	KMT	1	0.40513225	0.53719181	1.861532476	·s¥_¥«·s²ø°Ï«H¸q¨½
·s¥_¥«·s²ø°Ï«H¸q¨½	½²¤gµo	·s¥_¥«·s²ø°Ï«H¸q¨½½²¤gµo	2	1	1953	¤¤°ê°ê¥ÁÄÒ	1	0	1264	0.3634	0	0	2	KMT	1	0.53719181	0.53719181	1.861532476	·s¥_¥«·s²ø°Ï«H¸q¨½
·s¥_¥«·s²ø°Ï©÷«H¨½	§dÄRµØ	·s¥_¥«·s²ø°Ï©÷«H¨½§dÄRµØ	1	0	1963	µLÄÒÄy¤Î¥¼¸g¬FÄÒ±ÀÂË	0	0	893	0.4234	0	0	2	KMT	1	0.17926756	0.51161981	1.954576387	·s¥_¥«·s²ø°Ï©÷«H¨½
·s¥_¥«·s²ø°Ï©÷«H¨½	¬_©ú±Ò	·s¥_¥«·s²ø°Ï©÷«H¨½¬_©ú±Ò	2	1	1963	¤¤°ê°ê¥ÁÄÒ	1	0	1216	0.5765	1	0	2	KMT	1	0.51161981	0.51161981	1.954576387	·s¥_¥«·s²ø°Ï©÷«H¨½
·s¥_¥«·s²ø°Ï©÷©ú¨½	¦¿­Z¶©	·s¥_¥«·s²ø°Ï©÷©ú¨½¦¿­Z¶©	1	1	1947	µLÄÒÄy¤Î¥¼¸g¬FÄÒ±ÀÂË	0	0	805	0.3804	0	0	2	KMT	1	0.14470416	0.52848441	1.892203405	·s¥_¥«·s²ø°Ï©÷©ú¨½
·s¥_¥«·s²ø°Ï©÷©ú¨½	§d¬î±ö	·s¥_¥«·s²ø°Ï©÷©ú¨½§d¬î±ö	2	0	1959	µLÄÒÄy¤Î¥¼¸g¬FÄÒ±ÀÂË	0	0	1311	0.6195	1	0	2	KMT	1	0.52848441	0.52848441	1.892203405	·s¥_¥«·s²ø°Ï©÷©ú¨½
·s¥_¥«·s²ø°Ï¤¯¸q¨½	³¯´_¿³	·s¥_¥«·s²ø°Ï¤¯¸q¨½³¯´_¿³	1	1	1962	¥Á¥D¶i¨BÄÒ	0	1	1335	0.5989	1	0	2	KMT	1	0.35868121	0.51948221	1.924993736	·s¥_¥«·s²ø°Ï¤¯¸q¨½
·s¥_¥«·s²ø°Ï¤¯¸q¨½	¶ÀªøºÖ	·s¥_¥«·s²ø°Ï¤¯¸q¨½¶ÀªøºÖ	2	1	1947	¤¤°ê°ê¥ÁÄÒ	1	0	894	0.401	0	0	2	KMT	1	0.51948221	0.51948221	1.924993736	·s¥_¥«·s²ø°Ï¤¯¸q¨½
·s¥_¥«·s²ø°Ï¤¯·R¨½	§d«TÁn	·s¥_¥«·s²ø°Ï¤¯·R¨½§d«TÁn	1	1	1970	¤¤°ê°ê¥ÁÄÒ	1	0	1551	1	1	0	1	KMT	1	1	1	1	·s¥_¥«·s²ø°Ï¤¯·R¨½
·s¥_¥«·s²ø°Ï¦Û«H¨½	¼B´Â±d	·s¥_¥«·s²ø°Ï¦Û«H¨½¼B´Â±d	1	1	1963	µLÄÒÄy¤Î¥¼¸g¬FÄÒ±ÀÂË	0	0	1321	1	1	0	1	KMT	1	1	1	1	·s¥_¥«·s²ø°Ï¦Û«H¨½
·s¥_¥«·s²ø°Ï¦Û¥ß¨½	§dªF§ü	·s¥_¥«·s²ø°Ï¦Û¥ß¨½§dªF§ü	1	1	1951	¤¤°ê°ê¥ÁÄÒ	1	0	2538	1	1	0	1	KMT	1	1	1	1	·s¥_¥«·s²ø°Ï¦Û¥ß¨½
·s¥_¥«·s²ø°Ï¦Û±j¨½	¶ÀºaµØ	·s¥_¥«·s²ø°Ï¦Û±j¨½¶ÀºaµØ	1	1	1948	µLÄÒÄy¤Î¥¼¸g¬FÄÒ±ÀÂË	0	0	1316	1	1	0	1	KMT	1	1	1	1	·s¥_¥«·s²ø°Ï¦Û±j¨½
·s¥_¥«·s²ø°Ï«ä·½¨½	±ç²Q¬ü	·s¥_¥«·s²ø°Ï«ä·½¨½±ç²Q¬ü	1	0	1965	µLÄÒÄy¤Î¥¼¸g¬FÄÒ±ÀÂË	0	0	885	0.2752	0	0	3	KMT	1	0.07573504	0.38301794	2.610843764	·s¥_¥«·s²ø°Ï«ä·½¨½
·s¥_¥«·s²ø°Ï«ä·½¨½	³¯©ú¨}	·s¥_¥«·s²ø°Ï«ä·½¨½³¯©ú¨}	2	1	1951	¤¤°ê°ê¥ÁÄÒ	1	0	684	0.2127	0	0	3	KMT	1	0.12097633	0.38301794	2.610843764	·s¥_¥«·s²ø°Ï«ä·½¨½
·s¥_¥«·s²ø°Ï«ä·½¨½	¨H©úÄ£	·s¥_¥«·s²ø°Ï«ä·½¨½¨H©úÄ£	3	1	1956	¥Á¥D¶i¨BÄÒ	0	1	1646	0.5119	1	0	3	KMT	1	0.38301794	0.38301794	2.610843764	·s¥_¥«·s²ø°Ï«ä·½¨½
·s¥_¥«·s²ø°Ï«ä½å¨½	¨ô­ZªQ	·s¥_¥«·s²ø°Ï«ä½å¨½¨ô­ZªQ	1	1	1945	µLÄÒÄy¤Î¥¼¸g¬FÄÒ±ÀÂË	0	0	2107	1	1	0	1	KMT	1	1	1	1	·s¥_¥«·s²ø°Ï«ä½å¨½
·s¥_¥«·s²ø°Ï¤¤µØ¨½	³¯·qªi	·s¥_¥«·s²ø°Ï¤¤µØ¨½³¯·qªi	1	1	1963	µLÄÒÄy¤Î¥¼¸g¬FÄÒ±ÀÂË	0	0	1055	0.6452	1	0	2	KMT	1	0.41628304	0.54209513	1.844694676	·s¥_¥«·s²ø°Ï¤¤µØ¨½
·s¥_¥«·s²ø°Ï¤¤µØ¨½	¤B°ö·½	·s¥_¥«·s²ø°Ï¤¤µØ¨½¤B°ö·½	2	1	1951	µLÄÒÄy¤Î¥¼¸g¬FÄÒ±ÀÂË	0	0	580	0.3547	0	0	2	KMT	1	0.54209513	0.54209513	1.844694676	·s¥_¥«·s²ø°Ï¤¤µØ¨½
·s¥_¥«·s²ø°Ï¤¤¬ü¨½	·¨¬Ò±o	·s¥_¥«·s²ø°Ï¤¤¬ü¨½·¨¬Ò±o	1	1	1950	µLÄÒÄy¤Î¥¼¸g¬FÄÒ±ÀÂË	0	0	1538	0.4422	0	0	2	KMT	1	0.19554084	0.50657013	1.974060334	·s¥_¥«·s²ø°Ï¤¤¬ü¨½
·s¥_¥«·s²ø°Ï¤¤¬ü¨½	³¯©ú­ë	·s¥_¥«·s²ø°Ï¤¤¬ü¨½³¯©ú­ë	2	1	1962	¥Á¥D¶i¨BÄÒ	0	1	1940	0.5577	1	0	2	KMT	1	0.50657013	0.50657013	1.974060334	·s¥_¥«·s²ø°Ï¤¤¬ü¨½
·s¥_¥«·s²ø°Ï«í¦w¨½	½²³¯ùÚµâ	·s¥_¥«·s²ø°Ï«í¦w¨½½²³¯ùÚµâ	1	0	1957	µLÄÒÄy¤Î¥¼¸g¬FÄÒ±ÀÂË	0	0	1444	0.5562	1	0	3	KMT	1	0.30935844	0.44998841	2.222279458	·s¥_¥«·s²ø°Ï«í¦w¨½
·s¥_¥«·s²ø°Ï«í¦w¨½	³¯«T¨q	·s¥_¥«·s²ø°Ï«í¦w¨½³¯«T¨q	2	1	1942	µLÄÒÄy¤Î¥¼¸g¬FÄÒ±ÀÂË	0	0	953	0.3671	0	0	3	KMT	1	0.44412085	0.44998841	2.222279458	·s¥_¥«·s²ø°Ï«í¦w¨½
·s¥_¥«·s²ø°Ï«í¦w¨½	§õ¾|±ö	·s¥_¥«·s²ø°Ï«í¦w¨½§õ¾|±ö	3	0	1962	µLÄÒÄy¤Î¥¼¸g¬FÄÒ±ÀÂË	0	0	199	0.0766	0	0	3	KMT	1	0.44998841	0.44998841	2.222279458	·s¥_¥«·s²ø°Ï«í¦w¨½
·s¥_¥«·s²ø°Ï¥ß¤H¨½	³¯¨q¶¯	·s¥_¥«·s²ø°Ï¥ß¤H¨½³¯¨q¶¯	1	1	1939	¤¤°ê°ê¥ÁÄÒ	1	0	1094	1	1	0	1	KMT	1	1	1	1	·s¥_¥«·s²ø°Ï¥ß¤H¨½
·s¥_¥«·s²ø°Ï¥ß¼w¨½	ªLÀé°ó	·s¥_¥«·s²ø°Ï¥ß¼w¨½ªLÀé°ó	1	1	1952	µLÄÒÄy¤Î¥¼¸g¬FÄÒ±ÀÂË	0	0	613	0.3661	0	0	3	KMT	1	0.13402921	0.3449987	2.898561647	·s¥_¥«·s²ø°Ï¥ß¼w¨½
·s¥_¥«·s²ø°Ï¥ß¼w¨½	³¯¥É³¹	·s¥_¥«·s²ø°Ï¥ß¼w¨½³¯¥É³¹	2	1	1969	µLÄÒÄy¤Î¥¼¸g¬FÄÒ±ÀÂË	0	0	411	0.2455	0	0	3	KMT	1	0.19429946	0.3449987	2.898561647	·s¥_¥«·s²ø°Ï¥ß¼w¨½
·s¥_¥«·s²ø°Ï¥ß¼w¨½	²ø¥É¶³	·s¥_¥«·s²ø°Ï¥ß¼w¨½²ø¥É¶³	3	0	1959	¤¤°ê°ê¥ÁÄÒ	1	0	650	0.3882	1	0	3	KMT	1	0.3449987	0.3449987	2.898561647	·s¥_¥«·s²ø°Ï¥ß¼w¨½
·s¥_¥«·s²ø°Ï¤¤©M¨½	ªL©sÂE	·s¥_¥«·s²ø°Ï¤¤©M¨½ªL©sÂE	1	1	1977	µLÄÒÄy¤Î¥¼¸g¬FÄÒ±ÀÂË	0	0	1820	0.5853	1	0	2	KMT	1	0.34257609	0.51446925	1.943750768	·s¥_¥«·s²ø°Ï¤¤©M¨½
·s¥_¥«·s²ø°Ï¤¤©M¨½	¾G§öºØ	·s¥_¥«·s²ø°Ï¤¤©M¨½¾G§öºØ	2	0	1953	¥Á¥D¶i¨BÄÒ	0	1	1289	0.4146	0	0	2	KMT	1	0.51446925	0.51446925	1.943750768	·s¥_¥«·s²ø°Ï¤¤©M¨½
·s¥_¥«·s²ø°Ï¤¤®õ¨½	³¢¾ðµY	·s¥_¥«·s²ø°Ï¤¤®õ¨½³¢¾ðµY	1	1	1958	¤¤°ê°ê¥ÁÄÒ	1	0	2304	1	1	0	1	KMT	1	1	1	1	·s¥_¥«·s²ø°Ï¤¤®õ¨½
·s¥_¥«·s²ø°Ï¤¤§»¨½	¬x¤Ö´Ü	·s¥_¥«·s²ø°Ï¤¤§»¨½¬x¤Ö´Ü	1	1	1952	µLÄÒÄy¤Î¥¼¸g¬FÄÒ±ÀÂË	0	0	1710	1	1	0	1	KMT	1	1	1	1	·s¥_¥«·s²ø°Ï¤¤§»¨½
·s¥_¥«·s²ø°Ï¤¤¥þ¨½	³¯¬f§Ê	·s¥_¥«·s²ø°Ï¤¤¥þ¨½³¯¬f§Ê	1	1	1962	µLÄÒÄy¤Î¥¼¸g¬FÄÒ±ÀÂË	0	0	1869	1	1	0	1	KMT	1	1	1	1	·s¥_¥«·s²ø°Ï¤¤¥þ¨½
·s¥_¥«·s²ø°Ï¥ß§Ó¨½	³¯±X²»	·s¥_¥«·s²ø°Ï¥ß§Ó¨½³¯±X²»	1	1	1943	µLÄÒÄy¤Î¥¼¸g¬FÄÒ±ÀÂË	0	0	1491	0.6133	1	0	2	KMT	1	0.37613689	0.52559645	1.90260037	·s¥_¥«·s²ø°Ï¥ß§Ó¨½
·s¥_¥«·s²ø°Ï¥ß§Ó¨½	¬I¬ü®S	·s¥_¥«·s²ø°Ï¥ß§Ó¨½¬I¬ü®S	2	0	1967	µLÄÒÄy¤Î¥¼¸g¬FÄÒ±ÀÂË	0	0	940	0.3866	0	0	2	KMT	1	0.52559645	0.52559645	1.90260037	·s¥_¥«·s²ø°Ï¥ß§Ó¨½
·s¥_¥«·s²ø°Ï¥ß§Ê¨½	³\ÂEÅï	·s¥_¥«·s²ø°Ï¥ß§Ê¨½³\ÂEÅï	1	1	1954	µLÄÒÄy¤Î¥¼¸g¬FÄÒ±ÀÂË	0	0	4364	1	1	0	1	KMT	1	1	1	1	·s¥_¥«·s²ø°Ï¥ß§Ê¨½
·s¥_¥«·s²ø°Ï¥ß°ò¨½	±i¤¤­s	·s¥_¥«·s²ø°Ï¥ß°ò¨½±i¤¤­s	1	0	1957	µLÄÒÄy¤Î¥¼¸g¬FÄÒ±ÀÂË	0	0	2310	0.6137	1	0	2	KMT	1	0.37662769	0.52577813	1.901942936	·s¥_¥«·s²ø°Ï¥ß°ò¨½
·s¥_¥«·s²ø°Ï¥ß°ò¨½	¼B³s³¹	·s¥_¥«·s²ø°Ï¥ß°ò¨½¼B³s³¹	2	1	1947	µLÄÒÄy¤Î¥¼¸g¬FÄÒ±ÀÂË	0	0	1454	0.3862	0	0	2	KMT	1	0.52577813	0.52577813	1.901942936	·s¥_¥«·s²ø°Ï¥ß°ò¨½
·s¥_¥«·s²ø°Ï¤¤¸Û¨½	³¯Á§¨qÆ}	·s¥_¥«·s²ø°Ï¤¤¸Û¨½³¯Á§¨qÆ}	1	0	1955	µLÄÒÄy¤Î¥¼¸g¬FÄÒ±ÀÂË	0	0	580	0.4087	0	0	2	KMT	1	0.16703569	0.51655313	1.935909284	·s¥_¥«·s²ø°Ï¤¤¸Û¨½
·s¥_¥«·s²ø°Ï¤¤¸Û¨½	¨H¤B¤l	·s¥_¥«·s²ø°Ï¤¤¸Û¨½¨H¤B¤l	2	1	1952	µLÄÒÄy¤Î¥¼¸g¬FÄÒ±ÀÂË	0	0	839	0.5912	1	0	2	KMT	1	0.51655313	0.51655313	1.935909284	·s¥_¥«·s²ø°Ï¤¤¸Û¨½
·s¥_¥«·s²ø°Ï¤¤´ä¨½	³\»AµØ	·s¥_¥«·s²ø°Ï¤¤´ä¨½³\»AµØ	1	0	1956	¤¤°ê°ê¥ÁÄÒ	1	0	2942	1	1	0	1	KMT	1	1	1	1	·s¥_¥«·s²ø°Ï¤¤´ä¨½
·s¥_¥«·s²ø°Ï¤¤«H¨½	ªLªü¤¸	·s¥_¥«·s²ø°Ï¤¤«H¨½ªLªü¤¸	1	1	1957	µLÄÒÄy¤Î¥¼¸g¬FÄÒ±ÀÂË	0	0	3765	1	1	0	1	KMT	1	1	1	1	·s¥_¥«·s²ø°Ï¤¤«H¨½
·s¥_¥«·s²ø°Ï¤¤¥­¨½	¾d¥x¿³	·s¥_¥«·s²ø°Ï¤¤¥­¨½¾d¥x¿³	1	1	1965	µLÄÒÄy¤Î¥¼¸g¬FÄÒ±ÀÂË	0	0	2349	0.5805	1	0	3	KMT	1	0.33698025	0.4568657	2.188827045	·s¥_¥«·s²ø°Ï¤¤¥­¨½
·s¥_¥«·s²ø°Ï¤¤¥­¨½	§L©v¾Ë	·s¥_¥«·s²ø°Ï¤¤¥­¨½§L©v¾Ë	2	1	1960	µLÄÒÄy¤Î¥¼¸g¬FÄÒ±ÀÂË	0	0	1360	0.3361	0	0	3	KMT	1	0.44994346	0.4568657	2.188827045	·s¥_¥«·s²ø°Ï¤¤¥­¨½
·s¥_¥«·s²ø°Ï¤¤¥­¨½	ªL¦è¥Ð	·s¥_¥«·s²ø°Ï¤¤¥­¨½ªL¦è¥Ð	3	1	1944	µLÄÒÄy¤Î¥¼¸g¬FÄÒ±ÀÂË	0	0	337	0.0832	0	0	3	KMT	1	0.4568657	0.4568657	2.188827045	·s¥_¥«·s²ø°Ï¤¤¥­¨½
·s¥_¥«·s²ø°Ï¤¤­ì¨½	§d¥ÉùÛ	·s¥_¥«·s²ø°Ï¤¤­ì¨½§d¥ÉùÛ	1	0	1967	µLÄÒÄy¤Î¥¼¸g¬FÄÒ±ÀÂË	0	0	1420	0.2764	0	0	3	KMT	1	0.07639696	0.33937172	2.94662148	·s¥_¥«·s²ø°Ï¤¤­ì¨½
·s¥_¥«·s²ø°Ï¤¤­ì¨½	Ä¬¤åµØ	·s¥_¥«·s²ø°Ï¤¤­ì¨½Ä¬¤åµØ	2	1	1963	µLÄÒÄy¤Î¥¼¸g¬FÄÒ±ÀÂË	0	0	1990	0.3874	1	0	3	KMT	1	0.22647572	0.33937172	2.94662148	·s¥_¥«·s²ø°Ï¤¤­ì¨½
·s¥_¥«·s²ø°Ï¤¤­ì¨½	»¯«i¦¨	·s¥_¥«·s²ø°Ï¤¤­ì¨½»¯«i¦¨	3	1	1951	µLÄÒÄy¤Î¥¼¸g¬FÄÒ±ÀÂË	0	0	1726	0.336	0	0	3	KMT	1	0.33937172	0.33937172	2.94662148	·s¥_¥«·s²ø°Ï¤¤­ì¨½
·s¥_¥«·s²ø°Ï¤¤¶©¨½	§d²M¼Ð	·s¥_¥«·s²ø°Ï¤¤¶©¨½§d²M¼Ð	1	1	1956	µLÄÒÄy¤Î¥¼¸g¬FÄÒ±ÀÂË	0	0	1992	1	1	0	1	KMT	1	1	1	1	·s¥_¥«·s²ø°Ï¤¤¶©¨½
·s¥_¥«·s²ø°Ï¥ß¥\¨½	³¯©ö¿A	·s¥_¥«·s²ø°Ï¥ß¥\¨½³¯©ö¿A	1	1	1975	µLÄÒÄy¤Î¥¼¸g¬FÄÒ±ÀÂË	0	0	1335	0.5845	1	0	2	KMT	1	0.34164025	0.51419741	1.944778368	·s¥_¥«·s²ø°Ï¥ß¥\¨½
·s¥_¥«·s²ø°Ï¥ß¥\¨½	¬ö®¶¶¶	·s¥_¥«·s²ø°Ï¥ß¥\¨½¬ö®¶¶¶	2	1	1958	µLÄÒÄy¤Î¥¼¸g¬FÄÒ±ÀÂË	0	0	949	0.4154	0	0	2	KMT	1	0.51419741	0.51419741	1.944778368	·s¥_¥«·s²ø°Ï¥ß¥\¨½
·s¥_¥«·s²ø°Ï¥ß®õ¨½	³\¤å³¹	·s¥_¥«·s²ø°Ï¥ß®õ¨½³\¤å³¹	1	1	1956	µLÄÒÄy¤Î¥¼¸g¬FÄÒ±ÀÂË	0	0	1555	0.5533	1	0	2	KMT	1	0.30614089	0.50559245	1.977877636	·s¥_¥«·s²ø°Ï¥ß®õ¨½
·s¥_¥«·s²ø°Ï¥ß®õ¨½	½²¤å²»	·s¥_¥«·s²ø°Ï¥ß®õ¨½½²¤å²»	2	1	1955	¤¤°ê°ê¥ÁÄÒ	1	0	1255	0.4466	0	0	2	KMT	1	0.50559245	0.50559245	1.977877636	·s¥_¥«·s²ø°Ï¥ß®õ¨½
·s¥_¥«·s²ø°Ï¥ß¨¥¨½	¼B¶i¯q	·s¥_¥«·s²ø°Ï¥ß¨¥¨½¼B¶i¯q	1	1	1956	µLÄÒÄy¤Î¥¼¸g¬FÄÒ±ÀÂË	0	0	1860	0.5984	1	0	2	KMT	1	0.35808256	0.51928481	1.925725499	·s¥_¥«·s²ø°Ï¥ß¨¥¨½
·s¥_¥«·s²ø°Ï¥ß¨¥¨½	¶À­Z²W	·s¥_¥«·s²ø°Ï¥ß¨¥¨½¶À­Z²W	2	1	1946	µLÄÒÄy¤Î¥¼¸g¬FÄÒ±ÀÂË	0	0	1248	0.4015	0	0	2	KMT	1	0.51928481	0.51928481	1.925725499	·s¥_¥«·s²ø°Ï¥ß¨¥¨½
·s¥_¥«·s²ø°ÏÂ×¦~¨½	¿½Â×¸Î	·s¥_¥«·s²ø°ÏÂ×¦~¨½¿½Â×¸Î	1	1	1956	µLÄÒÄy¤Î¥¼¸g¬FÄÒ±ÀÂË	0	0	986	0.4349	1	0	3	KMT	1	0.18913801	0.38267626	2.613174907	·s¥_¥«·s²ø°ÏÂ×¦~¨½
·s¥_¥«·s²ø°ÏÂ×¦~¨½	¹ù¤Ñ½ç	·s¥_¥«·s²ø°ÏÂ×¦~¨½¹ù¤Ñ½ç	2	1	1952	µLÄÒÄy¤Î¥¼¸g¬FÄÒ±ÀÂË	0	0	936	0.4128	0	0	3	KMT	1	0.35954185	0.38267626	2.613174907	·s¥_¥«·s²ø°ÏÂ×¦~¨½
·s¥_¥«·s²ø°ÏÂ×¦~¨½	¾G¨q®Z	·s¥_¥«·s²ø°ÏÂ×¦~¨½¾G¨q®Z	3	0	1959	µLÄÒÄy¤Î¥¼¸g¬FÄÒ±ÀÂË	0	0	345	0.1521	0	0	3	KMT	1	0.38267626	0.38267626	2.613174907	·s¥_¥«·s²ø°ÏÂ×¦~¨½
·s¥_¥«·s²ø°Ï°ê®õ¨½	³¯ª÷°®	·s¥_¥«·s²ø°Ï°ê®õ¨½³¯ª÷°®	1	1	1944	µLÄÒÄy¤Î¥¼¸g¬FÄÒ±ÀÂË	0	0	877	1	1	0	1	KMT	1	1	1	1	·s¥_¥«·s²ø°Ï°ê®õ¨½
·s¥_¥«·s²ø°Ï®õÂ×¨½	ªL¥É®S	·s¥_¥«·s²ø°Ï®õÂ×¨½ªL¥É®S	1	0	1958	µLÄÒÄy¤Î¥¼¸g¬FÄÒ±ÀÂË	0	0	1232	1	1	0	1	KMT	1	1	1	1	·s¥_¥«·s²ø°Ï®õÂ×¨½
·s¥_¥«·s²ø°ÏÃ£ªL¨½	±i°®¶©	·s¥_¥«·s²ø°ÏÃ£ªL¨½±i°®¶©	1	1	1959	µLÄÒÄy¤Î¥¼¸g¬FÄÒ±ÀÂË	0	0	1829	0.5335	1	0	2	KMT	1	0.28462225	0.50215121	1.991432023	·s¥_¥«·s²ø°ÏÃ£ªL¨½
·s¥_¥«·s²ø°ÏÃ£ªL¨½	Ä¬ªF©ú	·s¥_¥«·s²ø°ÏÃ£ªL¨½Ä¬ªF©ú	2	1	1956	µLÄÒÄy¤Î¥¼¸g¬FÄÒ±ÀÂË	0	0	1599	0.4664	0	0	2	KMT	1	0.50215121	0.50215121	1.991432023	·s¥_¥«·s²ø°ÏÃ£ªL¨½
·s¥_¥«·s²ø°ÏºÖÀç¨½	¹ù¬Ó·½	·s¥_¥«·s²ø°ÏºÖÀç¨½¹ù¬Ó·½	1	1	1948	µLÄÒÄy¤Î¥¼¸g¬FÄÒ±ÀÂË	0	0	1192	1	1	0	1	KMT	1	1	1	1	·s¥_¥«·s²ø°ÏºÖÀç¨½
·s¥_¥«·s²ø°ÏÀç½L¨½	®}®Ú¦b	·s¥_¥«·s²ø°ÏÀç½L¨½®}®Ú¦b	1	1	1952	µLÄÒÄy¤Î¥¼¸g¬FÄÒ±ÀÂË	0	0	754	0.476	0	0	2	KMT	1	0.226576	0.50104721	1.995819915	·s¥_¥«·s²ø°ÏÀç½L¨½
·s¥_¥«·s²ø°ÏÀç½L¨½	ªL©v·u	·s¥_¥«·s²ø°ÏÀç½L¨½ªL©v·u	2	1	1968	µLÄÒÄy¤Î¥¼¸g¬FÄÒ±ÀÂË	0	0	830	0.5239	1	0	2	KMT	1	0.50104721	0.50104721	1.995819915	·s¥_¥«·s²ø°ÏÀç½L¨½
·s¥_¥«·s²ø°Ï¤¦»ñ¨½	¸­«T¥Í	·s¥_¥«·s²ø°Ï¤¦»ñ¨½¸­«T¥Í	1	1	1958	µLÄÒÄy¤Î¥¼¸g¬FÄÒ±ÀÂË	0	0	1868	0.4768	0	0	2	KMT	1	0.22733824	0.50097185	1.996120141	·s¥_¥«·s²ø°Ï¤¦»ñ¨½
·s¥_¥«·s²ø°Ï¤¦»ñ¨½	ªL¥Ã³Ç	·s¥_¥«·s²ø°Ï¤¦»ñ¨½ªL¥Ã³Ç	2	1	1971	µLÄÒÄy¤Î¥¼¸g¬FÄÒ±ÀÂË	0	0	2049	0.5231	1	0	2	KMT	1	0.50097185	0.50097185	1.996120141	·s¥_¥«·s²ø°Ï¤¦»ñ¨½
·s¥_¥«·s²ø°Ï¦X»ñ¨½	¿c·çµo	·s¥_¥«·s²ø°Ï¦X»ñ¨½¿c·çµo	1	1	1956	µLÄÒÄy¤Î¥¼¸g¬FÄÒ±ÀÂË	0	0	1670	0.6457	1	0	2	KMT	1	0.41692849	0.54238613	1.843704963	·s¥_¥«·s²ø°Ï¦X»ñ¨½
·s¥_¥«·s²ø°Ï¦X»ñ¨½	½²¥@®p	·s¥_¥«·s²ø°Ï¦X»ñ¨½½²¥@®p	2	1	1948	µLÄÒÄy¤Î¥¼¸g¬FÄÒ±ÀÂË	0	0	916	0.3542	0	0	2	KMT	1	0.54238613	0.54238613	1.843704963	·s¥_¥«·s²ø°Ï¦X»ñ¨½
·s¥_¥«·s²ø°Ï²»»ñ¨½	³¯´f®¤	·s¥_¥«·s²ø°Ï²»»ñ¨½³¯´f®¤	1	0	1948	µLÄÒÄy¤Î¥¼¸g¬FÄÒ±ÀÂË	0	0	558	0.3988	0	0	2	KMT	1	0.15904144	0.52036265	1.921736697	·s¥_¥«·s²ø°Ï²»»ñ¨½
·s¥_¥«·s²ø°Ï²»»ñ¨½	¿à«T¨}	·s¥_¥«·s²ø°Ï²»»ñ¨½¿à«T¨}	2	1	1962	µLÄÒÄy¤Î¥¼¸g¬FÄÒ±ÀÂË	0	0	841	0.6011	1	0	2	KMT	1	0.52036265	0.52036265	1.921736697	·s¥_¥«·s²ø°Ï²»»ñ¨½
·s¥_¥«·s²ø°ÏÂù»ñ¨½	³¯±M´Ë	·s¥_¥«·s²ø°ÏÂù»ñ¨½³¯±M´Ë	1	1	1958	µLÄÒÄy¤Î¥¼¸g¬FÄÒ±ÀÂË	0	0	3616	1	1	0	1	KMT	1	1	1	1	·s¥_¥«·s²ø°ÏÂù»ñ¨½
·s¥_¥«·s²ø°ÏÀsºÖ¨½	¦¿¦A¤å	·s¥_¥«·s²ø°ÏÀsºÖ¨½¦¿¦A¤å	1	1	1964	¤¤°ê°ê¥ÁÄÒ	1	0	516	0.4459	0	0	2	KMT	1	0.19882681	0.50574281	1.977289603	·s¥_¥«·s²ø°ÏÀsºÖ¨½
·s¥_¥«·s²ø°ÏÀsºÖ¨½	³¯¥ßºû	·s¥_¥«·s²ø°ÏÀsºÖ¨½³¯¥ßºû	2	1	1969	µLÄÒÄy¤Î¥¼¸g¬FÄÒ±ÀÂË	0	0	641	0.554	1	0	2	KMT	1	0.50574281	0.50574281	1.977289603	·s¥_¥«·s²ø°ÏÀsºÖ¨½
·s¥_¥«·s²ø°ÏÀs»ñ¨½	¹ù¯Â	·s¥_¥«·s²ø°ÏÀs»ñ¨½¹ù¯Â	1	0	1955	µLÄÒÄy¤Î¥¼¸g¬FÄÒ±ÀÂË	0	0	956	0.2657	0	0	3	KMT	1	0.07059649	0.34014723	2.939903406	·s¥_¥«·s²ø°ÏÀs»ñ¨½
·s¥_¥«·s²ø°ÏÀs»ñ¨½	Ä¬±¡¸q	·s¥_¥«·s²ø°ÏÀs»ñ¨½Ä¬±¡¸q	2	1	1960	µLÄÒÄy¤Î¥¼¸g¬FÄÒ±ÀÂË	0	0	1308	0.3635	0	0	3	KMT	1	0.20272874	0.34014723	2.939903406	·s¥_¥«·s²ø°ÏÀs»ñ¨½
·s¥_¥«·s²ø°ÏÀs»ñ¨½	§d«G¨°	·s¥_¥«·s²ø°ÏÀs»ñ¨½§d«G¨°	3	1	1965	µLÄÒÄy¤Î¥¼¸g¬FÄÒ±ÀÂË	0	0	1334	0.3707	1	0	3	KMT	1	0.34014723	0.34014723	2.939903406	·s¥_¥«·s²ø°ÏÀs»ñ¨½
·s¥_¥«·s²ø°Ï¸Î¥Á¨½	ªL¬îºÖ	·s¥_¥«·s²ø°Ï¸Î¥Á¨½ªL¬îºÖ	1	1	1962	µLÄÒÄy¤Î¥¼¸g¬FÄÒ±ÀÂË	0	0	2664	0.7008	1	0	2	KMT	1	0.49112064	0.58058145	1.722411214	·s¥_¥«·s²ø°Ï¸Î¥Á¨½
·s¥_¥«·s²ø°Ï¸Î¥Á¨½	´¿·®´Á	·s¥_¥«·s²ø°Ï¸Î¥Á¨½´¿·®´Á	2	1	1967	µLÄÒÄy¤Î¥¼¸g¬FÄÒ±ÀÂË	0	0	1137	0.2991	0	0	2	KMT	1	0.58058145	0.58058145	1.722411214	·s¥_¥«·s²ø°Ï¸Î¥Á¨½
·s¥_¥«·s²ø°ÏÀs¦w¨½	§d©ú©M	·s¥_¥«·s²ø°ÏÀs¦w¨½§d©ú©M	1	1	1958	µLÄÒÄy¤Î¥¼¸g¬FÄÒ±ÀÂË	0	0	646	0.4597	1	0	4	KMT	1	0.21132409	0.32739148	3.054447232	·s¥_¥«·s²ø°ÏÀs¦w¨½
·s¥_¥«·s²ø°ÏÀs¦w¨½	½²ªQ¥Ð	·s¥_¥«·s²ø°ÏÀs¦w¨½½²ªQ¥Ð	2	1	1950	µLÄÒÄy¤Î¥¼¸g¬FÄÒ±ÀÂË	0	0	409	0.2911	0	0	4	KMT	1	0.2960633	0.32739148	3.054447232	·s¥_¥«·s²ø°ÏÀs¦w¨½
·s¥_¥«·s²ø°ÏÀs¦w¨½	§d³¯ªü½v	·s¥_¥«·s²ø°ÏÀs¦w¨½§d³¯ªü½v	3	0	1956	µLÄÒÄy¤Î¥¼¸g¬FÄÒ±ÀÂË	0	0	157	0.1117	0	0	4	KMT	1	0.30854019	0.32739148	3.054447232	·s¥_¥«·s²ø°ÏÀs¦w¨½
·s¥_¥«·s²ø°ÏÀs¦w¨½	¿à¯À­s	·s¥_¥«·s²ø°ÏÀs¦w¨½¿à¯À­s	4	0	1965	µLÄÒÄy¤Î¥¼¸g¬FÄÒ±ÀÂË	0	0	193	0.1373	0	0	4	KMT	1	0.32739148	0.32739148	3.054447232	·s¥_¥«·s²ø°ÏÀs¦w¨½
·s¥_¥«·s²ø°Ï´I°ê¨½	²ø½Ð	·s¥_¥«·s²ø°Ï´I°ê¨½²ø½Ð	1	1	1944	µLÄÒÄy¤Î¥¼¸g¬FÄÒ±ÀÂË	0	0	1122	1	1	0	1	KMT	1	1	1	1	·s¥_¥«·s²ø°Ï´I°ê¨½
·s¥_¥«·s²ø°Ï´I¥Á¨½	³¯¦w¯q	·s¥_¥«·s²ø°Ï´I¥Á¨½³¯¦w¯q	1	1	1960	µLÄÒÄy¤Î¥¼¸g¬FÄÒ±ÀÂË	0	0	902	0.446	0	0	2	KMT	1	0.198916	0.50572121	1.977374056	·s¥_¥«·s²ø°Ï´I¥Á¨½
·s¥_¥«·s²ø°Ï´I¥Á¨½	³¯²M¬u	·s¥_¥«·s²ø°Ï´I¥Á¨½³¯²M¬u	2	1	1961	µLÄÒÄy¤Î¥¼¸g¬FÄÒ±ÀÂË	0	0	1120	0.5539	1	0	2	KMT	1	0.50572121	0.50572121	1.977374056	·s¥_¥«·s²ø°Ï´I¥Á¨½
·s¥_¥«·s²ø°Ï«á¼w¨½	¼B»O»ñ	·s¥_¥«·s²ø°Ï«á¼w¨½¼B»O»ñ	1	1	1951	µLÄÒÄy¤Î¥¼¸g¬FÄÒ±ÀÂË	0	0	1582	1	1	0	1	KMT	1	1	1	1	·s¥_¥«·s²ø°Ï«á¼w¨½
·s¥_¥«·s²ø°Ï¸U¦w¨½	·¨¿Kª÷	·s¥_¥«·s²ø°Ï¸U¦w¨½·¨¿Kª÷	1	1	1954	µLÄÒÄy¤Î¥¼¸g¬FÄÒ±ÀÂË	0	0	431	0.1995	0	0	3	KMT	1	0.03980025	0.40500041	2.469133303	·s¥_¥«·s²ø°Ï¸U¦w¨½
·s¥_¥«·s²ø°Ï¸U¦w¨½	±i´I°]	·s¥_¥«·s²ø°Ï¸U¦w¨½±i´I°]	2	1	1957	µLÄÒÄy¤Î¥¼¸g¬FÄÒ±ÀÂË	0	0	541	0.2504	0	0	3	KMT	1	0.10250041	0.40500041	2.469133303	·s¥_¥«·s²ø°Ï¸U¦w¨½
·s¥_¥«·s²ø°Ï¸U¦w¨½	§õ·sªL	·s¥_¥«·s²ø°Ï¸U¦w¨½§õ·sªL	3	1	1951	µLÄÒÄy¤Î¥¼¸g¬FÄÒ±ÀÂË	0	0	1188	0.55	1	0	3	KMT	1	0.40500041	0.40500041	2.469133303	·s¥_¥«·s²ø°Ï¸U¦w¨½
·s¥_¥«·s²ø°Ï«ØºÖ¨½	§d¾ü¬u	·s¥_¥«·s²ø°Ï«ØºÖ¨½§d¾ü¬u	1	1	1950	µLÄÒÄy¤Î¥¼¸g¬FÄÒ±ÀÂË	0	0	695	0.4227	0	0	3	KMT	1	0.17867529	0.39465262	2.533873967	·s¥_¥«·s²ø°Ï«ØºÖ¨½
·s¥_¥«·s²ø°Ï«ØºÖ¨½	ªLÂ×¸q	·s¥_¥«·s²ø°Ï«ØºÖ¨½ªLÂ×¸q	2	1	1956	µLÄÒÄy¤Î¥¼¸g¬FÄÒ±ÀÂË	0	0	216	0.1313	0	0	3	KMT	1	0.19591498	0.39465262	2.533873967	·s¥_¥«·s²ø°Ï«ØºÖ¨½
·s¥_¥«·s²ø°Ï«ØºÖ¨½	¼B¤¤¥ß	·s¥_¥«·s²ø°Ï«ØºÖ¨½¼B¤¤¥ß	3	1	1957	µLÄÒÄy¤Î¥¼¸g¬FÄÒ±ÀÂË	0	0	733	0.4458	1	0	3	KMT	1	0.39465262	0.39465262	2.533873967	·s¥_¥«·s²ø°Ï«ØºÖ¨½
·s¥_¥«·s²ø°Ï«á´ä¨½	¬I©ú¶i	·s¥_¥«·s²ø°Ï«á´ä¨½¬I©ú¶i	1	1	1946	µLÄÒÄy¤Î¥¼¸g¬FÄÒ±ÀÂË	0	0	3514	1	1	0	1	KMT	1	1	1	1	·s¥_¥«·s²ø°Ï«á´ä¨½
·s¥_¥«·s²ø°Ï¥|ºû¨½	§d·çµo	·s¥_¥«·s²ø°Ï¥|ºû¨½§d·çµo	1	1	1974	µLÄÒÄy¤Î¥¼¸g¬FÄÒ±ÀÂË	0	0	1390	0.5285	1	0	4	KMT	1	0.27931225	0.37017839	2.701400263	·s¥_¥«·s²ø°Ï¥|ºû¨½
·s¥_¥«·s²ø°Ï¥|ºû¨½	¼BÄRµÓ	·s¥_¥«·s²ø°Ï¥|ºû¨½¼BÄRµÓ	2	0	1968	µLÄÒÄy¤Î¥¼¸g¬FÄÒ±ÀÂË	0	0	632	0.2403	0	0	4	KMT	1	0.33705634	0.37017839	2.701400263	·s¥_¥«·s²ø°Ï¥|ºû¨½
·s¥_¥«·s²ø°Ï¥|ºû¨½	¤ýÎr¾ì	·s¥_¥«·s²ø°Ï¥|ºû¨½¤ýÎr¾ì	3	0	1977	¥Á¥D¶i¨BÄÒ	0	1	453	0.1722	0	0	4	KMT	1	0.36670918	0.37017839	2.701400263	·s¥_¥«·s²ø°Ï¥|ºû¨½
·s¥_¥«·s²ø°Ï¥|ºû¨½	¹ù¤Ñ¼w	·s¥_¥«·s²ø°Ï¥|ºû¨½¹ù¤Ñ¼w	4	1	1959	µLÄÒÄy¤Î¥¼¸g¬FÄÒ±ÀÂË	0	0	155	0.0589	0	0	4	KMT	1	0.37017839	0.37017839	2.701400263	·s¥_¥«·s²ø°Ï¥|ºû¨½
·s¥_¥«·s²ø°Ï«n´ä¨½	ªL´Â°ò	·s¥_¥«·s²ø°Ï«n´ä¨½ªL´Â°ò	1	1	1960	µLÄÒÄy¤Î¥¼¸g¬FÄÒ±ÀÂË	0	0	2620	1	1	0	1	KMT	1	1	1	1	·s¥_¥«·s²ø°Ï«n´ä¨½
·s¥_¥«·s²ø°Ï«Ø¦w¨½	¼B¨|§B	·s¥_¥«·s²ø°Ï«Ø¦w¨½¼B¨|§B	1	1	1955	µLÄÒÄy¤Î¥¼¸g¬FÄÒ±ÀÂË	0	0	1595	0.4831	0	0	2	KMT	1	0.23338561	0.50046785	1.998130349	·s¥_¥«·s²ø°Ï«Ø¦w¨½
·s¥_¥«·s²ø°Ï«Ø¦w¨½	¤ý¥ÃµØ	·s¥_¥«·s²ø°Ï«Ø¦w¨½¤ý¥ÃµØ	2	1	1961	µLÄÒÄy¤Î¥¼¸g¬FÄÒ±ÀÂË	0	0	1706	0.5168	1	0	2	KMT	1	0.50046785	0.50046785	1.998130349	·s¥_¥«·s²ø°Ï«Ø¦w¨½
·s¥_¥«·s²ø°Ï¥Á¥þ¨½	±i¤å¿³	·s¥_¥«·s²ø°Ï¥Á¥þ¨½±i¤å¿³	1	1	1965	µLÄÒÄy¤Î¥¼¸g¬FÄÒ±ÀÂË	0	0	1599	0.7344	1	0	2	KMT	1	0.53934336	0.60983361	1.639791549	·s¥_¥«·s²ø°Ï¥Á¥þ¨½
·s¥_¥«·s²ø°Ï¥Á¥þ¨½	ªL°êªv	·s¥_¥«·s²ø°Ï¥Á¥þ¨½ªL°êªv	2	1	1956	µLÄÒÄy¤Î¥¼¸g¬FÄÒ±ÀÂË	0	0	578	0.2655	0	0	2	KMT	1	0.60983361	0.60983361	1.639791549	·s¥_¥«·s²ø°Ï¥Á¥þ¨½
·s¥_¥«·s²ø°Ï¤K¼w¨½	¤B»ÈÄ_	·s¥_¥«·s²ø°Ï¤K¼w¨½¤B»ÈÄ_	1	1	1947	µLÄÒÄy¤Î¥¼¸g¬FÄÒ±ÀÂË	0	0	873	0.4893	0	0	2	KMT	1	0.23941449	0.50012685	1.999492729	·s¥_¥«·s²ø°Ï¤K¼w¨½
·s¥_¥«·s²ø°Ï¤K¼w¨½	µ{«T?	·s¥_¥«·s²ø°Ï¤K¼w¨½µ{«T?	2	1	1969	µLÄÒÄy¤Î¥¼¸g¬FÄÒ±ÀÂË	0	0	911	0.5106	1	0	2	KMT	1	0.50012685	0.50012685	1.999492729	·s¥_¥«·s²ø°Ï¤K¼w¨½
·s¥_¥«·s²ø°Ï¦¨¼w¨½	¤ý¸q¼e	·s¥_¥«·s²ø°Ï¦¨¼w¨½¤ý¸q¼e	1	1	1960	µLÄÒÄy¤Î¥¼¸g¬FÄÒ±ÀÂË	0	0	2345	1	1	0	1	KMT	1	1	1	1	·s¥_¥«·s²ø°Ï¦¨¼w¨½
·s¥_¥«·s²ø°Ï¥Á¦w¨½	¿àÁo¼w	·s¥_¥«·s²ø°Ï¥Á¦w¨½¿àÁo¼w	1	1	1952	¤¤°ê°ê¥ÁÄÒ	1	0	2511	1	1	0	1	KMT	1	1	1	1	·s¥_¥«·s²ø°Ï¥Á¦w¨½
·s¥_¥«·s²ø°Ï¥Á¦³¨½	§d«Ø¼ý	·s¥_¥«·s²ø°Ï¥Á¦³¨½§d«Ø¼ý	1	1	1966	µLÄÒÄy¤Î¥¼¸g¬FÄÒ±ÀÂË	0	0	21	0.01	0	0	4	KMT	1	0.0001	0.47461513	2.106970336	·s¥_¥«·s²ø°Ï¥Á¦³¨½
·s¥_¥«·s²ø°Ï¥Á¦³¨½	§d¤l¿o	·s¥_¥«·s²ø°Ï¥Á¦³¨½§d¤l¿o	2	1	1961	µLÄÒÄy¤Î¥¼¸g¬FÄÒ±ÀÂË	0	0	35	0.0167	0	0	4	KMT	1	0.00037889	0.47461513	2.106970336	·s¥_¥«·s²ø°Ï¥Á¦³¨½
·s¥_¥«·s²ø°Ï¥Á¦³¨½	¿à¬F·½	·s¥_¥«·s²ø°Ï¥Á¦³¨½¿à¬F·½	3	1	1966	µLÄÒÄy¤Î¥¼¸g¬FÄÒ±ÀÂË	0	0	981	0.4682	0	0	4	KMT	1	0.21959013	0.47461513	2.106970336	·s¥_¥«·s²ø°Ï¥Á¦³¨½
·s¥_¥«·s²ø°Ï¥Á¦³¨½	³¯µÂµÂ	·s¥_¥«·s²ø°Ï¥Á¦³¨½³¯µÂµÂ	4	0	1958	µLÄÒÄy¤Î¥¼¸g¬FÄÒ±ÀÂË	0	0	1058	0.505	1	0	4	KMT	1	0.47461513	0.47461513	2.106970336	·s¥_¥«·s²ø°Ï¥Á¦³¨½
·s¥_¥«·s²ø°Ï¥Á¥»¨½	³¯©ú³Ç	·s¥_¥«·s²ø°Ï¥Á¥»¨½³¯©ú³Ç	1	1	1952	¤¤°ê°ê¥ÁÄÒ	1	0	732	0.4013	0	0	2	KMT	1	0.16104169	0.51936365	1.925433172	·s¥_¥«·s²ø°Ï¥Á¥»¨½
·s¥_¥«·s²ø°Ï¥Á¥»¨½	³¯¬î¤ë	·s¥_¥«·s²ø°Ï¥Á¥»¨½³¯¬î¤ë	2	0	1963	µLÄÒÄy¤Î¥¼¸g¬FÄÒ±ÀÂË	0	0	1092	0.5986	1	0	2	KMT	1	0.51936365	0.51936365	1.925433172	·s¥_¥«·s²ø°Ï¥Á¥»¨½
·s¥_¥«·s²ø°Ï¥ú©ú¨½	§f¥­	·s¥_¥«·s²ø°Ï¥ú©ú¨½§f¥­	1	1	1951	¤¤°ê°ê¥ÁÄÒ	1	0	837	0.361	0	0	2	KMT	1	0.130321	0.53851421	1.856961212	·s¥_¥«·s²ø°Ï¥ú©ú¨½
·s¥_¥«·s²ø°Ï¥ú©ú¨½	¶À¬±´Ë	·s¥_¥«·s²ø°Ï¥ú©ú¨½¶À¬±´Ë	2	1	1960	µLÄÒÄy¤Î¥¼¸g¬FÄÒ±ÀÂË	0	0	1481	0.6389	1	0	2	KMT	1	0.53851421	0.53851421	1.856961212	·s¥_¥«·s²ø°Ï¥ú©ú¨½
·s¥_¥«·s²ø°Ï¥ú¥¿¨½	³¯³q§U	·s¥_¥«·s²ø°Ï¥ú¥¿¨½³¯³q§U	1	1	1960	µLÄÒÄy¤Î¥¼¸g¬FÄÒ±ÀÂË	0	0	1948	1	1	0	1	KMT	1	1	1	1	·s¥_¥«·s²ø°Ï¥ú¥¿¨½
·s¥_¥«·s²ø°Ï¥úºa¨½	³¯ªK·£	·s¥_¥«·s²ø°Ï¥úºa¨½³¯ªK·£	1	1	1949	µLÄÒÄy¤Î¥¼¸g¬FÄÒ±ÀÂË	0	0	1928	1	1	0	1	KMT	1	1	1	1	·s¥_¥«·s²ø°Ï¥úºa¨½
·s¥_¥«·s²ø°Ï¥ú©M¨½	ªL¥úÀé	·s¥_¥«·s²ø°Ï¥ú©M¨½ªL¥úÀé	1	1	1955	µLÄÒÄy¤Î¥¼¸g¬FÄÒ±ÀÂË	0	0	1345	1	1	0	1	KMT	1	1	1	1	·s¥_¥«·s²ø°Ï¥ú©M¨½
·s¥_¥«·s²ø°Ï¥úµØ¨½	ªL¤j¤ì	·s¥_¥«·s²ø°Ï¥úµØ¨½ªL¤j¤ì	1	1	1965	µLÄÒÄy¤Î¥¼¸g¬FÄÒ±ÀÂË	0	0	1979	0.5685	1	0	3	KMT	1	0.32319225	0.44704685	2.236902016	·s¥_¥«·s²ø°Ï¥úµØ¨½
·s¥_¥«·s²ø°Ï¥úµØ¨½	§õ¦X´Å	·s¥_¥«·s²ø°Ï¥úµØ¨½§õ¦X´Å	2	1	1946	µLÄÒÄy¤Î¥¼¸g¬FÄÒ±ÀÂË	0	0	1183	0.3398	0	0	3	KMT	1	0.43865629	0.44704685	2.236902016	·s¥_¥«·s²ø°Ï¥úµØ¨½
·s¥_¥«·s²ø°Ï¥úµØ¨½	ÁÂ¬î±ö	·s¥_¥«·s²ø°Ï¥úµØ¨½ÁÂ¬î±ö	3	0	1952	µLÄÒÄy¤Î¥¼¸g¬FÄÒ±ÀÂË	0	0	319	0.0916	0	0	3	KMT	1	0.44704685	0.44704685	2.236902016	·s¥_¥«·s²ø°Ï¥úµØ¨½
·s¥_¥«·s²ø°Ï¦è²±¨½	±i¤å·ç	·s¥_¥«·s²ø°Ï¦è²±¨½±i¤å·ç	1	1	1963	µLÄÒÄy¤Î¥¼¸g¬FÄÒ±ÀÂË	0	0	2248	0.4474	0	0	2	KMT	1	0.20016676	0.50542301	1.978540708	·s¥_¥«·s²ø°Ï¦è²±¨½
·s¥_¥«·s²ø°Ï¦è²±¨½	³¯ª÷¥Ð	·s¥_¥«·s²ø°Ï¦è²±¨½³¯ª÷¥Ð	2	1	1960	µLÄÒÄy¤Î¥¼¸g¬FÄÒ±ÀÂË	0	0	2776	0.5525	1	0	2	KMT	1	0.50542301	0.50542301	1.978540708	·s¥_¥«·s²ø°Ï¦è²±¨½
·s¥_¥«Äª¬w°Ï¥úµØ¨½	ªL§Q«Û	·s¥_¥«Äª¬w°Ï¥úµØ¨½ªL§Q«Û	1	1	1944	¤¤°ê°ê¥ÁÄÒ	1	0	2447	1	1	0	1	KMT	1	1	1	1	·s¥_¥«Äª¬w°Ï¥úµØ¨½
·s¥_¥«Äª¬w°Ï¥ú©ú¨½	³¯¤å¨}	·s¥_¥«Äª¬w°Ï¥ú©ú¨½³¯¤å¨}	1	1	1957	¥Á¥D¶i¨BÄÒ	0	1	2525	1	1	0	1	KMT	1	1	1	1	·s¥_¥«Äª¬w°Ï¥ú©ú¨½
·s¥_¥«Äª¬w°Ï¤¤¸ô¨½	±i©vÄ£	·s¥_¥«Äª¬w°Ï¤¤¸ô¨½±i©vÄ£	1	1	1959	µLÄÒÄy¤Î¥¼¸g¬FÄÒ±ÀÂË	0	0	1883	1	1	0	1	KMT	1	1	1	1	·s¥_¥«Äª¬w°Ï¤¤¸ô¨½
·s¥_¥«Äª¬w°Ï¥Ã¦w¨½	ªL¥Ã´I	·s¥_¥«Äª¬w°Ï¥Ã¦w¨½ªL¥Ã´I	1	1	1961	µLÄÒÄy¤Î¥¼¸g¬FÄÒ±ÀÂË	0	0	1600	0.561	1	0	2	KMT	1	0.314721	0.50735421	1.971009564	·s¥_¥«Äª¬w°Ï¥Ã¦w¨½
·s¥_¥«Äª¬w°Ï¥Ã¦w¨½	§dÁÂªü¯À	·s¥_¥«Äª¬w°Ï¥Ã¦w¨½§dÁÂªü¯À	2	0	1952	¥Á¥D¶i¨BÄÒ	0	1	1252	0.4389	0	0	2	KMT	1	0.50735421	0.50735421	1.971009564	·s¥_¥«Äª¬w°Ï¥Ã¦w¨½
·s¥_¥«Äª¬w°Ï¤EË|¨½	§õ­Z¶¯	·s¥_¥«Äª¬w°Ï¤EË|¨½§õ­Z¶¯	1	1	1943	¥Á¥D¶i¨BÄÒ	0	1	1223	0.4544	1	0	3	KMT	1	0.20647936	0.36670122	2.727015743	·s¥_¥«Äª¬w°Ï¤EË|¨½
·s¥_¥«Äª¬w°Ï¤EË|¨½	³¯®¶·½	·s¥_¥«Äª¬w°Ï¤EË|¨½³¯®¶·½	2	1	1955	µLÄÒÄy¤Î¥¼¸g¬FÄÒ±ÀÂË	0	0	938	0.3485	0	0	3	KMT	1	0.32793161	0.36670122	2.727015743	·s¥_¥«Äª¬w°Ï¤EË|¨½
·s¥_¥«Äª¬w°Ï¤EË|¨½	®}¬xÄR¯]	·s¥_¥«Äª¬w°Ï¤EË|¨½®}¬xÄR¯]	3	0	1958	µLÄÒÄy¤Î¥¼¸g¬FÄÒ±ÀÂË	0	0	530	0.1969	0	0	3	KMT	1	0.36670122	0.36670122	2.727015743	·s¥_¥«Äª¬w°Ï¤EË|¨½
·s¥_¥«Äª¬w°Ï©µ¥­¨½	±i©ú¼w	·s¥_¥«Äª¬w°Ï©µ¥­¨½±i©ú¼w	1	1	1947	¥Á¥D¶i¨BÄÒ	0	1	1924	1	1	0	1	KMT	1	1	1	1	·s¥_¥«Äª¬w°Ï©µ¥­¨½
·s¥_¥«Äª¬w°Ï¤¤µØ¨½	²øïú?	·s¥_¥«Äª¬w°Ï¤¤µØ¨½²øïú?	1	1	1975	µLÄÒÄy¤Î¥¼¸g¬FÄÒ±ÀÂË	0	0	527	0.2545	0	0	4	KMT	1	0.06477025	0.2955447	3.383582923	·s¥_¥«Äª¬w°Ï¤¤µØ¨½
·s¥_¥«Äª¬w°Ï¤¤µØ¨½	§õªLÄ_½¬	·s¥_¥«Äª¬w°Ï¤¤µØ¨½§õªLÄ_½¬	2	0	1945	¤¤°ê°ê¥ÁÄÒ	1	0	293	0.1415	0	0	4	KMT	1	0.0847925	0.2955447	3.383582923	·s¥_¥«Äª¬w°Ï¤¤µØ¨½
·s¥_¥«Äª¬w°Ï¤¤µØ¨½	½²©y®p	·s¥_¥«Äª¬w°Ï¤¤µØ¨½½²©y®p	3	1	1974	¥Á¥D¶i¨BÄÒ	0	1	872	0.4212	1	0	4	KMT	1	0.26220194	0.2955447	3.383582923	·s¥_¥«Äª¬w°Ï¤¤µØ¨½
·s¥_¥«Äª¬w°Ï¤¤µØ¨½	±iÀAªQ	·s¥_¥«Äª¬w°Ï¤¤µØ¨½±iÀAªQ	4	1	1958	µLÄÒÄy¤Î¥¼¸g¬FÄÒ±ÀÂË	0	0	378	0.1826	0	0	4	KMT	1	0.2955447	0.2955447	3.383582923	·s¥_¥«Äª¬w°Ï¤¤µØ¨½
·s¥_¥«Äª¬w°Ï¤¤­ì¨½	³¢ªQ¦t	·s¥_¥«Äª¬w°Ï¤¤­ì¨½³¢ªQ¦t	1	1	1943	µLÄÒÄy¤Î¥¼¸g¬FÄÒ±ÀÂË	0	0	609	0.2092	0	0	3	KMT	1	0.04376464	0.3583113	2.79086928	·s¥_¥«Äª¬w°Ï¤¤­ì¨½
·s¥_¥«Äª¬w°Ï¤¤­ì¨½	³¯¤Í¸q	·s¥_¥«Äª¬w°Ï¤¤­ì¨½³¯¤Í¸q	2	1	1949	µLÄÒÄy¤Î¥¼¸g¬FÄÒ±ÀÂË	0	0	1058	0.3635	0	0	3	KMT	1	0.17589689	0.3583113	2.79086928	·s¥_¥«Äª¬w°Ï¤¤­ì¨½
·s¥_¥«Äª¬w°Ï¤¤­ì¨½	³¯°ê³s	·s¥_¥«Äª¬w°Ï¤¤­ì¨½³¯°ê³s	3	1	1962	¥Á¥D¶i¨BÄÒ	0	1	1243	0.4271	1	0	3	KMT	1	0.3583113	0.3583113	2.79086928	·s¥_¥«Äª¬w°Ï¤¤­ì¨½
·s¥_¥«Äª¬w°Ïªø¦w¨½	¤ýÄR¯u	·s¥_¥«Äª¬w°Ïªø¦w¨½¤ýÄR¯u	1	0	1961	µLÄÒÄy¤Î¥¼¸g¬FÄÒ±ÀÂË	0	0	1401	0.5045	1	0	2	KMT	1	0.25452025	0.49994141	2.000234387	·s¥_¥«Äª¬w°Ïªø¦w¨½
·s¥_¥«Äª¬w°Ïªø¦w¨½	¤B³s¶i	·s¥_¥«Äª¬w°Ïªø¦w¨½¤B³s¶i	2	1	1951	¥Á¥D¶i¨BÄÒ	0	1	1376	0.4954	0	0	2	KMT	1	0.49994141	0.49994141	2.000234387	·s¥_¥«Äª¬w°Ïªø¦w¨½
·s¥_¥«Äª¬w°Ï©¾¸q¨½	ªL¸U¯q	·s¥_¥«Äª¬w°Ï©¾¸q¨½ªL¸U¯q	1	1	1954	µLÄÒÄy¤Î¥¼¸g¬FÄÒ±ÀÂË	0	0	958	0.524	1	0	2	KMT	1	0.274576	0.50105681	1.995781676	·s¥_¥«Äª¬w°Ï©¾¸q¨½
·s¥_¥«Äª¬w°Ï©¾¸q¨½	ÁÂ¨ç³®	·s¥_¥«Äª¬w°Ï©¾¸q¨½ÁÂ¨ç³®	2	0	1975	¥Á¥D¶i¨BÄÒ	0	1	870	0.4759	0	0	2	KMT	1	0.50105681	0.50105681	1.995781676	·s¥_¥«Äª¬w°Ï©¾¸q¨½
·s¥_¥«Äª¬w°Ï¥¿¸q¨½	ªL§Ó­×	·s¥_¥«Äª¬w°Ï¥¿¸q¨½ªL§Ó­×	1	1	1964	µLÄÒÄy¤Î¥¼¸g¬FÄÒ±ÀÂË	0	0	2979	0.5984	1	0	2	KMT	1	0.35808256	0.51928481	1.925725499	·s¥_¥«Äª¬w°Ï¥¿¸q¨½
·s¥_¥«Äª¬w°Ï¥¿¸q¨½	¿cÄ£ªÚ	·s¥_¥«Äª¬w°Ï¥¿¸q¨½¿cÄ£ªÚ	2	1	1958	µLÄÒÄy¤Î¥¼¸g¬FÄÒ±ÀÂË	0	0	1999	0.4015	0	0	2	KMT	1	0.51928481	0.51928481	1.925725499	·s¥_¥«Äª¬w°Ï¥¿¸q¨½
·s¥_¥«Äª¬w°Ï«n´ä¨½	¤ý¯]­»	·s¥_¥«Äª¬w°Ï«n´ä¨½¤ý¯]­»	1	0	1966	µLÄÒÄy¤Î¥¼¸g¬FÄÒ±ÀÂË	0	0	2650	1	1	0	1	KMT	1	1	1	1	·s¥_¥«Äª¬w°Ï«n´ä¨½
·s¥_¥«Äª¬w°Ï¥Ã¼Ö¨½	§õ¦A´I	·s¥_¥«Äª¬w°Ï¥Ã¼Ö¨½§õ¦A´I	1	1	1951	µLÄÒÄy¤Î¥¼¸g¬FÄÒ±ÀÂË	0	0	2546	1	1	0	1	KMT	1	1	1	1	·s¥_¥«Äª¬w°Ï¥Ã¼Ö¨½
·s¥_¥«Äª¬w°Ï¦¨¥\¨½	¿½¤åºÖ	·s¥_¥«Äª¬w°Ï¦¨¥\¨½¿½¤åºÖ	1	1	1963	µLÄÒÄy¤Î¥¼¸g¬FÄÒ±ÀÂË	0	0	1438	0.3819	0	0	3	KMT	1	0.14584761	0.35463233	2.81982187	·s¥_¥«Äª¬w°Ï¦¨¥\¨½
·s¥_¥«Äª¬w°Ï¦¨¥\¨½	ªL¼w¸q	·s¥_¥«Äª¬w°Ï¦¨¥\¨½ªL¼w¸q	2	1	1961	¥Á¥D¶i¨BÄÒ	0	1	1519	0.4034	1	0	3	KMT	1	0.30857917	0.35463233	2.81982187	·s¥_¥«Äª¬w°Ï¦¨¥\¨½
·s¥_¥«Äª¬w°Ï¦¨¥\¨½	§õ¸qºÖ	·s¥_¥«Äª¬w°Ï¦¨¥\¨½§õ¸qºÖ	3	1	1956	µLÄÒÄy¤Î¥¼¸g¬FÄÒ±ÀÂË	0	0	808	0.2146	0	0	3	KMT	1	0.35463233	0.35463233	2.81982187	·s¥_¥«Äª¬w°Ï¦¨¥\¨½
·s¥_¥«Äª¬w°Ï¥Ã±d¨½	¶À¬î¤ë	·s¥_¥«Äª¬w°Ï¥Ã±d¨½¶À¬î¤ë	1	0	1961	µLÄÒÄy¤Î¥¼¸g¬FÄÒ±ÀÂË	0	0	3058	1	1	0	1	KMT	1	1	1	1	·s¥_¥«Äª¬w°Ï¥Ã±d¨½
·s¥_¥«Äª¬w°Ï¥Ã¼w¨½	³¯«É¦w	·s¥_¥«Äª¬w°Ï¥Ã¼w¨½³¯«É¦w	1	0	1981	µLÄÒÄy¤Î¥¼¸g¬FÄÒ±ÀÂË	0	0	1481	0.6077	1	0	2	KMT	1	0.36929929	0.52312013	1.911606804	·s¥_¥«Äª¬w°Ï¥Ã¼w¨½
·s¥_¥«Äª¬w°Ï¥Ã¼w¨½	ªL¦³º}	·s¥_¥«Äª¬w°Ï¥Ã¼w¨½ªL¦³º}	2	1	1958	µLÄÒÄy¤Î¥¼¸g¬FÄÒ±ÀÂË	0	0	956	0.3922	0	0	2	KMT	1	0.52312013	0.52312013	1.911606804	·s¥_¥«Äª¬w°Ï¥Ã¼w¨½
·s¥_¥«Äª¬w°Ï¼Ó­í¨½	§õÞm±G	·s¥_¥«Äª¬w°Ï¼Ó­í¨½§õÞm±G	1	1	1958	µLÄÒÄy¤Î¥¼¸g¬FÄÒ±ÀÂË	0	0	2908	1	1	0	1	KMT	1	1	1	1	·s¥_¥«Äª¬w°Ï¼Ó­í¨½
·s¥_¥«Äª¬w°Ï«H¸q¨½	³¢ÄËªÚ	·s¥_¥«Äª¬w°Ï«H¸q¨½³¢ÄËªÚ	1	1	1957	µLÄÒÄy¤Î¥¼¸g¬FÄÒ±ÀÂË	0	0	1396	0.5667	1	0	2	KMT	1	0.32114889	0.50881113	1.965365813	·s¥_¥«Äª¬w°Ï«H¸q¨½
·s¥_¥«Äª¬w°Ï«H¸q¨½	§õ¦³§ø	·s¥_¥«Äª¬w°Ï«H¸q¨½§õ¦³§ø	2	1	1946	µLÄÒÄy¤Î¥¼¸g¬FÄÒ±ÀÂË	0	0	1067	0.4332	0	0	2	KMT	1	0.50881113	0.50881113	1.965365813	·s¥_¥«Äª¬w°Ï«H¸q¨½
·s¥_¥«Äª¬w°Ï¥É²M¨½	·¨·q³ß	·s¥_¥«Äª¬w°Ï¥É²M¨½·¨·q³ß	1	1	1952	µLÄÒÄy¤Î¥¼¸g¬FÄÒ±ÀÂË	0	0	2465	1	1	0	1	KMT	1	1	1	1	·s¥_¥«Äª¬w°Ï¥É²M¨½
·s¥_¥«Äª¬w°Ï´_¿³¨½	§õ·½¬u	·s¥_¥«Äª¬w°Ï´_¿³¨½§õ·½¬u	1	1	1965	µLÄÒÄy¤Î¥¼¸g¬FÄÒ±ÀÂË	0	0	1647	1	1	0	1	KMT	1	1	1	1	·s¥_¥«Äª¬w°Ï´_¿³¨½
·s¥_¥«Äª¬w°ÏºÖ¦w¨½	§õ¤å¸q	·s¥_¥«Äª¬w°ÏºÖ¦w¨½§õ¤å¸q	1	1	1943	µLÄÒÄy¤Î¥¼¸g¬FÄÒ±ÀÂË	0	0	1439	1	1	0	1	KMT	1	1	1	1	·s¥_¥«Äª¬w°ÏºÖ¦w¨½
·s¥_¥«Äª¬w°ÏÆO¦¿¨½	§õºa¦N	·s¥_¥«Äª¬w°ÏÆO¦¿¨½§õºa¦N	1	1	1976	µLÄÒÄy¤Î¥¼¸g¬FÄÒ±ÀÂË	0	0	564	0.1825	0	0	3	KMT	1	0.03330625	0.36820995	2.715841872	·s¥_¥«Äª¬w°ÏÆO¦¿¨½
·s¥_¥«Äª¬w°ÏÆO¦¿¨½	·¨ßN¸­	·s¥_¥«Äª¬w°ÏÆO¦¿¨½·¨ßN¸­	2	0	1961	µLÄÒÄy¤Î¥¼¸g¬FÄÒ±ÀÂË	0	0	1326	0.4291	1	0	3	KMT	1	0.21743306	0.36820995	2.715841872	·s¥_¥«Äª¬w°ÏÆO¦¿¨½
·s¥_¥«Äª¬w°ÏÆO¦¿¨½	½²Â×¦~	·s¥_¥«Äª¬w°ÏÆO¦¿¨½½²Â×¦~	3	1	1982	µLÄÒÄy¤Î¥¼¸g¬FÄÒ±ÀÂË	0	0	1200	0.3883	0	0	3	KMT	1	0.36820995	0.36820995	2.715841872	·s¥_¥«Äª¬w°ÏÆO¦¿¨½
·s¥_¥«Äª¬w°Ï«í¼w¨½	§d¤j¼w	·s¥_¥«Äª¬w°Ï«í¼w¨½§d¤j¼w	1	1	1975	µLÄÒÄy¤Î¥¼¸g¬FÄÒ±ÀÂË	0	0	1537	0.4771	0	0	2	KMT	1	0.22762441	0.50094425	1.996230119	·s¥_¥«Äª¬w°Ï«í¼w¨½
·s¥_¥«Äª¬w°Ï«í¼w¨½	³\­Ü­¦	·s¥_¥«Äª¬w°Ï«í¼w¨½³\­Ü­¦	2	1	1938	µLÄÒÄy¤Î¥¼¸g¬FÄÒ±ÀÂË	0	0	1684	0.5228	1	0	2	KMT	1	0.50094425	0.50094425	1.996230119	·s¥_¥«Äª¬w°Ï«í¼w¨½
·s¥_¥«Äª¬w°Ï·ËáY¨½	§õ¥ÃªÚ	·s¥_¥«Äª¬w°Ï·ËáY¨½§õ¥ÃªÚ	1	1	1958	¥Á¥D¶i¨BÄÒ	0	1	575	0.2811	0	0	3	KMT	1	0.07901721	0.33752691	2.962726735	·s¥_¥«Äª¬w°Ï·ËáY¨½
·s¥_¥«Äª¬w°Ï·ËáY¨½	¿½¥õ¯u	·s¥_¥«Äª¬w°Ï·ËáY¨½¿½¥õ¯u	2	0	1968	µLÄÒÄy¤Î¥¼¸g¬FÄÒ±ÀÂË	0	0	754	0.3687	1	0	3	KMT	1	0.2149569	0.33752691	2.962726735	·s¥_¥«Äª¬w°Ï·ËáY¨½
·s¥_¥«Äª¬w°Ï·ËáY¨½	³¯½²»È­»	·s¥_¥«Äª¬w°Ï·ËáY¨½³¯½²»È­»	3	0	1950	µLÄÒÄy¤Î¥¼¸g¬FÄÒ±ÀÂË	0	0	716	0.3501	0	0	3	KMT	1	0.33752691	0.33752691	2.962726735	·s¥_¥«Äª¬w°Ï·ËáY¨½
·s¥_¥«Äª¬w°Ï¤¯´_¨½	§õ¼w³Ó	·s¥_¥«Äª¬w°Ï¤¯´_¨½§õ¼w³Ó	1	1	1951	µLÄÒÄy¤Î¥¼¸g¬FÄÒ±ÀÂË	0	0	1181	1	1	0	1	KMT	1	1	1	1	·s¥_¥«Äª¬w°Ï¤¯´_¨½
·s¥_¥«Äª¬w°Ï¤¯¼w¨½	±i§»¤Í	·s¥_¥«Äª¬w°Ï¤¯¼w¨½±i§»¤Í	1	1	1960	µLÄÒÄy¤Î¥¼¸g¬FÄÒ±ÀÂË	0	0	1142	0.3553	1	0	4	KMT	1	0.12623809	0.27034285	3.69900665	·s¥_¥«Äª¬w°Ï¤¯¼w¨½
·s¥_¥«Äª¬w°Ï¤¯¼w¨½	§õÄR¬Â	·s¥_¥«Äª¬w°Ï¤¯¼w¨½§õÄR¬Â	2	0	1961	¥Á¥D¶i¨BÄÒ	0	1	880	0.2738	0	0	4	KMT	1	0.20120453	0.27034285	3.69900665	·s¥_¥«Äª¬w°Ï¤¯¼w¨½
·s¥_¥«Äª¬w°Ï¤¯¼w¨½	·¨ßN·L	·s¥_¥«Äª¬w°Ï¤¯¼w¨½·¨ßN·L	3	0	1984	µLÄÒÄy¤Î¥¼¸g¬FÄÒ±ÀÂË	0	0	551	0.1714	0	0	4	KMT	1	0.23058249	0.27034285	3.69900665	·s¥_¥«Äª¬w°Ï¤¯¼w¨½
·s¥_¥«Äª¬w°Ï¤¯¼w¨½	¶À·çÂ×	·s¥_¥«Äª¬w°Ï¤¯¼w¨½¶À·çÂ×	4	1	1963	µLÄÒÄy¤Î¥¼¸g¬FÄÒ±ÀÂË	0	0	641	0.1994	0	0	4	KMT	1	0.27034285	0.27034285	3.69900665	·s¥_¥«Äª¬w°Ï¤¯¼w¨½
·s¥_¥«Äª¬w°Ï¤¯¸q¨½	§dªFÀé	·s¥_¥«Äª¬w°Ï¤¯¸q¨½§dªFÀé	1	1	1960	µLÄÒÄy¤Î¥¼¸g¬FÄÒ±ÀÂË	0	0	767	0.4105	1	0	3	KMT	1	0.16851025	0.34264362	2.918484226	·s¥_¥«Äª¬w°Ï¤¯¸q¨½
·s¥_¥«Äª¬w°Ï¤¯¸q¨½	§õ­lÝß	·s¥_¥«Äª¬w°Ï¤¯¸q¨½§õ­lÝß	2	1	1957	µLÄÒÄy¤Î¥¼¸g¬FÄÒ±ÀÂË	0	0	521	0.2789	0	0	3	KMT	1	0.24629546	0.34264362	2.918484226	·s¥_¥«Äª¬w°Ï¤¯¸q¨½
·s¥_¥«Äª¬w°Ï¤¯¸q¨½	·¨®Ñ·ì	·s¥_¥«Äª¬w°Ï¤¯¸q¨½·¨®Ñ·ì	3	0	1986	µLÄÒÄy¤Î¥¼¸g¬FÄÒ±ÀÂË	0	0	580	0.3104	0	0	3	KMT	1	0.34264362	0.34264362	2.918484226	·s¥_¥«Äª¬w°Ï¤¯¸q¨½
·s¥_¥«Äª¬w°Ï±o³Ó¨½	½²§Ó¿ï	·s¥_¥«Äª¬w°Ï±o³Ó¨½½²§Ó¿ï	1	1	1958	µLÄÒÄy¤Î¥¼¸g¬FÄÒ±ÀÂË	0	0	1613	1	1	0	1	KMT	1	1	1	1	·s¥_¥«Äª¬w°Ï±o³Ó¨½
·s¥_¥«Äª¬w°Ï±o¤¯¨½	§õ»ñ¼b	·s¥_¥«Äª¬w°Ï±o¤¯¨½§õ»ñ¼b	1	0	1949	µLÄÒÄy¤Î¥¼¸g¬FÄÒ±ÀÂË	0	0	1510	1	1	0	1	KMT	1	1	1	1	·s¥_¥«Äª¬w°Ï±o¤¯¨½
·s¥_¥«Äª¬w°Ï«O©M¨½	·¨Á`¤¯	·s¥_¥«Äª¬w°Ï«O©M¨½·¨Á`¤¯	1	1	1956	µLÄÒÄy¤Î¥¼¸g¬FÄÒ±ÀÂË	0	0	1200	1	1	0	1	KMT	1	1	1	1	·s¥_¥«Äª¬w°Ï«O©M¨½
·s¥_¥«Äª¬w°Ï¾ð¼w¨½	§õªÚÀs	·s¥_¥«Äª¬w°Ï¾ð¼w¨½§õªÚÀs	1	1	1966	µLÄÒÄy¤Î¥¼¸g¬FÄÒ±ÀÂË	0	0	1728	1	1	0	1	KMT	1	1	1	1	·s¥_¥«Äª¬w°Ï¾ð¼w¨½
·s¥_¥«Äª¬w°Ï¥Á©M¨½	§õ¶i¸Û	·s¥_¥«Äª¬w°Ï¥Á©M¨½§õ¶i¸Û	1	1	1964	¤¤°ê°ê¥ÁÄÒ	1	0	1050	0.5869	1	0	2	KMT	1	0.34445161	0.51502061	1.941669868	·s¥_¥«Äª¬w°Ï¥Á©M¨½
·s¥_¥«Äª¬w°Ï¥Á©M¨½	§ù©öÁÖ	·s¥_¥«Äª¬w°Ï¥Á©M¨½§ù©öÁÖ	2	1	1950	¥Á¥D¶i¨BÄÒ	0	1	739	0.413	0	0	2	KMT	1	0.51502061	0.51502061	1.941669868	·s¥_¥«Äª¬w°Ï¥Á©M¨½
·s¥_¥«Äª¬w°Ï¤ôÙõ¨½	§dªQ¼Ð	·s¥_¥«Äª¬w°Ï¤ôÙõ¨½§dªQ¼Ð	1	1	1958	µLÄÒÄy¤Î¥¼¸g¬FÄÒ±ÀÂË	0	0	3716	0.697	1	0	2	KMT	1	0.485809	0.57755741	1.731429608	·s¥_¥«Äª¬w°Ï¤ôÙõ¨½
·s¥_¥«Äª¬w°Ï¤ôÙõ¨½	§õ¥@¥Ð	·s¥_¥«Äª¬w°Ï¤ôÙõ¨½§õ¥@¥Ð	2	1	1972	¥Á¥D¶i¨BÄÒ	0	1	1615	0.3029	0	0	2	KMT	1	0.57755741	0.57755741	1.731429608	·s¥_¥«Äª¬w°Ï¤ôÙõ¨½
·s¥_¥«Äª¬w°Ï¤ôªe¨½	§õ¤åµo	·s¥_¥«Äª¬w°Ï¤ôªe¨½§õ¤åµo	1	1	1958	¤¤°ê°ê¥ÁÄÒ	1	0	3929	1	1	0	1	KMT	1	1	1	1	·s¥_¥«Äª¬w°Ï¤ôªe¨½
·s¥_¥«Äª¬w°Ï¤¯·R¨½	ªL§»¨å	·s¥_¥«Äª¬w°Ï¤¯·R¨½ªL§»¨å	1	1	1955	µLÄÒÄy¤Î¥¼¸g¬FÄÒ±ÀÂË	0	0	2069	0.7004	1	0	2	KMT	1	0.49056016	0.58026041	1.72336417	·s¥_¥«Äª¬w°Ï¤¯·R¨½
·s¥_¥«Äª¬w°Ï¤¯·R¨½	¶À¤Ó¶§	·s¥_¥«Äª¬w°Ï¤¯·R¨½¶À¤Ó¶§	2	1	1963	µLÄÒÄy¤Î¥¼¸g¬FÄÒ±ÀÂË	0	0	885	0.2995	0	0	2	KMT	1	0.58026041	0.58026041	1.72336417	·s¥_¥«Äª¬w°Ï¤¯·R¨½
·s¥_¥«Äª¬w°Ï©¾§µ¨½	¸âªü­×	·s¥_¥«Äª¬w°Ï©¾§µ¨½¸âªü­×	1	0	1959	µLÄÒÄy¤Î¥¼¸g¬FÄÒ±ÀÂË	0	0	1256	1	1	0	1	KMT	1	1	1	1	·s¥_¥«Äª¬w°Ï©¾§µ¨½
·s¥_¥«Äª¬w°Ï«O¦ö¨½	§õ®É¬K	·s¥_¥«Äª¬w°Ï«O¦ö¨½§õ®É¬K	1	1	1972	µLÄÒÄy¤Î¥¼¸g¬FÄÒ±ÀÂË	0	0	1463	0.6413	1	0	2	KMT	1	0.41126569	0.53985965	1.852333287	·s¥_¥«Äª¬w°Ï«O¦ö¨½
·s¥_¥«Äª¬w°Ï«O¦ö¨½	³¯ºaµØ	·s¥_¥«Äª¬w°Ï«O¦ö¨½³¯ºaµØ	2	1	1950	µLÄÒÄy¤Î¥¼¸g¬FÄÒ±ÀÂË	0	0	818	0.3586	0	0	2	KMT	1	0.53985965	0.53985965	1.852333287	·s¥_¥«Äª¬w°Ï«O¦ö¨½
·s¥_¥«Äª¬w°Ï«O·s¨½	½²´Ì½÷	·s¥_¥«Äª¬w°Ï«O·s¨½½²´Ì½÷	1	1	1959	µLÄÒÄy¤Î¥¼¸g¬FÄÒ±ÀÂË	0	0	1321	1	1	0	1	KMT	1	1	1	1	·s¥_¥«Äª¬w°Ï«O·s¨½
·s¥_¥«¤T­«°Ï¤j¦³¨½	ÃQ¥þ?	·s¥_¥«¤T­«°Ï¤j¦³¨½ÃQ¥þ?	1	1	1959	µLÄÒÄy¤Î¥¼¸g¬FÄÒ±ÀÂË	0	0	670	0.2178	0	0	3	KMT	1	0.04743684	0.35621849	2.807265844	·s¥_¥«¤T­«°Ï¤j¦³¨½
·s¥_¥«¤T­«°Ï¤j¦³¨½	¸³«T§»	·s¥_¥«¤T­«°Ï¤j¦³¨½¸³«T§»	2	1	1969	µLÄÒÄy¤Î¥¼¸g¬FÄÒ±ÀÂË	0	0	1321	0.4294	1	0	3	KMT	1	0.2318212	0.35621849	2.807265844	·s¥_¥«¤T­«°Ï¤j¦³¨½
·s¥_¥«¤T­«°Ï¤j¦³¨½	²ø²M¥Ð	·s¥_¥«¤T­«°Ï¤j¦³¨½²ø²M¥Ð	3	1	1941	¤¤°ê°ê¥ÁÄÒ	1	0	1085	0.3527	0	0	3	KMT	1	0.35621849	0.35621849	2.807265844	·s¥_¥«¤T­«°Ï¤j¦³¨½
·s¥_¥«¤T­«°Ï³Õ·R¨½	ªL¼s	·s¥_¥«¤T­«°Ï³Õ·R¨½ªL¼s	1	1	1958	µLÄÒÄy¤Î¥¼¸g¬FÄÒ±ÀÂË	0	0	2349	1	1	0	1	KMT	1	1	1	1	·s¥_¥«¤T­«°Ï³Õ·R¨½
·s¥_¥«¤T­«°Ï¤G­«¨½	¸­·s¶i	·s¥_¥«¤T­«°Ï¤G­«¨½¸­·s¶i	1	1	1950	¥Á¥D¶i¨BÄÒ	0	1	339	0.2744	0	0	2	KMT	1	0.07529536	0.60164561	1.662108031	·s¥_¥«¤T­«°Ï¤G­«¨½
·s¥_¥«¤T­«°Ï¤G­«¨½	¸­¼w®Ú	·s¥_¥«¤T­«°Ï¤G­«¨½¸­¼w®Ú	2	1	1946	µLÄÒÄy¤Î¥¼¸g¬FÄÒ±ÀÂË	0	0	896	0.7255	1	0	2	KMT	1	0.60164561	0.60164561	1.662108031	·s¥_¥«¤T­«°Ï¤G­«¨½
·s¥_¥«¤T­«°Ï³»®r¨½	½²¤å¨}	·s¥_¥«¤T­«°Ï³»®r¨½½²¤å¨}	1	1	1952	µLÄÒÄy¤Î¥¼¸g¬FÄÒ±ÀÂË	0	0	473	0.3407	0	0	2	KMT	1	0.11607649	0.55062113	1.816130812	·s¥_¥«¤T­«°Ï³»®r¨½
·s¥_¥«¤T­«°Ï³»®r¨½	³¢¤å«Ì	·s¥_¥«¤T­«°Ï³»®r¨½³¢¤å«Ì	2	1	1965	µLÄÒÄy¤Î¥¼¸g¬FÄÒ±ÀÂË	0	0	915	0.6592	1	0	2	KMT	1	0.55062113	0.55062113	1.816130812	·s¥_¥«¤T­«°Ï³»®r¨½
·s¥_¥«¤T­«°Ï¨¦¤ý¨½	©P¬F¼Ì	·s¥_¥«¤T­«°Ï¨¦¤ý¨½©P¬F¼Ì	1	1	1942	µLÄÒÄy¤Î¥¼¸g¬FÄÒ±ÀÂË	0	0	276	0.3187	0	0	3	KMT	1	0.10156969	0.33359699	2.997628965	·s¥_¥«¤T­«°Ï¨¦¤ý¨½
·s¥_¥«¤T­«°Ï¨¦¤ý¨½	¤ý??	·s¥_¥«¤T­«°Ï¨¦¤ý¨½¤ý??	2	1	1951	µLÄÒÄy¤Î¥¼¸g¬FÄÒ±ÀÂË	0	0	297	0.3429	1	0	3	KMT	1	0.2191501	0.33359699	2.997628965	·s¥_¥«¤T­«°Ï¨¦¤ý¨½
·s¥_¥«¤T­«°Ï¨¦¤ý¨½	±i´¼¯à	·s¥_¥«¤T­«°Ï¨¦¤ý¨½±i´¼¯à	3	1	1971	µLÄÒÄy¤Î¥¼¸g¬FÄÒ±ÀÂË	0	0	293	0.3383	0	0	3	KMT	1	0.33359699	0.33359699	2.997628965	·s¥_¥«¤T­«°Ï¨¦¤ý¨½
·s¥_¥«¤T­«°Ï¤­¨¦¨½	±i®¶¶©	·s¥_¥«¤T­«°Ï¤­¨¦¨½±i®¶¶©	1	1	1958	µLÄÒÄy¤Î¥¼¸g¬FÄÒ±ÀÂË	0	0	1125	1	1	0	1	KMT	1	1	1	1	·s¥_¥«¤T­«°Ï¤­¨¦¨½
·s¥_¥«¤T­«°Ï¤¤¿³¨½	¾G¤å¨}	·s¥_¥«¤T­«°Ï¤¤¿³¨½¾G¤å¨}	1	1	1949	µLÄÒÄy¤Î¥¼¸g¬FÄÒ±ÀÂË	0	0	853	0.4191	0	0	2	KMT	1	0.17564481	0.51297345	1.94941863	·s¥_¥«¤T­«°Ï¤¤¿³¨½
·s¥_¥«¤T­«°Ï¤¤¿³¨½	¾G³¯²Q¬Â	·s¥_¥«¤T­«°Ï¤¤¿³¨½¾G³¯²Q¬Â	2	0	1957	µLÄÒÄy¤Î¥¼¸g¬FÄÒ±ÀÂË	0	0	1182	0.5808	1	0	2	KMT	1	0.51297345	0.51297345	1.94941863	·s¥_¥«¤T­«°Ï¤¤¿³¨½
·s¥_¥«¤T­«°Ï¼w«p¨½	§õºaªL	·s¥_¥«¤T­«°Ï¼w«p¨½§õºaªL	1	1	1952	µLÄÒÄy¤Î¥¼¸g¬FÄÒ±ÀÂË	0	0	296	1	1	0	1	KMT	1	1	1	1	·s¥_¥«¤T­«°Ï¼w«p¨½
·s¥_¥«¤T­«°Ï¦¨¥\¨½	³¯¥@©v	·s¥_¥«¤T­«°Ï¦¨¥\¨½³¯¥@©v	1	1	1966	µLÄÒÄy¤Î¥¼¸g¬FÄÒ±ÀÂË	0	0	1990	0.5885	1	0	3	KMT	1	0.34633225	0.4371993	2.28728637	·s¥_¥«¤T­«°Ï¦¨¥\¨½
·s¥_¥«¤T­«°Ï¦¨¥\¨½	³¯¸U±o	·s¥_¥«¤T­«°Ï¦¨¥\¨½³¯¸U±o	2	1	1956	µLÄÒÄy¤Î¥¼¸g¬FÄÒ±ÀÂË	0	0	885	0.2617	0	0	3	KMT	1	0.41481914	0.4371993	2.28728637	·s¥_¥«¤T­«°Ï¦¨¥\¨½
·s¥_¥«¤T­«°Ï¦¨¥\¨½	®}©_ºÖ	·s¥_¥«¤T­«°Ï¦¨¥\¨½®}©_ºÖ	3	1	1953	µLÄÒÄy¤Î¥¼¸g¬FÄÒ±ÀÂË	0	0	506	0.1496	0	0	3	KMT	1	0.4371993	0.4371993	2.28728637	·s¥_¥«¤T­«°Ï¦¨¥\¨½
·s¥_¥«¤T­«°ÏºÖ¬ç¨½	³¯¤Ñ´Ë	·s¥_¥«¤T­«°ÏºÖ¬ç¨½³¯¤Ñ´Ë	1	1	1962	µLÄÒÄy¤Î¥¼¸g¬FÄÒ±ÀÂË	0	0	1583	0.5031	1	0	3	KMT	1	0.25310961	0.3766399	2.65505593	·s¥_¥«¤T­«°ÏºÖ¬ç¨½
·s¥_¥«¤T­«°ÏºÖ¬ç¨½	¤ý·ç?	·s¥_¥«¤T­«°ÏºÖ¬ç¨½¤ý·ç?	2	1	1952	µLÄÒÄy¤Î¥¼¸g¬FÄÒ±ÀÂË	0	0	752	0.239	0	0	3	KMT	1	0.31023061	0.3766399	2.65505593	·s¥_¥«¤T­«°ÏºÖ¬ç¨½
·s¥_¥«¤T­«°ÏºÖ¬ç¨½	³\³Í¯ø	·s¥_¥«¤T­«°ÏºÖ¬ç¨½³\³Í¯ø	3	0	1975	¥Á¥D¶i¨BÄÒ	0	1	811	0.2577	0	0	3	KMT	1	0.3766399	0.3766399	2.65505593	·s¥_¥«¤T­«°ÏºÖ¬ç¨½
·s¥_¥«¤T­«°ÏºÖ¼w¨½	°ª³·®Z	·s¥_¥«¤T­«°ÏºÖ¼w¨½°ª³·®Z	1	0	1953	µLÄÒÄy¤Î¥¼¸g¬FÄÒ±ÀÂË	0	0	333	0.1421	0	0	3	KMT	1	0.02019241	0.39184518	2.552028329	·s¥_¥«¤T­«°ÏºÖ¼w¨½
·s¥_¥«¤T­«°ÏºÖ¼w¨½	³¯®¶¿Q	·s¥_¥«¤T­«°ÏºÖ¼w¨½³¯®¶¿Q	2	1	1959	¤¤°ê°ê¥ÁÄÒ	1	0	902	0.3851	0	0	3	KMT	1	0.16849442	0.39184518	2.552028329	·s¥_¥«¤T­«°ÏºÖ¼w¨½
·s¥_¥«¤T­«°ÏºÖ¼w¨½	§d?Ä_	·s¥_¥«¤T­«°ÏºÖ¼w¨½§d?Ä_	3	1	1958	µLÄÒÄy¤Î¥¼¸g¬FÄÒ±ÀÂË	0	0	1107	0.4726	1	0	3	KMT	1	0.39184518	0.39184518	2.552028329	·s¥_¥«¤T­«°ÏºÖ¼w¨½
·s¥_¥«¤T­«°ÏºÖ¥Á¨½	¾G·Ëªe	·s¥_¥«¤T­«°ÏºÖ¥Á¨½¾G·Ëªe	1	1	1951	¤¤°ê°ê¥ÁÄÒ	1	0	1028	0.4846	0	0	2	KMT	1	0.23483716	0.50037125	1.998516102	·s¥_¥«¤T­«°ÏºÖ¥Á¨½
·s¥_¥«¤T­«°ÏºÖ¥Á¨½	ªLÄRªK	·s¥_¥«¤T­«°ÏºÖ¥Á¨½ªLÄRªK	2	0	1968	¥Á¥D¶i¨BÄÒ	0	1	1093	0.5153	1	0	2	KMT	1	0.50037125	0.50037125	1.998516102	·s¥_¥«¤T­«°ÏºÖ¥Á¨½
·s¥_¥«¤T­«°Ï¹L¥Ð¨½	ªL¶³º~	·s¥_¥«¤T­«°Ï¹L¥Ð¨½ªL¶³º~	1	1	1953	µLÄÒÄy¤Î¥¼¸g¬FÄÒ±ÀÂË	0	0	2166	0.6583	1	0	2	KMT	1	0.43335889	0.55004945	1.818018362	·s¥_¥«¤T­«°Ï¹L¥Ð¨½
·s¥_¥«¤T­«°Ï¹L¥Ð¨½	§õ§E«i	·s¥_¥«¤T­«°Ï¹L¥Ð¨½§õ§E«i	2	1	1971	µLÄÒÄy¤Î¥¼¸g¬FÄÒ±ÀÂË	0	0	1124	0.3416	0	0	2	KMT	1	0.55004945	0.55004945	1.818018362	·s¥_¥«¤T­«°Ï¹L¥Ð¨½
·s¥_¥«¤T­«°ÏÀA¥Ð¨½	³¯¥Á­õ	·s¥_¥«¤T­«°ÏÀA¥Ð¨½³¯¥Á­õ	1	1	1971	¥Á¥D¶i¨BÄÒ	0	1	1058	1	1	0	1	KMT	1	1	1	1	·s¥_¥«¤T­«°ÏÀA¥Ð¨½
·s¥_¥«¤T­«°Ï­«©ú¨½	¨L¦¨ªv	·s¥_¥«¤T­«°Ï­«©ú¨½¨L¦¨ªv	1	1	1930	µLÄÒÄy¤Î¥¼¸g¬FÄÒ±ÀÂË	0	0	1780	1	1	0	1	KMT	1	1	1	1	·s¥_¥«¤T­«°Ï­«©ú¨½
·s¥_¥«¤T­«°Ï¥ú¥Ð¨½	§d³Ó¤å	·s¥_¥«¤T­«°Ï¥ú¥Ð¨½§d³Ó¤å	1	1	1960	µLÄÒÄy¤Î¥¼¸g¬FÄÒ±ÀÂË	0	0	2402	1	1	0	1	KMT	1	1	1	1	·s¥_¥«¤T­«°Ï¥ú¥Ð¨½
·s¥_¥«¤T­«°Ï¥ú¶§¨½	½²¤å­^	·s¥_¥«¤T­«°Ï¥ú¶§¨½½²¤å­^	1	1	1953	¥Á¥D¶i¨BÄÒ	0	1	2916	1	1	0	1	KMT	1	1	1	1	·s¥_¥«¤T­«°Ï¥ú¶§¨½
·s¥_¥«¤T­«°Ï¥Ð¤ß¨½	¹ù¿³¶W	·s¥_¥«¤T­«°Ï¥Ð¤ß¨½¹ù¿³¶W	1	1	1955	µLÄÒÄy¤Î¥¼¸g¬FÄÒ±ÀÂË	0	0	1388	0.5529	1	0	2	KMT	1	0.30569841	0.50550741	1.978210369	·s¥_¥«¤T­«°Ï¥Ð¤ß¨½
·s¥_¥«¤T­«°Ï¥Ð¤ß¨½	´å²M¥ú	·s¥_¥«¤T­«°Ï¥Ð¤ß¨½´å²M¥ú	2	1	1938	µLÄÒÄy¤Î¥¼¸g¬FÄÒ±ÀÂË	0	0	1122	0.447	0	0	2	KMT	1	0.50550741	0.50550741	1.978210369	·s¥_¥«¤T­«°Ï¥Ð¤ß¨½
·s¥_¥«¤T­«°ÏºÖ¥Ð¨½	ªL²M¦`	·s¥_¥«¤T­«°ÏºÖ¥Ð¨½ªL²M¦`	1	1	1953	µLÄÒÄy¤Î¥¼¸g¬FÄÒ±ÀÂË	0	0	1142	0.493	0	0	2	KMT	1	0.243049	0.49999661	2.00001356	·s¥_¥«¤T­«°ÏºÖ¥Ð¨½
·s¥_¥«¤T­«°ÏºÖ¥Ð¨½	´¿º~¬Ã	·s¥_¥«¤T­«°ÏºÖ¥Ð¨½´¿º~¬Ã	2	1	1949	µLÄÒÄy¤Î¥¼¸g¬FÄÒ±ÀÂË	0	0	1174	0.5069	1	0	2	KMT	1	0.49999661	0.49999661	2.00001356	·s¥_¥«¤T­«°ÏºÖ¥Ð¨½
·s¥_¥«¤T­«°Ï¥Ð¤¤¨½	¶À¬K²±	·s¥_¥«¤T­«°Ï¥Ð¤¤¨½¶À¬K²±	1	1	1956	¥Á¥D¶i¨BÄÒ	0	1	3022	1	1	0	1	KMT	1	1	1	1	·s¥_¥«¤T­«°Ï¥Ð¤¤¨½
·s¥_¥«¤T­«°Ï¥Ð¦w¨½	³¯¶À¨q¬ü	·s¥_¥«¤T­«°Ï¥Ð¦w¨½³¯¶À¨q¬ü	1	0	1956	µLÄÒÄy¤Î¥¼¸g¬FÄÒ±ÀÂË	0	0	1989	0.5381	1	0	2	KMT	1	0.28955161	0.50281085	1.988819454	·s¥_¥«¤T­«°Ï¥Ð¦w¨½
·s¥_¥«¤T­«°Ï¥Ð¦w¨½	³¯¤å±l	·s¥_¥«¤T­«°Ï¥Ð¦w¨½³¯¤å±l	2	1	1962	µLÄÒÄy¤Î¥¼¸g¬FÄÒ±ÀÂË	0	0	1707	0.4618	0	0	2	KMT	1	0.50281085	0.50281085	1.988819454	·s¥_¥«¤T­«°Ï¥Ð¦w¨½
·s¥_¥«¤T­«°Ï¤T¥Á¨½	ÃCÄ£©v	·s¥_¥«¤T­«°Ï¤T¥Á¨½ÃCÄ£©v	1	1	1951	µLÄÒÄy¤Î¥¼¸g¬FÄÒ±ÀÂË	0	0	1136	0.5734	1	0	2	KMT	1	0.32878756	0.51068981	1.958135801	·s¥_¥«¤T­«°Ï¤T¥Á¨½
·s¥_¥«¤T­«°Ï¤T¥Á¨½	ªò¥@«n	·s¥_¥«¤T­«°Ï¤T¥Á¨½ªò¥@«n	2	1	1948	µLÄÒÄy¤Î¥¼¸g¬FÄÒ±ÀÂË	0	0	845	0.4265	0	0	2	KMT	1	0.51068981	0.51068981	1.958135801	·s¥_¥«¤T­«°Ï¤T¥Á¨½
·s¥_¥«¤T­«°Ï¥ú©ú¨½	ªLª÷¬u	·s¥_¥«¤T­«°Ï¥ú©ú¨½ªLª÷¬u	1	1	1956	¥Á¥D¶i¨BÄÒ	0	1	808	0.2014	0	0	3	KMT	1	0.04056196	0.37680516	2.65389147	·s¥_¥«¤T­«°Ï¥ú©ú¨½
·s¥_¥«¤T­«°Ï¥ú©ú¨½	§õ¬F¹F	·s¥_¥«¤T­«°Ï¥ú©ú¨½§õ¬F¹F	2	1	1973	µLÄÒÄy¤Î¥¼¸g¬FÄÒ±ÀÂË	0	0	1977	0.4928	1	0	3	KMT	1	0.2834138	0.37680516	2.65389147	·s¥_¥«¤T­«°Ï¥ú©ú¨½
·s¥_¥«¤T­«°Ï¥ú©ú¨½	³¯¬K¦w	·s¥_¥«¤T­«°Ï¥ú©ú¨½³¯¬K¦w	3	1	1951	µLÄÒÄy¤Î¥¼¸g¬FÄÒ±ÀÂË	0	0	1226	0.3056	0	0	3	KMT	1	0.37680516	0.37680516	2.65389147	·s¥_¥«¤T­«°Ï¥ú©ú¨½
·s¥_¥«¤T­«°Ï¥ú¥¿¨½	·¨ªF¬Ý	·s¥_¥«¤T­«°Ï¥ú¥¿¨½·¨ªF¬Ý	1	1	1950	µLÄÒÄy¤Î¥¼¸g¬FÄÒ±ÀÂË	0	0	361	0.3166	0	0	2	KMT	1	0.10023556	0.56713445	1.763250319	·s¥_¥«¤T­«°Ï¥ú¥¿¨½
·s¥_¥«¤T­«°Ï¥ú¥¿¨½	³¯¦N¶¯	·s¥_¥«¤T­«°Ï¥ú¥¿¨½³¯¦N¶¯	2	1	1943	¤¤°ê°ê¥ÁÄÒ	1	0	779	0.6833	1	0	2	KMT	1	0.56713445	0.56713445	1.763250319	·s¥_¥«¤T­«°Ï¥ú¥¿¨½
·s¥_¥«¤T­«°Ï¦P¦w¨½	°ª±RÙy	·s¥_¥«¤T­«°Ï¦P¦w¨½°ª±RÙy	1	1	1952	¤¤°ê°ê¥ÁÄÒ	1	0	171	0.1828	0	0	3	KMT	1	0.03341584	0.37566242	2.661964431	·s¥_¥«¤T­«°Ï¦P¦w¨½
·s¥_¥«¤T­«°Ï¦P¦w¨½	³¯­º²M	·s¥_¥«¤T­«°Ï¦P¦w¨½³¯­º²M	2	1	1964	µLÄÒÄy¤Î¥¼¸g¬FÄÒ±ÀÂË	0	0	443	0.4737	1	0	3	KMT	1	0.25780753	0.37566242	2.661964431	·s¥_¥«¤T­«°Ï¦P¦w¨½
·s¥_¥«¤T­«°Ï¦P¦w¨½	ªL¨ä¼ü	·s¥_¥«¤T­«°Ï¦P¦w¨½ªL¨ä¼ü	3	1	1958	µLÄÒÄy¤Î¥¼¸g¬FÄÒ±ÀÂË	0	0	321	0.3433	0	0	3	KMT	1	0.37566242	0.37566242	2.661964431	·s¥_¥«¤T­«°Ï¦P¦w¨½
·s¥_¥«¤T­«°Ï¦P¼y¨½	±iµ¶²E	·s¥_¥«¤T­«°Ï¦P¼y¨½±iµ¶²E	1	0	1968	¤¤°ê°ê¥ÁÄÒ	1	0	972	1	1	0	1	KMT	1	1	1	1	·s¥_¥«¤T­«°Ï¦P¼y¨½
·s¥_¥«¤T­«°Ïµæ¼d¨½	±ç¶i¯q	·s¥_¥«¤T­«°Ïµæ¼d¨½±ç¶i¯q	1	1	1948	µLÄÒÄy¤Î¥¼¸g¬FÄÒ±ÀÂË	0	0	1228	1	1	0	1	KMT	1	1	1	1	·s¥_¥«¤T­«°Ïµæ¼d¨½
·s¥_¥«¤T­«°Ï¥Ã¬K¨½	§õÁo¥­	·s¥_¥«¤T­«°Ï¥Ã¬K¨½§õÁo¥­	1	1	1939	¤¤°ê°ê¥ÁÄÒ	1	0	1035	1	1	0	1	KMT	1	1	1	1	·s¥_¥«¤T­«°Ï¥Ã¬K¨½
·s¥_¥«¤T­«°Ï¤¤¥¿¨½	Áé©÷¤å	·s¥_¥«¤T­«°Ï¤¤¥¿¨½Áé©÷¤å	1	1	1956	µLÄÒÄy¤Î¥¼¸g¬FÄÒ±ÀÂË	0	0	312	0.3347	0	0	2	KMT	1	0.11202409	0.55451513	1.803377304	·s¥_¥«¤T­«°Ï¤¤¥¿¨½
·s¥_¥«¤T­«°Ï¤¤¥¿¨½	ÂÅ¤åÀs	·s¥_¥«¤T­«°Ï¤¤¥¿¨½ÂÅ¤åÀs	2	1	1959	µLÄÒÄy¤Î¥¼¸g¬FÄÒ±ÀÂË	0	0	620	0.6652	1	0	2	KMT	1	0.55451513	0.55451513	1.803377304	·s¥_¥«¤T­«°Ï¤¤¥¿¨½
·s¥_¥«¤T­«°Ï¦N§Q¨½	½²¿·¦p	·s¥_¥«¤T­«°Ï¦N§Q¨½½²¿·¦p	1	0	1953	µLÄÒÄy¤Î¥¼¸g¬FÄÒ±ÀÂË	0	0	576	0.5812	1	0	2	KMT	1	0.33779344	0.51310313	1.94892594	·s¥_¥«¤T­«°Ï¦N§Q¨½
·s¥_¥«¤T­«°Ï¦N§Q¨½	ªLºÖ¯q	·s¥_¥«¤T­«°Ï¦N§Q¨½ªLºÖ¯q	2	1	1951	µLÄÒÄy¤Î¥¼¸g¬FÄÒ±ÀÂË	0	0	415	0.4187	0	0	2	KMT	1	0.51310313	0.51310313	1.94892594	·s¥_¥«¤T­«°Ï¦N§Q¨½
·s¥_¥«¤T­«°Ï¤j¦P¨½	ªô­«¥ú	·s¥_¥«¤T­«°Ï¤j¦P¨½ªô­«¥ú	1	1	1938	µLÄÒÄy¤Î¥¼¸g¬FÄÒ±ÀÂË	0	0	207	0.1835	0	0	3	KMT	1	0.03367225	0.44975123	2.223451396	·s¥_¥«¤T­«°Ï¤j¦P¨½
·s¥_¥«¤T­«°Ï¤j¦P¨½	¯Î±X¥­	·s¥_¥«¤T­«°Ï¤j¦P¨½¯Î±X¥­	2	1	1956	µLÄÒÄy¤Î¥¼¸g¬FÄÒ±ÀÂË	0	0	231	0.2047	0	0	3	KMT	1	0.07557434	0.44975123	2.223451396	·s¥_¥«¤T­«°Ï¤j¦P¨½
·s¥_¥«¤T­«°Ï¤j¦P¨½	ªL¦¼Áo	·s¥_¥«¤T­«°Ï¤j¦P¨½ªL¦¼Áo	3	1	1951	µLÄÒÄy¤Î¥¼¸g¬FÄÒ±ÀÂË	0	0	690	0.6117	1	0	3	KMT	1	0.44975123	0.44975123	2.223451396	·s¥_¥«¤T­«°Ï¤j¦P¨½
·s¥_¥«¤T­«°Ï¤¤¥Á¨½	³\·É±Ó	·s¥_¥«¤T­«°Ï¤¤¥Á¨½³\·É±Ó	1	1	1950	µLÄÒÄy¤Î¥¼¸g¬FÄÒ±ÀÂË	0	0	767	1	1	0	1	KMT	1	1	1	1	·s¥_¥«¤T­«°Ï¤¤¥Á¨½
·s¥_¥«¤T­«°Ï¥­©M¨½	¶À¶i¦æ	·s¥_¥«¤T­«°Ï¥­©M¨½¶À¶i¦æ	1	1	1963	µLÄÒÄy¤Î¥¼¸g¬FÄÒ±ÀÂË	0	0	700	0.6862	1	0	2	KMT	1	0.47087044	0.56927813	1.756610604	·s¥_¥«¤T­«°Ï¥­©M¨½
·s¥_¥«¤T­«°Ï¥­©M¨½	³¢±Ò½å	·s¥_¥«¤T­«°Ï¥­©M¨½³¢±Ò½å	2	1	1959	µLÄÒÄy¤Î¥¼¸g¬FÄÒ±ÀÂË	0	0	320	0.3137	0	0	2	KMT	1	0.56927813	0.56927813	1.756610604	·s¥_¥«¤T­«°Ï¥­©M¨½
·s¥_¥«¤T­«°Ï¤j¦w¨½	±i§Ó©ú	·s¥_¥«¤T­«°Ï¤j¦w¨½±i§Ó©ú	1	1	1969	µLÄÒÄy¤Î¥¼¸g¬FÄÒ±ÀÂË	0	0	897	1	1	0	1	KMT	1	1	1	1	·s¥_¥«¤T­«°Ï¤j¦w¨½
·s¥_¥«¤T­«°Ï¤¯¼w¨½	³¯¬ü»T	·s¥_¥«¤T­«°Ï¤¯¼w¨½³¯¬ü»T	1	0	1948	¤¤°ê°ê¥ÁÄÒ	1	0	1121	1	1	0	1	KMT	1	1	1	1	·s¥_¥«¤T­«°Ï¤¯¼w¨½
·s¥_¥«¤T­«°Ï©¾§µ¨½	¬_©_¾ð	·s¥_¥«¤T­«°Ï©¾§µ¨½¬_©_¾ð	1	1	1969	µLÄÒÄy¤Î¥¼¸g¬FÄÒ±ÀÂË	0	0	551	0.4867	0	0	2	KMT	1	0.23687689	0.50025113	1.998995984	·s¥_¥«¤T­«°Ï©¾§µ¨½
·s¥_¥«¤T­«°Ï©¾§µ¨½	¤ý¥Ó¤å	·s¥_¥«¤T­«°Ï©¾§µ¨½¤ý¥Ó¤å	2	1	1930	¤¤°ê°ê¥ÁÄÒ	1	0	581	0.5132	1	0	2	KMT	1	0.50025113	0.50025113	1.998995984	·s¥_¥«¤T­«°Ï©¾§µ¨½
·s¥_¥«¤T­«°Ï¤¯¸q¨½	ªLªZ¶¯	·s¥_¥«¤T­«°Ï¤¯¸q¨½ªLªZ¶¯	1	1	1959	¤¤°ê°ê¥ÁÄÒ	1	0	612	1	1	0	1	KMT	1	1	1	1	·s¥_¥«¤T­«°Ï¤¯¸q¨½
·s¥_¥«¤T­«°Ï¥úºa¨½	¿à²MªQ	·s¥_¥«¤T­«°Ï¥úºa¨½¿à²MªQ	1	1	1951	¤¤°ê°ê¥ÁÄÒ	1	0	168	0.1802	0	0	3	KMT	1	0.03247204	0.43340621	2.307304272	·s¥_¥«¤T­«°Ï¥úºa¨½
·s¥_¥«¤T­«°Ï¥úºa¨½	¤ý¨Ó¬Ã	·s¥_¥«¤T­«°Ï¥úºa¨½¤ý¨Ó¬Ã	2	0	1965	µLÄÒÄy¤Î¥¼¸g¬FÄÒ±ÀÂË	0	0	550	0.5901	1	0	3	KMT	1	0.38069005	0.43340621	2.307304272	·s¥_¥«¤T­«°Ï¥úºa¨½
·s¥_¥«¤T­«°Ï¥úºa¨½	Â²²W¬u	·s¥_¥«¤T­«°Ï¥úºa¨½Â²²W¬u	3	1	1969	µLÄÒÄy¤Î¥¼¸g¬FÄÒ±ÀÂË	0	0	214	0.2296	0	0	3	KMT	1	0.43340621	0.43340621	2.307304272	·s¥_¥«¤T­«°Ï¥úºa¨½
·s¥_¥«¤T­«°Ï¥ú½÷¨½	§dªQ¬K	·s¥_¥«¤T­«°Ï¥ú½÷¨½§dªQ¬K	1	1	1956	¤¤°ê°ê¥ÁÄÒ	1	0	861	1	1	0	1	KMT	1	1	1	1	·s¥_¥«¤T­«°Ï¥ú½÷¨½
·s¥_¥«¤T­«°ÏºÖ¬P¨½	ªL®i½å	·s¥_¥«¤T­«°ÏºÖ¬P¨½ªL®i½å	1	1	1974	µLÄÒÄy¤Î¥¼¸g¬FÄÒ±ÀÂË	0	0	276	0.4517	0	0	2	KMT	1	0.20403289	0.50455613	1.981940047	·s¥_¥«¤T­«°ÏºÖ¬P¨½
·s¥_¥«¤T­«°ÏºÖ¬P¨½	³¢·R­ë	·s¥_¥«¤T­«°ÏºÖ¬P¨½³¢·R­ë	2	0	1940	µLÄÒÄy¤Î¥¼¸g¬FÄÒ±ÀÂË	0	0	335	0.5482	1	0	2	KMT	1	0.50455613	0.50455613	1.981940047	·s¥_¥«¤T­«°ÏºÖ¬P¨½
·s¥_¥«¤T­«°ÏºÖ§Q¨½	¼B¨ØµØ	·s¥_¥«¤T­«°ÏºÖ§Q¨½¼B¨ØµØ	1	0	1967	µLÄÒÄy¤Î¥¼¸g¬FÄÒ±ÀÂË	0	0	1074	1	1	0	1	KMT	1	1	1	1	·s¥_¥«¤T­«°ÏºÖ§Q¨½
·s¥_¥«¤T­«°Ï²M©M¨½	·¨ºÖ¨Ó	·s¥_¥«¤T­«°Ï²M©M¨½·¨ºÖ¨Ó	1	1	1939	µLÄÒÄy¤Î¥¼¸g¬FÄÒ±ÀÂË	0	0	1458	0.6706	1	0	2	KMT	1	0.44970436	0.55814285	1.791656025	·s¥_¥«¤T­«°Ï²M©M¨½
·s¥_¥«¤T­«°Ï²M©M¨½	³¯¤å§»	·s¥_¥«¤T­«°Ï²M©M¨½³¯¤å§»	2	1	1950	¥Á¥D¶i¨BÄÒ	0	1	716	0.3293	0	0	2	KMT	1	0.55814285	0.55814285	1.791656025	·s¥_¥«¤T­«°Ï²M©M¨½
·s¥_¥«¤T­«°Ï¥Ã¿³¨½	§õ¥É»ñ	·s¥_¥«¤T­«°Ï¥Ã¿³¨½§õ¥É»ñ	1	0	1958	µLÄÒÄy¤Î¥¼¸g¬FÄÒ±ÀÂË	0	0	697	1	1	0	1	KMT	1	1	1	1	·s¥_¥«¤T­«°Ï¥Ã¿³¨½
·s¥_¥«¤T­«°Ï¤¤¤s¨½	³¢®Ê	·s¥_¥«¤T­«°Ï¤¤¤s¨½³¢®Ê	1	1	1943	¤¤°ê°ê¥ÁÄÒ	1	0	1216	1	1	0	1	KMT	1	1	1	1	·s¥_¥«¤T­«°Ï¤¤¤s¨½
·s¥_¥«¤T­«°Ï¤j¶é¨½	³¯´¼¥þ	·s¥_¥«¤T­«°Ï¤j¶é¨½³¯´¼¥þ	1	1	1952	µLÄÒÄy¤Î¥¼¸g¬FÄÒ±ÀÂË	0	0	875	0.552	1	0	3	KMT	1	0.304704	0.42695633	2.342159911	·s¥_¥«¤T­«°Ï¤j¶é¨½
·s¥_¥«¤T­«°Ï¤j¶é¨½	ÁÂ­YÄ«	·s¥_¥«¤T­«°Ï¤j¶é¨½ÁÂ­YÄ«	2	0	1972	µLÄÒÄy¤Î¥¼¸g¬FÄÒ±ÀÂË	0	0	189	0.1192	0	0	3	KMT	1	0.31891264	0.42695633	2.342159911	·s¥_¥«¤T­«°Ï¤j¶é¨½
·s¥_¥«¤T­«°Ï¤j¶é¨½	¬x¬üÆq	·s¥_¥«¤T­«°Ï¤j¶é¨½¬x¬üÆq	3	0	1963	µLÄÒÄy¤Î¥¼¸g¬FÄÒ±ÀÂË	0	0	521	0.3287	0	0	3	KMT	1	0.42695633	0.42695633	2.342159911	·s¥_¥«¤T­«°Ï¤j¶é¨½
·s¥_¥«¤T­«°Ï°ê¶©¨½	³Å®]ª@	·s¥_¥«¤T­«°Ï°ê¶©¨½³Å®]ª@	1	1	1956	µLÄÒÄy¤Î¥¼¸g¬FÄÒ±ÀÂË	0	0	922	0.5259	1	0	2	KMT	1	0.27657081	0.50124681	1.995025165	·s¥_¥«¤T­«°Ï°ê¶©¨½
·s¥_¥«¤T­«°Ï°ê¶©¨½	Â²¯À®Z	·s¥_¥«¤T­«°Ï°ê¶©¨½Â²¯À®Z	2	0	1955	¥Á¥D¶i¨BÄÒ	0	1	831	0.474	0	0	2	KMT	1	0.50124681	0.50124681	1.995025165	·s¥_¥«¤T­«°Ï°ê¶©¨½
·s¥_¥«¤T­«°Ï­«¶§¨½	³¯¿³¹A	·s¥_¥«¤T­«°Ï­«¶§¨½³¯¿³¹A	1	1	1953	¥Á¥D¶i¨BÄÒ	0	1	1357	0.6109	1	0	2	KMT	1	0.37319881	0.52451981	1.906505686	·s¥_¥«¤T­«°Ï­«¶§¨½
·s¥_¥«¤T­«°Ï­«¶§¨½	¨H¤ôÄ_	·s¥_¥«¤T­«°Ï­«¶§¨½¨H¤ôÄ_	2	1	1956	µLÄÒÄy¤Î¥¼¸g¬FÄÒ±ÀÂË	0	0	864	0.389	0	0	2	KMT	1	0.52451981	0.52451981	1.906505686	·s¥_¥«¤T­«°Ï­«¶§¨½
·s¥_¥«¤T­«°Ï¥Á¥Í¨½	³¯ÄRµØ	·s¥_¥«¤T­«°Ï¥Á¥Í¨½³¯ÄRµØ	1	0	1961	¥Á¥D¶i¨BÄÒ	0	1	1525	0.5631	1	0	2	KMT	1	0.31708161	0.50787585	1.968985137	·s¥_¥«¤T­«°Ï¥Á¥Í¨½
·s¥_¥«¤T­«°Ï¥Á¥Í¨½	¨HÄ_¦Ì	·s¥_¥«¤T­«°Ï¥Á¥Í¨½¨HÄ_¦Ì	2	0	1951	µLÄÒÄy¤Î¥¼¸g¬FÄÒ±ÀÂË	0	0	1183	0.4368	0	0	2	KMT	1	0.50787585	0.50787585	1.968985137	·s¥_¥«¤T­«°Ï¥Á¥Í¨½
·s¥_¥«¤T­«°Ï­«·s¨½	¬_ªa§µ	·s¥_¥«¤T­«°Ï­«·s¨½¬_ªa§µ	1	1	1954	µLÄÒÄy¤Î¥¼¸g¬FÄÒ±ÀÂË	0	0	804	1	1	0	1	KMT	1	1	1	1	·s¥_¥«¤T­«°Ï­«·s¨½
·s¥_¥«¤T­«°Ï¥¿¼w¨½	¿à¾ðªL	·s¥_¥«¤T­«°Ï¥¿¼w¨½¿à¾ðªL	1	1	1952	¤¤°ê°ê¥ÁÄÒ	1	0	592	1	1	0	1	KMT	1	1	1	1	·s¥_¥«¤T­«°Ï¥¿¼w¨½
·s¥_¥«¤T­«°Ï¥¿¸q¨½	¶À¯P¤s	·s¥_¥«¤T­«°Ï¥¿¸q¨½¶À¯P¤s	1	1	1965	µLÄÒÄy¤Î¥¼¸g¬FÄÒ±ÀÂË	0	0	1088	1	1	0	1	KMT	1	1	1	1	·s¥_¥«¤T­«°Ï¥¿¸q¨½
·s¥_¥«¤T­«°Ï¥¿¦w¨½	°ª¯À±ö	·s¥_¥«¤T­«°Ï¥¿¦w¨½°ª¯À±ö	1	0	1965	µLÄÒÄy¤Î¥¼¸g¬FÄÒ±ÀÂË	0	0	1141	1	1	0	1	KMT	1	1	1	1	·s¥_¥«¤T­«°Ï¥¿¦w¨½
·s¥_¥«¤T­«°Ï¦Û±j¨½	®]²K¤õ	·s¥_¥«¤T­«°Ï¦Û±j¨½®]²K¤õ	1	1	1951	µLÄÒÄy¤Î¥¼¸g¬FÄÒ±ÀÂË	0	0	626	0.5012	1	0	3	KMT	1	0.25120144	0.41154473	2.429869531	·s¥_¥«¤T­«°Ï¦Û±j¨½
·s¥_¥«¤T­«°Ï¦Û±j¨½	ÃQºÉ©¾	·s¥_¥«¤T­«°Ï¦Û±j¨½ÃQºÉ©¾	2	1	1958	µLÄÒÄy¤Î¥¼¸g¬FÄÒ±ÀÂË	0	0	144	0.1152	0	0	3	KMT	1	0.26447248	0.41154473	2.429869531	·s¥_¥«¤T­«°Ï¦Û±j¨½
·s¥_¥«¤T­«°Ï¦Û±j¨½	¤ýÂE»«	·s¥_¥«¤T­«°Ï¦Û±j¨½¤ýÂE»«	3	1	1970	µLÄÒÄy¤Î¥¼¸g¬FÄÒ±ÀÂË	0	0	479	0.3835	0	0	3	KMT	1	0.41154473	0.41154473	2.429869531	·s¥_¥«¤T­«°Ï¦Û±j¨½
·s¥_¥«¤T­«°Ï¤å¤Æ¨½	§d©÷½å	·s¥_¥«¤T­«°Ï¤å¤Æ¨½§d©÷½å	1	1	1975	¥Á¥D¶i¨BÄÒ	0	1	623	0.4139	0	0	2	KMT	1	0.17131321	0.51470921	1.942844582	·s¥_¥«¤T­«°Ï¤å¤Æ¨½
·s¥_¥«¤T­«°Ï¤å¤Æ¨½	¤ý¿üºa	·s¥_¥«¤T­«°Ï¤å¤Æ¨½¤ý¿üºa	2	1	1951	µLÄÒÄy¤Î¥¼¸g¬FÄÒ±ÀÂË	0	0	882	0.586	1	0	2	KMT	1	0.51470921	0.51470921	1.942844582	·s¥_¥«¤T­«°Ï¤å¤Æ¨½
·s¥_¥«¤T­«°Ï¤¤¥¡¨½	¶¾±ö¿¶	·s¥_¥«¤T­«°Ï¤¤¥¡¨½¶¾±ö¿¶	1	0	1957	µLÄÒÄy¤Î¥¼¸g¬FÄÒ±ÀÂË	0	0	359	0.3124	0	0	3	KMT	1	0.09759376	0.34086242	2.933734966	·s¥_¥«¤T­«°Ï¤¤¥¡¨½
·s¥_¥«¤T­«°Ï¤¤¥¡¨½	§õ¤ô¤s	·s¥_¥«¤T­«°Ï¤¤¥¡¨½§õ¤ô¤s	2	1	1955	µLÄÒÄy¤Î¥¼¸g¬FÄÒ±ÀÂË	0	0	463	0.4029	1	0	3	KMT	1	0.25992217	0.34086242	2.933734966	·s¥_¥«¤T­«°Ï¤¤¥¡¨½
·s¥_¥«¤T­«°Ï¤¤¥¡¨½	§õªLÄR´f	·s¥_¥«¤T­«°Ï¤¤¥¡¨½§õªLÄR´f	3	0	1946	µLÄÒÄy¤Î¥¼¸g¬FÄÒ±ÀÂË	0	0	327	0.2845	0	0	3	KMT	1	0.34086242	0.34086242	2.933734966	·s¥_¥«¤T­«°Ï¤¤¥¡¨½
·s¥_¥«¤T­«°ÏÂù¶é¨½	ªLªÃº³	·s¥_¥«¤T­«°ÏÂù¶é¨½ªLªÃº³	1	1	1952	¤¤°ê°ê¥ÁÄÒ	1	0	479	1	1	0	1	KMT	1	1	1	1	·s¥_¥«¤T­«°ÏÂù¶é¨½
·s¥_¥«¤T­«°ÏÀA³q¨½	ªLÞm°]	·s¥_¥«¤T­«°ÏÀA³q¨½ªLÞm°]	1	1	1960	µLÄÒÄy¤Î¥¼¸g¬FÄÒ±ÀÂË	0	0	864	1	1	0	1	KMT	1	1	1	1	·s¥_¥«¤T­«°ÏÀA³q¨½
·s¥_¥«¤T­«°ÏÀA¦w¨½	½²¤j´¤	·s¥_¥«¤T­«°ÏÀA¦w¨½½²¤j´¤	1	1	1950	µLÄÒÄy¤Î¥¼¸g¬FÄÒ±ÀÂË	0	0	507	0.4011	0	0	2	KMT	1	0.16088121	0.51944265	1.92514034	·s¥_¥«¤T­«°ÏÀA¦w¨½
·s¥_¥«¤T­«°ÏÀA¦w¨½	§d²Q¬Â	·s¥_¥«¤T­«°ÏÀA¦w¨½§d²Q¬Â	2	0	1962	µLÄÒÄy¤Î¥¼¸g¬FÄÒ±ÀÂË	0	0	757	0.5988	1	0	2	KMT	1	0.51944265	0.51944265	1.92514034	·s¥_¥«¤T­«°ÏÀA¦w¨½
·s¥_¥«¤T­«°Ïªø¦w¨½	§õ©v¯P	·s¥_¥«¤T­«°Ïªø¦w¨½§õ©v¯P	1	1	1945	µLÄÒÄy¤Î¥¼¸g¬FÄÒ±ÀÂË	0	0	1161	1	1	0	1	KMT	1	1	1	1	·s¥_¥«¤T­«°Ïªø¦w¨½
·s¥_¥«¤T­«°Ï¥úµØ¨½	§f®ÛÂ×	·s¥_¥«¤T­«°Ï¥úµØ¨½§f®ÛÂ×	1	1	1950	µLÄÒÄy¤Î¥¼¸g¬FÄÒ±ÀÂË	0	0	465	0.3647	0	0	2	KMT	1	0.13300609	0.53648513	1.863984562	·s¥_¥«¤T­«°Ï¥úµØ¨½
·s¥_¥«¤T­«°Ï¥úµØ¨½	²ø¬L½å	·s¥_¥«¤T­«°Ï¥úµØ¨½²ø¬L½å	2	1	1965	µLÄÒÄy¤Î¥¼¸g¬FÄÒ±ÀÂË	0	0	810	0.6352	1	0	2	KMT	1	0.53648513	0.53648513	1.863984562	·s¥_¥«¤T­«°Ï¥úµØ¨½
·s¥_¥«¤T­«°Ïªø¥Í¨½	±i¶®´@	·s¥_¥«¤T­«°Ïªø¥Í¨½±i¶®´@	1	0	1967	µLÄÒÄy¤Î¥¼¸g¬FÄÒ±ÀÂË	0	0	289	0.4784	0	0	2	KMT	1	0.22886656	0.50082881	1.996690246	·s¥_¥«¤T­«°Ïªø¥Í¨½
·s¥_¥«¤T­«°Ïªø¥Í¨½	¤ýªü¨|	·s¥_¥«¤T­«°Ïªø¥Í¨½¤ýªü¨|	2	1	1951	µLÄÒÄy¤Î¥¼¸g¬FÄÒ±ÀÂË	0	0	315	0.5215	1	0	2	KMT	1	0.50082881	0.50082881	1.996690246	·s¥_¥«¤T­«°Ïªø¥Í¨½
·s¥_¥«¤T­«°Ï¶}¤¸¨½	¼ï¯À¬Ã	·s¥_¥«¤T­«°Ï¶}¤¸¨½¼ï¯À¬Ã	1	0	1956	µLÄÒÄy¤Î¥¼¸g¬FÄÒ±ÀÂË	0	0	674	0.6948	1	0	2	KMT	1	0.48274704	0.57583305	1.736614458	·s¥_¥«¤T­«°Ï¶}¤¸¨½
·s¥_¥«¤T­«°Ï¶}¤¸¨½	ªL©v¥­	·s¥_¥«¤T­«°Ï¶}¤¸¨½ªL©v¥­	2	1	1945	¥Á¥D¶i¨BÄÒ	0	1	296	0.3051	0	0	2	KMT	1	0.57583305	0.57583305	1.736614458	·s¥_¥«¤T­«°Ï¶}¤¸¨½
·s¥_¥«¤T­«°Ï¤j¼w¨½	¸­µâ	·s¥_¥«¤T­«°Ï¤j¼w¨½¸­µâ	1	0	1950	µLÄÒÄy¤Î¥¼¸g¬FÄÒ±ÀÂË	0	0	417	0.7942	1	0	2	KMT	1	0.63075364	0.67306613	1.48573811	·s¥_¥«¤T­«°Ï¤j¼w¨½
·s¥_¥«¤T­«°Ï¤j¼w¨½	±i¼yÂE	·s¥_¥«¤T­«°Ï¤j¼w¨½±i¼yÂE	2	1	1953	µLÄÒÄy¤Î¥¼¸g¬FÄÒ±ÀÂË	0	0	108	0.2057	0	0	2	KMT	1	0.67306613	0.67306613	1.48573811	·s¥_¥«¤T­«°Ï¤j¼w¨½
·s¥_¥«¤T­«°Ïªø¤¸¨½	±çÁo©ú	·s¥_¥«¤T­«°Ïªø¤¸¨½±çÁo©ú	1	1	1961	µLÄÒÄy¤Î¥¼¸g¬FÄÒ±ÀÂË	0	0	1384	1	1	0	1	KMT	1	1	1	1	·s¥_¥«¤T­«°Ïªø¤¸¨½
·s¥_¥«¤T­«°Ïªø¦¿¨½	­ð©úÁo	·s¥_¥«¤T­«°Ïªø¦¿¨½­ð©úÁo	1	1	1961	µLÄÒÄy¤Î¥¼¸g¬FÄÒ±ÀÂË	0	0	1143	1	1	0	1	KMT	1	1	1	1	·s¥_¥«¤T­«°Ïªø¦¿¨½
·s¥_¥«¤T­«°Ïªø®õ¨½	³¯¤åÂ§	·s¥_¥«¤T­«°Ïªø®õ¨½³¯¤åÂ§	1	1	1953	µLÄÒÄy¤Î¥¼¸g¬FÄÒ±ÀÂË	0	0	1254	1	1	0	1	KMT	1	1	1	1	·s¥_¥«¤T­«°Ïªø®õ¨½
·s¥_¥«¤T­«°ÏªøºÖ¨½	ªL¹Ø	·s¥_¥«¤T­«°ÏªøºÖ¨½ªL¹Ø	1	1	1952	µLÄÒÄy¤Î¥¼¸g¬FÄÒ±ÀÂË	0	0	846	1	1	0	1	KMT	1	1	1	1	·s¥_¥«¤T­«°ÏªøºÖ¨½
·s¥_¥«¤T­«°Ï¤¶¹Ø¨½	¤ý²»¸q	·s¥_¥«¤T­«°Ï¤¶¹Ø¨½¤ý²»¸q	1	1	1962	µLÄÒÄy¤Î¥¼¸g¬FÄÒ±ÀÂË	0	0	206	0.2503	0	0	4	KMT	1	0.06265009	0.30088793	3.323496559	·s¥_¥«¤T­«°Ï¤¶¹Ø¨½
·s¥_¥«¤T­«°Ï¤¶¹Ø¨½	ªL§Ó²»	·s¥_¥«¤T­«°Ï¤¶¹Ø¨½ªL§Ó²»	2	1	1956	µLÄÒÄy¤Î¥¼¸g¬FÄÒ±ÀÂË	0	0	283	0.3438	1	0	4	KMT	1	0.18084853	0.30088793	3.323496559	·s¥_¥«¤T­«°Ï¤¶¹Ø¨½
·s¥_¥«¤T­«°Ï¤¶¹Ø¨½	§ù«º¼ü	·s¥_¥«¤T­«°Ï¤¶¹Ø¨½§ù«º¼ü	3	0	1983	¥Á¥D¶i¨BÄÒ	0	1	280	0.3402	0	0	4	KMT	1	0.29658457	0.30088793	3.323496559	·s¥_¥«¤T­«°Ï¤¶¹Ø¨½
·s¥_¥«¤T­«°Ï¤¶¹Ø¨½	³¢ºaºÖ	·s¥_¥«¤T­«°Ï¤¶¹Ø¨½³¢ºaºÖ	4	1	1960	µLÄÒÄy¤Î¥¼¸g¬FÄÒ±ÀÂË	0	0	54	0.0656	0	0	4	KMT	1	0.30088793	0.30088793	3.323496559	·s¥_¥«¤T­«°Ï¤¶¹Ø¨½
·s¥_¥«¤T­«°Ï¸U¹Ø¨½	¤ý²WÃÙ	·s¥_¥«¤T­«°Ï¸U¹Ø¨½¤ý²WÃÙ	1	1	1958	µLÄÒÄy¤Î¥¼¸g¬FÄÒ±ÀÂË	0	0	1187	1	1	0	1	KMT	1	1	1	1	·s¥_¥«¤T­«°Ï¸U¹Ø¨½
·s¥_¥«¤T­«°ÏÀA¦¿¨½	¦¿­Z¶©	·s¥_¥«¤T­«°ÏÀA¦¿¨½¦¿­Z¶©	1	1	1964	µLÄÒÄy¤Î¥¼¸g¬FÄÒ±ÀÂË	0	0	768	0.5271	1	0	2	KMT	1	0.27783441	0.50137425	1.994518067	·s¥_¥«¤T­«°ÏÀA¦¿¨½
·s¥_¥«¤T­«°ÏÀA¦¿¨½	¥Ð¦w­}	·s¥_¥«¤T­«°ÏÀA¦¿¨½¥Ð¦w­}	2	1	1964	µLÄÒÄy¤Î¥¼¸g¬FÄÒ±ÀÂË	0	0	689	0.4728	0	0	2	KMT	1	0.50137425	0.50137425	1.994518067	·s¥_¥«¤T­«°ÏÀA¦¿¨½
·s¥_¥«¤T­«°ÏÀsÀØ¨½	ªL¿³¶©	·s¥_¥«¤T­«°ÏÀsÀØ¨½ªL¿³¶©	1	1	1970	¥Á¥D¶i¨BÄÒ	0	1	667	0.3202	0	0	3	KMT	1	0.10252804	0.33355373	2.998017741	·s¥_¥«¤T­«°ÏÀsÀØ¨½
·s¥_¥«¤T­«°ÏÀsÀØ¨½	³¯ª÷¼w	·s¥_¥«¤T­«°ÏÀsÀØ¨½³¯ª÷¼w	2	1	1952	µLÄÒÄy¤Î¥¼¸g¬FÄÒ±ÀÂË	0	0	716	0.3437	1	0	3	KMT	1	0.22065773	0.33355373	2.998017741	·s¥_¥«¤T­«°ÏÀsÀØ¨½
·s¥_¥«¤T­«°ÏÀsÀØ¨½	©P©ø¼ü	·s¥_¥«¤T­«°ÏÀsÀØ¨½©P©ø¼ü	3	1	1970	µLÄÒÄy¤Î¥¼¸g¬FÄÒ±ÀÂË	0	0	700	0.336	0	0	3	KMT	1	0.33355373	0.33355373	2.998017741	·s¥_¥«¤T­«°ÏÀsÀØ¨½
·s¥_¥«¤T­«°ÏÀsªù¨½	§d?¹ü	·s¥_¥«¤T­«°ÏÀsªù¨½§d?¹ü	1	1	1965	µLÄÒÄy¤Î¥¼¸g¬FÄÒ±ÀÂË	0	0	869	0.7421	1	0	2	KMT	1	0.55071241	0.61717325	1.620290575	·s¥_¥«¤T­«°ÏÀsªù¨½
·s¥_¥«¤T­«°ÏÀsªù¨½	½²¼w¸t	·s¥_¥«¤T­«°ÏÀsªù¨½½²¼w¸t	2	1	1949	µLÄÒÄy¤Î¥¼¸g¬FÄÒ±ÀÂË	0	0	302	0.2578	0	0	2	KMT	1	0.61717325	0.61717325	1.620290575	·s¥_¥«¤T­«°ÏÀsªù¨½
·s¥_¥«¤T­«°Ï¨q¦¿¨½	¾G±o¿³	·s¥_¥«¤T­«°Ï¨q¦¿¨½¾G±o¿³	1	1	1954	µLÄÒÄy¤Î¥¼¸g¬FÄÒ±ÀÂË	0	0	764	1	1	0	1	KMT	1	1	1	1	·s¥_¥«¤T­«°Ï¨q¦¿¨½
·s¥_¥«¤T­«°Ï«³¹Ø¨½	³¯ªF¶³	·s¥_¥«¤T­«°Ï«³¹Ø¨½³¯ªF¶³	1	1	1958	¥Á¥D¶i¨BÄÒ	0	1	844	1	1	0	1	KMT	1	1	1	1	·s¥_¥«¤T­«°Ï«³¹Ø¨½
·s¥_¥«¤T­«°Ï¤T¦w¨½	§d·ç±l	·s¥_¥«¤T­«°Ï¤T¦w¨½§d·ç±l	1	1	1955	¥Á¥D¶i¨BÄÒ	0	1	630	0.3797	0	0	2	KMT	1	0.14417209	0.52882013	1.891002145	·s¥_¥«¤T­«°Ï¤T¦w¨½
·s¥_¥«¤T­«°Ï¤T¦w¨½	½²¬F©v	·s¥_¥«¤T­«°Ï¤T¦w¨½½²¬F©v	2	1	1951	µLÄÒÄy¤Î¥¼¸g¬FÄÒ±ÀÂË	0	0	1029	0.6202	1	0	2	KMT	1	0.52882013	0.52882013	1.891002145	·s¥_¥«¤T­«°Ï¤T¦w¨½
·s¥_¥«¤T­«°ÏºÖ¦w¨½	·¨¼y¸Î	·s¥_¥«¤T­«°ÏºÖ¦w¨½·¨¼y¸Î	1	1	1953	µLÄÒÄy¤Î¥¼¸g¬FÄÒ±ÀÂË	0	0	813	0.4354	0	0	2	KMT	1	0.18957316	0.50823341	1.967599887	·s¥_¥«¤T­«°ÏºÖ¦w¨½
·s¥_¥«¤T­«°ÏºÖ¦w¨½	¬I¥¿³q	·s¥_¥«¤T­«°ÏºÖ¦w¨½¬I¥¿³q	2	1	1961	µLÄÒÄy¤Î¥¼¸g¬FÄÒ±ÀÂË	0	0	1054	0.5645	1	0	2	KMT	1	0.50823341	0.50823341	1.967599887	·s¥_¥«¤T­«°ÏºÖ¦w¨½
·s¥_¥«¤T­«°Ï«H¦w¨½	¶À¸t°ê	·s¥_¥«¤T­«°Ï«H¦w¨½¶À¸t°ê	1	1	1958	µLÄÒÄy¤Î¥¼¸g¬FÄÒ±ÀÂË	0	0	744	0.6174	1	0	2	KMT	1	0.38118276	0.52748901	1.895774094	·s¥_¥«¤T­«°Ï«H¦w¨½
·s¥_¥«¤T­«°Ï«H¦w¨½	±i©¾¼y	·s¥_¥«¤T­«°Ï«H¦w¨½±i©¾¼y	2	1	1968	µLÄÒÄy¤Î¥¼¸g¬FÄÒ±ÀÂË	0	0	461	0.3825	0	0	2	KMT	1	0.52748901	0.52748901	1.895774094	·s¥_¥«¤T­«°Ï«H¦w¨½
·s¥_¥«¤T­«°Ï¦w¼y¨½	ªLª÷¨â	·s¥_¥«¤T­«°Ï¦w¼y¨½ªLª÷¨â	1	1	1950	µLÄÒÄy¤Î¥¼¸g¬FÄÒ±ÀÂË	0	0	1126	1	1	0	1	KMT	1	1	1	1	·s¥_¥«¤T­«°Ï¦w¼y¨½
·s¥_¥«¤T­«°Ï©¯ºÖ¨½	§õ®¦½ç	·s¥_¥«¤T­«°Ï©¯ºÖ¨½§õ®¦½ç	1	1	1966	µLÄÒÄy¤Î¥¼¸g¬FÄÒ±ÀÂË	0	0	1748	0.6402	1	0	2	KMT	1	0.40985604	0.53924013	1.854461388	·s¥_¥«¤T­«°Ï©¯ºÖ¨½
·s¥_¥«¤T­«°Ï©¯ºÖ¨½	³¢¥V½ç	·s¥_¥«¤T­«°Ï©¯ºÖ¨½³¢¥V½ç	2	1	1968	µLÄÒÄy¤Î¥¼¸g¬FÄÒ±ÀÂË	0	0	982	0.3597	0	0	2	KMT	1	0.53924013	0.53924013	1.854461388	·s¥_¥«¤T­«°Ï©¯ºÖ¨½
·s¥_¥«¤T­«°Ï¤»¦X¨½	³¯»ÊÂ×	·s¥_¥«¤T­«°Ï¤»¦X¨½³¯»ÊÂ×	1	1	1952	¤¤°ê°ê¥ÁÄÒ	1	0	1832	1	1	0	1	KMT	1	1	1	1	·s¥_¥«¤T­«°Ï¤»¦X¨½
·s¥_¥«¤T­«°Ï¤»ºÖ¨½	¬x¶¶«G	·s¥_¥«¤T­«°Ï¤»ºÖ¨½¬x¶¶«G	1	1	1960	µLÄÒÄy¤Î¥¼¸g¬FÄÒ±ÀÂË	0	0	2283	0.7026	1	0	2	KMT	1	0.49364676	0.58203405	1.71811254	·s¥_¥«¤T­«°Ï¤»ºÖ¨½
·s¥_¥«¤T­«°Ï¤»ºÖ¨½	§õ°ê©ú	·s¥_¥«¤T­«°Ï¤»ºÖ¨½§õ°ê©ú	2	1	1954	µLÄÒÄy¤Î¥¼¸g¬FÄÒ±ÀÂË	0	0	966	0.2973	0	0	2	KMT	1	0.58203405	0.58203405	1.71811254	·s¥_¥«¤T­«°Ï¤»ºÖ¨½
·s¥_¥«¤T­«°Ï¶¶¼w¨½	§õÂE§Ó	·s¥_¥«¤T­«°Ï¶¶¼w¨½§õÂE§Ó	1	1	1956	µLÄÒÄy¤Î¥¼¸g¬FÄÒ±ÀÂË	0	0	910	0.6115	1	0	2	KMT	1	0.37393225	0.52478681	1.905535697	·s¥_¥«¤T­«°Ï¶¶¼w¨½
·s¥_¥«¤T­«°Ï¶¶¼w¨½	§õ«i¬K	·s¥_¥«¤T­«°Ï¶¶¼w¨½§õ«i¬K	2	1	1965	µLÄÒÄy¤Î¥¼¸g¬FÄÒ±ÀÂË	0	0	578	0.3884	0	0	2	KMT	1	0.52478681	0.52478681	1.905535697	·s¥_¥«¤T­«°Ï¶¶¼w¨½
·s¥_¥«¤T­«°Ï©Ó¼w¨½	§d¬FÅv	·s¥_¥«¤T­«°Ï©Ó¼w¨½§d¬FÅv	1	1	1967	µLÄÒÄy¤Î¥¼¸g¬FÄÒ±ÀÂË	0	0	861	0.7253	1	0	2	KMT	1	0.52606009	0.60146525	1.662606443	·s¥_¥«¤T­«°Ï©Ó¼w¨½
·s¥_¥«¤T­«°Ï©Ó¼w¨½	½²³Ó¤å	·s¥_¥«¤T­«°Ï©Ó¼w¨½½²³Ó¤å	2	1	1947	µLÄÒÄy¤Î¥¼¸g¬FÄÒ±ÀÂË	0	0	326	0.2746	0	0	2	KMT	1	0.60146525	0.60146525	1.662606443	·s¥_¥«¤T­«°Ï©Ó¼w¨½
·s¥_¥«¤T­«°Ï·ç¼w¨½	³¯¥K§»	·s¥_¥«¤T­«°Ï·ç¼w¨½³¯¥K§»	1	1	1955	µLÄÒÄy¤Î¥¼¸g¬FÄÒ±ÀÂË	0	0	820	0.5518	1	0	2	KMT	1	0.30448324	0.50527685	1.979113035	·s¥_¥«¤T­«°Ï·ç¼w¨½
·s¥_¥«¤T­«°Ï·ç¼w¨½	³¯·¨¤ëµ^	·s¥_¥«¤T­«°Ï·ç¼w¨½³¯·¨¤ëµ^	2	0	1955	µLÄÒÄy¤Î¥¼¸g¬FÄÒ±ÀÂË	0	0	666	0.4481	0	0	2	KMT	1	0.50527685	0.50527685	1.979113035	·s¥_¥«¤T­«°Ï·ç¼w¨½
·s¥_¥«¤T­«°Ï±R¼w¨½	§dªÚ©ú	·s¥_¥«¤T­«°Ï±R¼w¨½§dªÚ©ú	1	1	1961	µLÄÒÄy¤Î¥¼¸g¬FÄÒ±ÀÂË	0	0	942	0.3561	0	0	3	KMT	1	0.12680721	0.34367915	2.909690623	·s¥_¥«¤T­«°Ï±R¼w¨½
·s¥_¥«¤T­«°Ï±R¼w¨½	§õ¤B¶Q	·s¥_¥«¤T­«°Ï±R¼w¨½§õ¤B¶Q	2	1	1968	µLÄÒÄy¤Î¥¼¸g¬FÄÒ±ÀÂË	0	0	1035	0.3913	1	0	3	KMT	1	0.2799229	0.34367915	2.909690623	·s¥_¥«¤T­«°Ï±R¼w¨½
·s¥_¥«¤T­«°Ï±R¼w¨½	§õ²Ð´Ë	·s¥_¥«¤T­«°Ï±R¼w¨½§õ²Ð´Ë	3	1	1941	¥Á¥D¶i¨BÄÒ	0	1	668	0.2525	0	0	3	KMT	1	0.34367915	0.34367915	2.909690623	·s¥_¥«¤T­«°Ï±R¼w¨½
·s¥_¥«¤T­«°Ï«p¼w¨½	³¯®¶¿³	·s¥_¥«¤T­«°Ï«p¼w¨½³¯®¶¿³	1	1	1962	µLÄÒÄy¤Î¥¼¸g¬FÄÒ±ÀÂË	0	0	871	0.4011	0	0	3	KMT	1	0.16088121	0.36862691	2.712769939	·s¥_¥«¤T­«°Ï«p¼w¨½
·s¥_¥«¤T­«°Ï«p¼w¨½	§d«Ø»«	·s¥_¥«¤T­«°Ï«p¼w¨½§d«Ø»«	2	1	1966	¥Á¥D¶i¨BÄÒ	0	1	391	0.1801	0	0	3	KMT	1	0.19331722	0.36862691	2.712769939	·s¥_¥«¤T­«°Ï«p¼w¨½
·s¥_¥«¤T­«°Ï«p¼w¨½	³¯ºa·£	·s¥_¥«¤T­«°Ï«p¼w¨½³¯ºa·£	3	1	1957	µLÄÒÄy¤Î¥¼¸g¬FÄÒ±ÀÂË	0	0	909	0.4187	1	0	3	KMT	1	0.36862691	0.36862691	2.712769939	·s¥_¥«¤T­«°Ï«p¼w¨½
·s¥_¥«¤T­«°Ïºû¼w¨½	³¹«H¶¯	·s¥_¥«¤T­«°Ïºû¼w¨½³¹«H¶¯	1	1	1952	µLÄÒÄy¤Î¥¼¸g¬FÄÒ±ÀÂË	0	0	479	0.2662	0	0	2	KMT	1	0.07086244	0.60917813	1.641555976	·s¥_¥«¤T­«°Ïºû¼w¨½
·s¥_¥«¤T­«°Ïºû¼w¨½	«À®¶ªÚ	·s¥_¥«¤T­«°Ïºû¼w¨½«À®¶ªÚ	2	1	1951	µLÄÒÄy¤Î¥¼¸g¬FÄÒ±ÀÂË	0	0	1320	0.7337	1	0	2	KMT	1	0.60917813	0.60917813	1.641555976	·s¥_¥«¤T­«°Ïºû¼w¨½
·s¥_¥«¤T­«°Ï©|¼w¨½	¼B¿ü¼y	·s¥_¥«¤T­«°Ï©|¼w¨½¼B¿ü¼y	1	1	1969	µLÄÒÄy¤Î¥¼¸g¬FÄÒ±ÀÂË	0	0	1062	0.5474	1	0	2	KMT	1	0.29964676	0.50440301	1.982541698	·s¥_¥«¤T­«°Ï©|¼w¨½
·s¥_¥«¤T­«°Ï©|¼w¨½	½±ÄR­ë	·s¥_¥«¤T­«°Ï©|¼w¨½½±ÄR­ë	2	0	1953	µLÄÒÄy¤Î¥¼¸g¬FÄÒ±ÀÂË	0	0	878	0.4525	0	0	2	KMT	1	0.50440301	0.50440301	1.982541698	·s¥_¥«¤T­«°Ï©|¼w¨½
·s¥_¥«¤T­«°Ï°ö¼w¨½	³¯¸U¥Í	·s¥_¥«¤T­«°Ï°ö¼w¨½³¯¸U¥Í	1	1	1951	µLÄÒÄy¤Î¥¼¸g¬FÄÒ±ÀÂË	0	0	1121	0.4867	0	0	2	KMT	1	0.23687689	0.50025113	1.998995984	·s¥_¥«¤T­«°Ï°ö¼w¨½
·s¥_¥«¤T­«°Ï°ö¼w¨½	ÁÂ¿·Áâ	·s¥_¥«¤T­«°Ï°ö¼w¨½ÁÂ¿·Áâ	2	0	1953	µLÄÒÄy¤Î¥¼¸g¬FÄÒ±ÀÂË	0	0	1182	0.5132	1	0	2	KMT	1	0.50025113	0.50025113	1.998995984	·s¥_¥«¤T­«°Ï°ö¼w¨½
·s¥_¥«¤T­«°Ï¥ß¼w¨½	©P©v½÷	·s¥_¥«¤T­«°Ï¥ß¼w¨½©P©v½÷	1	1	1971	µLÄÒÄy¤Î¥¼¸g¬FÄÒ±ÀÂË	0	0	755	0.3717	0	0	3	KMT	1	0.13816089	0.48805139	2.048964557	·s¥_¥«¤T­«°Ï¥ß¼w¨½
·s¥_¥«¤T­«°Ï¥ß¼w¨½	³¯ª÷«°	·s¥_¥«¤T­«°Ï¥ß¼w¨½³¯ª÷«°	2	1	1959	µLÄÒÄy¤Î¥¼¸g¬FÄÒ±ÀÂË	0	0	1199	0.5903	1	0	3	KMT	1	0.48661498	0.48805139	2.048964557	·s¥_¥«¤T­«°Ï¥ß¼w¨½
·s¥_¥«¤T­«°Ï¥ß¼w¨½	³¯¯Â«Ø	·s¥_¥«¤T­«°Ï¥ß¼w¨½³¯¯Â«Ø	3	1	1975	µLÄÒÄy¤Î¥¼¸g¬FÄÒ±ÀÂË	0	0	77	0.0379	0	0	3	KMT	1	0.48805139	0.48805139	2.048964557	·s¥_¥«¤T­«°Ï¥ß¼w¨½
·s¥_¥«¤T­«°Ï¥Ã¼w¨½	³¯«aÀM	·s¥_¥«¤T­«°Ï¥Ã¼w¨½³¯«aÀM	1	1	1963	µLÄÒÄy¤Î¥¼¸g¬FÄÒ±ÀÂË	0	0	1700	0.5685	1	0	2	KMT	1	0.32319225	0.50929821	1.963486186	·s¥_¥«¤T­«°Ï¥Ã¼w¨½
·s¥_¥«¤T­«°Ï¥Ã¼w¨½	¶À²±¨¦	·s¥_¥«¤T­«°Ï¥Ã¼w¨½¶À²±¨¦	2	1	1941	µLÄÒÄy¤Î¥¼¸g¬FÄÒ±ÀÂË	0	0	1290	0.4314	0	0	2	KMT	1	0.50929821	0.50929821	1.963486186	·s¥_¥«¤T­«°Ï¥Ã¼w¨½
·s¥_¥«¤T­«°Ï¥ÃÞk¨½	³¢¤~ºÖ	·s¥_¥«¤T­«°Ï¥ÃÞk¨½³¢¤~ºÖ	1	1	1944	µLÄÒÄy¤Î¥¼¸g¬FÄÒ±ÀÂË	0	0	879	0.549	1	0	2	KMT	1	0.301401	0.50471181	1.981328711	·s¥_¥«¤T­«°Ï¥ÃÞk¨½
·s¥_¥«¤T­«°Ï¥ÃÞk¨½	¤ý»·´P	·s¥_¥«¤T­«°Ï¥ÃÞk¨½¤ý»·´P	2	1	1955	¥Á¥D¶i¨BÄÒ	0	1	722	0.4509	0	0	2	KMT	1	0.50471181	0.50471181	1.981328711	·s¥_¥«¤T­«°Ï¥ÃÞk¨½
·s¥_¥«¤T­«°Ï¥Ãµo¨½	³¯?®R	·s¥_¥«¤T­«°Ï¥Ãµo¨½³¯?®R	1	0	1952	¥Á¥D¶i¨BÄÒ	0	1	2095	0.6127	1	0	2	KMT	1	0.37540129	0.52532513	1.903583025	·s¥_¥«¤T­«°Ï¥Ãµo¨½
·s¥_¥«¤T­«°Ï¥Ãµo¨½	¤ý¥Ã©M	·s¥_¥«¤T­«°Ï¥Ãµo¨½¤ý¥Ã©M	2	1	1949	µLÄÒÄy¤Î¥¼¸g¬FÄÒ±ÀÂË	0	0	1324	0.3872	0	0	2	KMT	1	0.52532513	0.52532513	1.903583025	·s¥_¥«¤T­«°Ï¥Ãµo¨½
·s¥_¥«¤T­«°Ï¥Ã²±¨½	¹ù¿üµo	·s¥_¥«¤T­«°Ï¥Ã²±¨½¹ù¿üµo	1	1	1970	µLÄÒÄy¤Î¥¼¸g¬FÄÒ±ÀÂË	0	0	1001	0.4835	0	0	2	KMT	1	0.23377225	0.50044121	1.998236716	·s¥_¥«¤T­«°Ï¥Ã²±¨½
·s¥_¥«¤T­«°Ï¥Ã²±¨½	·¨«T¾Ü	·s¥_¥«¤T­«°Ï¥Ã²±¨½·¨«T¾Ü	2	1	1950	µLÄÒÄy¤Î¥¼¸g¬FÄÒ±ÀÂË	0	0	1069	0.5164	1	0	2	KMT	1	0.50044121	0.50044121	1.998236716	·s¥_¥«¤T­«°Ï¥Ã²±¨½
·s¥_¥«¤T­«°Ï¥Ã¦N¨½	¬xªø²M	·s¥_¥«¤T­«°Ï¥Ã¦N¨½¬xªø²M	1	1	1953	µLÄÒÄy¤Î¥¼¸g¬FÄÒ±ÀÂË	0	0	1520	1	1	0	1	KMT	1	1	1	1	·s¥_¥«¤T­«°Ï¥Ã¦N¨½
·s¥_¥«¤T­«°Ï¥Ã¦w¨½	¹ù§d¨qµ^	·s¥_¥«¤T­«°Ï¥Ã¦w¨½¹ù§d¨qµ^	1	0	1950	µLÄÒÄy¤Î¥¼¸g¬FÄÒ±ÀÂË	0	0	1939	1	1	0	1	KMT	1	1	1	1	·s¥_¥«¤T­«°Ï¥Ã¦w¨½
·s¥_¥«¤T­«°Ï¥ÃÂ×¨½	¶À¥V­Z	·s¥_¥«¤T­«°Ï¥ÃÂ×¨½¶À¥V­Z	1	1	1952	µLÄÒÄy¤Î¥¼¸g¬FÄÒ±ÀÂË	0	0	2673	1	1	0	1	KMT	1	1	1	1	·s¥_¥«¤T­«°Ï¥ÃÂ×¨½
·s¥_¥«¤T­«°Ï¥ÃºÖ¨½	¿c¶i¯q	·s¥_¥«¤T­«°Ï¥ÃºÖ¨½¿c¶i¯q	1	1	1956	µLÄÒÄy¤Î¥¼¸g¬FÄÒ±ÀÂË	0	0	1417	0.4591	0	0	2	KMT	1	0.21077281	0.50323745	1.987133509	·s¥_¥«¤T­«°Ï¥ÃºÖ¨½
·s¥_¥«¤T­«°Ï¥ÃºÖ¨½	§f©y¿³	·s¥_¥«¤T­«°Ï¥ÃºÖ¨½§f©y¿³	2	1	1981	µLÄÒÄy¤Î¥¼¸g¬FÄÒ±ÀÂË	0	0	1669	0.5408	1	0	2	KMT	1	0.50323745	0.50323745	1.987133509	·s¥_¥«¤T­«°Ï¥ÃºÖ¨½
·s¥_¥«¤T­«°Ï¥Ã²M¨½	³¯§»©÷	·s¥_¥«¤T­«°Ï¥Ã²M¨½³¯§»©÷	1	1	1984	µLÄÒÄy¤Î¥¼¸g¬FÄÒ±ÀÂË	0	0	558	0.1609	0	0	4	KMT	1	0.02588881	0.2914757	3.430817732	·s¥_¥«¤T­«°Ï¥Ã²M¨½
·s¥_¥«¤T­«°Ï¥Ã²M¨½	Ä¬ÀAªÚ	·s¥_¥«¤T­«°Ï¥Ã²M¨½Ä¬ÀAªÚ	2	0	1953	¥Á¥D¶i¨BÄÒ	0	1	558	0.1609	0	0	4	KMT	1	0.05177762	0.2914757	3.430817732	·s¥_¥«¤T­«°Ï¥Ã²M¨½
·s¥_¥«¤T­«°Ï¥Ã²M¨½	¶À¯à»í	·s¥_¥«¤T­«°Ï¥Ã²M¨½¶À¯à»í	3	1	1957	µLÄÒÄy¤Î¥¼¸g¬FÄÒ±ÀÂË	0	0	932	0.2688	0	0	4	KMT	1	0.12403106	0.2914757	3.430817732	·s¥_¥«¤T­«°Ï¥Ã²M¨½
·s¥_¥«¤T­«°Ï¥Ã²M¨½	§d·çµo	·s¥_¥«¤T­«°Ï¥Ã²M¨½§d·çµo	4	1	1954	µLÄÒÄy¤Î¥¼¸g¬FÄÒ±ÀÂË	0	0	1419	0.4092	1	0	4	KMT	1	0.2914757	0.2914757	3.430817732	·s¥_¥«¤T­«°Ï¥Ã²M¨½
·s¥_¥«¤T­«°Ï¥Ã¶¶¨½	³\¹Å°}	·s¥_¥«¤T­«°Ï¥Ã¶¶¨½³\¹Å°}	1	1	1959	µLÄÒÄy¤Î¥¼¸g¬FÄÒ±ÀÂË	0	0	1842	0.5998	1	0	2	KMT	1	0.35976004	0.51984005	1.923668636	·s¥_¥«¤T­«°Ï¥Ã¶¶¨½
·s¥_¥«¤T­«°Ï¥Ã¶¶¨½	¤Bµb²»	·s¥_¥«¤T­«°Ï¥Ã¶¶¨½¤Bµb²»	2	1	1981	¥Á¥D¶i¨BÄÒ	0	1	1229	0.4001	0	0	2	KMT	1	0.51984005	0.51984005	1.923668636	·s¥_¥«¤T­«°Ï¥Ã¶¶¨½
·s¥_¥«¤T­«°Ï·Ë¬ü¨½	«\·¨¼z­s	·s¥_¥«¤T­«°Ï·Ë¬ü¨½«\·¨¼z­s	1	0	1935	µLÄÒÄy¤Î¥¼¸g¬FÄÒ±ÀÂË	0	0	446	0.0979	0	0	3	KMT	1	0.00958441	0.42060003	2.377555703	·s¥_¥«¤T­«°Ï·Ë¬ü¨½
·s¥_¥«¤T­«°Ï·Ë¬ü¨½	³¯Åv¦ì	·s¥_¥«¤T­«°Ï·Ë¬ü¨½³¯Åv¦ì	2	1	1963	µLÄÒÄy¤Î¥¼¸g¬FÄÒ±ÀÂË	0	0	2263	0.4969	1	0	3	KMT	1	0.25649402	0.42060003	2.377555703	·s¥_¥«¤T­«°Ï·Ë¬ü¨½
·s¥_¥«¤T­«°Ï·Ë¬ü¨½	´¿ÁcªQ	·s¥_¥«¤T­«°Ï·Ë¬ü¨½´¿ÁcªQ	3	1	1946	¥Á¥D¶i¨BÄÒ	0	1	1845	0.4051	0	0	3	KMT	1	0.42060003	0.42060003	2.377555703	·s¥_¥«¤T­«°Ï·Ë¬ü¨½
·s¥_¥«¤T­«°ÏºÖ¶©¨½	´¿¹ÅÙy	·s¥_¥«¤T­«°ÏºÖ¶©¨½´¿¹ÅÙy	1	1	1968	¥Á¥D¶i¨BÄÒ	0	1	587	0.2354	0	0	4	KMT	1	0.05541316	0.25413516	3.934914004	·s¥_¥«¤T­«°ÏºÖ¶©¨½
·s¥_¥«¤T­«°ÏºÖ¶©¨½	§õ¶i¯q	·s¥_¥«¤T­«°ÏºÖ¶©¨½§õ¶i¯q	2	1	1944	µLÄÒÄy¤Î¥¼¸g¬FÄÒ±ÀÂË	0	0	556	0.223	0	0	4	KMT	1	0.10514216	0.25413516	3.934914004	·s¥_¥«¤T­«°ÏºÖ¶©¨½
·s¥_¥«¤T­«°ÏºÖ¶©¨½	³¯¬KÄõ	·s¥_¥«¤T­«°ÏºÖ¶©¨½³¯¬KÄõ	3	0	1961	µLÄÒÄy¤Î¥¼¸g¬FÄÒ±ÀÂË	0	0	588	0.2358	0	0	4	KMT	1	0.1607438	0.25413516	3.934914004	·s¥_¥«¤T­«°ÏºÖ¶©¨½
·s¥_¥«¤T­«°ÏºÖ¶©¨½	ªL®ÛÄõ	·s¥_¥«¤T­«°ÏºÖ¶©¨½ªL®ÛÄõ	4	0	1959	µLÄÒÄy¤Î¥¼¸g¬FÄÒ±ÀÂË	0	0	762	0.3056	1	0	4	KMT	1	0.25413516	0.25413516	3.934914004	·s¥_¥«¤T­«°ÏºÖ¶©¨½
·s¥_¥«¤T­«°Ï¤­±`¨½	¤ý·çµØ	·s¥_¥«¤T­«°Ï¤­±`¨½¤ý·çµØ	1	1	1947	µLÄÒÄy¤Î¥¼¸g¬FÄÒ±ÀÂË	0	0	2098	1	1	0	1	KMT	1	1	1	1	·s¥_¥«¤T­«°Ï¤­±`¨½
·s¥_¥«¤T­«°Ï¤­ºÖ¨½	§õºÖ¤s	·s¥_¥«¤T­«°Ï¤­ºÖ¨½§õºÖ¤s	1	1	1963	µLÄÒÄy¤Î¥¼¸g¬FÄÒ±ÀÂË	0	0	595	0.2903	0	0	3	KMT	1	0.08427409	0.35244034	2.837359651	·s¥_¥«¤T­«°Ï¤­ºÖ¨½
·s¥_¥«¤T­«°Ï¤­ºÖ¨½	§õ°ê¤t	·s¥_¥«¤T­«°Ï¤­ºÖ¨½§õ°ê¤t	2	1	1943	µLÄÒÄy¤Î¥¼¸g¬FÄÒ±ÀÂË	0	0	913	0.4455	1	0	3	KMT	1	0.28274434	0.35244034	2.837359651	·s¥_¥«¤T­«°Ï¤­ºÖ¨½
·s¥_¥«¤T­«°Ï¤­ºÖ¨½	³¯²M°V	·s¥_¥«¤T­«°Ï¤­ºÖ¨½³¯²M°V	3	1	1954	µLÄÒÄy¤Î¥¼¸g¬FÄÒ±ÀÂË	0	0	541	0.264	0	0	3	KMT	1	0.35244034	0.35244034	2.837359651	·s¥_¥«¤T­«°Ï¤­ºÖ¨½
·s¥_¥«¤T­«°Ï¤¯©¾¨½	¶Àºt²K	·s¥_¥«¤T­«°Ï¤¯©¾¨½¶Àºt²K	1	1	1954	µLÄÒÄy¤Î¥¼¸g¬FÄÒ±ÀÂË	0	0	1602	1	1	0	1	KMT	1	1	1	1	·s¥_¥«¤T­«°Ï¤¯©¾¨½
·s¥_¥«¤T­«°Ï·OºÖ¨½	ªô­Z¬u	·s¥_¥«¤T­«°Ï·OºÖ¨½ªô­Z¬u	1	1	1966	µLÄÒÄy¤Î¥¼¸g¬FÄÒ±ÀÂË	0	0	1236	1	1	0	1	KMT	1	1	1	1	·s¥_¥«¤T­«°Ï·OºÖ¨½
·s¥_¥«¤T­«°Ï·O¥Í¨½	§d¤ô¤ì	·s¥_¥«¤T­«°Ï·O¥Í¨½§d¤ô¤ì	1	1	1957	µLÄÒÄy¤Î¥¼¸g¬FÄÒ±ÀÂË	0	0	881	0.5579	1	0	2	KMT	1	0.31125241	0.50661641	1.973880001	·s¥_¥«¤T­«°Ï·O¥Í¨½
·s¥_¥«¤T­«°Ï·O¥Í¨½	§dÃ£¯ø	·s¥_¥«¤T­«°Ï·O¥Í¨½§dÃ£¯ø	2	0	1979	µLÄÒÄy¤Î¥¼¸g¬FÄÒ±ÀÂË	0	0	698	0.442	0	0	2	KMT	1	0.50661641	0.50661641	1.973880001	·s¥_¥«¤T­«°Ï·O¥Í¨½
·s¥_¥«¤T­«°Ï·O´f¨½	½²²M¼w	·s¥_¥«¤T­«°Ï·O´f¨½½²²M¼w	1	1	1948	µLÄÒÄy¤Î¥¼¸g¬FÄÒ±ÀÂË	0	0	1338	1	1	0	1	KMT	1	1	1	1	·s¥_¥«¤T­«°Ï·O´f¨½
·s¥_¥«¤T­«°Ï·O·R¨½	ÁÂ²Mª÷	·s¥_¥«¤T­«°Ï·O·R¨½ÁÂ²Mª÷	1	1	1955	µLÄÒÄy¤Î¥¼¸g¬FÄÒ±ÀÂË	0	0	1396	0.5756	1	0	3	KMT	1	0.33131536	0.49726365	2.011005631	·s¥_¥«¤T­«°Ï·O·R¨½
·s¥_¥«¤T­«°Ï·O·R¨½	ªL°ê¼Ù	·s¥_¥«¤T­«°Ï·O·R¨½ªL°ê¼Ù	2	1	1951	µLÄÒÄy¤Î¥¼¸g¬FÄÒ±ÀÂË	0	0	987	0.407	0	0	3	KMT	1	0.49696436	0.49726365	2.011005631	·s¥_¥«¤T­«°Ï·O·R¨½
·s¥_¥«¤T­«°Ï·O·R¨½	³¯ªZ¤ý	·s¥_¥«¤T­«°Ï·O·R¨½³¯ªZ¤ý	3	1	1949	µLÄÒÄy¤Î¥¼¸g¬FÄÒ±ÀÂË	0	0	42	0.0173	0	0	3	KMT	1	0.49726365	0.49726365	2.011005631	·s¥_¥«¤T­«°Ï·O·R¨½
·s¥_¥«¤T­«°Ï·O¤Æ¨½	±i²M¬u	·s¥_¥«¤T­«°Ï·O¤Æ¨½±i²M¬u	1	1	1965	¤¤°ê°ê¥ÁÄÒ	1	0	1169	1	1	0	1	KMT	1	1	1	1	·s¥_¥«¤T­«°Ï·O¤Æ¨½
·s¥_¥«¤T­«°Ï·O¯§¨½	·¨²M¶¯	·s¥_¥«¤T­«°Ï·O¯§¨½·¨²M¶¯	1	1	1956	¥Á¥D¶i¨BÄÒ	0	1	1367	0.5033	1	0	2	KMT	1	0.25331089	0.49992245	2.000310248	·s¥_¥«¤T­«°Ï·O¯§¨½
·s¥_¥«¤T­«°Ï·O¯§¨½	¤ý±ÒÁo	·s¥_¥«¤T­«°Ï·O¯§¨½¤ý±ÒÁo	2	1	1971	¤¤°ê°ê¥ÁÄÒ	1	0	1349	0.4966	0	0	2	KMT	1	0.49992245	0.49992245	2.000310248	·s¥_¥«¤T­«°Ï·O¯§¨½
·s¥_¥«¤T­«°Ï´IµØ¨½	§f¤l¶©	·s¥_¥«¤T­«°Ï´IµØ¨½§f¤l¶©	1	1	1948	µLÄÒÄy¤Î¥¼¸g¬FÄÒ±ÀÂË	0	0	1620	1	1	0	1	KMT	1	1	1	1	·s¥_¥«¤T­«°Ï´IµØ¨½
·s¥_¥«¤T­«°Ï´I¶Q¨½	­J¤ÑÀs	·s¥_¥«¤T­«°Ï´I¶Q¨½­J¤ÑÀs	1	1	1965	µLÄÒÄy¤Î¥¼¸g¬FÄÒ±ÀÂË	0	0	1940	0.747	1	0	2	KMT	1	0.558009	0.62196741	1.607801283	·s¥_¥«¤T­«°Ï´I¶Q¨½
·s¥_¥«¤T­«°Ï´I¶Q¨½	¤ý®Ù·½	·s¥_¥«¤T­«°Ï´I¶Q¨½¤ý®Ù·½	2	1	1960	µLÄÒÄy¤Î¥¼¸g¬FÄÒ±ÀÂË	0	0	657	0.2529	0	0	2	KMT	1	0.62196741	0.62196741	1.607801283	·s¥_¥«¤T­«°Ï´I¶Q¨½
·s¥_¥«¤T­«°Ï´IºÖ¨½	³\¤g¼[	·s¥_¥«¤T­«°Ï´IºÖ¨½³\¤g¼[	1	1	1953	µLÄÒÄy¤Î¥¼¸g¬FÄÒ±ÀÂË	0	0	428	0.3151	0	0	2	KMT	1	0.09928801	0.56823905	1.759822737	·s¥_¥«¤T­«°Ï´IºÖ¨½
·s¥_¥«¤T­«°Ï´IºÖ¨½	³¯±©°ê	·s¥_¥«¤T­«°Ï´IºÖ¨½³¯±©°ê	2	1	1955	µLÄÒÄy¤Î¥¼¸g¬FÄÒ±ÀÂË	0	0	930	0.6848	1	0	2	KMT	1	0.56823905	0.56823905	1.759822737	·s¥_¥«¤T­«°Ï´IºÖ¨½
·s¥_¥«¤T­«°Ï¤­µØ¨½	¼BªZ«i	·s¥_¥«¤T­«°Ï¤­µØ¨½¼BªZ«i	1	1	1954	µLÄÒÄy¤Î¥¼¸g¬FÄÒ±ÀÂË	0	0	313	0.1142	0	0	4	KMT	1	0.01304164	0.30388668	3.290700336	·s¥_¥«¤T­«°Ï¤­µØ¨½
·s¥_¥«¤T­«°Ï¤­µØ¨½	ªLÄR¯u	·s¥_¥«¤T­«°Ï¤­µØ¨½ªLÄR¯u	2	0	1975	µLÄÒÄy¤Î¥¼¸g¬FÄÒ±ÀÂË	0	0	843	0.3076	0	0	4	KMT	1	0.1076594	0.30388668	3.290700336	·s¥_¥«¤T­«°Ï¤­µØ¨½
·s¥_¥«¤T­«°Ï¤­µØ¨½	±iÂE»Ê	·s¥_¥«¤T­«°Ï¤­µØ¨½±iÂE»Ê	3	1	1961	µLÄÒÄy¤Î¥¼¸g¬FÄÒ±ÀÂË	0	0	461	0.1682	0	0	4	KMT	1	0.13595064	0.30388668	3.290700336	·s¥_¥«¤T­«°Ï¤­µØ¨½
·s¥_¥«¤T­«°Ï¤­µØ¨½	³¯ªZ¶¯	·s¥_¥«¤T­«°Ï¤­µØ¨½³¯ªZ¶¯	4	1	1943	µLÄÒÄy¤Î¥¼¸g¬FÄÒ±ÀÂË	0	0	1123	0.4098	1	0	4	KMT	1	0.30388668	0.30388668	3.290700336	·s¥_¥«¤T­«°Ï¤­µØ¨½
·s¥_¥«¤T­«°ÏºÑµØ¨½	§õ°êµØ	·s¥_¥«¤T­«°ÏºÑµØ¨½§õ°êµØ	1	1	1965	µLÄÒÄy¤Î¥¼¸g¬FÄÒ±ÀÂË	0	0	2436	1	1	0	1	KMT	1	1	1	1	·s¥_¥«¤T­«°ÏºÑµØ¨½
·s¥_¥«¤T­«°ÏºÖ¼Ö¨½	Ä¬­×½å	·s¥_¥«¤T­«°ÏºÖ¼Ö¨½Ä¬­×½å	1	1	1975	µLÄÒÄy¤Î¥¼¸g¬FÄÒ±ÀÂË	0	0	565	0.2482	0	0	3	KMT	1	0.06160324	0.38158553	2.620644446	·s¥_¥«¤T­«°ÏºÖ¼Ö¨½
·s¥_¥«¤T­«°ÏºÖ¼Ö¨½	¼BÄË¤è	·s¥_¥«¤T­«°ÏºÖ¼Ö¨½¼BÄË¤è	2	1	1950	µLÄÒÄy¤Î¥¼¸g¬FÄÒ±ÀÂË	0	0	1167	0.5127	1	0	3	KMT	1	0.32446453	0.38158553	2.620644446	·s¥_¥«¤T­«°ÏºÖ¼Ö¨½
·s¥_¥«¤T­«°ÏºÖ¼Ö¨½	·¨¼yÀs	·s¥_¥«¤T­«°ÏºÖ¼Ö¨½·¨¼yÀs	3	1	1963	¥Á¥D¶i¨BÄÒ	0	1	544	0.239	0	0	3	KMT	1	0.38158553	0.38158553	2.620644446	·s¥_¥«¤T­«°ÏºÖ¼Ö¨½
·s¥_¥«¤T­«°Ï¤¯µØ¨½	§õ¶i¶§	·s¥_¥«¤T­«°Ï¤¯µØ¨½§õ¶i¶§	1	1	1956	¥Á¥D¶i¨BÄÒ	0	1	733	0.2794	0	0	2	KMT	1	0.07806436	0.59718461	1.674524064	·s¥_¥«¤T­«°Ï¤¯µØ¨½
·s¥_¥«¤T­«°Ï¤¯µØ¨½	¬x°êªL	·s¥_¥«¤T­«°Ï¤¯µØ¨½¬x°êªL	2	1	1956	µLÄÒÄy¤Î¥¼¸g¬FÄÒ±ÀÂË	0	0	1890	0.7205	1	0	2	KMT	1	0.59718461	0.59718461	1.674524064	·s¥_¥«¤T­«°Ï¤¯µØ¨½
·s¥_¥«¤T­«°Ï¤­¶¶¨½	¬x¹Å¤¯	·s¥_¥«¤T­«°Ï¤­¶¶¨½¬x¹Å¤¯	1	1	1961	µLÄÒÄy¤Î¥¼¸g¬FÄÒ±ÀÂË	0	0	1399	0.5682	1	0	2	KMT	1	0.32285124	0.50921613	1.963802678	·s¥_¥«¤T­«°Ï¤­¶¶¨½
·s¥_¥«¤T­«°Ï¤­¶¶¨½	¦¿¤å¶¯	·s¥_¥«¤T­«°Ï¤­¶¶¨½¦¿¤å¶¯	2	1	1955	µLÄÒÄy¤Î¥¼¸g¬FÄÒ±ÀÂË	0	0	1063	0.4317	0	0	2	KMT	1	0.50921613	0.50921613	1.963802678	·s¥_¥«¤T­«°Ï¤­¶¶¨½
·s¥_¥«ªO¾ô°Ï¯d«J¨½	¶À©Ó«G	·s¥_¥«ªO¾ô°Ï¯d«J¨½¶À©Ó«G	1	1	1954	µLÄÒÄy¤Î¥¼¸g¬FÄÒ±ÀÂË	0	0	855	1	1	0	1	KMT	1	1	1	1	·s¥_¥«ªO¾ô°Ï¯d«J¨½
·s¥_¥«ªO¾ô°Ï¬yªÚ¨½	³¯«Ø°]	·s¥_¥«ªO¾ô°Ï¬yªÚ¨½³¯«Ø°]	1	1	1951	¤¤°ê°ê¥ÁÄÒ	1	0	701	1	1	0	1	KMT	1	1	1	1	·s¥_¥«ªO¾ô°Ï¬yªÚ¨½
·s¥_¥«ªO¾ô°Ï¨ªªQ¨½	±i¤¯¸q	·s¥_¥«ªO¾ô°Ï¨ªªQ¨½±i¤¯¸q	1	1	1947	µLÄÒÄy¤Î¥¼¸g¬FÄÒ±ÀÂË	0	0	388	1	1	0	1	KMT	1	1	1	1	·s¥_¥«ªO¾ô°Ï¨ªªQ¨½
·s¥_¥«ªO¾ô°Ï¶À¥Û¨½	§dÁoºa	·s¥_¥«ªO¾ô°Ï¶À¥Û¨½§dÁoºa	1	1	1953	¤¤°ê°ê¥ÁÄÒ	1	0	634	1	1	0	1	KMT	1	1	1	1	·s¥_¥«ªO¾ô°Ï¶À¥Û¨½
·s¥_¥«ªO¾ô°ÏÑº¨q¨½	¤ý²KºÖ	·s¥_¥«ªO¾ô°ÏÑº¨q¨½¤ý²KºÖ	1	1	1958	µLÄÒÄy¤Î¥¼¸g¬FÄÒ±ÀÂË	0	0	962	1	1	0	1	KMT	1	1	1	1	·s¥_¥«ªO¾ô°ÏÑº¨q¨½
·s¥_¥«ªO¾ô°ÏÙõ¿³¨½	³¢­×¥­	·s¥_¥«ªO¾ô°ÏÙõ¿³¨½³¢­×¥­	1	1	1967	µLÄÒÄy¤Î¥¼¸g¬FÄÒ±ÀÂË	0	0	836	0.2616	0	0	3	KMT	1	0.06843456	0.3463957	2.886871864	·s¥_¥«ªO¾ô°ÏÙõ¿³¨½
·s¥_¥«ªO¾ô°ÏÙõ¿³¨½	ÁÂ´I¥þ	·s¥_¥«ªO¾ô°ÏÙõ¿³¨½ÁÂ´I¥þ	2	1	1951	µLÄÒÄy¤Î¥¼¸g¬FÄÒ±ÀÂË	0	0	1347	0.4215	1	0	3	KMT	1	0.24609681	0.3463957	2.886871864	·s¥_¥«ªO¾ô°ÏÙõ¿³¨½
·s¥_¥«ªO¾ô°ÏÙõ¿³¨½	¬x¶®¹a	·s¥_¥«ªO¾ô°ÏÙõ¿³¨½¬x¶®¹a	3	0	1976	¤¤°ê°ê¥ÁÄÒ	1	0	1012	0.3167	0	0	3	KMT	1	0.3463957	0.3463957	2.886871864	·s¥_¥«ªO¾ô°ÏÙõ¿³¨½
·s¥_¥«ªO¾ô°Ï·s¿³¨½	¼B«H¶¯	·s¥_¥«ªO¾ô°Ï·s¿³¨½¼B«H¶¯	1	1	1943	µLÄÒÄy¤Î¥¼¸g¬FÄÒ±ÀÂË	0	0	527	0.2812	0	0	3	KMT	1	0.07907344	0.35076989	2.850871835	·s¥_¥«ªO¾ô°Ï·s¿³¨½
·s¥_¥«ªO¾ô°Ï·s¿³¨½	¶À¾Ç¶i	·s¥_¥«ªO¾ô°Ï·s¿³¨½¶À¾Ç¶i	2	1	1950	µLÄÒÄy¤Î¥¼¸g¬FÄÒ±ÀÂË	0	0	520	0.2774	0	0	3	KMT	1	0.1560242	0.35076989	2.850871835	·s¥_¥«ªO¾ô°Ï·s¿³¨½
·s¥_¥«ªO¾ô°Ï·s¿³¨½	±i§ÓÂE	·s¥_¥«ªO¾ô°Ï·s¿³¨½±i§ÓÂE	3	1	1956	¤¤°ê°ê¥ÁÄÒ	1	0	827	0.4413	1	0	3	KMT	1	0.35076989	0.35076989	2.850871835	·s¥_¥«ªO¾ô°Ï·s¿³¨½
·s¥_¥«ªO¾ô°ÏªÀ«á¨½	¿àºa·ç	·s¥_¥«ªO¾ô°ÏªÀ«á¨½¿àºa·ç	1	1	1957	µLÄÒÄy¤Î¥¼¸g¬FÄÒ±ÀÂË	0	0	1107	0.3207	0	0	4	KMT	1	0.10284849	0.30909995	3.235199488	·s¥_¥«ªO¾ô°ÏªÀ«á¨½
·s¥_¥«ªO¾ô°ÏªÀ«á¨½	©Pà±Î®	·s¥_¥«ªO¾ô°ÏªÀ«á¨½©Pà±Î®	2	1	1962	µLÄÒÄy¤Î¥¼¸g¬FÄÒ±ÀÂË	0	0	331	0.0959	0	0	4	KMT	1	0.1120453	0.30909995	3.235199488	·s¥_¥«ªO¾ô°ÏªÀ«á¨½
·s¥_¥«ªO¾ô°ÏªÀ«á¨½	¸â°ê©÷	·s¥_¥«ªO¾ô°ÏªÀ«á¨½¸â°ê©÷	3	1	1954	µLÄÒÄy¤Î¥¼¸g¬FÄÒ±ÀÂË	0	0	1407	0.4077	1	0	4	KMT	1	0.27826459	0.30909995	3.235199488	·s¥_¥«ªO¾ô°ÏªÀ«á¨½
·s¥_¥«ªO¾ô°ÏªÀ«á¨½	Ä¬«a¿²	·s¥_¥«ªO¾ô°ÏªÀ«á¨½Ä¬«a¿²	4	0	1960	µLÄÒÄy¤Î¥¼¸g¬FÄÒ±ÀÂË	0	0	606	0.1756	0	0	4	KMT	1	0.30909995	0.30909995	3.235199488	·s¥_¥«ªO¾ô°ÏªÀ«á¨½
·s¥_¥«ªO¾ô°Ï­»ªÀ¨½	¿à¬îªe	·s¥_¥«ªO¾ô°Ï­»ªÀ¨½¿à¬îªe	1	1	1959	µLÄÒÄy¤Î¥¼¸g¬FÄÒ±ÀÂË	0	0	1213	0.4524	1	0	4	KMT	1	0.20466576	0.31447422	3.1799109	·s¥_¥«ªO¾ô°Ï­»ªÀ¨½
·s¥_¥«ªO¾ô°Ï­»ªÀ¨½	Â²§Ó¶¯	·s¥_¥«ªO¾ô°Ï­»ªÀ¨½Â²§Ó¶¯	2	1	1969	µLÄÒÄy¤Î¥¼¸g¬FÄÒ±ÀÂË	0	0	520	0.1939	0	0	4	KMT	1	0.24226297	0.31447422	3.1799109	·s¥_¥«ªO¾ô°Ï­»ªÀ¨½
·s¥_¥«ªO¾ô°Ï­»ªÀ¨½	ªL³Ó¶©	·s¥_¥«ªO¾ô°Ï­»ªÀ¨½ªL³Ó¶©	3	1	1959	µLÄÒÄy¤Î¥¼¸g¬FÄÒ±ÀÂË	0	0	661	0.2465	0	0	4	KMT	1	0.30302522	0.31447422	3.1799109	·s¥_¥«ªO¾ô°Ï­»ªÀ¨½
·s¥_¥«ªO¾ô°Ï­»ªÀ¨½	§õ¼w­Z	·s¥_¥«ªO¾ô°Ï­»ªÀ¨½§õ¼w­Z	4	1	1955	µLÄÒÄy¤Î¥¼¸g¬FÄÒ±ÀÂË	0	0	287	0.107	0	0	4	KMT	1	0.31447422	0.31447422	3.1799109	·s¥_¥«ªO¾ô°Ï­»ªÀ¨½
·s¥_¥«ªO¾ô°Ï­»¶®¨½	´å¬Ó®õ	·s¥_¥«ªO¾ô°Ï­»¶®¨½´å¬Ó®õ	1	1	1975	µLÄÒÄy¤Î¥¼¸g¬FÄÒ±ÀÂË	0	0	501	0.2859	0	0	3	KMT	1	0.08173881	0.33910083	2.948975383	·s¥_¥«ªO¾ô°Ï­»¶®¨½
·s¥_¥«ªO¾ô°Ï­»¶®¨½	¨L¤ôª÷	·s¥_¥«ªO¾ô°Ï­»¶®¨½¨L¤ôª÷	2	1	1951	¤¤°ê°ê¥ÁÄÒ	1	0	687	0.3921	1	0	3	KMT	1	0.23548122	0.33910083	2.948975383	·s¥_¥«ªO¾ô°Ï­»¶®¨½
·s¥_¥«ªO¾ô°Ï­»¶®¨½	ÁÂ²Q«º	·s¥_¥«ªO¾ô°Ï­»¶®¨½ÁÂ²Q«º	3	0	1951	µLÄÒÄy¤Î¥¼¸g¬FÄÒ±ÀÂË	0	0	564	0.3219	0	0	3	KMT	1	0.33910083	0.33910083	2.948975383	·s¥_¥«ªO¾ô°Ï­»¶®¨½
·s¥_¥«ªO¾ô°Ï¤¤¥¿¨½	ªL·×¯q	·s¥_¥«ªO¾ô°Ï¤¤¥¿¨½ªL·×¯q	1	1	1969	µLÄÒÄy¤Î¥¼¸g¬FÄÒ±ÀÂË	0	0	2445	1	1	0	1	KMT	1	1	1	1	·s¥_¥«ªO¾ô°Ï¤¤¥¿¨½
·s¥_¥«ªO¾ô°Ï¦Û±j¨½	±i³·À¦	·s¥_¥«ªO¾ô°Ï¦Û±j¨½±i³·À¦	1	0	1957	µLÄÒÄy¤Î¥¼¸g¬FÄÒ±ÀÂË	0	0	1282	0.3888	1	0	3	KMT	1	0.15116544	0.34064729	2.935587716	·s¥_¥«ªO¾ô°Ï¦Û±j¨½
·s¥_¥«ªO¾ô°Ï¦Û±j¨½	³\¨qªâ	·s¥_¥«ªO¾ô°Ï¦Û±j¨½³\¨qªâ	2	0	1956	¤¤°ê°ê¥ÁÄÒ	1	0	1130	0.3427	0	0	3	KMT	1	0.26860873	0.34064729	2.935587716	·s¥_¥«ªO¾ô°Ï¦Û±j¨½
·s¥_¥«ªO¾ô°Ï¦Û±j¨½	§dµ×µ×	·s¥_¥«ªO¾ô°Ï¦Û±j¨½§dµ×µ×	3	0	1953	µLÄÒÄy¤Î¥¼¸g¬FÄÒ±ÀÂË	0	0	885	0.2684	0	0	3	KMT	1	0.34064729	0.34064729	2.935587716	·s¥_¥«ªO¾ô°Ï¦Û±j¨½
·s¥_¥«ªO¾ô°Ï¦Û¥ß¨½	¿àª÷Às	·s¥_¥«ªO¾ô°Ï¦Û¥ß¨½¿àª÷Às	1	1	1957	µLÄÒÄy¤Î¥¼¸g¬FÄÒ±ÀÂË	0	0	1499	1	1	0	1	KMT	1	1	1	1	·s¥_¥«ªO¾ô°Ï¦Û¥ß¨½
·s¥_¥«ªO¾ô°Ï¥úµØ¨½	±i¹Å®þ	·s¥_¥«ªO¾ô°Ï¥úµØ¨½±i¹Å®þ	1	0	1963	µLÄÒÄy¤Î¥¼¸g¬FÄÒ±ÀÂË	0	0	1431	1	1	0	1	KMT	1	1	1	1	·s¥_¥«ªO¾ô°Ï¥úµØ¨½
·s¥_¥«ªO¾ô°Ï¥úºa¨½	­J¶i¤O	·s¥_¥«ªO¾ô°Ï¥úºa¨½­J¶i¤O	1	1	1952	¤¤°ê°ê¥ÁÄÒ	1	0	1109	0.6721	1	0	2	KMT	1	0.45171841	0.55917125	1.7883609	·s¥_¥«ªO¾ô°Ï¥úºa¨½
·s¥_¥«ªO¾ô°Ï¥úºa¨½	ªL¤ô¹Ø	·s¥_¥«ªO¾ô°Ï¥úºa¨½ªL¤ô¹Ø	2	1	1949	µLÄÒÄy¤Î¥¼¸g¬FÄÒ±ÀÂË	0	0	541	0.3278	0	0	2	KMT	1	0.55917125	0.55917125	1.7883609	·s¥_¥«ªO¾ô°Ï¥úºa¨½
·s¥_¥«ªO¾ô°Ï°ê¥ú¨½	³¯¯À¬Ã	·s¥_¥«ªO¾ô°Ï°ê¥ú¨½³¯¯À¬Ã	1	0	1965	¤¤°ê°ê¥ÁÄÒ	1	0	1230	0.5144	1	0	2	KMT	1	0.26460736	0.50031761	1.998730366	·s¥_¥«ªO¾ô°Ï°ê¥ú¨½
·s¥_¥«ªO¾ô°Ï°ê¥ú¨½	ªL¨ØµX	·s¥_¥«ªO¾ô°Ï°ê¥ú¨½ªL¨ØµX	2	0	1953	¤¤°ê°ê¥ÁÄÒ	1	0	1161	0.4855	0	0	2	KMT	1	0.50031761	0.50031761	1.998730366	·s¥_¥«ªO¾ô°Ï°ê¥ú¨½
·s¥_¥«ªO¾ô°Ï´ä§À¨½	¿à¦pºÑ	·s¥_¥«ªO¾ô°Ï´ä§À¨½¿à¦pºÑ	1	0	1950	¤¤°ê°ê¥ÁÄÒ	1	0	592	0.3408	0	0	2	KMT	1	0.11614464	0.55055745	1.816340874	·s¥_¥«ªO¾ô°Ï´ä§À¨½
·s¥_¥«ªO¾ô°Ï´ä§À¨½	¨H«H©v	·s¥_¥«ªO¾ô°Ï´ä§À¨½¨H«H©v	2	1	1957	µLÄÒÄy¤Î¥¼¸g¬FÄÒ±ÀÂË	0	0	1145	0.6591	1	0	2	KMT	1	0.55055745	0.55055745	1.816340874	·s¥_¥«ªO¾ô°Ï´ä§À¨½
·s¥_¥«ªO¾ô°Ï·s¥Í¨½	³¯¼y©v	·s¥_¥«ªO¾ô°Ï·s¥Í¨½³¯¼y©v	1	1	1953	µLÄÒÄy¤Î¥¼¸g¬FÄÒ±ÀÂË	0	0	1323	0.4688	0	0	2	KMT	1	0.21977344	0.50184065	1.992664405	·s¥_¥«ªO¾ô°Ï·s¥Í¨½
·s¥_¥«ªO¾ô°Ï·s¥Í¨½	¤ý«O§Q	·s¥_¥«ªO¾ô°Ï·s¥Í¨½¤ý«O§Q	2	1	1958	µLÄÒÄy¤Î¥¼¸g¬FÄÒ±ÀÂË	0	0	1499	0.5311	1	0	2	KMT	1	0.50184065	0.50184065	1.992664405	·s¥_¥«ªO¾ô°Ï·s¥Í¨½
·s¥_¥«ªO¾ô°Ïª÷µØ¨½	§õ³·±ö	·s¥_¥«ªO¾ô°Ïª÷µØ¨½§õ³·±ö	1	0	1953	¤¤°ê°ê¥ÁÄÒ	1	0	1212	0.4832	0	0	2	KMT	1	0.23348224	0.50046113	1.99815718	·s¥_¥«ªO¾ô°Ïª÷µØ¨½
·s¥_¥«ªO¾ô°Ïª÷µØ¨½	¬x©v³ü	·s¥_¥«ªO¾ô°Ïª÷µØ¨½¬x©v³ü	2	1	1948	µLÄÒÄy¤Î¥¼¸g¬FÄÒ±ÀÂË	0	0	1296	0.5167	1	0	2	KMT	1	0.50046113	0.50046113	1.99815718	·s¥_¥«ªO¾ô°Ïª÷µØ¨½
·s¥_¥«ªO¾ô°Ï´ä¼w¨½	¦¿³ù¼e	·s¥_¥«ªO¾ô°Ï´ä¼w¨½¦¿³ù¼e	1	1	1975	¥Á¥D¶i¨BÄÒ	0	1	1238	0.4307	0	0	2	KMT	1	0.18550249	0.50949113	1.962742708	·s¥_¥«ªO¾ô°Ï´ä¼w¨½
·s¥_¥«ªO¾ô°Ï´ä¼w¨½	¾G½÷¦N	·s¥_¥«ªO¾ô°Ï´ä¼w¨½¾G½÷¦N	2	1	1953	µLÄÒÄy¤Î¥¼¸g¬FÄÒ±ÀÂË	0	0	1636	0.5692	1	0	2	KMT	1	0.50949113	0.50949113	1.962742708	·s¥_¥«ªO¾ô°Ï´ä¼w¨½
·s¥_¥«ªO¾ô°Ï¥ÁÅv¨½	¶Àºa´Ü	·s¥_¥«ªO¾ô°Ï¥ÁÅv¨½¶Àºa´Ü	1	1	1964	µLÄÒÄy¤Î¥¼¸g¬FÄÒ±ÀÂË	0	0	1458	1	1	0	1	KMT	1	1	1	1	·s¥_¥«ªO¾ô°Ï¥ÁÅv¨½
·s¥_¥«ªO¾ô°Ï¥Á¦w¨½	¼B®a¼y	·s¥_¥«ªO¾ô°Ï¥Á¦w¨½¼B®a¼y	1	1	1956	µLÄÒÄy¤Î¥¼¸g¬FÄÒ±ÀÂË	0	0	398	0.2972	0	0	2	KMT	1	0.08832784	0.58211513	1.717873232	·s¥_¥«ªO¾ô°Ï¥Á¦w¨½
·s¥_¥«ªO¾ô°Ï¥Á¦w¨½	³¯¤å²`	·s¥_¥«ªO¾ô°Ï¥Á¦w¨½³¯¤å²`	2	1	1951	¤¤°ê°ê¥ÁÄÒ	1	0	941	0.7027	1	0	2	KMT	1	0.58211513	0.58211513	1.717873232	·s¥_¥«ªO¾ô°Ï¥Á¦w¨½
·s¥_¥«ªO¾ô°Ï«Ø°ê¨½	¹ù©ú«i	·s¥_¥«ªO¾ô°Ï«Ø°ê¨½¹ù©ú«i	1	1	1959	µLÄÒÄy¤Î¥¼¸g¬FÄÒ±ÀÂË	0	0	1194	0.5093	1	0	2	KMT	1	0.25938649	0.50007485	1.999700645	·s¥_¥«ªO¾ô°Ï«Ø°ê¨½
·s¥_¥«ªO¾ô°Ï«Ø°ê¨½	§õª÷«°	·s¥_¥«ªO¾ô°Ï«Ø°ê¨½§õª÷«°	2	1	1956	µLÄÒÄy¤Î¥¼¸g¬FÄÒ±ÀÂË	0	0	1150	0.4906	0	0	2	KMT	1	0.50007485	0.50007485	1.999700645	·s¥_¥«ªO¾ô°Ï«Ø°ê¨½
·s¥_¥«ªO¾ô°Ïº~¥Í¨½	¿½¤ô¤å	·s¥_¥«ªO¾ô°Ïº~¥Í¨½¿½¤ô¤å	1	1	1954	¤¤°ê°ê¥ÁÄÒ	1	0	1552	0.5538	1	0	2	KMT	1	0.30669444	0.50569965	1.977458359	·s¥_¥«ªO¾ô°Ïº~¥Í¨½
·s¥_¥«ªO¾ô°Ïº~¥Í¨½	±i¥É±ö	·s¥_¥«ªO¾ô°Ïº~¥Í¨½±i¥É±ö	2	0	1947	µLÄÒÄy¤Î¥¼¸g¬FÄÒ±ÀÂË	0	0	1250	0.4461	0	0	2	KMT	1	0.50569965	0.50569965	1.977458359	·s¥_¥«ªO¾ô°Ïº~¥Í¨½
·s¥_¥«ªO¾ô°Ï¤½À]¨½	³¯¶Àà£	·s¥_¥«ªO¾ô°Ï¤½À]¨½³¯¶Àà£	1	0	1955	µLÄÒÄy¤Î¥¼¸g¬FÄÒ±ÀÂË	0	0	1026	0.4472	0	0	2	KMT	1	0.19998784	0.50546513	1.978375838	·s¥_¥«ªO¾ô°Ï¤½À]¨½
·s¥_¥«ªO¾ô°Ï¤½À]¨½	ªL¦A¨Ó	·s¥_¥«ªO¾ô°Ï¤½À]¨½ªL¦A¨Ó	2	1	1953	µLÄÒÄy¤Î¥¼¸g¬FÄÒ±ÀÂË	0	0	1268	0.5527	1	0	2	KMT	1	0.50546513	0.50546513	1.978375838	·s¥_¥«ªO¾ô°Ï¤½À]¨½
·s¥_¥«ªO¾ô°Ï·s¥Á¨½	Ä¬©úµo	·s¥_¥«ªO¾ô°Ï·s¥Á¨½Ä¬©úµo	1	1	1954	µLÄÒÄy¤Î¥¼¸g¬FÄÒ±ÀÂË	0	0	1095	0.438	0	0	2	KMT	1	0.191844	0.507688	1.969713682	·s¥_¥«ªO¾ô°Ï·s¥Á¨½
·s¥_¥«ªO¾ô°Ï·s¥Á¨½	³¯§Ó·×	·s¥_¥«ªO¾ô°Ï·s¥Á¨½³¯§Ó·×	2	1	1961	µLÄÒÄy¤Î¥¼¸g¬FÄÒ±ÀÂË	0	0	1405	0.562	1	0	2	KMT	1	0.507688	0.507688	1.969713682	·s¥_¥«ªO¾ô°Ï·s¥Á¨½
·s¥_¥«ªO¾ô°Ï©¯ºÖ¨½	§d´Âµa	·s¥_¥«ªO¾ô°Ï©¯ºÖ¨½§d´Âµa	1	1	1959	µLÄÒÄy¤Î¥¼¸g¬FÄÒ±ÀÂË	0	0	1336	0.5608	1	0	2	KMT	1	0.31449664	0.50730545	1.971199008	·s¥_¥«ªO¾ô°Ï©¯ºÖ¨½
·s¥_¥«ªO¾ô°Ï©¯ºÖ¨½	§õªL¯À¯u	·s¥_¥«ªO¾ô°Ï©¯ºÖ¨½§õªL¯À¯u	2	0	1953	¤¤°ê°ê¥ÁÄÒ	1	0	1046	0.4391	0	0	2	KMT	1	0.50730545	0.50730545	1.971199008	·s¥_¥«ªO¾ô°Ï©¯ºÖ¨½
·s¥_¥«ªO¾ô°Ï¤å¼w¨½	¿àÀA½ç	·s¥_¥«ªO¾ô°Ï¤å¼w¨½¿àÀA½ç	1	1	1954	µLÄÒÄy¤Î¥¼¸g¬FÄÒ±ÀÂË	0	0	1645	1	1	0	1	KMT	1	1	1	1	·s¥_¥«ªO¾ô°Ï¤å¼w¨½
·s¥_¥«ªO¾ô°Ï©¾¸Û¨½	±i§Óºû	·s¥_¥«ªO¾ô°Ï©¾¸Û¨½±i§Óºû	1	1	1978	µLÄÒÄy¤Î¥¼¸g¬FÄÒ±ÀÂË	0	0	387	0.1565	0	0	3	KMT	1	0.02449225	0.40322355	2.480013878	·s¥_¥«ªO¾ô°Ï©¾¸Û¨½
·s¥_¥«ªO¾ô°Ï©¾¸Û¨½	³¯¥ÉÄõ	·s¥_¥«ªO¾ô°Ï©¾¸Û¨½³¯¥ÉÄõ	2	0	1954	¤¤°ê°ê¥ÁÄÒ	1	0	1308	0.5291	1	0	3	KMT	1	0.30443906	0.40322355	2.480013878	·s¥_¥«ªO¾ô°Ï©¾¸Û¨½
·s¥_¥«ªO¾ô°Ï©¾¸Û¨½	¥ôªø¦¿	·s¥_¥«ªO¾ô°Ï©¾¸Û¨½¥ôªø¦¿	3	1	1958	¤¤°ê°ê¥ÁÄÒ	1	0	777	0.3143	0	0	3	KMT	1	0.40322355	0.40322355	2.480013878	·s¥_¥«ªO¾ô°Ï©¾¸Û¨½
·s¥_¥«ªO¾ô°Ï¶§©ú¨½	§d¤å¸R	·s¥_¥«ªO¾ô°Ï¶§©ú¨½§d¤å¸R	1	1	1944	¤¤°ê°ê¥ÁÄÒ	1	0	1564	1	1	0	1	KMT	1	1	1	1	·s¥_¥«ªO¾ô°Ï¶§©ú¨½
·s¥_¥«ªO¾ô°Ï¦Ê¹Ø¨½	ªLµØ°¶	·s¥_¥«ªO¾ô°Ï¦Ê¹Ø¨½ªLµØ°¶	1	1	1978	µLÄÒÄy¤Î¥¼¸g¬FÄÒ±ÀÂË	0	0	1271	1	1	0	1	KMT	1	1	1	1	·s¥_¥«ªO¾ô°Ï¦Ê¹Ø¨½
·s¥_¥«ªO¾ô°Ï¤¶¹Ø¨½	§õ©ø®Ë	·s¥_¥«ªO¾ô°Ï¤¶¹Ø¨½§õ©ø®Ë	1	1	1968	¤¤°ê°ê¥ÁÄÒ	1	0	1075	0.5666	1	0	2	KMT	1	0.32103556	0.50878445	1.965468874	·s¥_¥«ªO¾ô°Ï¤¶¹Ø¨½
·s¥_¥«ªO¾ô°Ï¤¶¹Ø¨½	³¯§J±Ó	·s¥_¥«ªO¾ô°Ï¤¶¹Ø¨½³¯§J±Ó	2	1	1957	µLÄÒÄy¤Î¥¼¸g¬FÄÒ±ÀÂË	0	0	822	0.4333	0	0	2	KMT	1	0.50878445	0.50878445	1.965468874	·s¥_¥«ªO¾ô°Ï¤¶¹Ø¨½
·s¥_¥«ªO¾ô°Ï·s®H¨½	Â²¦³°]	·s¥_¥«ªO¾ô°Ï·s®H¨½Â²¦³°]	1	1	1935	¤¤°ê°ê¥ÁÄÒ	1	0	842	0.5822	1	0	2	KMT	1	0.33895684	0.51343013	1.947684683	·s¥_¥«ªO¾ô°Ï·s®H¨½
·s¥_¥«ªO¾ô°Ï·s®H¨½	§õªQ¬w	·s¥_¥«ªO¾ô°Ï·s®H¨½§õªQ¬w	2	1	1956	µLÄÒÄy¤Î¥¼¸g¬FÄÒ±ÀÂË	0	0	604	0.4177	0	0	2	KMT	1	0.51343013	0.51343013	1.947684683	·s¥_¥«ªO¾ô°Ï·s®H¨½
·s¥_¥«ªO¾ô°ÏµØ¦¿¨½	¶Àµo¹F	·s¥_¥«ªO¾ô°ÏµØ¦¿¨½¶Àµo¹F	1	1	1951	¤¤°ê°ê¥ÁÄÒ	1	0	2707	1	1	0	1	KMT	1	1	1	1	·s¥_¥«ªO¾ô°ÏµØ¦¿¨½
·s¥_¥«ªO¾ô°Ï¦¿»A¨½	³s§Ó¦¨	·s¥_¥«ªO¾ô°Ï¦¿»A¨½³s§Ó¦¨	1	1	1967	µLÄÒÄy¤Î¥¼¸g¬FÄÒ±ÀÂË	0	0	1205	0.4181	0	0	2	KMT	1	0.17480761	0.51329885	1.948182818	·s¥_¥«ªO¾ô°Ï¦¿»A¨½
·s¥_¥«ªO¾ô°Ï¦¿»A¨½	±çª÷Às	·s¥_¥«ªO¾ô°Ï¦¿»A¨½±çª÷Às	2	1	1959	¥Á¥D¶i¨BÄÒ	0	1	1677	0.5818	1	0	2	KMT	1	0.51329885	0.51329885	1.948182818	·s¥_¥«ªO¾ô°Ï¦¿»A¨½
·s¥_¥«ªO¾ô°Ï¯Â»A¨½	»u°·¹F	·s¥_¥«ªO¾ô°Ï¯Â»A¨½»u°·¹F	1	1	1952	¤¤°ê°ê¥ÁÄÒ	1	0	1670	0.5378	1	0	2	KMT	1	0.28922884	0.50276525	1.988999836	·s¥_¥«ªO¾ô°Ï¯Â»A¨½
·s¥_¥«ªO¾ô°Ï¯Â»A¨½	³¯«³¤¯	·s¥_¥«ªO¾ô°Ï¯Â»A¨½³¯«³¤¯	2	1	1960	µLÄÒÄy¤Î¥¼¸g¬FÄÒ±ÀÂË	0	0	1435	0.4621	0	0	2	KMT	1	0.50276525	0.50276525	1.988999836	·s¥_¥«ªO¾ô°Ï¯Â»A¨½
·s¥_¥«ªO¾ô°Ï·ËÀY¨½	³¢ªF³Ó	·s¥_¥«ªO¾ô°Ï·ËÀY¨½³¢ªF³Ó	1	1	1959	µLÄÒÄy¤Î¥¼¸g¬FÄÒ±ÀÂË	0	0	1659	0.4817	0	0	2	KMT	1	0.23203489	0.50056613	1.997738041	·s¥_¥«ªO¾ô°Ï·ËÀY¨½
·s¥_¥«ªO¾ô°Ï·ËÀY¨½	§E»È°ñ	·s¥_¥«ªO¾ô°Ï·ËÀY¨½§E»È°ñ	2	1	1965	µLÄÒÄy¤Î¥¼¸g¬FÄÒ±ÀÂË	0	0	1785	0.5182	1	0	2	KMT	1	0.50056613	0.50056613	1.997738041	·s¥_¥«ªO¾ô°Ï·ËÀY¨½
·s¥_¥«ªO¾ô°ÏÁp»A¨½	¶À¾Æ­¸	·s¥_¥«ªO¾ô°ÏÁp»A¨½¶À¾Æ­¸	1	1	1951	¤¤°ê°ê¥ÁÄÒ	1	0	1718	1	1	0	1	KMT	1	1	1	1	·s¥_¥«ªO¾ô°ÏÁp»A¨½
·s¥_¥«ªO¾ô°Ï¤å¤Æ¨½	³¯ªo²M	·s¥_¥«ªO¾ô°Ï¤å¤Æ¨½³¯ªo²M	1	1	1951	¤¤°ê°ê¥ÁÄÒ	1	0	956	0.4847	1	0	3	KMT	1	0.23493409	0.47033854	2.126128129	·s¥_¥«ªO¾ô°Ï¤å¤Æ¨½
·s¥_¥«ªO¾ô°Ï¤å¤Æ¨½	ÁÂ¤ë¤l	·s¥_¥«ªO¾ô°Ï¤å¤Æ¨½ÁÂ¤ë¤l	2	0	1942	¤¤°ê°ê¥ÁÄÒ	1	0	955	0.4842	0	0	3	KMT	1	0.46938373	0.47033854	2.126128129	·s¥_¥«ªO¾ô°Ï¤å¤Æ¨½
·s¥_¥«ªO¾ô°Ï¤å¤Æ¨½	ªL§d©xÄõ	·s¥_¥«ªO¾ô°Ï¤å¤Æ¨½ªL§d©xÄõ	3	0	1938	µLÄÒÄy¤Î¥¼¸g¬FÄÒ±ÀÂË	0	0	61	0.0309	0	0	3	KMT	1	0.47033854	0.47033854	2.126128129	·s¥_¥«ªO¾ô°Ï¤å¤Æ¨½
·s¥_¥«ªO¾ô°Ï§»»A¨½	¶À·¨¨¯©f	·s¥_¥«ªO¾ô°Ï§»»A¨½¶À·¨¨¯©f	1	0	1957	¤¤°ê°ê¥ÁÄÒ	1	0	2216	1	1	0	1	KMT	1	1	1	1	·s¥_¥«ªO¾ô°Ï§»»A¨½
·s¥_¥«ªO¾ô°Ï¤¯»A¨½	³¯ª÷¬u	·s¥_¥«ªO¾ô°Ï¤¯»A¨½³¯ª÷¬u	1	1	1963	µLÄÒÄy¤Î¥¼¸g¬FÄÒ±ÀÂË	0	0	1488	1	1	0	1	KMT	1	1	1	1	·s¥_¥«ªO¾ô°Ï¤¯»A¨½
·s¥_¥«ªO¾ô°Ï·s»A¨½	½²ªÂ	·s¥_¥«ªO¾ô°Ï·s»A¨½½²ªÂ	1	0	1972	µLÄÒÄy¤Î¥¼¸g¬FÄÒ±ÀÂË	0	0	1880	0.4091	0	0	2	KMT	1	0.16736281	0.51640745	1.936455409	·s¥_¥«ªO¾ô°Ï·s»A¨½
·s¥_¥«ªO¾ô°Ï·s»A¨½	³¯¤ô§ü	·s¥_¥«ªO¾ô°Ï·s»A¨½³¯¤ô§ü	2	1	1951	¤¤°ê°ê¥ÁÄÒ	1	0	2715	0.5908	1	0	2	KMT	1	0.51640745	0.51640745	1.936455409	·s¥_¥«ªO¾ô°Ï·s»A¨½
·s¥_¥«ªO¾ô°Ï´Â¶§¨½	³¯¤å¦¨	·s¥_¥«ªO¾ô°Ï´Â¶§¨½³¯¤å¦¨	1	1	1954	µLÄÒÄy¤Î¥¼¸g¬FÄÒ±ÀÂË	0	0	1818	1	1	0	1	KMT	1	1	1	1	·s¥_¥«ªO¾ô°Ï´Â¶§¨½
·s¥_¥«ªO¾ô°Ï¦N»A¨½	³¯²M¥É	·s¥_¥«ªO¾ô°Ï¦N»A¨½³¯²M¥É	1	1	1956	µLÄÒÄy¤Î¥¼¸g¬FÄÒ±ÀÂË	0	0	2083	1	1	0	1	KMT	1	1	1	1	·s¥_¥«ªO¾ô°Ï¦N»A¨½
·s¥_¥«ªO¾ô°Ï¼w»A¨½	±iÄ£¤¯	·s¥_¥«ªO¾ô°Ï¼w»A¨½±iÄ£¤¯	1	1	1966	µLÄÒÄy¤Î¥¼¸g¬FÄÒ±ÀÂË	0	0	2075	0.5193	1	0	2	KMT	1	0.26967249	0.50064885	1.997407964	·s¥_¥«ªO¾ô°Ï¼w»A¨½
·s¥_¥«ªO¾ô°Ï¼w»A¨½	³¯°ê©w	·s¥_¥«ªO¾ô°Ï¼w»A¨½³¯°ê©w	2	1	1940	µLÄÒÄy¤Î¥¼¸g¬FÄÒ±ÀÂË	0	0	1920	0.4806	0	0	2	KMT	1	0.50064885	0.50064885	1.997407964	·s¥_¥«ªO¾ô°Ï¼w»A¨½
·s¥_¥«ªO¾ô°Ï·s®ü¨½	½²¼yµo	·s¥_¥«ªO¾ô°Ï·s®ü¨½½²¼yµo	1	1	1956	µLÄÒÄy¤Î¥¼¸g¬FÄÒ±ÀÂË	0	0	1068	0.4607	1	0	3	KMT	1	0.21224449	0.4028895	2.482070146	·s¥_¥«ªO¾ô°Ï·s®ü¨½
·s¥_¥«ªO¾ô°Ï·s®ü¨½	¤ý³·­s	·s¥_¥«ªO¾ô°Ï·s®ü¨½¤ý³·­s	2	0	1969	µLÄÒÄy¤Î¥¼¸g¬FÄÒ±ÀÂË	0	0	276	0.119	0	0	3	KMT	1	0.22640549	0.4028895	2.482070146	·s¥_¥«ªO¾ô°Ï·s®ü¨½
·s¥_¥«ªO¾ô°Ï·s®ü¨½	³¯©xªF	·s¥_¥«ªO¾ô°Ï·s®ü¨½³¯©xªF	3	1	1963	µLÄÒÄy¤Î¥¼¸g¬FÄÒ±ÀÂË	0	0	974	0.4201	0	0	3	KMT	1	0.4028895	0.4028895	2.482070146	·s¥_¥«ªO¾ô°Ï·s®ü¨½
·s¥_¥«ªO¾ô°Ïº¡»A¨½	±iºÑ¥É	·s¥_¥«ªO¾ô°Ïº¡»A¨½±iºÑ¥É	1	0	1953	µLÄÒÄy¤Î¥¼¸g¬FÄÒ±ÀÂË	0	0	764	0.3829	0	0	3	KMT	1	0.14661241	0.41431634	2.413614679	·s¥_¥«ªO¾ô°Ïº¡»A¨½
·s¥_¥«ªO¾ô°Ïº¡»A¨½	ªL­«¥ú	·s¥_¥«ªO¾ô°Ïº¡»A¨½ªL­«¥ú	2	1	1955	µLÄÒÄy¤Î¥¼¸g¬FÄÒ±ÀÂË	0	0	1008	0.5052	1	0	3	KMT	1	0.40183945	0.41431634	2.413614679	·s¥_¥«ªO¾ô°Ïº¡»A¨½
·s¥_¥«ªO¾ô°Ïº¡»A¨½	±iºa¸q	·s¥_¥«ªO¾ô°Ïº¡»A¨½±iºa¸q	3	1	1950	µLÄÒÄy¤Î¥¼¸g¬FÄÒ±ÀÂË	0	0	223	0.1117	0	0	3	KMT	1	0.41431634	0.41431634	2.413614679	·s¥_¥«ªO¾ô°Ïº¡»A¨½
·s¥_¥«ªO¾ô°Ï©ú»A¨½	³\¤å§»	·s¥_¥«ªO¾ô°Ï©ú»A¨½³\¤å§»	1	1	1950	µLÄÒÄy¤Î¥¼¸g¬FÄÒ±ÀÂË	0	0	1461	0.4679	0	0	2	KMT	1	0.21893041	0.50195441	1.992212799	·s¥_¥«ªO¾ô°Ï©ú»A¨½
·s¥_¥«ªO¾ô°Ï©ú»A¨½	¨H¼wµo	·s¥_¥«ªO¾ô°Ï©ú»A¨½¨H¼wµo	2	1	1958	µLÄÒÄy¤Î¥¼¸g¬FÄÒ±ÀÂË	0	0	1661	0.532	1	0	2	KMT	1	0.50195441	0.50195441	1.992212799	·s¥_¥«ªO¾ô°Ï©ú»A¨½
·s¥_¥«ªO¾ô°ÏªQ»A¨½	ªLªü¸U	·s¥_¥«ªO¾ô°ÏªQ»A¨½ªLªü¸U	1	1	1952	µLÄÒÄy¤Î¥¼¸g¬FÄÒ±ÀÂË	0	0	1854	1	1	0	1	KMT	1	1	1	1	·s¥_¥«ªO¾ô°ÏªQ»A¨½
·s¥_¥«ªO¾ô°Ï¬f»A¨½	ªL³¯¨qµâ	·s¥_¥«ªO¾ô°Ï¬f»A¨½ªL³¯¨qµâ	1	0	1951	µLÄÒÄy¤Î¥¼¸g¬FÄÒ±ÀÂË	0	0	1481	0.6509	1	0	2	KMT	1	0.42367081	0.54547181	1.833275307	·s¥_¥«ªO¾ô°Ï¬f»A¨½
·s¥_¥«ªO¾ô°Ï¬f»A¨½	¤ý¥Ã·½	·s¥_¥«ªO¾ô°Ï¬f»A¨½¤ý¥Ã·½	2	1	1963	µLÄÒÄy¤Î¥¼¸g¬FÄÒ±ÀÂË	0	0	794	0.349	0	0	2	KMT	1	0.54547181	0.54547181	1.833275307	·s¥_¥«ªO¾ô°Ï¬f»A¨½
·s¥_¥«ªO¾ô°ÏÀs»A¨½	¹ù©[¬u	·s¥_¥«ªO¾ô°ÏÀs»A¨½¹ù©[¬u	1	1	1952	µLÄÒÄy¤Î¥¼¸g¬FÄÒ±ÀÂË	0	0	176	0.0559	0	0	3	KMT	1	0.00312481	0.46219442	2.163591676	·s¥_¥«ªO¾ô°ÏÀs»A¨½
·s¥_¥«ªO¾ô°ÏÀs»A¨½	±i®¶µo	·s¥_¥«ªO¾ô°ÏÀs»A¨½±i®¶µo	2	1	1959	µLÄÒÄy¤Î¥¼¸g¬FÄÒ±ÀÂË	0	0	1745	0.5544	1	0	3	KMT	1	0.31048417	0.46219442	2.163591676	·s¥_¥«ªO¾ô°ÏÀs»A¨½
·s¥_¥«ªO¾ô°ÏÀs»A¨½	ªL¥É¶Q	·s¥_¥«ªO¾ô°ÏÀs»A¨½ªL¥É¶Q	3	0	1953	µLÄÒÄy¤Î¥¼¸g¬FÄÒ±ÀÂË	0	0	1226	0.3895	0	0	3	KMT	1	0.46219442	0.46219442	2.163591676	·s¥_¥«ªO¾ô°ÏÀs»A¨½
·s¥_¥«ªO¾ô°ÏªQ¬f¨½	¤ý§»§Ó	·s¥_¥«ªO¾ô°ÏªQ¬f¨½¤ý§»§Ó	1	1	1965	µLÄÒÄy¤Î¥¼¸g¬FÄÒ±ÀÂË	0	0	1189	1	1	0	1	KMT	1	1	1	1	·s¥_¥«ªO¾ô°ÏªQ¬f¨½
·s¥_¥«ªO¾ô°ÏµØ»A¨½	ÁÂºÖ¤t	·s¥_¥«ªO¾ô°ÏµØ»A¨½ÁÂºÖ¤t	1	1	1956	µLÄÒÄy¤Î¥¼¸g¬FÄÒ±ÀÂË	0	0	1416	0.6501	1	0	2	KMT	1	0.42263001	0.54499005	1.834895885	·s¥_¥«ªO¾ô°ÏµØ»A¨½
·s¥_¥«ªO¾ô°ÏµØ»A¨½	®}ºa¼w	·s¥_¥«ªO¾ô°ÏµØ»A¨½®}ºa¼w	2	1	1961	µLÄÒÄy¤Î¥¼¸g¬FÄÒ±ÀÂË	0	0	762	0.3498	0	0	2	KMT	1	0.54499005	0.54499005	1.834895885	·s¥_¥«ªO¾ô°ÏµØ»A¨½
·s¥_¥«ªO¾ô°Ï²÷¥ú¨½	§d·ç°ó	·s¥_¥«ªO¾ô°Ï²÷¥ú¨½§d·ç°ó	1	1	1948	µLÄÒÄy¤Î¥¼¸g¬FÄÒ±ÀÂË	0	0	748	0.3991	0	0	2	KMT	1	0.15928081	0.52024145	1.922184401	·s¥_¥«ªO¾ô°Ï²÷¥ú¨½
·s¥_¥«ªO¾ô°Ï²÷¥ú¨½	À¹¦c¬W	·s¥_¥«ªO¾ô°Ï²÷¥ú¨½À¹¦c¬W	2	1	1956	µLÄÒÄy¤Î¥¼¸g¬FÄÒ±ÀÂË	0	0	1126	0.6008	1	0	2	KMT	1	0.52024145	0.52024145	1.922184401	·s¥_¥«ªO¾ô°Ï²÷¥ú¨½
·s¥_¥«ªO¾ô°Ï©¾»A¨½	ÃCÄR¤ë	·s¥_¥«ªO¾ô°Ï©¾»A¨½ÃCÄR¤ë	1	0	1947	µLÄÒÄy¤Î¥¼¸g¬FÄÒ±ÀÂË	0	0	1986	0.3632	0	0	2	KMT	1	0.13191424	0.53730113	1.861153726	·s¥_¥«ªO¾ô°Ï©¾»A¨½
·s¥_¥«ªO¾ô°Ï©¾»A¨½	³¯´ºµØ	·s¥_¥«ªO¾ô°Ï©¾»A¨½³¯´ºµØ	2	1	1953	µLÄÒÄy¤Î¥¼¸g¬FÄÒ±ÀÂË	0	0	3481	0.6367	1	0	2	KMT	1	0.53730113	0.53730113	1.861153726	·s¥_¥«ªO¾ô°Ï©¾»A¨½
·s¥_¥«ªO¾ô°Ï´P»A¨½	ªL«Ûºõ	·s¥_¥«ªO¾ô°Ï´P»A¨½ªL«Ûºõ	1	1	1958	¤¤°ê°ê¥ÁÄÒ	1	0	1317	1	1	0	1	KMT	1	1	1	1	·s¥_¥«ªO¾ô°Ï´P»A¨½
·s¥_¥«ªO¾ô°Ï¤å¸t¨½	¾G¯ÀÃ£	·s¥_¥«ªO¾ô°Ï¤å¸t¨½¾G¯ÀÃ£	1	0	1960	µLÄÒÄy¤Î¥¼¸g¬FÄÒ±ÀÂË	0	0	578	0.2493	0	0	2	KMT	1	0.06215049	0.62555085	1.598591066	·s¥_¥«ªO¾ô°Ï¤å¸t¨½
·s¥_¥«ªO¾ô°Ï¤å¸t¨½	·¨¤¯ºÀ	·s¥_¥«ªO¾ô°Ï¤å¸t¨½·¨¤¯ºÀ	2	1	1972	µLÄÒÄy¤Î¥¼¸g¬FÄÒ±ÀÂË	0	0	1740	0.7506	1	0	2	KMT	1	0.62555085	0.62555085	1.598591066	·s¥_¥«ªO¾ô°Ï¤å¸t¨½
·s¥_¥«ªO¾ô°Ï¤å»A¨½	½²ªLä¢	·s¥_¥«ªO¾ô°Ï¤å»A¨½½²ªLä¢	1	0	1932	µLÄÒÄy¤Î¥¼¸g¬FÄÒ±ÀÂË	0	0	1962	1	1	0	1	KMT	1	1	1	1	·s¥_¥«ªO¾ô°Ï¤å»A¨½
·s¥_¥«ªO¾ô°Ï«C»A¨½	ªL´Ë·Ó	·s¥_¥«ªO¾ô°Ï«C»A¨½ªL´Ë·Ó	1	1	1963	µLÄÒÄy¤Î¥¼¸g¬FÄÒ±ÀÂË	0	0	1584	1	1	0	1	KMT	1	1	1	1	·s¥_¥«ªO¾ô°Ï«C»A¨½
·s¥_¥«ªO¾ô°ÏÃh»A¨½	¬x¤å¤Æ	·s¥_¥«ªO¾ô°ÏÃh»A¨½¬x¤å¤Æ	1	1	1959	µLÄÒÄy¤Î¥¼¸g¬FÄÒ±ÀÂË	0	0	1979	0.5491	1	0	2	KMT	1	0.30151081	0.50473145	1.981251614	·s¥_¥«ªO¾ô°ÏÃh»A¨½
·s¥_¥«ªO¾ô°ÏÃh»A¨½	­J´Â½å	·s¥_¥«ªO¾ô°ÏÃh»A¨½­J´Â½å	2	1	1958	µLÄÒÄy¤Î¥¼¸g¬FÄÒ±ÀÂË	0	0	1625	0.4508	0	0	2	KMT	1	0.50473145	0.50473145	1.981251614	·s¥_¥«ªO¾ô°ÏÃh»A¨½
·s¥_¥«ªO¾ô°ÏºÖ»A¨½	³¯¹Å¥Í	·s¥_¥«ªO¾ô°ÏºÖ»A¨½³¯¹Å¥Í	1	1	1950	¤¤°ê°ê¥ÁÄÒ	1	0	847	1	1	0	1	KMT	1	1	1	1	·s¥_¥«ªO¾ô°ÏºÖ»A¨½
·s¥_¥«ªO¾ô°Ï´ä¼L¨½	³¯ª÷¦ö	·s¥_¥«ªO¾ô°Ï´ä¼L¨½³¯ª÷¦ö	1	1	1935	µLÄÒÄy¤Î¥¼¸g¬FÄÒ±ÀÂË	0	0	239	0.0649	0	0	3	KMT	1	0.00421201	0.44132762	2.265890361	·s¥_¥«ªO¾ô°Ï´ä¼L¨½
·s¥_¥«ªO¾ô°Ï´ä¼L¨½	ªL©v½å	·s¥_¥«ªO¾ô°Ï´ä¼L¨½ªL©v½å	2	1	1955	¥Á¥D¶i¨BÄÒ	0	1	1694	0.4605	0	0	3	KMT	1	0.21627226	0.44132762	2.265890361	·s¥_¥«ªO¾ô°Ï´ä¼L¨½
·s¥_¥«ªO¾ô°Ï´ä¼L¨½	³Å¦N«°	·s¥_¥«ªO¾ô°Ï´ä¼L¨½³Å¦N«°	3	1	1956	µLÄÒÄy¤Î¥¼¸g¬FÄÒ±ÀÂË	0	0	1745	0.4744	1	0	3	KMT	1	0.44132762	0.44132762	2.265890361	·s¥_¥«ªO¾ô°Ï´ä¼L¨½
·s¥_¥«ªO¾ô°Ï®¶¿³¨½	¶À²M¶¶	·s¥_¥«ªO¾ô°Ï®¶¿³¨½¶À²M¶¶	1	1	1959	¥Á¥D¶i¨BÄÒ	0	1	1410	0.5042	1	0	2	KMT	1	0.25421764	0.49993613	2.000255513	·s¥_¥«ªO¾ô°Ï®¶¿³¨½
·s¥_¥«ªO¾ô°Ï®¶¿³¨½	¶À·É®ü	·s¥_¥«ªO¾ô°Ï®¶¿³¨½¶À·É®ü	2	1	1955	µLÄÒÄy¤Î¥¼¸g¬FÄÒ±ÀÂË	0	0	1386	0.4957	0	0	2	KMT	1	0.49993613	0.49993613	2.000255513	·s¥_¥«ªO¾ô°Ï®¶¿³¨½
·s¥_¥«ªO¾ô°Ï®¶¸q¨½	ªL¾ð®Ú	·s¥_¥«ªO¾ô°Ï®¶¸q¨½ªL¾ð®Ú	1	1	1961	µLÄÒÄy¤Î¥¼¸g¬FÄÒ±ÀÂË	0	0	992	0.3695	0	0	2	KMT	1	0.13653025	0.53393441	1.872889219	·s¥_¥«ªO¾ô°Ï®¶¸q¨½
·s¥_¥«ªO¾ô°Ï®¶¸q¨½	ªô¤T¯q	·s¥_¥«ªO¾ô°Ï®¶¸q¨½ªô¤T¯q	2	1	1965	µLÄÒÄy¤Î¥¼¸g¬FÄÒ±ÀÂË	0	0	1692	0.6304	1	0	2	KMT	1	0.53393441	0.53393441	1.872889219	·s¥_¥«ªO¾ô°Ï®¶¸q¨½
·s¥_¥«ªO¾ô°Ï¥ú´_¨½	§d«Ø©M	·s¥_¥«ªO¾ô°Ï¥ú´_¨½§d«Ø©M	1	1	1971	µLÄÒÄy¤Î¥¼¸g¬FÄÒ±ÀÂË	0	0	1667	1	1	0	1	KMT	1	1	1	1	·s¥_¥«ªO¾ô°Ï¥ú´_¨½
·s¥_¥«ªO¾ô°Ï®HáY¨½	´¿¦P¿³	·s¥_¥«ªO¾ô°Ï®HáY¨½´¿¦P¿³	1	1	1952	µLÄÒÄy¤Î¥¼¸g¬FÄÒ±ÀÂË	0	0	2490	0.6727	1	0	2	KMT	1	0.45252529	0.55958513	1.787038194	·s¥_¥«ªO¾ô°Ï®HáY¨½
·s¥_¥«ªO¾ô°Ï®HáY¨½	½±©úÅ²	·s¥_¥«ªO¾ô°Ï®HáY¨½½±©úÅ²	2	1	1955	µLÄÒÄy¤Î¥¼¸g¬FÄÒ±ÀÂË	0	0	1211	0.3272	0	0	2	KMT	1	0.55958513	0.55958513	1.787038194	·s¥_¥«ªO¾ô°Ï®HáY¨½
·s¥_¥«ªO¾ô°Ï´I¶Q¨½	³\¸ê¸R	·s¥_¥«ªO¾ô°Ï´I¶Q¨½³\¸ê¸R	1	1	1950	µLÄÒÄy¤Î¥¼¸g¬FÄÒ±ÀÂË	0	0	210	0.144	0	0	4	KMT	1	0.020736	0.31533846	3.1711958	·s¥_¥«ªO¾ô°Ï´I¶Q¨½
·s¥_¥«ªO¾ô°Ï´I¶Q¨½	·¨´Ë¦N	·s¥_¥«ªO¾ô°Ï´I¶Q¨½·¨´Ë¦N	2	1	1941	µLÄÒÄy¤Î¥¼¸g¬FÄÒ±ÀÂË	0	0	562	0.3854	1	0	4	KMT	1	0.16926916	0.31533846	3.1711958	·s¥_¥«ªO¾ô°Ï´I¶Q¨½
·s¥_¥«ªO¾ô°Ï´I¶Q¨½	ÁÂ¦N¤¸	·s¥_¥«ªO¾ô°Ï´I¶Q¨½ÁÂ¦N¤¸	3	1	1955	µLÄÒÄy¤Î¥¼¸g¬FÄÒ±ÀÂË	0	0	149	0.1021	0	0	4	KMT	1	0.17969357	0.31533846	3.1711958	·s¥_¥«ªO¾ô°Ï´I¶Q¨½
·s¥_¥«ªO¾ô°Ï´I¶Q¨½	©P²Q®S	·s¥_¥«ªO¾ô°Ï´I¶Q¨½©P²Q®S	4	0	1958	µLÄÒÄy¤Î¥¼¸g¬FÄÒ±ÀÂË	0	0	537	0.3683	0	0	4	KMT	1	0.31533846	0.31533846	3.1711958	·s¥_¥«ªO¾ô°Ï´I¶Q¨½
·s¥_¥«ªO¾ô°Ïªø¹Ø¨½	³¯¨qµ^	·s¥_¥«ªO¾ô°Ïªø¹Ø¨½³¯¨qµ^	1	0	1957	µLÄÒÄy¤Î¥¼¸g¬FÄÒ±ÀÂË	0	0	555	0.3102	0	0	2	KMT	1	0.09622404	0.57191013	1.748526469	·s¥_¥«ªO¾ô°Ïªø¹Ø¨½
·s¥_¥«ªO¾ô°Ïªø¹Ø¨½	§õ«T¤¤	·s¥_¥«ªO¾ô°Ïªø¹Ø¨½§õ«T¤¤	2	1	1950	µLÄÒÄy¤Î¥¼¸g¬FÄÒ±ÀÂË	0	0	1234	0.6897	1	0	2	KMT	1	0.57191013	0.57191013	1.748526469	·s¥_¥«ªO¾ô°Ïªø¹Ø¨½
·s¥_¥«ªO¾ô°ÏºÖ¹Ø¨½	Ä¬ª¢¤s	·s¥_¥«ªO¾ô°ÏºÖ¹Ø¨½Ä¬ª¢¤s	1	1	1953	µLÄÒÄy¤Î¥¼¸g¬FÄÒ±ÀÂË	0	0	1527	1	1	0	1	KMT	1	1	1	1	·s¥_¥«ªO¾ô°ÏºÖ¹Ø¨½
·s¥_¥«ªO¾ô°Ï©~¤¯¨½	³¢·sªÚ	·s¥_¥«ªO¾ô°Ï©~¤¯¨½³¢·sªÚ	1	1	1957	µLÄÒÄy¤Î¥¼¸g¬FÄÒ±ÀÂË	0	0	1103	0.5501	1	0	2	KMT	1	0.30261001	0.50493005	1.980472345	·s¥_¥«ªO¾ô°Ï©~¤¯¨½
·s¥_¥«ªO¾ô°Ï©~¤¯¨½	¬_©ú½÷	·s¥_¥«ªO¾ô°Ï©~¤¯¨½¬_©ú½÷	2	1	1945	µLÄÒÄy¤Î¥¼¸g¬FÄÒ±ÀÂË	0	0	902	0.4498	0	0	2	KMT	1	0.50493005	0.50493005	1.980472345	·s¥_¥«ªO¾ô°Ï©~¤¯¨½
·s¥_¥«ªO¾ô°Ï®ü¤s¨½	¶À¬u®õ	·s¥_¥«ªO¾ô°Ï®ü¤s¨½¶À¬u®õ	1	1	1950	µLÄÒÄy¤Î¥¼¸g¬FÄÒ±ÀÂË	0	0	3636	1	1	0	1	KMT	1	1	1	1	·s¥_¥«ªO¾ô°Ï®ü¤s¨½
·s¥_¥«ªO¾ô°Ï¤E¦p¨½	±i°öªâ	·s¥_¥«ªO¾ô°Ï¤E¦p¨½±i°öªâ	1	0	1967	µLÄÒÄy¤Î¥¼¸g¬FÄÒ±ÀÂË	0	0	241	0.1321	0	0	4	KMT	1	0.01745041	0.28157377	3.55146717	·s¥_¥«ªO¾ô°Ï¤E¦p¨½
·s¥_¥«ªO¾ô°Ï¤E¦p¨½	Â²ª÷Às	·s¥_¥«ªO¾ô°Ï¤E¦p¨½Â²ª÷Às	2	1	1954	µLÄÒÄy¤Î¥¼¸g¬FÄÒ±ÀÂË	0	0	698	0.3828	1	0	4	KMT	1	0.16398625	0.28157377	3.55146717	·s¥_¥«ªO¾ô°Ï¤E¦p¨½
·s¥_¥«ªO¾ô°Ï¤E¦p¨½	±iºa§§	·s¥_¥«ªO¾ô°Ï¤E¦p¨½±iºa§§	3	1	1964	¥Á¥D¶i¨BÄÒ	0	1	453	0.2484	0	0	4	KMT	1	0.22568881	0.28157377	3.55146717	·s¥_¥«ªO¾ô°Ï¤E¦p¨½
·s¥_¥«ªO¾ô°Ï¤E¦p¨½	½±²M¥­	·s¥_¥«ªO¾ô°Ï¤E¦p¨½½±²M¥­	4	1	1952	µLÄÒÄy¤Î¥¼¸g¬FÄÒ±ÀÂË	0	0	431	0.2364	0	0	4	KMT	1	0.28157377	0.28157377	3.55146717	·s¥_¥«ªO¾ô°Ï¤E¦p¨½
·s¥_¥«ªO¾ô°Ï¥¿®õ¨½	¬xº~³ë	·s¥_¥«ªO¾ô°Ï¥¿®õ¨½¬xº~³ë	1	1	1947	µLÄÒÄy¤Î¥¼¸g¬FÄÒ±ÀÂË	0	0	815	0.3813	0	0	2	KMT	1	0.14538969	0.52805565	1.893739798	·s¥_¥«ªO¾ô°Ï¥¿®õ¨½
·s¥_¥«ªO¾ô°Ï¥¿®õ¨½	¶À¦N¶¯	·s¥_¥«ªO¾ô°Ï¥¿®õ¨½¶À¦N¶¯	2	1	1944	µLÄÒÄy¤Î¥¼¸g¬FÄÒ±ÀÂË	0	0	1322	0.6186	1	0	2	KMT	1	0.52805565	0.52805565	1.893739798	·s¥_¥«ªO¾ô°Ï¥¿®õ¨½
·s¥_¥«ªO¾ô°Ï¥É¥ú¨½	ªL¤ì¶¶	·s¥_¥«ªO¾ô°Ï¥É¥ú¨½ªL¤ì¶¶	1	1	1960	¥Á¥D¶i¨BÄÒ	0	1	1137	0.3623	0	0	4	KMT	1	0.13126129	0.31489086	3.17570348	·s¥_¥«ªO¾ô°Ï¥É¥ú¨½
·s¥_¥«ªO¾ô°Ï¥É¥ú¨½	´¿¯À­ë	·s¥_¥«ªO¾ô°Ï¥É¥ú¨½´¿¯À­ë	2	0	1957	µLÄÒÄy¤Î¥¼¸g¬FÄÒ±ÀÂË	0	0	334	0.1064	0	0	4	KMT	1	0.14258225	0.31489086	3.17570348	·s¥_¥«ªO¾ô°Ï¥É¥ú¨½
·s¥_¥«ªO¾ô°Ï¥É¥ú¨½	¶À¤å®ü	·s¥_¥«ªO¾ô°Ï¥É¥ú¨½¶À¤å®ü	3	1	1949	µLÄÒÄy¤Î¥¼¸g¬FÄÒ±ÀÂË	0	0	441	0.1405	0	0	4	KMT	1	0.1623225	0.31489086	3.17570348	·s¥_¥«ªO¾ô°Ï¥É¥ú¨½
·s¥_¥«ªO¾ô°Ï¥É¥ú¨½	´¿°êÑÐ	·s¥_¥«ªO¾ô°Ï¥É¥ú¨½´¿°êÑÐ	4	1	1964	µLÄÒÄy¤Î¥¼¸g¬FÄÒ±ÀÂË	0	0	1226	0.3906	1	0	4	KMT	1	0.31489086	0.31489086	3.17570348	·s¥_¥«ªO¾ô°Ï¥É¥ú¨½
·s¥_¥«ªO¾ô°Ï¥ú¤¯¨½	ÁÂ©÷¨Î	·s¥_¥«ªO¾ô°Ï¥ú¤¯¨½ÁÂ©÷¨Î	1	1	1953	µLÄÒÄy¤Î¥¼¸g¬FÄÒ±ÀÂË	0	0	1664	1	1	0	1	KMT	1	1	1	1	·s¥_¥«ªO¾ô°Ï¥ú¤¯¨½
·s¥_¥«ªO¾ô°Ï°ñáY¨½	³¯°®ºÕ	·s¥_¥«ªO¾ô°Ï°ñáY¨½³¯°®ºÕ	1	1	1951	¤¤°ê°ê¥ÁÄÒ	1	0	824	0.3313	0	0	2	KMT	1	0.10975969	0.55678565	1.796023299	·s¥_¥«ªO¾ô°Ï°ñáY¨½
·s¥_¥«ªO¾ô°Ï°ñáY¨½	Ä¬Úz¶Q	·s¥_¥«ªO¾ô°Ï°ñáY¨½Ä¬Úz¶Q	2	1	1953	µLÄÒÄy¤Î¥¼¸g¬FÄÒ±ÀÂË	0	0	1663	0.6686	1	0	2	KMT	1	0.55678565	0.55678565	1.796023299	·s¥_¥«ªO¾ô°Ï°ñáY¨½
·s¥_¥«ªO¾ô°Ï²ø·q¨½	ªôµY¶®	·s¥_¥«ªO¾ô°Ï²ø·q¨½ªôµY¶®	1	0	1956	µLÄÒÄy¤Î¥¼¸g¬FÄÒ±ÀÂË	0	0	763	0.3197	0	0	2	KMT	1	0.10220809	0.56488013	1.770287087	·s¥_¥«ªO¾ô°Ï²ø·q¨½
·s¥_¥«ªO¾ô°Ï²ø·q¨½	À¹²MªÚ	·s¥_¥«ªO¾ô°Ï²ø·q¨½À¹²MªÚ	2	1	1962	µLÄÒÄy¤Î¥¼¸g¬FÄÒ±ÀÂË	0	0	1623	0.6802	1	0	2	KMT	1	0.56488013	0.56488013	1.770287087	·s¥_¥«ªO¾ô°Ï²ø·q¨½
·s¥_¥«ªO¾ô°Ï¥Ã¦w¨½	¬x©ú¨Ó	·s¥_¥«ªO¾ô°Ï¥Ã¦w¨½¬x©ú¨Ó	1	1	1948	µLÄÒÄy¤Î¥¼¸g¬FÄÒ±ÀÂË	0	0	717	0.3518	0	0	2	KMT	1	0.12376324	0.54379685	1.838922017	·s¥_¥«ªO¾ô°Ï¥Ã¦w¨½
·s¥_¥«ªO¾ô°Ï¥Ã¦w¨½	¶À¼yÄQ	·s¥_¥«ªO¾ô°Ï¥Ã¦w¨½¶À¼yÄQ	2	1	1956	µLÄÒÄy¤Î¥¼¸g¬FÄÒ±ÀÂË	0	0	1321	0.6481	1	0	2	KMT	1	0.54379685	0.54379685	1.838922017	·s¥_¥«ªO¾ô°Ï¥Ã¦w¨½
·s¥_¥«ªO¾ô°ÏÂù¥É¨½	ÃC¥Û«°	·s¥_¥«ªO¾ô°ÏÂù¥É¨½ÃC¥Û«°	1	1	1953	¤¤°ê°ê¥ÁÄÒ	1	0	469	0.2081	0	0	2	KMT	1	0.04330561	0.67025285	1.49197426	·s¥_¥«ªO¾ô°ÏÂù¥É¨½
·s¥_¥«ªO¾ô°ÏÂù¥É¨½	¤ýÁo¾_	·s¥_¥«ªO¾ô°ÏÂù¥É¨½¤ýÁo¾_	2	1	1970	µLÄÒÄy¤Î¥¼¸g¬FÄÒ±ÀÂË	0	0	1784	0.7918	1	0	2	KMT	1	0.67025285	0.67025285	1.49197426	·s¥_¥«ªO¾ô°ÏÂù¥É¨½
·s¥_¥«ªO¾ô°Ï¼s·s¨½	¶À©ú©M	·s¥_¥«ªO¾ô°Ï¼s·s¨½¶À©ú©M	1	1	1967	µLÄÒÄy¤Î¥¼¸g¬FÄÒ±ÀÂË	0	0	1132	0.537	1	0	3	KMT	1	0.288369	0.41770445	2.394037219	·s¥_¥«ªO¾ô°Ï¼s·s¨½
·s¥_¥«ªO¾ô°Ï¼s·s¨½	±i¯à°ê	·s¥_¥«ªO¾ô°Ï¼s·s¨½±i¯à°ê	2	1	1947	¤¤°ê°ê¥ÁÄÒ	1	0	710	0.3368	0	0	3	KMT	1	0.40180324	0.41770445	2.394037219	·s¥_¥«ªO¾ô°Ï¼s·s¨½
·s¥_¥«ªO¾ô°Ï¼s·s¨½	·¨²MªL	·s¥_¥«ªO¾ô°Ï¼s·s¨½·¨²MªL	3	1	1952	µLÄÒÄy¤Î¥¼¸g¬FÄÒ±ÀÂË	0	0	266	0.1261	0	0	3	KMT	1	0.41770445	0.41770445	2.394037219	·s¥_¥«ªO¾ô°Ï¼s·s¨½
·s¥_¥«ªO¾ô°Ï²`¥C¨½	ªL¼WªQ	·s¥_¥«ªO¾ô°Ï²`¥C¨½ªL¼WªQ	1	1	1956	¤¤°ê°ê¥ÁÄÒ	1	0	2126	0.5179	1	0	2	KMT	1	0.26822041	0.50054441	1.997824728	·s¥_¥«ªO¾ô°Ï²`¥C¨½
·s¥_¥«ªO¾ô°Ï²`¥C¨½	³¯·G¸Û	·s¥_¥«ªO¾ô°Ï²`¥C¨½³¯·G¸Û	2	1	1957	µLÄÒÄy¤Î¥¼¸g¬FÄÒ±ÀÂË	0	0	1979	0.482	0	0	2	KMT	1	0.50054441	0.50054441	1.997824728	·s¥_¥«ªO¾ô°Ï²`¥C¨½
·s¥_¥«ªO¾ô°Ï­»¥C¨½	Ä¬²QªÚ	·s¥_¥«ªO¾ô°Ï­»¥C¨½Ä¬²QªÚ	1	0	1970	µLÄÒÄy¤Î¥¼¸g¬FÄÒ±ÀÂË	0	0	1258	0.531	1	0	2	KMT	1	0.281961	0.50182821	1.992713801	·s¥_¥«ªO¾ô°Ï­»¥C¨½
·s¥_¥«ªO¾ô°Ï­»¥C¨½	¬xª÷®ç	·s¥_¥«ªO¾ô°Ï­»¥C¨½¬xª÷®ç	2	0	1956	µLÄÒÄy¤Î¥¼¸g¬FÄÒ±ÀÂË	0	0	1111	0.4689	0	0	2	KMT	1	0.50182821	0.50182821	1.992713801	·s¥_¥«ªO¾ô°Ï­»¥C¨½
·s¥_¥«ªO¾ô°Ï¦è¦w¨½	¶À¤ô²±	·s¥_¥«ªO¾ô°Ï¦è¦w¨½¶À¤ô²±	1	1	1937	¤¤°ê°ê¥ÁÄÒ	1	0	1394	1	1	0	1	KMT	1	1	1	1	·s¥_¥«ªO¾ô°Ï¦è¦w¨½
·s¥_¥«ªO¾ô°ÏªF¥C¨½	¤B¤å²»	·s¥_¥«ªO¾ô°ÏªF¥C¨½¤B¤å²»	1	1	1952	µLÄÒÄy¤Î¥¼¸g¬FÄÒ±ÀÂË	0	0	2268	1	1	0	1	KMT	1	1	1	1	·s¥_¥«ªO¾ô°ÏªF¥C¨½
·s¥_¥«ªO¾ô°Ï¥Á¥Í¨½	³¯´º»ö	·s¥_¥«ªO¾ô°Ï¥Á¥Í¨½³¯´º»ö	1	1	1959	µLÄÒÄy¤Î¥¼¸g¬FÄÒ±ÀÂË	0	0	193	0.1498	0	0	4	KMT	1	0.02244004	0.3170575	3.154002034	·s¥_¥«ªO¾ô°Ï¥Á¥Í¨½
·s¥_¥«ªO¾ô°Ï¥Á¥Í¨½	¼B½ß§ø	·s¥_¥«ªO¾ô°Ï¥Á¥Í¨½¼B½ß§ø	2	1	1967	µLÄÒÄy¤Î¥¼¸g¬FÄÒ±ÀÂË	0	0	149	0.1156	0	0	4	KMT	1	0.0358034	0.3170575	3.154002034	·s¥_¥«ªO¾ô°Ï¥Á¥Í¨½
·s¥_¥«ªO¾ô°Ï¥Á¥Í¨½	¼ï¦°ª@	·s¥_¥«ªO¾ô°Ï¥Á¥Í¨½¼ï¦°ª@	3	1	1962	µLÄÒÄy¤Î¥¼¸g¬FÄÒ±ÀÂË	0	0	375	0.2911	0	0	4	KMT	1	0.12054261	0.3170575	3.154002034	·s¥_¥«ªO¾ô°Ï¥Á¥Í¨½
·s¥_¥«ªO¾ô°Ï¥Á¥Í¨½	¦¿©ú¨k	·s¥_¥«ªO¾ô°Ï¥Á¥Í¨½¦¿©ú¨k	4	1	1944	µLÄÒÄy¤Î¥¼¸g¬FÄÒ±ÀÂË	0	0	571	0.4433	1	0	4	KMT	1	0.3170575	0.3170575	3.154002034	·s¥_¥«ªO¾ô°Ï¥Á¥Í¨½
·s¥_¥«ªO¾ô°Ïªø¦w¨½	³¯Áo¤å	·s¥_¥«ªO¾ô°Ïªø¦w¨½³¯Áo¤å	1	1	1958	µLÄÒÄy¤Î¥¼¸g¬FÄÒ±ÀÂË	0	0	2319	1	1	0	1	KMT	1	1	1	1	·s¥_¥«ªO¾ô°Ïªø¦w¨½
·s¥_¥«ªO¾ô°ÏªF¦w¨½	³\¦A¦¨	·s¥_¥«ªO¾ô°ÏªF¦w¨½³\¦A¦¨	1	1	1961	µLÄÒÄy¤Î¥¼¸g¬FÄÒ±ÀÂË	0	0	789	0.5096	1	0	3	KMT	1	0.25969216	0.4483642	2.230329719	·s¥_¥«ªO¾ô°ÏªF¦w¨½
·s¥_¥«ªO¾ô°ÏªF¦w¨½	³¯ÁoÄË	·s¥_¥«ªO¾ô°ÏªF¦w¨½³¯ÁoÄË	2	1	1961	µLÄÒÄy¤Î¥¼¸g¬FÄÒ±ÀÂË	0	0	666	0.4302	0	0	3	KMT	1	0.4447642	0.4483642	2.230329719	·s¥_¥«ªO¾ô°ÏªF¦w¨½
·s¥_¥«ªO¾ô°ÏªF¦w¨½	ªL¨q§Ö	·s¥_¥«ªO¾ô°ÏªF¦w¨½ªL¨q§Ö	3	0	1955	µLÄÒÄy¤Î¥¼¸g¬FÄÒ±ÀÂË	0	0	93	0.06	0	0	3	KMT	1	0.4483642	0.4483642	2.230329719	·s¥_¥«ªO¾ô°ÏªF¦w¨½
·s¥_¥«ªO¾ô°ÏºÖ¥C¨½	ÁÂ®}ª÷½¬	·s¥_¥«ªO¾ô°ÏºÖ¥C¨½ÁÂ®}ª÷½¬	1	0	1953	¤¤°ê°ê¥ÁÄÒ	1	0	1643	1	1	0	1	KMT	1	1	1	1	·s¥_¥«ªO¾ô°ÏºÖ¥C¨½
·s¥_¥«ªO¾ô°ÏºÖ¸S¨½	©Pºa¥Ð	·s¥_¥«ªO¾ô°ÏºÖ¸S¨½©Pºa¥Ð	1	1	1942	µLÄÒÄy¤Î¥¼¸g¬FÄÒ±ÀÂË	0	0	756	0.3272	0	0	2	KMT	1	0.10705984	0.55958513	1.787038194	·s¥_¥«ªO¾ô°ÏºÖ¸S¨½
·s¥_¥«ªO¾ô°ÏºÖ¸S¨½	§f¬KÄõ	·s¥_¥«ªO¾ô°ÏºÖ¸S¨½§f¬KÄõ	2	0	1960	¤¤°ê°ê¥ÁÄÒ	1	0	1554	0.6727	1	0	2	KMT	1	0.55958513	0.55958513	1.787038194	·s¥_¥«ªO¾ô°ÏºÖ¸S¨½
·s¥_¥«ªO¾ô°Ï¥Á±Ú¨½	µ£°·¤@	·s¥_¥«ªO¾ô°Ï¥Á±Ú¨½µ£°·¤@	1	1	1940	µLÄÒÄy¤Î¥¼¸g¬FÄÒ±ÀÂË	0	0	2042	1	1	0	1	KMT	1	1	1	1	·s¥_¥«ªO¾ô°Ï¥Á±Ú¨½
·s¥_¥«ªO¾ô°Ï°ê®õ¨½	§E³¢¼e	·s¥_¥«ªO¾ô°Ï°ê®õ¨½§E³¢¼e	1	1	1947	µLÄÒÄy¤Î¥¼¸g¬FÄÒ±ÀÂË	0	0	1000	0.4761	0	0	2	KMT	1	0.22667121	0.50103765	1.995857996	·s¥_¥«ªO¾ô°Ï°ê®õ¨½
·s¥_¥«ªO¾ô°Ï°ê®õ¨½	³¯©v­×	·s¥_¥«ªO¾ô°Ï°ê®õ¨½³¯©v­×	2	1	1941	µLÄÒÄy¤Î¥¼¸g¬FÄÒ±ÀÂË	0	0	1100	0.5238	1	0	2	KMT	1	0.50103765	0.50103765	1.995857996	·s¥_¥«ªO¾ô°Ï°ê®õ¨½
·s¥_¥«ªO¾ô°Ï«á®H¨½	ÂÅ¶Q¬K	·s¥_¥«ªO¾ô°Ï«á®H¨½ÂÅ¶Q¬K	1	0	1950	¤¤°ê°ê¥ÁÄÒ	1	0	631	0.2702	0	0	4	KMT	1	0.07300804	0.30822474	3.244385898	·s¥_¥«ªO¾ô°Ï«á®H¨½
·s¥_¥«ªO¾ô°Ï«á®H¨½	ªL¸q¹Ø	·s¥_¥«ªO¾ô°Ï«á®H¨½ªL¸q¹Ø	2	1	1950	µLÄÒÄy¤Î¥¼¸g¬FÄÒ±ÀÂË	0	0	973	0.4167	1	0	4	KMT	1	0.24664693	0.30822474	3.244385898	·s¥_¥«ªO¾ô°Ï«á®H¨½
·s¥_¥«ªO¾ô°Ï«á®H¨½	ªLªô¦n	·s¥_¥«ªO¾ô°Ï«á®H¨½ªLªô¦n	3	0	1944	¥Á¥D¶i¨BÄÒ	0	1	180	0.077	0	0	4	KMT	1	0.25257593	0.30822474	3.244385898	·s¥_¥«ªO¾ô°Ï«á®H¨½
·s¥_¥«ªO¾ô°Ï«á®H¨½	ªLªüµo	·s¥_¥«ªO¾ô°Ï«á®H¨½ªLªüµo	4	1	1940	µLÄÒÄy¤Î¥¼¸g¬FÄÒ±ÀÂË	0	0	551	0.2359	0	0	4	KMT	1	0.30822474	0.30822474	3.244385898	·s¥_¥«ªO¾ô°Ï«á®H¨½
·s¥_¥«ªO¾ô°ÏºÖ¼w¨½	¼B§f¬üªK	·s¥_¥«ªO¾ô°ÏºÖ¼w¨½¼B§f¬üªK	1	0	1942	µLÄÒÄy¤Î¥¼¸g¬FÄÒ±ÀÂË	0	0	1827	0.6015	1	0	2	KMT	1	0.36180225	0.52052481	1.921138015	·s¥_¥«ªO¾ô°ÏºÖ¼w¨½
·s¥_¥«ªO¾ô°ÏºÖ¼w¨½	§õ­^¤T	·s¥_¥«ªO¾ô°ÏºÖ¼w¨½§õ­^¤T	2	1	1954	µLÄÒÄy¤Î¥¼¸g¬FÄÒ±ÀÂË	0	0	1210	0.3984	0	0	2	KMT	1	0.52052481	0.52052481	1.921138015	·s¥_¥«ªO¾ô°ÏºÖ¼w¨½
·s¥_¥«ªO¾ô°Ï´º¬P¨½	§õÄR­ë	·s¥_¥«ªO¾ô°Ï´º¬P¨½§õÄR­ë	1	0	1958	µLÄÒÄy¤Î¥¼¸g¬FÄÒ±ÀÂË	0	0	674	0.3295	0	0	3	KMT	1	0.10857025	0.3443367	2.904134238	·s¥_¥«ªO¾ô°Ï´º¬P¨½
·s¥_¥«ªO¾ô°Ï´º¬P¨½	ªL§Ó¦¨	·s¥_¥«ªO¾ô°Ï´º¬P¨½ªL§Ó¦¨	2	1	1956	µLÄÒÄy¤Î¥¼¸g¬FÄÒ±ÀÂË	0	0	838	0.4097	1	0	3	KMT	1	0.27642434	0.3443367	2.904134238	·s¥_¥«ªO¾ô°Ï´º¬P¨½
·s¥_¥«ªO¾ô°Ï´º¬P¨½	ªL§Ó¸Û	·s¥_¥«ªO¾ô°Ï´º¬P¨½ªL§Ó¸Û	3	1	1953	µLÄÒÄy¤Î¥¼¸g¬FÄÒ±ÀÂË	0	0	533	0.2606	0	0	3	KMT	1	0.3443367	0.3443367	2.904134238	·s¥_¥«ªO¾ô°Ï´º¬P¨½
·s¥_¥«ªO¾ô°ÏºÖ¬P¨½	Ã¹·ç¬Ã	·s¥_¥«ªO¾ô°ÏºÖ¬P¨½Ã¹·ç¬Ã	1	1	1949	¤¤°ê°ê¥ÁÄÒ	1	0	1067	0.5337	1	0	2	KMT	1	0.28483569	0.50217813	1.991325269	·s¥_¥«ªO¾ô°ÏºÖ¬P¨½
·s¥_¥«ªO¾ô°ÏºÖ¬P¨½	¶ÀÅãºa	·s¥_¥«ªO¾ô°ÏºÖ¬P¨½¶ÀÅãºa	2	1	1955	¥Á¥D¶i¨BÄÒ	0	1	932	0.4662	0	0	2	KMT	1	0.50217813	0.50217813	1.991325269	·s¥_¥«ªO¾ô°ÏºÖ¬P¨½
·s¥_¥«ªO¾ô°Ï¶m¶³¨½	´¿¤åÂ@	·s¥_¥«ªO¾ô°Ï¶m¶³¨½´¿¤åÂ@	1	1	1984	¤¤°ê°ê¥ÁÄÒ	1	0	804	0.3725	0	0	2	KMT	1	0.13875625	0.53238701	1.878332832	·s¥_¥«ªO¾ô°Ï¶m¶³¨½
·s¥_¥«ªO¾ô°Ï¶m¶³¨½	ÁÂ¨q®Z	·s¥_¥«ªO¾ô°Ï¶m¶³¨½ÁÂ¨q®Z	2	0	1954	µLÄÒÄy¤Î¥¼¸g¬FÄÒ±ÀÂË	0	0	1354	0.6274	1	0	2	KMT	1	0.53238701	0.53238701	1.878332832	·s¥_¥«ªO¾ô°Ï¶m¶³¨½
·s¥_¥«ªO¾ô°Ï¼s¼w¨½	§f©ú«T	·s¥_¥«ªO¾ô°Ï¼s¼w¨½§f©ú«T	1	1	1974	µLÄÒÄy¤Î¥¼¸g¬FÄÒ±ÀÂË	0	0	1430	0.3784	0	0	2	KMT	1	0.14318656	0.52944881	1.888756724	·s¥_¥«ªO¾ô°Ï¼s¼w¨½
·s¥_¥«ªO¾ô°Ï¼s¼w¨½	©P«Ø©M	·s¥_¥«ªO¾ô°Ï¼s¼w¨½©P«Ø©M	2	1	1953	¤¤°ê°ê¥ÁÄÒ	1	0	2349	0.6215	1	0	2	KMT	1	0.52944881	0.52944881	1.888756724	·s¥_¥«ªO¾ô°Ï¼s¼w¨½
·s¥_¥«ªO¾ô°Ï¤jÂ×¨½	±iÀA°ó	·s¥_¥«ªO¾ô°Ï¤jÂ×¨½±iÀA°ó	1	1	1960	µLÄÒÄy¤Î¥¼¸g¬FÄÒ±ÀÂË	0	0	2612	1	1	0	1	KMT	1	1	1	1	·s¥_¥«ªO¾ô°Ï¤jÂ×¨½
·s¥_¥«ªO¾ô°Ï­«¼y¨½	ªL«H­×	·s¥_¥«ªO¾ô°Ï­«¼y¨½ªL«H­×	1	1	1957	µLÄÒÄy¤Î¥¼¸g¬FÄÒ±ÀÂË	0	0	3287	0.6738	1	0	2	KMT	1	0.45400644	0.56034765	1.784606396	·s¥_¥«ªO¾ô°Ï­«¼y¨½
·s¥_¥«ªO¾ô°Ï­«¼y¨½	Ã¹¤åÔÐ	·s¥_¥«ªO¾ô°Ï­«¼y¨½Ã¹¤åÔÐ	2	0	1986	µLÄÒÄy¤Î¥¼¸g¬FÄÒ±ÀÂË	0	0	1591	0.3261	0	0	2	KMT	1	0.56034765	0.56034765	1.784606396	·s¥_¥«ªO¾ô°Ï­«¼y¨½
·s¥_¥«ªO¾ô°Ï¤¯·R¨½	¸­¤¤¥¿	·s¥_¥«ªO¾ô°Ï¤¯·R¨½¸­¤¤¥¿	1	1	1961	¤¤°ê°ê¥ÁÄÒ	1	0	1244	0.6176	1	0	2	KMT	1	0.38142976	0.52758305	1.895436178	·s¥_¥«ªO¾ô°Ï¤¯·R¨½
·s¥_¥«ªO¾ô°Ï¤¯·R¨½	¨ô¬îµâ	·s¥_¥«ªO¾ô°Ï¤¯·R¨½¨ô¬îµâ	2	0	1964	µLÄÒÄy¤Î¥¼¸g¬FÄÒ±ÀÂË	0	0	770	0.3823	0	0	2	KMT	1	0.52758305	0.52758305	1.895436178	·s¥_¥«ªO¾ô°Ï¤¯·R¨½
·s¥_¥«ªO¾ô°Ï©M¥­¨½	¶À³¯¤Á	·s¥_¥«ªO¾ô°Ï©M¥­¨½¶À³¯¤Á	1	0	1955	µLÄÒÄy¤Î¥¼¸g¬FÄÒ±ÀÂË	0	0	533	0.3031	0	0	2	KMT	1	0.09186961	0.57739985	1.731902078	·s¥_¥«ªO¾ô°Ï©M¥­¨½
·s¥_¥«ªO¾ô°Ï©M¥­¨½	§õ½²¬Kªá	·s¥_¥«ªO¾ô°Ï©M¥­¨½§õ½²¬Kªá	2	0	1949	µLÄÒÄy¤Î¥¼¸g¬FÄÒ±ÀÂË	0	0	1225	0.6968	1	0	2	KMT	1	0.57739985	0.57739985	1.731902078	·s¥_¥«ªO¾ô°Ï©M¥­¨½
·s¥_¥«ªO¾ô°Ï¼sºÖ¨½	³¯ªQªK	·s¥_¥«ªO¾ô°Ï¼sºÖ¨½³¯ªQªK	1	1	1948	¥Á¥D¶i¨BÄÒ	0	1	1410	0.6149	1	0	2	KMT	1	0.37810201	0.52632701	1.899959495	·s¥_¥«ªO¾ô°Ï¼sºÖ¨½
·s¥_¥«ªO¾ô°Ï¼sºÖ¨½	¼B¬ü­s	·s¥_¥«ªO¾ô°Ï¼sºÖ¨½¼B¬ü­s	2	0	1958	µLÄÒÄy¤Î¥¼¸g¬FÄÒ±ÀÂË	0	0	883	0.385	0	0	2	KMT	1	0.52632701	0.52632701	1.899959495	·s¥_¥«ªO¾ô°Ï¼sºÖ¨½
·s¥_¥«ªO¾ô°Ï¤­Åv¨½	§Eª÷«°	·s¥_¥«ªO¾ô°Ï¤­Åv¨½§Eª÷«°	1	1	1954	µLÄÒÄy¤Î¥¼¸g¬FÄÒ±ÀÂË	0	0	2057	1	1	0	1	KMT	1	1	1	1	·s¥_¥«ªO¾ô°Ï¤­Åv¨½
·s¥_¥«ªO¾ô°ÏµØ¿³¨½	¼B±iÄRµØ	·s¥_¥«ªO¾ô°ÏµØ¿³¨½¼B±iÄRµØ	1	0	1947	¤¤°ê°ê¥ÁÄÒ	1	0	1717	1	1	0	1	KMT	1	1	1	1	·s¥_¥«ªO¾ô°ÏµØ¿³¨½
·s¥_¥«ªO¾ô°ÏµØ¶Q¨½	ªLºa±m	·s¥_¥«ªO¾ô°ÏµØ¶Q¨½ªLºa±m	1	1	1953	µLÄÒÄy¤Î¥¼¸g¬FÄÒ±ÀÂË	0	0	1592	1	1	0	1	KMT	1	1	1	1	·s¥_¥«ªO¾ô°ÏµØ¶Q¨½
·s¥_¥«ªO¾ô°ÏµØºÖ¨½	¾G¬±©[	·s¥_¥«ªO¾ô°ÏµØºÖ¨½¾G¬±©[	1	1	1953	¤¤°ê°ê¥ÁÄÒ	1	0	532	0.3886	0	0	2	KMT	1	0.15100996	0.52469765	1.905859498	·s¥_¥«ªO¾ô°ÏµØºÖ¨½
·s¥_¥«ªO¾ô°ÏµØºÖ¨½	ªLª÷©ú	·s¥_¥«ªO¾ô°ÏµØºÖ¨½ªLª÷©ú	2	1	1955	µLÄÒÄy¤Î¥¼¸g¬FÄÒ±ÀÂË	0	0	837	0.6113	1	0	2	KMT	1	0.52469765	0.52469765	1.905859498	·s¥_¥«ªO¾ô°ÏµØºÖ¨½
·s¥_¥«ªO¾ô°ÏµØ¼w¨½	³¯­õ¤¯	·s¥_¥«ªO¾ô°ÏµØ¼w¨½³¯­õ¤¯	1	1	1960	µLÄÒÄy¤Î¥¼¸g¬FÄÒ±ÀÂË	0	0	1508	0.3905	0	0	2	KMT	1	0.15249025	0.52385861	1.908912025	·s¥_¥«ªO¾ô°ÏµØ¼w¨½
·s¥_¥«ªO¾ô°ÏµØ¼w¨½	³¯Ä_»Í	·s¥_¥«ªO¾ô°ÏµØ¼w¨½³¯Ä_»Í	2	1	1954	µLÄÒÄy¤Î¥¼¸g¬FÄÒ±ÀÂË	0	0	2353	0.6094	1	0	2	KMT	1	0.52385861	0.52385861	1.908912025	·s¥_¥«ªO¾ô°ÏµØ¼w¨½
·s¥_¥«ªO¾ô°ÏµØªF¨½	¾HÀ¹¬K	·s¥_¥«ªO¾ô°ÏµØªF¨½¾HÀ¹¬K	1	0	1944	¤¤°ê°ê¥ÁÄÒ	1	0	3124	1	1	0	1	KMT	1	1	1	1	·s¥_¥«ªO¾ô°ÏµØªF¨½
·s¥_¥«ªO¾ô°Ï«H¸q¨½	ªL´I½m	·s¥_¥«ªO¾ô°Ï«H¸q¨½ªL´I½m	1	1	1957	µLÄÒÄy¤Î¥¼¸g¬FÄÒ±ÀÂË	0	0	1283	0.5115	1	0	2	KMT	1	0.26163225	0.50016681	1.999332983	·s¥_¥«ªO¾ô°Ï«H¸q¨½
·s¥_¥«ªO¾ô°Ï«H¸q¨½	¹ù¼z¾¤	·s¥_¥«ªO¾ô°Ï«H¸q¨½¹ù¼z¾¤	2	0	1950	µLÄÒÄy¤Î¥¼¸g¬FÄÒ±ÀÂË	0	0	1225	0.4884	0	0	2	KMT	1	0.50016681	0.50016681	1.999332983	·s¥_¥«ªO¾ô°Ï«H¸q¨½
·s¥_¥«ªO¾ô°Ï¯B¬w¨½	Ä¬ªôºÑ³s	·s¥_¥«ªO¾ô°Ï¯B¬w¨½Ä¬ªôºÑ³s	1	0	1939	µLÄÒÄy¤Î¥¼¸g¬FÄÒ±ÀÂË	0	0	1154	0.5076	1	0	2	KMT	1	0.25765776	0.50001705	1.999931802	·s¥_¥«ªO¾ô°Ï¯B¬w¨½
·s¥_¥«ªO¾ô°Ï¯B¬w¨½	´¿¤Ó¦N	·s¥_¥«ªO¾ô°Ï¯B¬w¨½´¿¤Ó¦N	2	1	1944	µLÄÒÄy¤Î¥¼¸g¬FÄÒ±ÀÂË	0	0	1119	0.4923	0	0	2	KMT	1	0.50001705	0.50001705	1.999931802	·s¥_¥«ªO¾ô°Ï¯B¬w¨½
·s¥_¥«ªO¾ô°ÏµØ¤¤¨½	´¿±R­õ	·s¥_¥«ªO¾ô°ÏµØ¤¤¨½´¿±R­õ	1	1	1967	µLÄÒÄy¤Î¥¼¸g¬FÄÒ±ÀÂË	0	0	374	0.1118	0	0	4	KMT	1	0.01249924	0.32220786	3.10358661	·s¥_¥«ªO¾ô°ÏµØ¤¤¨½
·s¥_¥«ªO¾ô°ÏµØ¤¤¨½	³¯¦w¥¿	·s¥_¥«ªO¾ô°ÏµØ¤¤¨½³¯¦w¥¿	2	1	1957	¤¤°ê°ê¥ÁÄÒ	1	0	406	0.1214	0	0	4	KMT	1	0.0272372	0.32220786	3.10358661	·s¥_¥«ªO¾ô°ÏµØ¤¤¨½
·s¥_¥«ªO¾ô°ÏµØ¤¤¨½	¶Àºa·×	·s¥_¥«ªO¾ô°ÏµØ¤¤¨½¶Àºa·×	3	1	1968	¥Á¥D¶i¨BÄÒ	0	1	1202	0.3595	0	0	4	KMT	1	0.15647745	0.32220786	3.10358661	·s¥_¥«ªO¾ô°ÏµØ¤¤¨½
·s¥_¥«ªO¾ô°ÏµØ¤¤¨½	½²¤ì®Æ	·s¥_¥«ªO¾ô°ÏµØ¤¤¨½½²¤ì®Æ	4	1	1959	µLÄÒÄy¤Î¥¼¸g¬FÄÒ±ÀÂË	0	0	1361	0.4071	1	0	4	KMT	1	0.32220786	0.32220786	3.10358661	·s¥_¥«ªO¾ô°ÏµØ¤¤¨½
·s¥_¥«ªO¾ô°Ï¹´¤¤¨½	¶ÀªQ²±	·s¥_¥«ªO¾ô°Ï¹´¤¤¨½¶ÀªQ²±	1	1	1943	µLÄÒÄy¤Î¥¼¸g¬FÄÒ±ÀÂË	0	0	1379	0.5649	1	0	2	KMT	1	0.31911201	0.50833701	1.967198886	·s¥_¥«ªO¾ô°Ï¹´¤¤¨½
·s¥_¥«ªO¾ô°Ï¹´¤¤¨½	¶À´¼¯à	·s¥_¥«ªO¾ô°Ï¹´¤¤¨½¶À´¼¯à	2	1	1962	µLÄÒÄy¤Î¥¼¸g¬FÄÒ±ÀÂË	0	0	1062	0.435	0	0	2	KMT	1	0.50833701	0.50833701	1.967198886	·s¥_¥«ªO¾ô°Ï¹´¤¤¨½
·s¥_¥«ªO¾ô°Ï¤jÆ[¨½	§dÁoÄ³	·s¥_¥«ªO¾ô°Ï¤jÆ[¨½§dÁoÄ³	1	1	1955	¥Á¥D¶i¨BÄÒ	0	1	984	0.4312	1	0	3	KMT	1	0.18593344	0.38172989	2.619653389	·s¥_¥«ªO¾ô°Ï¤jÆ[¨½
·s¥_¥«ªO¾ô°Ï¤jÆ[¨½	¤B¯À¬K	·s¥_¥«ªO¾ô°Ï¤jÆ[¨½¤B¯À¬K	2	0	1959	µLÄÒÄy¤Î¥¼¸g¬FÄÒ±ÀÂË	0	0	351	0.1538	0	0	3	KMT	1	0.20958788	0.38172989	2.619653389	·s¥_¥«ªO¾ô°Ï¤jÆ[¨½
·s¥_¥«ªO¾ô°Ï¤jÆ[¨½	¦ó©ú¤s	·s¥_¥«ªO¾ô°Ï¤jÆ[¨½¦ó©ú¤s	3	1	1958	µLÄÒÄy¤Î¥¼¸g¬FÄÒ±ÀÂË	0	0	947	0.4149	0	0	3	KMT	1	0.38172989	0.38172989	2.619653389	·s¥_¥«ªO¾ô°Ï¤jÆ[¨½
·s¥_¥«ªO¾ô°ÏÅw¶é¨½	¤ý°êÀs	·s¥_¥«ªO¾ô°ÏÅw¶é¨½¤ý°êÀs	1	1	1951	µLÄÒÄy¤Î¥¼¸g¬FÄÒ±ÀÂË	0	0	778	1	1	0	1	KMT	1	1	1	1	·s¥_¥«ªO¾ô°ÏÅw¶é¨½
·s¥_¥«ªO¾ô°Ï¤¤¤s¨½	¤ý¶i©ô	·s¥_¥«ªO¾ô°Ï¤¤¤s¨½¤ý¶i©ô	1	1	1955	¤¤°ê°ê¥ÁÄÒ	1	0	942	0.4173	0	0	2	KMT	1	0.17413929	0.51356205	1.947184376	·s¥_¥«ªO¾ô°Ï¤¤¤s¨½
·s¥_¥«ªO¾ô°Ï¤¤¤s¨½	ªL²n	·s¥_¥«ªO¾ô°Ï¤¤¤s¨½ªL²n	2	1	1950	¤¤°ê°ê¥ÁÄÒ	1	0	1315	0.5826	1	0	2	KMT	1	0.51356205	0.51356205	1.947184376	·s¥_¥«ªO¾ô°Ï¤¤¤s¨½
·s¥_¥«ªO¾ô°Ï´_¿³¨½	³¢©v½÷	·s¥_¥«ªO¾ô°Ï´_¿³¨½³¢©v½÷	1	1	1961	µLÄÒÄy¤Î¥¼¸g¬FÄÒ±ÀÂË	0	0	767	1	1	0	1	KMT	1	1	1	1	·s¥_¥«ªO¾ô°Ï´_¿³¨½
·s¥_¥«ªO¾ô°Ï¤j¦w¨½	³¯¤åºa	·s¥_¥«ªO¾ô°Ï¤j¦w¨½³¯¤åºa	1	1	1961	µLÄÒÄy¤Î¥¼¸g¬FÄÒ±ÀÂË	0	0	1243	0.4832	0	0	2	KMT	1	0.23348224	0.50046113	1.99815718	·s¥_¥«ªO¾ô°Ï¤j¦w¨½
·s¥_¥«ªO¾ô°Ï¤j¦w¨½	³¯·qÀ·	·s¥_¥«ªO¾ô°Ï¤j¦w¨½³¯·qÀ·	2	1	1961	µLÄÒÄy¤Î¥¼¸g¬FÄÒ±ÀÂË	0	0	1329	0.5167	1	0	2	KMT	1	0.50046113	0.50046113	1.99815718	·s¥_¥«ªO¾ô°Ï¤j¦w¨½
·s¥_¥«ªO¾ô°ÏºÖ¦w¨½	³¯°ê­s	·s¥_¥«ªO¾ô°ÏºÖ¦w¨½³¯°ê­s	1	1	1960	µLÄÒÄy¤Î¥¼¸g¬FÄÒ±ÀÂË	0	0	971	0.5577	1	0	2	KMT	1	0.31102929	0.50657013	1.974060334	·s¥_¥«ªO¾ô°ÏºÖ¦w¨½
·s¥_¥«ªO¾ô°ÏºÖ¦w¨½	ªL§õ¥É±ö	·s¥_¥«ªO¾ô°ÏºÖ¦w¨½ªL§õ¥É±ö	2	0	1955	¤¤°ê°ê¥ÁÄÒ	1	0	770	0.4422	0	0	2	KMT	1	0.50657013	0.50657013	1.974060334	·s¥_¥«ªO¾ô°ÏºÖ¦w¨½
·s¥_¥«ªO¾ô°Ï»E¦w¨½	§õ¤ô²M	·s¥_¥«ªO¾ô°Ï»E¦w¨½§õ¤ô²M	1	1	1953	µLÄÒÄy¤Î¥¼¸g¬FÄÒ±ÀÂË	0	0	1395	0.433	0	0	2	KMT	1	0.187489	0.50886461	1.965159259	·s¥_¥«ªO¾ô°Ï»E¦w¨½
·s¥_¥«ªO¾ô°Ï»E¦w¨½	½²Â@ÀM	·s¥_¥«ªO¾ô°Ï»E¦w¨½½²Â@ÀM	2	1	1964	µLÄÒÄy¤Î¥¼¸g¬FÄÒ±ÀÂË	0	0	1826	0.5669	1	0	2	KMT	1	0.50886461	0.50886461	1.965159259	·s¥_¥«ªO¾ô°Ï»E¦w¨½
·s¥_¥«ªO¾ô°ÏÀs¦w¨½	¶À¬K¥Í	·s¥_¥«ªO¾ô°ÏÀs¦w¨½¶À¬K¥Í	1	1	1959	µLÄÒÄy¤Î¥¼¸g¬FÄÒ±ÀÂË	0	0	1659	1	1	0	1	KMT	1	1	1	1	·s¥_¥«ªO¾ô°ÏÀs¦w¨½
·s¥_¥«ªO¾ô°Ï±X±[¨½	ÃQ²l´¼	·s¥_¥«ªO¾ô°Ï±X±[¨½ÃQ²l´¼	1	1	1973	µLÄÒÄy¤Î¥¼¸g¬FÄÒ±ÀÂË	0	0	1946	0.3813	1	0	3	KMT	1	0.14538969	0.33677675	2.969326119	·s¥_¥«ªO¾ô°Ï±X±[¨½
·s¥_¥«ªO¾ô°Ï±X±[¨½	§d«a½÷	·s¥_¥«ªO¾ô°Ï±X±[¨½§d«a½÷	2	1	1963	µLÄÒÄy¤Î¥¼¸g¬FÄÒ±ÀÂË	0	0	1552	0.3041	0	0	3	KMT	1	0.2378665	0.33677675	2.969326119	·s¥_¥«ªO¾ô°Ï±X±[¨½
·s¥_¥«ªO¾ô°Ï±X±[¨½	¶Àª÷¤õ	·s¥_¥«ªO¾ô°Ï±X±[¨½¶Àª÷¤õ	3	1	1946	µLÄÒÄy¤Î¥¼¸g¬FÄÒ±ÀÂË	0	0	1605	0.3145	0	0	3	KMT	1	0.33677675	0.33677675	2.969326119	·s¥_¥«ªO¾ô°Ï±X±[¨½
·s¥_¥«ªO¾ô°Ï¦¨©M¨½	¾H¤ë¯ù	·s¥_¥«ªO¾ô°Ï¦¨©M¨½¾H¤ë¯ù	1	0	1953	µLÄÒÄy¤Î¥¼¸g¬FÄÒ±ÀÂË	0	0	2045	0.6674	1	0	2	KMT	1	0.44542276	0.55597901	1.798629053	·s¥_¥«ªO¾ô°Ï¦¨©M¨½
·s¥_¥«ªO¾ô°Ï¦¨©M¨½	¤ý´Ñ¤å	·s¥_¥«ªO¾ô°Ï¦¨©M¨½¤ý´Ñ¤å	2	1	1958	µLÄÒÄy¤Î¥¼¸g¬FÄÒ±ÀÂË	0	0	1019	0.3325	0	0	2	KMT	1	0.55597901	0.55597901	1.798629053	·s¥_¥«ªO¾ô°Ï¦¨©M¨½
·s¥_¥«ªO¾ô°Ï·Ë¬w¨½	¤ý¤s±T	·s¥_¥«ªO¾ô°Ï·Ë¬w¨½¤ý¤s±T	1	1	1960	µLÄÒÄy¤Î¥¼¸g¬FÄÒ±ÀÂË	0	0	2422	0.6971	1	0	2	KMT	1	0.48594841	0.57763625	1.73119329	·s¥_¥«ªO¾ô°Ï·Ë¬w¨½
·s¥_¥«ªO¾ô°Ï·Ë¬w¨½	³¯²Q¬ü	·s¥_¥«ªO¾ô°Ï·Ë¬w¨½³¯²Q¬ü	2	0	1961	µLÄÒÄy¤Î¥¼¸g¬FÄÒ±ÀÂË	0	0	1052	0.3028	0	0	2	KMT	1	0.57763625	0.57763625	1.73119329	·s¥_¥«ªO¾ô°Ï·Ë¬w¨½
·s¥_¥«ªO¾ô°Ï·ËºÖ¨½	ÄY®ÑùÙ	·s¥_¥«ªO¾ô°Ï·ËºÖ¨½ÄY®ÑùÙ	1	1	1950	¥Á¥D¶i¨BÄÒ	0	1	945	0.1395	0	0	5	KMT	1	0.01946025	0.22594647	4.425827055	·s¥_¥«ªO¾ô°Ï·ËºÖ¨½
·s¥_¥«ªO¾ô°Ï·ËºÖ¨½	ªô¨q½¼	·s¥_¥«ªO¾ô°Ï·ËºÖ¨½ªô¨q½¼	2	0	1952	µLÄÒÄy¤Î¥¼¸g¬FÄÒ±ÀÂË	0	0	2029	0.2996	1	0	5	KMT	1	0.10922041	0.22594647	4.425827055	·s¥_¥«ªO¾ô°Ï·ËºÖ¨½
·s¥_¥«ªO¾ô°Ï·ËºÖ¨½	§f¤T­¦	·s¥_¥«ªO¾ô°Ï·ËºÖ¨½§f¤T­¦	3	1	1940	¤¤°ê°ê¥ÁÄÒ	1	0	771	0.1138	0	0	5	KMT	1	0.12217085	0.22594647	4.425827055	·s¥_¥«ªO¾ô°Ï·ËºÖ¨½
·s¥_¥«ªO¾ô°Ï·ËºÖ¨½	¤ýôféØ	·s¥_¥«ªO¾ô°Ï·ËºÖ¨½¤ýôféØ	4	0	1974	µLÄÒÄy¤Î¥¼¸g¬FÄÒ±ÀÂË	0	0	1814	0.2679	0	0	5	KMT	1	0.19394126	0.22594647	4.425827055	·s¥_¥«ªO¾ô°Ï·ËºÖ¨½
·s¥_¥«ªO¾ô°Ï·ËºÖ¨½	¤ýª÷¸U	·s¥_¥«ªO¾ô°Ï·ËºÖ¨½¤ýª÷¸U	5	1	1948	µLÄÒÄy¤Î¥¼¸g¬FÄÒ±ÀÂË	0	0	1212	0.1789	0	0	5	KMT	1	0.22594647	0.22594647	4.425827055	·s¥_¥«ªO¾ô°Ï·ËºÖ¨½
·s¥_¥«ªO¾ô°Ï·Ë¥_¨½	¶À¬±«n	·s¥_¥«ªO¾ô°Ï·Ë¥_¨½¶À¬±«n	1	1	1953	µLÄÒÄy¤Î¥¼¸g¬FÄÒ±ÀÂË	0	0	1800	1	1	0	1	KMT	1	1	1	1	·s¥_¥«ªO¾ô°Ï·Ë¥_¨½
·s¥_¥«ªO¾ô°Ï°ó¬K¨½	¼B°ê·©	·s¥_¥«ªO¾ô°Ï°ó¬K¨½¼B°ê·©	1	1	1958	µLÄÒÄy¤Î¥¼¸g¬FÄÒ±ÀÂË	0	0	586	0.2469	0	0	2	KMT	1	0.06095961	0.62796861	1.592436284	·s¥_¥«ªO¾ô°Ï°ó¬K¨½
·s¥_¥«ªO¾ô°Ï°ó¬K¨½	¼B¥@¼Ð	·s¥_¥«ªO¾ô°Ï°ó¬K¨½¼B¥@¼Ð	2	1	1952	µLÄÒÄy¤Î¥¼¸g¬FÄÒ±ÀÂË	0	0	1787	0.753	1	0	2	KMT	1	0.62796861	0.62796861	1.592436284	·s¥_¥«ªO¾ô°Ï°ó¬K¨½
·s¥_¥«¤¤©M°Ï¤¤­ì¨½	³¯¥¿¼w	·s¥_¥«¤¤©M°Ï¤¤­ì¨½³¯¥¿¼w	1	1	1954	µLÄÒÄy¤Î¥¼¸g¬FÄÒ±ÀÂË	0	0	2141	1	1	0	1	KMT	1	1	1	1	·s¥_¥«¤¤©M°Ï¤¤­ì¨½
·s¥_¥«¤¤©M°Ï³s©M¨½	ªLÀAµØ	·s¥_¥«¤¤©M°Ï³s©M¨½ªLÀAµØ	1	1	1952	¤¤°ê°ê¥ÁÄÒ	1	0	1091	1	1	0	1	KMT	1	1	1	1	·s¥_¥«¤¤©M°Ï³s©M¨½
·s¥_¥«¤¤©M°Ï³s«°¨½	½²±R«°	·s¥_¥«¤¤©M°Ï³s«°¨½½²±R«°	1	1	1961	¤¤°ê°ê¥ÁÄÒ	1	0	1761	0.4894	0	0	2	KMT	1	0.23951236	0.50012261	1.99950968	·s¥_¥«¤¤©M°Ï³s«°¨½
·s¥_¥«¤¤©M°Ï³s«°¨½	ªL¤¯³Í	·s¥_¥«¤¤©M°Ï³s«°¨½ªL¤¯³Í	2	1	1962	¤¤°ê°ê¥ÁÄÒ	1	0	1837	0.5105	1	0	2	KMT	1	0.50012261	0.50012261	1.99950968	·s¥_¥«¤¤©M°Ï³s«°¨½
·s¥_¥«¤¤©M°Ï¤O¦æ¨½	©PÁo©ú	·s¥_¥«¤¤©M°Ï¤O¦æ¨½©PÁo©ú	1	1	1949	¤¤°ê°ê¥ÁÄÒ	1	0	3063	1	1	0	1	KMT	1	1	1	1	·s¥_¥«¤¤©M°Ï¤O¦æ¨½
·s¥_¥«¤¤©M°Ï¥¿¦æ¨½	½²¨}§ü	·s¥_¥«¤¤©M°Ï¥¿¦æ¨½½²¨}§ü	1	1	1952	¤¤°ê°ê¥ÁÄÒ	1	0	1177	0.663	1	0	2	KMT	1	0.439569	0.55307061	1.808087398	·s¥_¥«¤¤©M°Ï¥¿¦æ¨½
·s¥_¥«¤¤©M°Ï¥¿¦æ¨½	ªL¥­´Ü	·s¥_¥«¤¤©M°Ï¥¿¦æ¨½ªL¥­´Ü	2	1	1948	¤¤°ê°ê¥ÁÄÒ	1	0	598	0.3369	0	0	2	KMT	1	0.55307061	0.55307061	1.808087398	·s¥_¥«¤¤©M°Ï¥¿¦æ¨½
·s¥_¥«¤¤©M°Ï¼w¦æ¨½	³¯ÀR©y	·s¥_¥«¤¤©M°Ï¼w¦æ¨½³¯ÀR©y	1	0	1960	¤¤°ê°ê¥ÁÄÒ	1	0	2282	0.6449	1	0	2	KMT	1	0.41589601	0.54192101	1.845287379	·s¥_¥«¤¤©M°Ï¼w¦æ¨½
·s¥_¥«¤¤©M°Ï¼w¦æ¨½	ÃC©ú¯u	·s¥_¥«¤¤©M°Ï¼w¦æ¨½ÃC©ú¯u	2	0	1962	µLÄÒÄy¤Î¥¼¸g¬FÄÒ±ÀÂË	0	0	1256	0.355	0	0	2	KMT	1	0.54192101	0.54192101	1.845287379	·s¥_¥«¤¤©M°Ï¼w¦æ¨½
·s¥_¥«¤¤©M°ÏªD¼d¨½	Ã¹¥K·É	·s¥_¥«¤¤©M°ÏªD¼d¨½Ã¹¥K·É	1	1	1956	¤¤°ê°ê¥ÁÄÒ	1	0	1861	1	1	0	1	KMT	1	1	1	1	·s¥_¥«¤¤©M°ÏªD¼d¨½
·s¥_¥«¤¤©M°Ïºs©M¨½	¼B«Ø²±	·s¥_¥«¤¤©M°Ïºs©M¨½¼B«Ø²±	1	1	1959	µLÄÒÄy¤Î¥¼¸g¬FÄÒ±ÀÂË	0	0	1789	1	1	0	1	KMT	1	1	1	1	·s¥_¥«¤¤©M°Ïºs©M¨½
·s¥_¥«¤¤©M°Ï¼q¬ü¨½	¤ý¥Ã¶¶	·s¥_¥«¤¤©M°Ï¼q¬ü¨½¤ý¥Ã¶¶	1	1	1968	µLÄÒÄy¤Î¥¼¸g¬FÄÒ±ÀÂË	0	0	1324	0.4898	0	0	2	KMT	1	0.23990404	0.50010605	1.99957589	·s¥_¥«¤¤©M°Ï¼q¬ü¨½
·s¥_¥«¤¤©M°Ï¼q¬ü¨½	´¿¨q¬ü	·s¥_¥«¤¤©M°Ï¼q¬ü¨½´¿¨q¬ü	2	0	1949	¤¤°ê°ê¥ÁÄÒ	1	0	1379	0.5101	1	0	2	KMT	1	0.50010605	0.50010605	1.99957589	·s¥_¥«¤¤©M°Ï¼q¬ü¨½
·s¥_¥«¤¤©M°ÏºÖ¯u¨½	½²¬Lµo	·s¥_¥«¤¤©M°ÏºÖ¯u¨½½²¬Lµo	1	1	1953	µLÄÒÄy¤Î¥¼¸g¬FÄÒ±ÀÂË	0	0	2203	1	1	0	1	KMT	1	1	1	1	·s¥_¥«¤¤©M°ÏºÖ¯u¨½
·s¥_¥«¤¤©M°ÏºÖµ½¨½	³¯·_ªQ	·s¥_¥«¤¤©M°ÏºÖµ½¨½³¯·_ªQ	1	1	1963	¤¤°ê°ê¥ÁÄÒ	1	0	2130	1	1	0	1	KMT	1	1	1	1	·s¥_¥«¤¤©M°ÏºÖµ½¨½
·s¥_¥«¤¤©M°ÏºÖ¬ü¨½	³\Ä_¯]	·s¥_¥«¤¤©M°ÏºÖ¬ü¨½³\Ä_¯]	1	0	1952	µLÄÒÄy¤Î¥¼¸g¬FÄÒ±ÀÂË	0	0	1187	0.4143	0	0	2	KMT	1	0.17164449	0.51457185	1.943363206	·s¥_¥«¤¤©M°ÏºÖ¬ü¨½
·s¥_¥«¤¤©M°ÏºÖ¬ü¨½	Ã¹¶¶¶©	·s¥_¥«¤¤©M°ÏºÖ¬ü¨½Ã¹¶¶¶©	2	1	1953	¤¤°ê°ê¥ÁÄÒ	1	0	1678	0.5856	1	0	2	KMT	1	0.51457185	0.51457185	1.943363206	·s¥_¥«¤¤©M°ÏºÖ¬ü¨½
·s¥_¥«¤¤©M°ÏºÖ²»¨½	±i©÷´Á	·s¥_¥«¤¤©M°ÏºÖ²»¨½±i©÷´Á	1	1	1958	µLÄÒÄy¤Î¥¼¸g¬FÄÒ±ÀÂË	0	0	1467	0.4922	0	0	2	KMT	1	0.24226084	0.50002013	1.999919483	·s¥_¥«¤¤©M°ÏºÖ²»¨½
·s¥_¥«¤¤©M°ÏºÖ²»¨½	³¯²r	·s¥_¥«¤¤©M°ÏºÖ²»¨½³¯²r	2	1	1950	µLÄÒÄy¤Î¥¼¸g¬FÄÒ±ÀÂË	0	0	1513	0.5077	1	0	2	KMT	1	0.50002013	0.50002013	1.999919483	·s¥_¥«¤¤©M°ÏºÖ²»¨½
·s¥_¥«¤¤©M°Ï¥Ë?¨½	ªLºöªÚ	·s¥_¥«¤¤©M°Ï¥Ë?¨½ªLºöªÚ	1	0	1972	¤¤°ê°ê¥ÁÄÒ	1	0	1884	0.6019	1	0	4	KMT	1	0.36228361	0.43940962	2.275780853	·s¥_¥«¤¤©M°Ï¥Ë?¨½
·s¥_¥«¤¤©M°Ï¥Ë?¨½	¬x¤åÀs	·s¥_¥«¤¤©M°Ï¥Ë?¨½¬x¤åÀs	2	1	1965	µLÄÒÄy¤Î¥¼¸g¬FÄÒ±ÀÂË	0	0	268	0.0856	0	0	4	KMT	1	0.36961097	0.43940962	2.275780853	·s¥_¥«¤¤©M°Ï¥Ë?¨½
·s¥_¥«¤¤©M°Ï¥Ë?¨½	³¯«Ø¦æ	·s¥_¥«¤¤©M°Ï¥Ë?¨½³¯«Ø¦æ	3	1	1943	¤¤°ê°ê¥ÁÄÒ	1	0	810	0.2587	0	0	4	KMT	1	0.43653666	0.43940962	2.275780853	·s¥_¥«¤¤©M°Ï¥Ë?¨½
·s¥_¥«¤¤©M°Ï¥Ë?¨½	¤ý°ê§Q	·s¥_¥«¤¤©M°Ï¥Ë?¨½¤ý°ê§Q	4	1	1963	¥Á¥D¶i¨BÄÒ	0	1	168	0.0536	0	0	4	KMT	1	0.43940962	0.43940962	2.275780853	·s¥_¥«¤¤©M°Ï¥Ë?¨½
·s¥_¥«¤¤©M°ÏºÖ©M¨½	³\¤åªÚ	·s¥_¥«¤¤©M°ÏºÖ©M¨½³\¤åªÚ	1	1	1957	µLÄÒÄy¤Î¥¼¸g¬FÄÒ±ÀÂË	0	0	947	0.4138	0	0	2	KMT	1	0.17123044	0.51474365	1.942714592	·s¥_¥«¤¤©M°ÏºÖ©M¨½
·s¥_¥«¤¤©M°ÏºÖ©M¨½	±iÄÁÁn	·s¥_¥«¤¤©M°ÏºÖ©M¨½±iÄÁÁn	2	1	1946	¤¤°ê°ê¥ÁÄÒ	1	0	1341	0.5861	1	0	2	KMT	1	0.51474365	0.51474365	1.942714592	·s¥_¥«¤¤©M°ÏºÖ©M¨½
·s¥_¥«¤¤©M°Ï¨Î©M¨½	³¯±oºÖ	·s¥_¥«¤¤©M°Ï¨Î©M¨½³¯±oºÖ	1	1	1957	¤¤°ê°ê¥ÁÄÒ	1	0	2382	1	1	0	1	KMT	1	1	1	1	·s¥_¥«¤¤©M°Ï¨Î©M¨½
·s¥_¥«¤¤©M°Ï·s«n¨½	¥Ó¤å³Õ	·s¥_¥«¤¤©M°Ï·s«n¨½¥Ó¤å³Õ	1	1	1957	¤¤°ê°ê¥ÁÄÒ	1	0	3885	1	1	0	1	KMT	1	1	1	1	·s¥_¥«¤¤©M°Ï·s«n¨½
·s¥_¥«¤¤©M°Ï«n¤s¨½	¬ö©¾©M	·s¥_¥«¤¤©M°Ï«n¤s¨½¬ö©¾©M	1	1	1959	¤¤°ê°ê¥ÁÄÒ	1	0	2752	1	1	0	1	KMT	1	1	1	1	·s¥_¥«¤¤©M°Ï«n¤s¨½
·s¥_¥«¤¤©M°Ï¥­ªe¨½	¶À²M·Ï	·s¥_¥«¤¤©M°Ï¥­ªe¨½¶À²M·Ï	1	1	1954	¤¤°ê°ê¥ÁÄÒ	1	0	4177	1	1	0	1	KMT	1	1	1	1	·s¥_¥«¤¤©M°Ï¥­ªe¨½
·s¥_¥«¤¤©M°Ï«H©M¨½	§d¤Ñ¶i	·s¥_¥«¤¤©M°Ï«H©M¨½§d¤Ñ¶i	1	1	1958	¤¤°ê°ê¥ÁÄÒ	1	0	2047	1	1	0	1	KMT	1	1	1	1	·s¥_¥«¤¤©M°Ï«H©M¨½
·s¥_¥«¤¤©M°Ï¤¯©M¨½	«À¥È¿Ñ	·s¥_¥«¤¤©M°Ï¤¯©M¨½«À¥È¿Ñ	1	1	1955	µLÄÒÄy¤Î¥¼¸g¬FÄÒ±ÀÂË	0	0	2174	1	1	0	1	KMT	1	1	1	1	·s¥_¥«¤¤©M°Ï¤¯©M¨½
·s¥_¥«¤¤©M°Ï¤¤¥¿¨½	§d©ú½÷	·s¥_¥«¤¤©M°Ï¤¤¥¿¨½§d©ú½÷	1	1	1951	¤¤°ê°ê¥ÁÄÒ	1	0	1451	0.5676	1	0	2	KMT	1	0.32216976	0.50905305	1.964431801	·s¥_¥«¤¤©M°Ï¤¤¥¿¨½
·s¥_¥«¤¤©M°Ï¤¤¥¿¨½	§õ¼y°]	·s¥_¥«¤¤©M°Ï¤¤¥¿¨½§õ¼y°]	2	1	1952	µLÄÒÄy¤Î¥¼¸g¬FÄÒ±ÀÂË	0	0	1105	0.4323	0	0	2	KMT	1	0.50905305	0.50905305	1.964431801	·s¥_¥«¤¤©M°Ï¤¤¥¿¨½
·s¥_¥«¤¤©M°Ï«Ø©M¨½	¼B¤å¥¿	·s¥_¥«¤¤©M°Ï«Ø©M¨½¼B¤å¥¿	1	1	1975	µLÄÒÄy¤Î¥¼¸g¬FÄÒ±ÀÂË	0	0	79	0.0314	0	0	4	KMT	1	0.00098596	0.32604333	3.067077005	·s¥_¥«¤¤©M°Ï«Ø©M¨½
·s¥_¥«¤¤©M°Ï«Ø©M¨½	·¨¯À±ö	·s¥_¥«¤¤©M°Ï«Ø©M¨½·¨¯À±ö	2	0	1947	¤¤°ê°ê¥ÁÄÒ	1	0	587	0.234	0	0	4	KMT	1	0.05574196	0.32604333	3.067077005	·s¥_¥«¤¤©M°Ï«Ø©M¨½
·s¥_¥«¤¤©M°Ï«Ø©M¨½	±çª÷¨}	·s¥_¥«¤¤©M°Ï«Ø©M¨½±çª÷¨}	3	1	1951	µLÄÒÄy¤Î¥¼¸g¬FÄÒ±ÀÂË	0	0	874	0.3484	0	0	4	KMT	1	0.17712452	0.32604333	3.067077005	·s¥_¥«¤¤©M°Ï«Ø©M¨½
·s¥_¥«¤¤©M°Ï«Ø©M¨½	¦¿¾å¨Ø	·s¥_¥«¤¤©M°Ï«Ø©M¨½¦¿¾å¨Ø	4	0	1973	¤¤°ê°ê¥ÁÄÒ	1	0	968	0.3859	1	0	4	KMT	1	0.32604333	0.32604333	3.067077005	·s¥_¥«¤¤©M°Ï«Ø©M¨½
·s¥_¥«¤¤©M°Ï¤¤¤s¨½	¦¿³·¼b	·s¥_¥«¤¤©M°Ï¤¤¤s¨½¦¿³·¼b	1	0	1952	µLÄÒÄy¤Î¥¼¸g¬FÄÒ±ÀÂË	0	0	1495	1	1	0	1	KMT	1	1	1	1	·s¥_¥«¤¤©M°Ï¤¤¤s¨½
·s¥_¥«¤¤©M°ÏºÑªe¨½	³\ªô¤B	·s¥_¥«¤¤©M°ÏºÑªe¨½³\ªô¤B	1	1	1952	¤¤°ê°ê¥ÁÄÒ	1	0	898	0.3777	0	0	2	KMT	1	0.14265729	0.52979013	1.887539883	·s¥_¥«¤¤©M°ÏºÑªe¨½
·s¥_¥«¤¤©M°ÏºÑªe¨½	¿à²MµØ	·s¥_¥«¤¤©M°ÏºÑªe¨½¿à²MµØ	2	1	1966	µLÄÒÄy¤Î¥¼¸g¬FÄÒ±ÀÂË	0	0	1479	0.6222	1	0	2	KMT	1	0.52979013	0.52979013	1.887539883	·s¥_¥«¤¤©M°ÏºÑªe¨½
·s¥_¥«¤¤©M°Ï¥¿«n¨½	´åº¡°ó	·s¥_¥«¤¤©M°Ï¥¿«n¨½´åº¡°ó	1	1	1951	¤¤°ê°ê¥ÁÄÒ	1	0	1715	1	1	0	1	KMT	1	1	1	1	·s¥_¥«¤¤©M°Ï¥¿«n¨½
·s¥_¥«¤¤©M°Ï³»«n¨½	ªL·ë³{	·s¥_¥«¤¤©M°Ï³»«n¨½ªL·ë³{	1	1	1964	¤¤°ê°ê¥ÁÄÒ	1	0	837	0.4071	0	0	2	KMT	1	0.16573041	0.51714225	1.933703928	·s¥_¥«¤¤©M°Ï³»«n¨½
·s¥_¥«¤¤©M°Ï³»«n¨½	ÁÂ´Ë¾§	·s¥_¥«¤¤©M°Ï³»«n¨½ÁÂ´Ë¾§	2	1	1962	¤¤°ê°ê¥ÁÄÒ	1	0	1219	0.5928	1	0	2	KMT	1	0.51714225	0.51714225	1.933703928	·s¥_¥«¤¤©M°Ï³»«n¨½
·s¥_¥«¤¤©M°ÏµØ·s¨½	±öºõ¼Ý	·s¥_¥«¤¤©M°ÏµØ·s¨½±öºõ¼Ý	1	1	1946	µLÄÒÄy¤Î¥¼¸g¬FÄÒ±ÀÂË	0	0	1082	0.2722	0	0	3	KMT	1	0.07409284	0.33972761	2.943534675	·s¥_¥«¤¤©M°ÏµØ·s¨½
·s¥_¥«¤¤©M°ÏµØ·s¨½	·¨ÀA·×	·s¥_¥«¤¤©M°ÏµØ·s¨½·¨ÀA·×	2	1	1962	µLÄÒÄy¤Î¥¼¸g¬FÄÒ±ÀÂË	0	0	1364	0.3431	0	0	3	KMT	1	0.19181045	0.33972761	2.943534675	·s¥_¥«¤¤©M°ÏµØ·s¨½
·s¥_¥«¤¤©M°ÏµØ·s¨½	Â²Âí¶m	·s¥_¥«¤¤©M°ÏµØ·s¨½Â²Âí¶m	3	1	1950	¤¤°ê°ê¥ÁÄÒ	1	0	1529	0.3846	1	0	3	KMT	1	0.33972761	0.33972761	2.943534675	·s¥_¥«¤¤©M°ÏµØ·s¨½
·s¥_¥«¤¤©M°ÏªF«n¨½	®}ª÷©f	·s¥_¥«¤¤©M°ÏªF«n¨½®}ª÷©f	1	0	1956	µLÄÒÄy¤Î¥¼¸g¬FÄÒ±ÀÂË	0	0	1090	0.4402	0	0	2	KMT	1	0.19377604	0.50704013	1.972230482	·s¥_¥«¤¤©M°ÏªF«n¨½
·s¥_¥«¤¤©M°ÏªF«n¨½	ªC¶³ªe	·s¥_¥«¤¤©M°ÏªF«n¨½ªC¶³ªe	2	1	1947	¤¤°ê°ê¥ÁÄÒ	1	0	1386	0.5597	1	0	2	KMT	1	0.50704013	0.50704013	1.972230482	·s¥_¥«¤¤©M°ÏªF«n¨½
·s¥_¥«¤¤©M°ÏµØ«n¨½	ªL¹Å´Ü	·s¥_¥«¤¤©M°ÏµØ«n¨½ªL¹Å´Ü	1	1	1966	µLÄÒÄy¤Î¥¼¸g¬FÄÒ±ÀÂË	0	0	1037	0.4106	0	0	2	KMT	1	0.16859236	0.51586685	1.938484708	·s¥_¥«¤¤©M°ÏµØ«n¨½
·s¥_¥«¤¤©M°ÏµØ«n¨½	ªL¥­µo	·s¥_¥«¤¤©M°ÏµØ«n¨½ªL¥­µo	2	1	1969	¤¤°ê°ê¥ÁÄÒ	1	0	1488	0.5893	1	0	2	KMT	1	0.51586685	0.51586685	1.938484708	·s¥_¥«¤¤©M°ÏµØ«n¨½
·s¥_¥«¤¤©M°Ï©¾§µ¨½	³¯²Q­»	·s¥_¥«¤¤©M°Ï©¾§µ¨½³¯²Q­»	1	0	1963	µLÄÒÄy¤Î¥¼¸g¬FÄÒ±ÀÂË	0	0	884	0.2981	0	0	2	KMT	1	0.08886361	0.58138685	1.720025143	·s¥_¥«¤¤©M°Ï©¾§µ¨½
·s¥_¥«¤¤©M°Ï©¾§µ¨½	§f¬îªF	·s¥_¥«¤¤©M°Ï©¾§µ¨½§f¬îªF	2	1	1952	¤¤°ê°ê¥ÁÄÒ	1	0	2081	0.7018	1	0	2	KMT	1	0.58138685	0.58138685	1.720025143	·s¥_¥«¤¤©M°Ï©¾§µ¨½
·s¥_¥«¤¤©M°Ï±R«n¨½	¾G­Z²±	·s¥_¥«¤¤©M°Ï±R«n¨½¾G­Z²±	1	1	1952	¤¤°ê°ê¥ÁÄÒ	1	0	1489	0.6629	1	0	2	KMT	1	0.43943641	0.55300541	1.808300573	·s¥_¥«¤¤©M°Ï±R«n¨½
·s¥_¥«¤¤©M°Ï±R«n¨½	¶À¤¯©v	·s¥_¥«¤¤©M°Ï±R«n¨½¶À¤¯©v	2	1	1969	µLÄÒÄy¤Î¥¼¸g¬FÄÒ±ÀÂË	0	0	757	0.337	0	0	2	KMT	1	0.55300541	0.55300541	1.808300573	·s¥_¥«¤¤©M°Ï±R«n¨½
·s¥_¥«¤¤©M°Ï¿³«n¨½	§f©ú§Ó	·s¥_¥«¤¤©M°Ï¿³«n¨½§f©ú§Ó	1	1	1958	¤¤°ê°ê¥ÁÄÒ	1	0	1562	0.7582	1	0	2	KMT	1	0.57486724	0.63328613	1.579065059	·s¥_¥«¤¤©M°Ï¿³«n¨½
·s¥_¥«¤¤©M°Ï¿³«n¨½	§f§Ó²»	·s¥_¥«¤¤©M°Ï¿³«n¨½§f§Ó²»	2	1	1973	µLÄÒÄy¤Î¥¼¸g¬FÄÒ±ÀÂË	0	0	498	0.2417	0	0	2	KMT	1	0.63328613	0.63328613	1.579065059	·s¥_¥«¤¤©M°Ï¿³«n¨½
·s¥_¥«¤¤©M°Ï´º«n¨½	ªô¯À­^	·s¥_¥«¤¤©M°Ï´º«n¨½ªô¯À­^	1	0	1966	µLÄÒÄy¤Î¥¼¸g¬FÄÒ±ÀÂË	0	0	734	0.3887	0	0	4	KMT	1	0.15108769	0.39442404	2.53534242	·s¥_¥«¤¤©M°Ï´º«n¨½
·s¥_¥«¤¤©M°Ï´º«n¨½	ª÷©À·O	·s¥_¥«¤¤©M°Ï´º«n¨½ª÷©À·O	2	0	1950	µLÄÒÄy¤Î¥¼¸g¬FÄÒ±ÀÂË	0	0	43	0.0227	0	0	4	KMT	1	0.15160298	0.39442404	2.53534242	·s¥_¥«¤¤©M°Ï´º«n¨½
·s¥_¥«¤¤©M°Ï´º«n¨½	ªL¾å§Í	·s¥_¥«¤¤©M°Ï´º«n¨½ªL¾å§Í	3	0	1965	µLÄÒÄy¤Î¥¼¸g¬FÄÒ±ÀÂË	0	0	203	0.1075	0	0	4	KMT	1	0.16315923	0.39442404	2.53534242	·s¥_¥«¤¤©M°Ï´º«n¨½
·s¥_¥«¤¤©M°Ï´º«n¨½	­J¦t¨°	·s¥_¥«¤¤©M°Ï´º«n¨½­J¦t¨°	4	0	1973	¤¤°ê°ê¥ÁÄÒ	1	0	908	0.4809	1	0	4	KMT	1	0.39442404	0.39442404	2.53534242	·s¥_¥«¤¤©M°Ï´º«n¨½
·s¥_¥«¤¤©M°Ï´º¥»¨½	±iªL¨qÄR	·s¥_¥«¤¤©M°Ï´º¥»¨½±iªL¨qÄR	1	0	1955	µLÄÒÄy¤Î¥¼¸g¬FÄÒ±ÀÂË	0	0	734	0.5125	1	0	2	KMT	1	0.26265625	0.50021501	1.99914033	·s¥_¥«¤¤©M°Ï´º¥»¨½
·s¥_¥«¤¤©M°Ï´º¥»¨½	´å¤å¶Q	·s¥_¥«¤¤©M°Ï´º¥»¨½´å¤å¶Q	2	1	1951	¤¤°ê°ê¥ÁÄÒ	1	0	698	0.4874	0	0	2	KMT	1	0.50021501	0.50021501	1.99914033	·s¥_¥«¤¤©M°Ï´º¥»¨½
·s¥_¥«¤¤©M°Ï¾î¸ô¨½	§f¬P½÷	·s¥_¥«¤¤©M°Ï¾î¸ô¨½§f¬P½÷	1	1	1967	¤¤°ê°ê¥ÁÄÒ	1	0	243	1	1	0	1	KMT	1	1	1	1	·s¥_¥«¤¤©M°Ï¾î¸ô¨½
·s¥_¥«¤¤©M°Ï¤º«n¨½	´¿ª÷ÁH	·s¥_¥«¤¤©M°Ï¤º«n¨½´¿ª÷ÁH	1	1	1952	¤¤°ê°ê¥ÁÄÒ	1	0	1649	0.5114	1	0	3	KMT	1	0.26152996	0.40156446	2.490260219	·s¥_¥«¤¤©M°Ï¤º«n¨½
·s¥_¥«¤¤©M°Ï¤º«n¨½	¥j¼w°]	·s¥_¥«¤¤©M°Ï¤º«n¨½¥j¼w°]	2	1	1960	µLÄÒÄy¤Î¥¼¸g¬FÄÒ±ÀÂË	0	0	1116	0.3461	0	0	3	KMT	1	0.38131517	0.40156446	2.490260219	·s¥_¥«¤¤©M°Ï¤º«n¨½
·s¥_¥«¤¤©M°Ï¤º«n¨½	¸­»Ê¶¯	·s¥_¥«¤¤©M°Ï¤º«n¨½¸­»Ê¶¯	3	1	1959	µLÄÒÄy¤Î¥¼¸g¬FÄÒ±ÀÂË	0	0	459	0.1423	0	0	3	KMT	1	0.40156446	0.40156446	2.490260219	·s¥_¥«¤¤©M°Ï¤º«n¨½
·s¥_¥«¤¤©M°Ï¹Ø«n¨½	§fªZ¶¯	·s¥_¥«¤¤©M°Ï¹Ø«n¨½§fªZ¶¯	1	1	1948	¤¤°ê°ê¥ÁÄÒ	1	0	1334	1	1	0	1	KMT	1	1	1	1	·s¥_¥«¤¤©M°Ï¹Ø«n¨½
·s¥_¥«¤¤©M°ÏºÖ«n¨½	¿à«Ø¥¿	·s¥_¥«¤¤©M°ÏºÖ«n¨½¿à«Ø¥¿	1	1	1969	µLÄÒÄy¤Î¥¼¸g¬FÄÒ±ÀÂË	0	0	828	0.3263	0	0	2	KMT	1	0.10647169	0.56020865	1.785049196	·s¥_¥«¤¤©M°ÏºÖ«n¨½
·s¥_¥«¤¤©M°ÏºÖ«n¨½	§d°ê±j	·s¥_¥«¤¤©M°ÏºÖ«n¨½§d°ê±j	2	1	1956	¤¤°ê°ê¥ÁÄÒ	1	0	1709	0.6736	1	0	2	KMT	1	0.56020865	0.56020865	1.785049196	·s¥_¥«¤¤©M°ÏºÖ«n¨½
·s¥_¥«¤¤©M°Ï¥~«n¨½	ªL·½¬u	·s¥_¥«¤¤©M°Ï¥~«n¨½ªL·½¬u	1	1	1967	µLÄÒÄy¤Î¥¼¸g¬FÄÒ±ÀÂË	0	0	541	0.2229	0	0	2	KMT	1	0.04968441	0.65341341	1.530424666	·s¥_¥«¤¤©M°Ï¥~«n¨½
·s¥_¥«¤¤©M°Ï¥~«n¨½	³sÅã¹F	·s¥_¥«¤¤©M°Ï¥~«n¨½³sÅã¹F	2	1	1948	¤¤°ê°ê¥ÁÄÒ	1	0	1886	0.777	1	0	2	KMT	1	0.65341341	0.65341341	1.530424666	·s¥_¥«¤¤©M°Ï¥~«n¨½
·s¥_¥«¤¤©M°Ï¤¤¿³¨½	´å§ÓÂE	·s¥_¥«¤¤©M°Ï¤¤¿³¨½´å§ÓÂE	1	1	1962	¤¤°ê°ê¥ÁÄÒ	1	0	3096	1	1	0	1	KMT	1	1	1	1	·s¥_¥«¤¤©M°Ï¤¤¿³¨½
·s¥_¥«¤¤©M°Ï¦N¿³¨½	³¯¦¨¥\	·s¥_¥«¤¤©M°Ï¦N¿³¨½³¯¦¨¥\	1	1	1963	µLÄÒÄy¤Î¥¼¸g¬FÄÒ±ÀÂË	0	0	1138	0.6066	1	0	2	KMT	1	0.36796356	0.52264845	1.913331992	·s¥_¥«¤¤©M°Ï¦N¿³¨½
·s¥_¥«¤¤©M°Ï¦N¿³¨½	¦ó¨q¬Ã	·s¥_¥«¤¤©M°Ï¦N¿³¨½¦ó¨q¬Ã	2	0	1962	¤¤°ê°ê¥ÁÄÒ	1	0	738	0.3933	0	0	2	KMT	1	0.52264845	0.52264845	1.913331992	·s¥_¥«¤¤©M°Ï¦N¿³¨½
·s¥_¥«¤¤©M°Ï´_¿³¨½	§º¶h¶{	·s¥_¥«¤¤©M°Ï´_¿³¨½§º¶h¶{	1	1	1984	µLÄÒÄy¤Î¥¼¸g¬FÄÒ±ÀÂË	0	0	230	0.0737	0	0	4	KMT	1	0.00543169	0.35232693	2.838272964	·s¥_¥«¤¤©M°Ï´_¿³¨½
·s¥_¥«¤¤©M°Ï´_¿³¨½	»¯±Ó­ë	·s¥_¥«¤¤©M°Ï´_¿³¨½»¯±Ó­ë	2	1	1948	¤¤°ê°ê¥ÁÄÒ	1	0	1326	0.425	1	0	4	KMT	1	0.18605669	0.35232693	2.838272964	·s¥_¥«¤¤©M°Ï´_¿³¨½
·s¥_¥«¤¤©M°Ï´_¿³¨½	¶ÀÄR®S	·s¥_¥«¤¤©M°Ï´_¿³¨½¶ÀÄR®S	3	0	1956	µLÄÒÄy¤Î¥¼¸g¬FÄÒ±ÀÂË	0	0	1227	0.3932	0	0	4	KMT	1	0.34066293	0.35232693	2.838272964	·s¥_¥«¤¤©M°Ï´_¿³¨½
·s¥_¥«¤¤©M°Ï´_¿³¨½	ÃCª÷³¶	·s¥_¥«¤¤©M°Ï´_¿³¨½ÃCª÷³¶	4	0	1957	µLÄÒÄy¤Î¥¼¸g¬FÄÒ±ÀÂË	0	0	337	0.108	0	0	4	KMT	1	0.35232693	0.35232693	2.838272964	·s¥_¥«¤¤©M°Ï´_¿³¨½
·s¥_¥«¤¤©M°Ï©M¿³¨½	½²Âz¦p	·s¥_¥«¤¤©M°Ï©M¿³¨½½²Âz¦p	1	0	1961	µLÄÒÄy¤Î¥¼¸g¬FÄÒ±ÀÂË	0	0	2214	1	1	0	1	KMT	1	1	1	1	·s¥_¥«¤¤©M°Ï©M¿³¨½
·s¥_¥«¤¤©M°Ï´º¥­¨½	´å¶i¿³	·s¥_¥«¤¤©M°Ï´º¥­¨½´å¶i¿³	1	1	1957	¤¤°ê°ê¥ÁÄÒ	1	0	2434	1	1	0	1	KMT	1	1	1	1	·s¥_¥«¤¤©M°Ï´º¥­¨½
·s¥_¥«¤¤©M°Ï´º·s¨½	´å¦¨®a	·s¥_¥«¤¤©M°Ï´º·s¨½´å¦¨®a	1	1	1959	¤¤°ê°ê¥ÁÄÒ	1	0	1862	1	1	0	1	KMT	1	1	1	1	·s¥_¥«¤¤©M°Ï´º·s¨½
·s¥_¥«¤¤©M°Ï´ººÖ¨½	¤ý©[­Z	·s¥_¥«¤¤©M°Ï´ººÖ¨½¤ý©[­Z	1	1	1953	¤¤°ê°ê¥ÁÄÒ	1	0	2334	1	1	0	1	KMT	1	1	1	1	·s¥_¥«¤¤©M°Ï´ººÖ¨½
·s¥_¥«¤¤©M°Ï´º¦w¨½	ªLÁo¾Ë	·s¥_¥«¤¤©M°Ï´º¦w¨½ªLÁo¾Ë	1	1	1956	¤¤°ê°ê¥ÁÄÒ	1	0	2699	1	1	0	1	KMT	1	1	1	1	·s¥_¥«¤¤©M°Ï´º¦w¨½
·s¥_¥«¤¤©M°Ï´º¤å¨½	ªLªF»Ê	·s¥_¥«¤¤©M°Ï´º¤å¨½ªLªF»Ê	1	1	1956	¤¤°ê°ê¥ÁÄÒ	1	0	1746	1	1	0	1	KMT	1	1	1	1	·s¥_¥«¤¤©M°Ï´º¤å¨½
·s¥_¥«¤¤©M°ÏÀA©M¨½	ªL¶i©ú	·s¥_¥«¤¤©M°ÏÀA©M¨½ªL¶i©ú	1	1	1961	µLÄÒÄy¤Î¥¼¸g¬FÄÒ±ÀÂË	0	0	2719	1	1	0	1	KMT	1	1	1	1	·s¥_¥«¤¤©M°ÏÀA©M¨½
·s¥_¥«¤¤©M°ÏÀA©÷¨½	­S¤å½÷	·s¥_¥«¤¤©M°ÏÀA©÷¨½­S¤å½÷	1	1	1965	¤¤°ê°ê¥ÁÄÒ	1	0	800	0.6932	1	0	2	KMT	1	0.48052624	0.57459113	1.740367973	·s¥_¥«¤¤©M°ÏÀA©÷¨½
·s¥_¥«¤¤©M°ÏÀA©÷¨½	¶À«Û¶{	·s¥_¥«¤¤©M°ÏÀA©÷¨½¶À«Û¶{	2	1	1970	µLÄÒÄy¤Î¥¼¸g¬FÄÒ±ÀÂË	0	0	354	0.3067	0	0	2	KMT	1	0.57459113	0.57459113	1.740367973	·s¥_¥«¤¤©M°ÏÀA©÷¨½
·s¥_¥«¤¤©M°Ï¦Ç?¨½	ªLøÊ§»	·s¥_¥«¤¤©M°Ï¦Ç?¨½ªLøÊ§»	1	1	1967	µLÄÒÄy¤Î¥¼¸g¬FÄÒ±ÀÂË	0	0	297	0.6346	1	0	2	KMT	1	0.40271716	0.53616125	1.865110543	·s¥_¥«¤¤©M°Ï¦Ç?¨½
·s¥_¥«¤¤©M°Ï¦Ç?¨½	³¯¦³¸q	·s¥_¥«¤¤©M°Ï¦Ç?¨½³¯¦³¸q	2	1	1945	µLÄÒÄy¤Î¥¼¸g¬FÄÒ±ÀÂË	0	0	171	0.3653	0	0	2	KMT	1	0.53616125	0.53616125	1.865110543	·s¥_¥«¤¤©M°Ï¦Ç?¨½
·s¥_¥«¤¤©M°Ï¿nÁJ¨½	½²¬Â§g	·s¥_¥«¤¤©M°Ï¿nÁJ¨½½²¬Â§g	1	0	1966	µLÄÒÄy¤Î¥¼¸g¬FÄÒ±ÀÂË	0	0	616	0.1285	0	0	3	KMT	1	0.01651225	0.40228794	2.485781702	·s¥_¥«¤¤©M°Ï¿nÁJ¨½
·s¥_¥«¤¤©M°Ï¿nÁJ¨½	¥Û²Q»ñ	·s¥_¥«¤¤©M°Ï¿nÁJ¨½¥Û²Q»ñ	2	0	1956	¤¤°ê°ê¥ÁÄÒ	1	0	2354	0.4913	1	0	3	KMT	1	0.25788794	0.40228794	2.485781702	·s¥_¥«¤¤©M°Ï¿nÁJ¨½
·s¥_¥«¤¤©M°Ï¿nÁJ¨½	¦ó«Ø¿³	·s¥_¥«¤¤©M°Ï¿nÁJ¨½¦ó«Ø¿³	3	1	1969	µLÄÒÄy¤Î¥¼¸g¬FÄÒ±ÀÂË	0	0	1821	0.38	0	0	3	KMT	1	0.40228794	0.40228794	2.485781702	·s¥_¥«¤¤©M°Ï¿nÁJ¨½
·s¥_¥«¤¤©M°Ï¥Á¨É¨½	Â²¥Á§Q	·s¥_¥«¤¤©M°Ï¥Á¨É¨½Â²¥Á§Q	1	1	1958	¤¤°ê°ê¥ÁÄÒ	1	0	1420	1	1	0	1	KMT	1	1	1	1	·s¥_¥«¤¤©M°Ï¥Á¨É¨½
·s¥_¥«¤¤©M°Ï­û¤s¨½	³¯ªB½÷	·s¥_¥«¤¤©M°Ï­û¤s¨½³¯ªB½÷	1	1	1951	µLÄÒÄy¤Î¥¼¸g¬FÄÒ±ÀÂË	0	0	1423	0.4153	0	0	2	KMT	1	0.17247409	0.51423125	1.944650388	·s¥_¥«¤¤©M°Ï­û¤s¨½
·s¥_¥«¤¤©M°Ï­û¤s¨½	ÂÅ°êÄÁ	·s¥_¥«¤¤©M°Ï­û¤s¨½ÂÅ°êÄÁ	2	1	1953	µLÄÒÄy¤Î¥¼¸g¬FÄÒ±ÀÂË	0	0	2003	0.5846	1	0	2	KMT	1	0.51423125	0.51423125	1.944650388	·s¥_¥«¤¤©M°Ï­û¤s¨½
·s¥_¥«¤¤©M°Ï¹ÅÁJ¨½	³¯ºaÄÁ	·s¥_¥«¤¤©M°Ï¹ÅÁJ¨½³¯ºaÄÁ	1	1	1963	¤¤°ê°ê¥ÁÄÒ	1	0	1351	1	1	0	1	KMT	1	1	1	1	·s¥_¥«¤¤©M°Ï¹ÅÁJ¨½
·s¥_¥«¤¤©M°Ï¤å¤¸¨½	ªL¦¿Âí	·s¥_¥«¤¤©M°Ï¤å¤¸¨½ªL¦¿Âí	1	1	1959	µLÄÒÄy¤Î¥¼¸g¬FÄÒ±ÀÂË	0	0	118	0.036	0	0	5	KMT	1	0.001296	0.24332842	4.109672023	·s¥_¥«¤¤©M°Ï¤å¤¸¨½
·s¥_¥«¤¤©M°Ï¤å¤¸¨½	ªL¼w¤¸	·s¥_¥«¤¤©M°Ï¤å¤¸¨½ªL¼w¤¸	2	1	1956	µLÄÒÄy¤Î¥¼¸g¬FÄÒ±ÀÂË	0	0	604	0.1844	0	0	5	KMT	1	0.03529936	0.24332842	4.109672023	·s¥_¥«¤¤©M°Ï¤å¤¸¨½
·s¥_¥«¤¤©M°Ï¤å¤¸¨½	½²²M¤s	·s¥_¥«¤¤©M°Ï¤å¤¸¨½½²²M¤s	3	1	1947	µLÄÒÄy¤Î¥¼¸g¬FÄÒ±ÀÂË	0	0	887	0.2709	0	0	5	KMT	1	0.10868617	0.24332842	4.109672023	·s¥_¥«¤¤©M°Ï¤å¤¸¨½
·s¥_¥«¤¤©M°Ï¤å¤¸¨½	¿àª÷ºÖ	·s¥_¥«¤¤©M°Ï¤å¤¸¨½¿àª÷ºÖ	4	1	1970	¤¤°ê°ê¥ÁÄÒ	1	0	663	0.2025	0	0	5	KMT	1	0.14969242	0.24332842	4.109672023	·s¥_¥«¤¤©M°Ï¤å¤¸¨½
·s¥_¥«¤¤©M°Ï¤å¤¸¨½	Ä¬·¶±Á	·s¥_¥«¤¤©M°Ï¤å¤¸¨½Ä¬·¶±Á	5	0	1942	¤¤°ê°ê¥ÁÄÒ	1	0	1002	0.306	1	0	5	KMT	1	0.24332842	0.24332842	4.109672023	·s¥_¥«¤¤©M°Ï¤å¤¸¨½
·s¥_¥«¤¤©M°Ï¹Å·s¨½	ªL¦ZºÖ	·s¥_¥«¤¤©M°Ï¹Å·s¨½ªL¦ZºÖ	1	1	1967	µLÄÒÄy¤Î¥¼¸g¬FÄÒ±ÀÂË	0	0	1081	0.4693	0	0	2	KMT	1	0.22024249	0.50177885	1.992909825	·s¥_¥«¤¤©M°Ï¹Å·s¨½
·s¥_¥«¤¤©M°Ï¹Å·s¨½	ªL¥Ã»É	·s¥_¥«¤¤©M°Ï¹Å·s¨½ªL¥Ã»É	2	1	1959	µLÄÒÄy¤Î¥¼¸g¬FÄÒ±ÀÂË	0	0	1222	0.5306	1	0	2	KMT	1	0.50177885	0.50177885	1.992909825	·s¥_¥«¤¤©M°Ï¹Å·s¨½
·s¥_¥«¤¤©M°Ï¥Á¦w¨½	¹ù¤ô¦P	·s¥_¥«¤¤©M°Ï¥Á¦w¨½¹ù¤ô¦P	1	1	1952	µLÄÒÄy¤Î¥¼¸g¬FÄÒ±ÀÂË	0	0	2509	1	1	0	1	KMT	1	1	1	1	·s¥_¥«¤¤©M°Ï¥Á¦w¨½
·s¥_¥«¤¤©M°Ï¦wÁJ¨½	©P½ç¶Q	·s¥_¥«¤¤©M°Ï¦wÁJ¨½©P½ç¶Q	1	1	1947	µLÄÒÄy¤Î¥¼¸g¬FÄÒ±ÀÂË	0	0	1693	0.6815	1	0	2	KMT	1	0.46444225	0.56582081	1.767343976	·s¥_¥«¤¤©M°Ï¦wÁJ¨½
·s¥_¥«¤¤©M°Ï¦wÁJ¨½	§õ°ê¿³	·s¥_¥«¤¤©M°Ï¦wÁJ¨½§õ°ê¿³	2	1	1956	µLÄÒÄy¤Î¥¼¸g¬FÄÒ±ÀÂË	0	0	791	0.3184	0	0	2	KMT	1	0.56582081	0.56582081	1.767343976	·s¥_¥«¤¤©M°Ï¦wÁJ¨½
·s¥_¥«¤¤©M°Ï·çÁJ¨½	³\¸UºÖ	·s¥_¥«¤¤©M°Ï·çÁJ¨½³\¸UºÖ	1	1	1945	µLÄÒÄy¤Î¥¼¸g¬FÄÒ±ÀÂË	0	0	310	0.2222	0	0	2	KMT	1	0.04937284	0.65419013	1.528607593	·s¥_¥«¤¤©M°Ï·çÁJ¨½
·s¥_¥«¤¤©M°Ï·çÁJ¨½	³¯¬üµØ	·s¥_¥«¤¤©M°Ï·çÁJ¨½³¯¬üµØ	2	0	1971	¤¤°ê°ê¥ÁÄÒ	1	0	1085	0.7777	1	0	2	KMT	1	0.65419013	0.65419013	1.528607593	·s¥_¥«¤¤©M°Ï·çÁJ¨½
·s¥_¥«¤¤©M°Ï©úÁJ¨½	¶À©úµÏ	·s¥_¥«¤¤©M°Ï©úÁJ¨½¶À©úµÏ	1	1	1952	¤¤°ê°ê¥ÁÄÒ	1	0	1456	0.5153	1	0	2	KMT	1	0.26553409	0.50037125	1.998516102	·s¥_¥«¤¤©M°Ï©úÁJ¨½
·s¥_¥«¤¤©M°Ï©úÁJ¨½	¿½¼w·s	·s¥_¥«¤¤©M°Ï©úÁJ¨½¿½¼w·s	2	1	1953	µLÄÒÄy¤Î¥¼¸g¬FÄÒ±ÀÂË	0	0	1369	0.4846	0	0	2	KMT	1	0.50037125	0.50037125	1.998516102	·s¥_¥«¤¤©M°Ï©úÁJ¨½
·s¥_¥«¤¤©M°Ï²MÁJ¨½	¼B¬±°í	·s¥_¥«¤¤©M°Ï²MÁJ¨½¼B¬±°í	1	1	1950	¥Á¥D¶i¨BÄÒ	0	1	268	0.1368	0	0	3	KMT	1	0.01871424	0.39148517	2.554375176	·s¥_¥«¤¤©M°Ï²MÁJ¨½
·s¥_¥«¤¤©M°Ï²MÁJ¨½	¤ýª÷©w	·s¥_¥«¤¤©M°Ï²MÁJ¨½¤ýª÷©w	2	1	1953	¤¤°ê°ê¥ÁÄÒ	1	0	821	0.4193	0	0	3	KMT	1	0.19452673	0.39148517	2.554375176	·s¥_¥«¤¤©M°Ï²MÁJ¨½
·s¥_¥«¤¤©M°Ï²MÁJ¨½	¦ó¦aÄÁ	·s¥_¥«¤¤©M°Ï²MÁJ¨½¦ó¦aÄÁ	3	1	1956	¤¤°ê°ê¥ÁÄÒ	1	0	869	0.4438	1	0	3	KMT	1	0.39148517	0.39148517	2.554375176	·s¥_¥«¤¤©M°Ï²MÁJ¨½
·s¥_¥«¤¤©M°Ï¦Û±j¨½	ÁÂª÷¼w	·s¥_¥«¤¤©M°Ï¦Û±j¨½ÁÂª÷¼w	1	1	1952	µLÄÒÄy¤Î¥¼¸g¬FÄÒ±ÀÂË	0	0	2597	1	1	0	1	KMT	1	1	1	1	·s¥_¥«¤¤©M°Ï¦Û±j¨½
·s¥_¥«¤¤©M°Ï¼wÁJ¨½	¸â¤å©w	·s¥_¥«¤¤©M°Ï¼wÁJ¨½¸â¤å©w	1	1	1955	¤¤°ê°ê¥ÁÄÒ	1	0	1767	0.6617	1	0	2	KMT	1	0.43784689	0.55222613	1.810852377	·s¥_¥«¤¤©M°Ï¼wÁJ¨½
·s¥_¥«¤¤©M°Ï¼wÁJ¨½	§E©ú®i	·s¥_¥«¤¤©M°Ï¼wÁJ¨½§E©ú®i	2	1	1980	µLÄÒÄy¤Î¥¼¸g¬FÄÒ±ÀÂË	0	0	903	0.3382	0	0	2	KMT	1	0.55222613	0.55222613	1.810852377	·s¥_¥«¤¤©M°Ï¼wÁJ¨½
·s¥_¥«¤¤©M°Ï¥Á¥Í¨½	¦¶´ÂÅa	·s¥_¥«¤¤©M°Ï¥Á¥Í¨½¦¶´ÂÅa	1	0	1959	µLÄÒÄy¤Î¥¼¸g¬FÄÒ±ÀÂË	0	0	2312	1	1	0	1	KMT	1	1	1	1	·s¥_¥«¤¤©M°Ï¥Á¥Í¨½
·s¥_¥«¤¤©M°Ï°ê¥ú¨½	ÁÂ¤@¥ò	·s¥_¥«¤¤©M°Ï°ê¥ú¨½ÁÂ¤@¥ò	1	1	1968	¤¤°ê°ê¥ÁÄÒ	1	0	1737	1	1	0	1	KMT	1	1	1	1	·s¥_¥«¤¤©M°Ï°ê¥ú¨½
[truncated: 13,523 more rows]
